# FlyClockbase:

## Importance of **Biological Model Curation** for Analyzing Variability in the Circadian Clock of *Drosophila melanogaster* by Integrating Time Series from 25 Years of Research

Katherine S. **Scheuer**<sup>\*,†</sup>, Bret **Hanlon**<sup>‡</sup>, Jerdon W. **Dresel**<sup>\*,†</sup>, Erik D. **Nolan**<sup>\*,†</sup>,  
John C. **Davis**<sup>‡</sup>, Laurence **Loewe**<sup>\*,†</sup>

<sup>\*</sup>Systems Biology Theme, Wisconsin Institute for Discovery,  
University of Wisconsin-Madison, Madison, WI, 53715

<sup>†</sup>Laboratory of Genetics, University of Wisconsin-Madison, Madison, WI 53706

<sup>‡</sup>Department of Statistics, University of Wisconsin-Madison, Madison, WI, 53706

### General Article Summary

Circadian clocks impact health and fitness by controlling daily rhythms of gene-expression through complex gene-regulatory networks. Deciphering how they work requires experimentally tracking changes in amounts of clock components. We designed FlyClockbase to simplify data-access for biologists and modelers, curating over 400 time series observed in wildtype fruit flies from 25 years of clock research. Substantial biological model curation was essential for identifying differences in peak time variance of the clock-proteins 'PERIOD' and 'TIMELESS', which probably stem from differences in phosphorylation-network complexity.

We repeatedly encountered systemic limitations of contemporary data analysis strategies in our work on circadian clocks. Thus, we used it as an opportunity for composing a panoramic view of the broader challenges in biological model curation, which are likely to increase as biologists aim to integrate all existing expertise in order to address diverse grand challenges. We developed and tested a trans-disciplinary research workflow, which enables biologists and compiler-architects to define biology-friendly compilers for efficiently constructing and maintaining Versioned Biological Information Resources (VBIRs). We report insights gleaned from our practical clock research that are essential for defining a VBIRs infrastructure, which improves the efficiency of biological model curation to the point where it can be democratized.

Latest version at **BioRxiv.org** : <https://doi.org/10.1101/099192>

Scheuer *et al.* (2017)

1  
2  
3  
4  
5  
6  
7  
8  
9  
10  
11  
12  
13  
14  
15  
16  
17  
18  
19  
20  
21  
22  
23  
24  
25  
26  
27  
28  
29  
30  
31  
32  
33  
34  
35  
36  
37  
38  
39

**Running title:** FlyClockbase: curating time series variances

**Keywords / Key phrases:**

*Drosophila melanogaster* circadian clock model biological data input review, experimental time series peak-valley variance and outlier clock observations, differential variance hypothesis on PERIOD - TIMELESS amount peak times, data repository for estimating parameters of mechanistic simulation models, compiler logic enabling human error analysis simplifying biological model curation.

**Corresponding author:**

Laurence Loewe  
Wisconsin Institute for Discovery, University of Wisconsin-Madison,  
330 N Orchard St, Madison, WI, 53715  
Email: loewe@wisc.edu  
Phone: (608) 316-4324

**Statement of data availability**

Stabilizing Versioned Variant of this file: **QQv1r4\_2017m07d14\_Lion**  
Before final publication *FlyClockbase* will be at **<https://github.com/FlyClockbase>**  
For review purposes *FlyClockbase* QQv1r4 will be provided as a zip-archive in the uploaded Supplemental Material; it is also available upon request from L. Loewe.

**Abbreviations:**

Table 1: Molecular core clock components  
Table 2: Concepts for organizing FlyClockbase

**Supplemental Material:**

Appendix: Supplemental Text and Tables (32 pages included in this file, QQv1v4)  
Supplemental Statistical Analysis (87 pages not included in this file, QQv1v4)  
R-Script zip file (>12K lines not included in this file, QQv1v4)  
FlyClockbase zip file (available upon request, QQv1v4)

## Abstract

Biological model curation provides new insights by integrating biological knowledge-fragments, assessing their uncertainty, and analyzing the reliability of potential interpretations. Here we integrate published results about circadian clocks in *Drosophila melanogaster* while exploring economies of scale in biological model curation. Clocks govern rhythms of gene-expression that impact fitness, health, cancer, memory, mental functions, and more. Human clock insights have been repeatedly pioneered in flies. Flies simplify investigating complex gene regulatory networks, which express proteins cyclically using environmentally entrained interlocking feedback loops that act as clocks. Simulations could simplify research further. We found that very few computational models test their quality directly against experimentally observed time series scattered in the literature. We designed FlyClockbase for integrating such scattered data to enable robust efficient access for biologists and modelers. To this end we have been defining data structures that simplify the construction and maintenance of Versioned Biological Information Resources (VBIRs) that prioritize simplicity, openness, and therefore maintainability. We aim to simplify the preservation of more raw data and relevant annotations from experiments in order to multiply the long-term value of wet-lab datasets for modelers interested in meta-analyses, parameter estimates, and hypothesis testing. Currently FlyClockbase contains over 400 wildtype time series of core circadian components systematically curated from 86 studies published between 1990 and 2015. Using FlyClockbase, we show that PERIOD protein amount peak time variance unexpectedly exceeds that of TIMELESS. We hypothesize that PERIOD's exceedingly more complex phosphorylation rules are responsible. Variances of daily event times are easily confounded by errors. We improved result reliability by a human error analysis of our data handling; this revealed significance-degrading outliers, possibly violating a presumed absence of wildtype heterogeneity or lab evolution. Separate analyses revealed elevated stochasticity in PCR-based peak time variances; yet our reported core difference in peak time variances appears robust. Our study demonstrates how biological model curation enhances the understanding of circadian clocks. It also highlights diverse broader challenges that are likely to become recurrent themes if models in molecular systems biology aim to integrate 'all relevant knowledge'. We developed a trans-disciplinary workflow, which demonstrates the importance of developing compilers for VBIRs with a more biology-friendly logic that is likely to greatly simplify biological model curation. Curation-limited grand challenges, including personalizing medicine, critically depend on such progress if they are indeed to integrate 'all relevant knowledge'.

**FlyClockbase: Importance of Biological Model Curation for Analyzing Variability in the Circadian Clock of *D. melanogaster* by Integrating Time Series from 25 Years of Research**

**Table of Contents**

|    |                                                                                                                                   |           |
|----|-----------------------------------------------------------------------------------------------------------------------------------|-----------|
| 1  | <b>FRONT-MATTER: Abstracts &amp; Tables of Content</b>                                                                            | <b>1</b>  |
| 2  |                                                                                                                                   |           |
| 3  |                                                                                                                                   |           |
| 4  |                                                                                                                                   |           |
| 5  |                                                                                                                                   |           |
| 6  | <b>INTRODUCTION</b>                                                                                                               | <b>1</b>  |
| 7  |                                                                                                                                   |           |
| 8  | Challenges <b>1</b> --- Circadian clocks <b>2</b> --- Model organisms <b>3</b> --- Math models <b>3</b> --- Estimating            |           |
| 9  | unknown rates from observed time series <b>4</b> --- Biological example --- Models and reality                                    |           |
| 10 | Reproducibility of research <b>5</b> --- Firm foundations --- Problems with label reproducibility ---                             |           |
| 11 | Statistical reproducibility --- Statistical error iceberg --- Reproducibility in genetics <b>9</b> ---                            |           |
| 12 | Versioned Biological Information Resources ( <b>VBIRs</b> ) <b>9</b> --- Importance of versioned data integrators                 |           |
| 13 | Flexibility of <b>VBIRs</b> --- Database integration --- Cochrane review --- Genome projects as a model                           |           |
| 14 | for <b>VBIRs</b> development on a broader scale <b>12</b> --- Genome projects have revolutionized biology ---                     |           |
| 15 | Importance of biological model curation <b>13</b> --- How a compiler could help in biological model                               |           |
| 16 | curation <b>13</b> --- Enforce best practices --- Efficiencies of scale --- Opportunity <b>15</b> --- Purpose of                  |           |
| 17 | this study <b>15</b> --- Formal organization of Versioned Biological Information Resources ( <b>VBIRs</b> ) ---                   |           |
| 18 | Data integrated by curation --- Hypothesis tested: biological variability --- Hypothesis tested:                                  |           |
| 19 | observation method --- Human error analysis --- Compiler logic design --- Importance of efficient                                 |           |
| 20 | biological model curation --- Overview of Sections                                                                                |           |
| 21 |                                                                                                                                   |           |
| 22 |                                                                                                                                   |           |
| 23 | <b>MODELS</b>                                                                                                                     | <b>20</b> |
| 24 | <b>Biological model of fly circadian clocks</b> <b>20</b> --- Main loop <b>20</b> --- Other loops <b>21</b>                       |           |
| 25 | <b>In silico models integrating fly clock observations</b> <b>21</b> --- Biological results overview <b>21</b> --- Role           |           |
| 26 | of stochasticity <b>22</b> --- Shared problems <b>22</b> --- Parameter estimation in complex models <b>23</b> ---                 |           |
| 27 | Using abstract time series traits <b>24</b> --- Using complete observed time series <b>25</b> --- Using both                      |           |
| 28 | complete observed time series and abstract traits <b>27</b> --- Complete experimentally observed time                             |           |
| 29 | series --- Working with abstract time series traits --- Distances --- Both sides offer advantages                                 |           |
| 30 | Studies integrating time series data <b>29</b>                                                                                    |           |
| 31 | <b>FlyClockbase data model overview</b> <b>30</b> --- Overview <b>30</b> --- SumS, DetS --- Logic in biology <b>31</b> ---        |           |
| 32 | Other design decisions <b>32</b> --- Simple file system storage <b>32</b> --- Flexibility <b>33</b> --- Data types for            |           |
| 33 | organizing content <b>34</b> --- Content, Attributes, Traits --- Identification of <i>TimeSeries</i> <b>36</b> --- IDL, IDF,      |           |
| 34 | IDM, Ref.Fig.TS -- <i>Raw, Mod, and Odd Observations</i> <b>37</b> --- Data types of time measurements <b>38</b> ---              |           |
| 35 | <i>ZT, DZT, CZT</i> -- Data types of amounts <b>39</b> --- Current definition of scope <b>39</b> --- Collection of data <b>40</b> |           |
| 36 |                                                                                                                                   |           |
| 37 | <b>MATERIALS AND METHODS</b>                                                                                                      | <b>41</b> |
| 38 | <b>Literature search</b> <b>41</b> --- Initial eligibility assessment <b>41</b> --- Biological eligibility assessment <b>42</b>   |           |
| 39 | <b>TimeSeries data extraction</b> <b>43</b> --- Accuracy estimates of digitized <i>TimeSeries</i> data <b>43</b> ---              |           |
| 40 | Extracting <i>TimeSeries Attributes</i> <b>44</b>                                                                                 |           |
| 41 | <b>TimeSeries Traits analysis of Peaks and Valleys refined by ObsOdd checks</b> <b>46</b> ---                                     |           |
| 42 | Measuring a limit for maximal peak time variance <b>46</b> --- Factors contributing to                                            |           |
| 43 | increased trait variance <b>47</b> --- Linearizing Time Series Data <b>48</b>                                                     |           |
| 44 | <b>Statistical Analyses</b> <b>49</b> --- Automated analysis with R script <b>50</b> --- Outlier analysis <b>50</b> ---           |           |
| 45 | Testing differences in variance <b>51</b> --- Testing differences in mean <b>51</b> ---                                           |           |
| 46 | Supplemental Statistical Analysis <b>51</b>                                                                                       |           |
| 47 |                                                                                                                                   |           |
| 48 | <b>RESULTS</b>                                                                                                                    | <b>52</b> |
| 49 | <b>Experimental observations used in modeling</b> <b>52</b> --- see Figure 4 and 5                                                |           |
| 50 | <b>FlyClockbase is a new resource enabling studies of circadian clock TimeSeries</b> <b>53</b> --- Hypothesis                     |           |
| 51 | testing --- Error analysis <b>54</b> --- Overview of <i>TimeSeries Traits</i> <b>54</b> --- Why estimate errors? <b>54</b> ---    |           |
| 52 | Quality control in FlyClockbase and <i>TraitTables</i> <b>55</b> --- Basic Null-Hypothesis $H_{basic}$ <b>56</b>                  |           |
| 53 | <b>Hypothesis on Peak time variances: PER exceeds TIM</b> <b>57</b> --- Data quality <b>58</b> ---                                |           |
| 54 | Main analysis with outlier robustness --- Alternative handling of outliers <b>60</b> ---                                          |           |
| 55 | Other peak comparisons <b>60</b> --- Valley comparisons <b>61</b>                                                                 |           |
| 56 | <b>Comparing methods for measuring TimeSeries of per mRNA</b> <b>61</b> ---                                                       |           |
| 57 | Measurement methods <b>61</b> --- Comparing means ... and variances --- Method references <b>62</b> ---                           |           |
| 58 | Presence or absence of method references --- Presence or absence of shared method references ---                                  |           |
| 59 | Reduction of statistical power by application of inappropriate logic? <b>63</b> --- Result ---                                    |           |
| 60 | Comparing Methods by Study to Reduce Multiple Comparisons <b>65</b>                                                               |           |

|    |                                                                                                                                       |                    |
|----|---------------------------------------------------------------------------------------------------------------------------------------|--------------------|
| 1  | <b>DISCUSSION</b> .....                                                                                                               | <b>67</b>          |
| 2  | Why learn lessons on data? <b>67</b> --- Why do we need many <i>VBIRs</i> ? <b>67</b>                                                 |                    |
| 3  | <b>FlyClockbase is consistent with current hypotheses</b> <b>68</b> --- CLK and other proteins <b>68</b> ---                          |                    |
| 4  | PER and TIM dynamics <b>69</b>                                                                                                        |                    |
| 5  | <b>FlyClockbase facilitates hypothesis-driven research</b> <b>69</b> --- Starting with a blank slate <b>70</b> ---                    |                    |
| 6  | Using <i>Attributes</i> to compare timing variability <b>70</b> --- Existing hypotheses on timing <b>70</b> ---                       |                    |
| 7  | The strength of FlyClockbase <b>70</b>                                                                                                |                    |
| 8  | <b>Peak timing hypotheses and more: PER variance exceeds TIM variance</b> <b>71</b> ---                                               |                    |
| 9  | Comparing averages <b>71</b> --- Explaining averages <b>72</b> --- Comparing variances <b>72</b> --- Outliers <b>73</b> ---           |                    |
| 10 | Genetic background differences --- Environmental or developmental differences --- Environmental or                                    |                    |
| 11 | developmental differences for measured files --- Evolution in different lab environments --- Human                                    |                    |
| 12 | errors --- Conclusion on outliers --- Hypotheses on causes for differences in variance <b>76</b> ---                                  |                    |
| 13 | Phosphorylation network size --- Mechanistic phosphorylation network stochasticity hypotheses ---                                     |                    |
| 14 | Previous simulations --- Future simulations --- Expanding Hypotheses on CURLED <b>77</b>                                              |                    |
| 15 | <b>Hypothesis: peaks from PCR methods are more variable</b> <b>78</b> --- Methods background <b>78</b> ---                            |                    |
| 16 | Sensitivity vs Reproducibility <b>78</b> --- Poor reproducibility may be masked by biological variability <b>79</b> ---               |                    |
| 17 | Experimental causes for PCR variability <b>79</b> --- PCR and Northern Blot accuracy <b>80</b> ---                                    |                    |
| 18 | Differences between qPCR and RT-PCT? <b>80</b> --- Analysis of measurement protocol references                                        |                    |
| 19 | using FlyClockbase <b>80</b> --- Shared references are less frequent for PCR studies <b>81</b>                                        |                    |
| 20 | <b>Explanation: large fluctuations from PCR stochasticity</b> <b>81</b> --- Exponential growth causes                                 |                    |
| 21 | for PCR variability <b>81</b> --- Great sensitivity and poor reproducibility are linked <b>82</b> --- Observations                    |                    |
| 22 | of the theory <b>83</b> --- How this applies to amount peak timing observed by PCR --- Summary <b>83</b>                              |                    |
| 23 | <b>Model curation for integrating molecular systems biology data</b> <b>84</b> --- Related concrete                                   |                    |
| 24 | solutions <b>84</b> --- Related abstract frameworks <b>84</b> --- Baseline: Conceptual unity despite diversity of                     |                    |
| 25 | methods <b>85</b> --- Contradictory biological information <b>86</b> --- Debugging time limits --- Communicating                      |                    |
| 26 | errors --- Types of problems with data --- Using imperfect data Imperfection spelled out --- Problem                                  |                    |
| 27 | type repository --- The role of logic <b>88</b> --- Simple question: How many molecules of a given type exist                         |                    |
| 28 | at a given time in a given cell? <b>88</b> --- Curation efforts for circadian clock research <b>90</b> --- Perspectives               |                    |
| 29 | on biological model curation <b>93</b> --- Will tool development overwhelm biological goals? --- Will biology                         |                    |
| 30 | try to advance too fast for its own good? --- Balance                                                                                 |                    |
| 31 | <b>Towards a Compiler for Advancing FlyClockbase and Biology</b> <b>96</b> --- History <b>96</b> --- Unusual                          |                    |
| 32 | approaches to constructing an unusual compiler <b>96</b> --- Cost of <i>not</i> constructing a <i>VBIR</i> compiler <b>97</b>         |                    |
| 33 | Counter intuitive challenges and other work <b>98</b> --- More biological precision requires handling more                            |                    |
| 34 | imprecision more precisely --- Logic in gene regulatory networks --- Formal systems of logic are                                      |                    |
| 35 | usually not logical enough for biology <b>100</b> --- Data quality, plot quality, and task completion. --- Cost                       |                    |
| 36 | --- Implications for Logic --- How to detect logic errors in FlyClockbase <b>101</b> --- Error handling in the                        |                    |
| 37 | face of uncertainty <b>103</b> --- Opportunities --- Challenges --- Trans-disciplinary solutions --- Error                            |                    |
| 38 | analyses could be amortized across <i>VBIRs</i> by compilers <b>104</b> --- Efficiency --- Examples                                   |                    |
| 39 | <b>PopGen predictions on FlyClockbase survival and success</b> <b>105</b> --- The stage <b>106</b> --- Aging and                      |                    |
| 40 | death <b>106</b> --- Growth and reproduction <b>106</b> --- Speciation and merging <b>107</b> --- Extinction <b>107</b> ---           |                    |
| 41 | Horizontal gene transfer <b>107</b> --- Practically --- Potential predictions <b>109</b> --- Loss is likely <b>109</b> ---            |                    |
| 42 | Loss is fast and 'child mortality' matters <b>109</b> --- Fossilization is usually deadly <b>110</b>                                  |                    |
| 43 | <b>Next practical steps for FlyClockbase</b> <b>110</b> --- Reorganize files, define versioning policy and simplify                   |                    |
| 44 | folder structure <b>110</b> --- Use a public distributed version control system to be efficient <b>111</b> ---                        |                    |
| 45 | Develop TabFS <b>112</b> --- Tables in their simplest form --- TabFS specification --- Define a type system                           |                    |
| 46 | for TabFS <b>114</b> --- Automate TabFS checks to help expand the biology of FlyClockbase <b>115</b>                                  |                    |
| 47 | <b>Conclusion</b> <b>116</b> --- FlyClockbase as a <i>VBIR</i> <b>116</b> --- Designing a compiler for biological data <b>116</b> --- |                    |
| 48 | Trans-disciplinary aspects <b>117</b> --- View on gene expression variability <b>118</b> --- View on simplifying                      |                    |
| 49 | <i>VBIRs</i> work <b>118</b> --- View on Evolutionary System Biology <b>119</b> --- Biological model curation <b>119</b> ---          |                    |
| 50 | A growing avenue to biological research --- What it takes to get onto the shoulders of giants <b>121</b>                              |                    |
| 51 |                                                                                                                                       |                    |
| 52 | <b>ACKNOWLEDGEMENTS &amp; AUTHOR CONTRIBUTIONS</b> .....                                                                              | <b>122</b>         |
| 53 | <b>APPENDIX: SUPPLEMENTAL TEXT and TABLES</b> .....                                                                                   | <b>125</b>         |
| 54 | <b>LITERATURE CITED in Appendix and Main Text</b> .....                                                                               | <b>152 and 157</b> |
| 55 | <b>TABLES and FIGURES Overview</b> .....                                                                                              | <b>187</b>         |
| 56 | <b>TABLES</b> <b>1 to 8</b> .....                                                                                                     | <b>188</b>         |
| 57 | <b>FIGURES</b> <b>1 to 11</b> .....                                                                                                   | <b>200</b>         |

## TABLES OVERVIEW – MAIN TEXT

- 1  
2  
3 TABLE 1. **Circadian clock components** referenced in this study as introduced by their  
4 Brief, Explicit, Summarizing and Technical Name equivalents defined by  
5 using the Evolvix BEST Names concept *page 188*  
6  
7 TABLE 2. **FlyClockbase and VBIR concepts and related keywords** as introduced by their Brief, Explicit,  
8 and Summarizing Name equivalents defined by using the Evolvix BEST Names concept **189**  
9  
10 TABLE 3. **Data in FlyClockbase** counting independently observed *D. melanogaster* time series  
11 summaries available for each clock component in the Summary Section of FlyClockbase **195**  
12  
13 TABLE 4. **Time series overview**: average (*Avg*), standard deviation (*SD*), and number of time series  
14 available (*n*) for peak and valley times of some mRNA and proteins in FlyClockbase **196**  
15  
16 TABLE 5. **Human error rates** for four *Mod5 PeakValleyTables* **197**  
17  
18 TABLE 6: **Timing distribution differences** tested between *per* and *tim* to compare averages and  
19 variances of peak and valley times for proteins and mRNAs after removing outliers **198**  
20  
21 TABLE 7: **Impact of outlier removal** approaches on differences  
22 in variance of protein peak times (PER – TIM) **199**  
23  
24 TABLE 8. **Standardization proxies**: overview of potential approximations for quantifying method detail  
25 standardization and method detail similarity for independent observations of *per* mRNA **200**  
26

## FIGURES OVERVIEW – MAIN TEXT

- 27  
28  
29 FIGURE 1. **Systems biology overview** of the circadian clock in *D. melanogaster* **201**  
30  
31 FIGURE 2. **Overview of FlyClockbase** organization and data model **202**  
32  
33 FIGURE 3. **Workflow for refining** the time series traits reported in peak-valley-tables **204**  
34  
35 FIGURE 4. **Where do models get their realism from?** Overview of data sources reported **206**  
36  
37 FIGURE 5. **Data accumulation over time**: overview of experimental studies available in FlyClockbase  
38 and their use for parameter estimation over time **207**  
39  
40 FIGURE 6. **Hypotheses on timing variances in PER and TIM** as tested by FlyClockbase data.  
41 FlyClockbase extends our understanding of circadian clocks in flies by enabling observations of  
42 significant differences in variance between peaks and valleys of different clock components **208**  
43  
44 FIGURE 7. **Histograms for *per* and *tim* mRNA and protein** time series traits like peaks and valleys as  
45 observed in independent experiments show how FlyClockbase helps compare variability **210**  
46  
47 FIGURE 8. **Comparisons of PCR vs non-PCR methods** for measuring amounts of *per* mRNA in time  
48 series as enabled by FlyClockbase **212**  
49  
50 FIGURE 9. **Referenced protocol use similarity matrix** for studies reporting *per* mRNA time series,  
51 grouping protocols by measurement approach **214**  
52  
53 FIGURE 10: **Logic of datasets in statistics**: example for an interaction of statistics and formal logic  
54 where the logic for selecting datasets unnecessarily reduced the power of a statistical test **216**  
55  
56 FIGURE 11: **Biological model curator and compiler architect collaboration model** for improving the  
57 integration of biological data into *VBIRs* while constructing the type system required by a  
58 *VBIR* compiler for handling the ubiquitous uncertainty of biological data more precisely **217**  
59

## RELATED ANALYSES

60  
61  
62 **Hypotheses comparing timing in PER and TIM**: data and analyses in Table 4, Table S1, and Table 6,  
63 Table 7, Figure 6, Figure 7, as well as parts of the Supplemental Statistical Analysis are related.  
64

65 **Comparing PCR vs non-PCR methods for measuring time series in *per* mRNA**: data and analyses in  
66 Table 8, Figure 8, Figure 9, Figure 10, and parts of the Supplemental Statistical Analysis are related.

# FlyClockbase: Importance of Biological Model Curation for Analyzing Variability in the Circadian Clock of *Drosophila melanogaster* by Integrating Time Series from 25 Years of Research

Katherine S. Scheuer<sup>\*†</sup>, Bret Hanlon<sup>‡</sup>, Jerdon W. Dresel<sup>\*†</sup>, Erik D. Nolan<sup>\*†</sup>, John C. Davis<sup>‡</sup>, Laurence Loewe<sup>\*†</sup>

<sup>\*</sup>Systems Biology Theme, Wisconsin Institute for Discovery, <sup>†</sup>Laboratory of Genetics, <sup>‡</sup>Department of Statistics, University of Wisconsin-Madison

## Appendix: Supplemental Text

### Table of Contents

|                                                                                                                                                                                              |            |
|----------------------------------------------------------------------------------------------------------------------------------------------------------------------------------------------|------------|
| <b>1. FlyClockbase design processes in more detail</b>                                                                                                                                       | <b>126</b> |
| FlyClockbase development is intertwined with Evolvix                                                                                                                                         | 126        |
| --- FlyClockbase and its challenges to programming languages                                                                                                                                 | 127        |
| --- Evolvix development follows a unique approach                                                                                                                                            | 127        |
| --- Long-term goals of Evolvix                                                                                                                                                               | 128        |
| --- How FlyClockbase helped Evolvix                                                                                                                                                          | 128        |
| --- How Evolvix helped FlyClockbase                                                                                                                                                          | 129        |
| --- Stabilizing Versioning                                                                                                                                                                   | ---        |
| --- Examples: QQv1, RRV1                                                                                                                                                                     | ---        |
| --- Why stabilizing versioning?                                                                                                                                                              | 129        |
| --- Table P1                                                                                                                                                                                 | 130        |
| --- The role of TabFS in the stability of FlyClockbase                                                                                                                                       | ---        |
| --- How does stabilizing versioning benefit FlyClockbase?                                                                                                                                    | ---        |
| --- Types in FlyClockbase                                                                                                                                                                    | ---        |
| --- Test case for Evolvix                                                                                                                                                                    | ---        |
| --- Why not a conventional database?                                                                                                                                                         | 131        |
| --- Logic challenges posed by missing data                                                                                                                                                   | 132        |
| --- Table P2                                                                                                                                                                                 | 133        |
| --- Permissions, backups, and the reliability of data storage                                                                                                                                | 134        |
| --- Challenges in logic                                                                                                                                                                      | ---        |
| --- Trade-offs: paper vs databases vs filesystems                                                                                                                                            | ---        |
| --- Long-term stability in VBIRs data structures will enable new biology                                                                                                                     | 136        |
| --- Tombstone example                                                                                                                                                                        | 137        |
| <b>2. Human error analyses: approaches, challenges, efficiencies</b>                                                                                                                         | <b>138</b> |
| Finding capable curators                                                                                                                                                                     | 138        |
| --- Errors are inevitable                                                                                                                                                                    | 138        |
| --- Errors are hard to detect for humans                                                                                                                                                     | 139        |
| --- Human error analysis and prevention methods are difficult to develop                                                                                                                     | 139        |
| --- Error analysis could be amortized across resources by compilers                                                                                                                          | 142        |
| --- Efficiencies of scale                                                                                                                                                                    | 142        |
| --- Tool development and funding strategy development are connected tasks                                                                                                                    | 143        |
| <b>3. DISCOVARCHY Documentation Style Questions for Coders</b>                                                                                                                               | <b>144</b> |
| Source code as documentation                                                                                                                                                                 | 144        |
| --- Source code as electronic lab note book for <i>in silico</i> research                                                                                                                    | 144        |
| --- Trade-offs in code writing                                                                                                                                                               | 144        |
| --- DISCOVARCHY in brief                                                                                                                                                                     | 145        |
| --- Table D1                                                                                                                                                                                 | 146        |
| <b>4. Example of an error a compiler could have caught by type checking: Effect of linearizing clock times on distributions of Peaks and Valleys</b>                                         | <b>147</b> |
| Recall Example Context                                                                                                                                                                       | 147        |
| --- Problem in principle                                                                                                                                                                     | 147        |
| --- Problem in practice                                                                                                                                                                      | 148        |
| --- Uninformative DZTs                                                                                                                                                                       | 148        |
| --- Detecting excessive noise                                                                                                                                                                | 148        |
| --- Table S1                                                                                                                                                                                 | 149        |
| --- Solution by linearization                                                                                                                                                                | 150        |
| --- How a simple VBIR compiler can help                                                                                                                                                      | 150        |
| --- How a more advanced VBIR compiler can help                                                                                                                                               | 150        |
| --- Other examples                                                                                                                                                                           | 150        |
| --- Compilers that directly assist in biological research                                                                                                                                    | 151        |
| --- Expected cost reductions                                                                                                                                                                 | 151        |
| <b>5. Literature cited in supplemental material</b>                                                                                                                                          | <b>152</b> |
| <b>TABLE P1</b> The <i>StablizingZone</i> of the <i>Project Organization Stabilizing Tool</i> (POST) system is defined by the <i>StabilityCodes MM to TT</i> , presented by their BEST Names | 130        |
| <b>TABLE P2</b> The <i>BioBinary</i> data type for cases in biology that are less than clear-cut                                                                                             | 133        |
| <b>TABLE D1</b> The DISCOVARCHY questions on documentation style help highlight source code that is hard to read and might offer ideas for improving it efficiently                          | 146        |
| <b>TABLE S1</b> The impact of linearizing circadian time on summary statistics like the <i>Peak</i> (A) and <i>Valley</i> (B) traits of time series                                          | 149        |

# Are VBIRs like FlyClockbase The New Genome Projects?

Laurence Loewe and Kate Scheuer

Wisconsin Institute for Discovery and Laboratory of Genetics, University of Wisconsin-Madison

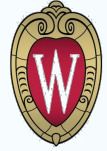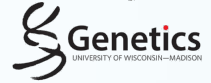

**Overview:** Most humans are quick to spot differences, but it takes statistics to see if they matter on average. Many statistical tests detect differences between means. Robust tests for differences in variance are more difficult to find. Yet their use does not guarantee meaningful results, because data errors can easily bias observed variances beyond recognition. We demonstrated how to resolve these challenges for documenting statistically significant differences between the peak time variances of the circadian clock proteins PERIOD and TIMELESS from observations of wildtype control *Drosophila melanogaster* over 25 years of clock research. For our analyses we used **FlyClockbase**, a new **Versioned Biological Information Resource (VBIR)** with 400+ time series relevant to fly clocks. We have been designing a VBIR format for maximizing ease of use and reliable access to data in order to simplify directly integrating observed time series into parameter estimates for mechanistic fly clock models. The challenges we faced inspired us to improve the efficiency of biological model curation, an activity that will become increasingly important as we strive to make better use of all available expertise. We continue to improve the definition of VBIRs and explore ways in which they can be used more efficiently to address the grand challenge of mechanistically mapping genotypes to phenotypes.

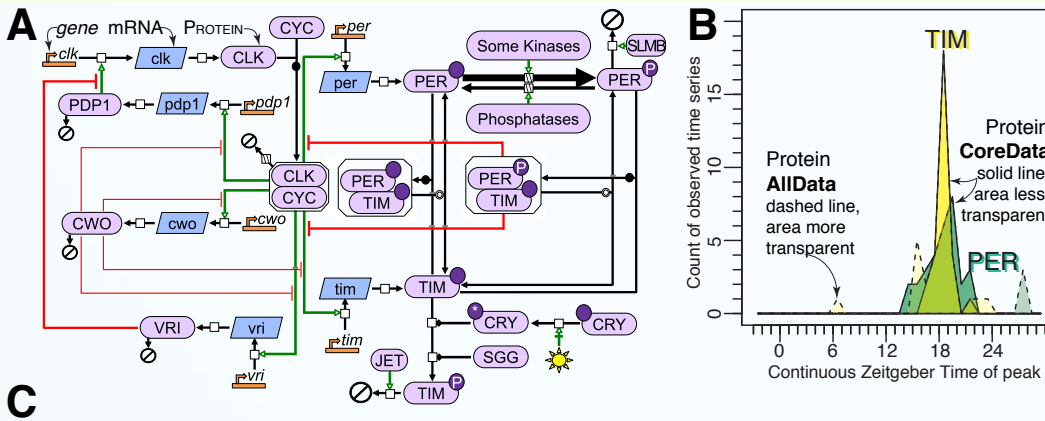

## Why VBIRs?

Genome projects convincingly show that batch processing of similar tasks boosts biological research efficiency. Costly reads of single genes shrank to simple queries in the post-genomics era, changing biology profoundly.

## Why is batch-processing efficient?

**It** inspires tools and workflows that speed-up tasks and reuse setup overheads. **It** improves quality by standardization. **It** inspires useful division of labor: a few can improve genome quality (via updates), used by many for testing hypotheses. Bundling updates into versions helps to improve quality by archiving and citing well-defined genome states reproducibly.

**We extend these ideas to other bio data types by introducing the VBIR concept for supporting FAIR data,**

Versioned ↔ Findable  
Biological ↔ Accessible  
Information ↔ Interoperable  
Resource ↔ Reusable,

highlighting rich interactions. Serving its well-defined scope, a VBIR stores all integrated data and updates in reproducibly versioned states of a well-structured biological info resource.

**VBIRs** vary widely in scope, size, implementation approach, etc. Yet, as indicated by the 'V', they provide past *versioned variants* via long-term, stable, reproducible URLs. Stable causal VBIRs inspire construction of consequential VBIRs, and help capture complex biological expertise in causality networks. Reproducibility of overall conclusions depends on the stability of VBIR data formats and the reliability of recalculations after auto-importing changed causal VBIRs. Such active networks of VBIRs can infer values, test hypotheses, or simulate complex biological systems. **VBIR stability is key for efficient computing** in evolutionary systems biology and personalizing medicine. They are also critical for meeting the grand challenge of reducing the ~\$7bn/yr invested in studies with irreproducible data analyses.

**More details? See BioRxiv.org:**  
<https://doi.org/10.1101/099192>

We acknowledge NSF Career Award 1149123 to L.L. for support, and many others as listed in our full report.

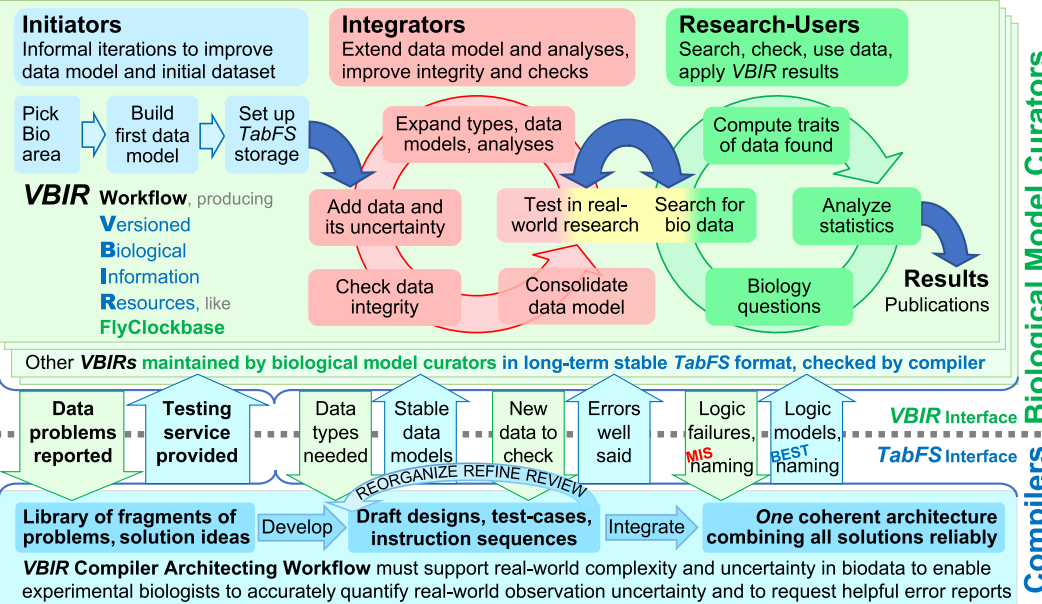

**Figure 1: Transdisciplinary workflow improving reproducibility of data analyses.** Well-curated VBIRs, like FlyClockbase, boost reproducibility and hypothesis testing speed, like genome projects. We show this by integrating into FlyClockbase 86 studies observing time series of (A) wildtype fly circadian clock molecular components, inferring (B) the peak hours of proteins PER and TIM, revealing differences in variances. (C) Our need for reducing data errors inspired compiler designs for simplifying biological model curation. We found this requires cross-disciplinary effort: real-world bioresearch must meet compiler design for inspiring the complex error checks required by (usually) imperfect biodata. We have been developing a VBIR data-format that helps biologists to capture relevant (bio) domain expertise in ways that are more accessible to experts and compilers.



## INTRODUCTION

Several grand challenges of our time, such as personalizing medicine or mapping genotypes to phenotypes, critically depend on the careful curation of biological knowledge-fragments into integrated resources of intermediate size that are easier to handle. Such resources can provide comprehensive overviews of integrated models or experimental results on a given topic. If these resources are organized well enough and are machine readable, then biological models and datasets can be explored in more automated ways and thus greatly accelerate biological discovery.

We aim to make it easier to create such intermediate resources by improving the efficiency of high-quality biological model curation. The goal of such curation work is to integrate ‘all current knowledge’ that is relevant for a research topic of reasonable complexity *while* keeping all deposited information well-organized and machine readable. This requires computational solutions that are best developed *while simultaneously* engaging deeply with the complexities of real-world biological research where results can be less than clear-cut and relevant data may be scattered across diverse sources. Curating such diffuse and scattered data can be prohibitively complicated without appropriate strategies for handling recurrent problems.

We chose the study of circadian clocks in fruit flies as our area of in-depth biological research in order to provide a real-world context for developing strategies that improve curation efficiency. While climbing onto the shoulders of giants in fly clock research, we integrated as much fly clock expertise as we could. In our opinion, a full integration is currently far beyond the scope of any single study if it is to efficiently point readers to the detailed, evidence-based evaluations of the strengths and weaknesses of a state-of-the-art fly clock model. Thus, we focused on integrating all *Drosophila melanogaster* wildtype time series observations from 25 years of research (often reported as wildtype control experiments for evaluating effects of mutants). Despite this substantial reduction of scope, our integration task is far from trivial if we aim to ensure the reproducibility, stability, and rigor of integration.

Reproducibility is pivotal for science. It also does not come easy. We aimed to increase the reproducibility of results from our research in fly clock biology while exploring strategies for simplifying reproducibility in research. Our main biological findings are differences in variances of certain time series traits that we observed between different clock components. We hypothesize that these differences hold important clues for improving our mechanistic understanding of circadian clocks. Variances are easily affected by errors that also affect reproducibility and are independent from underlying biological mechanisms. Therefore, we deem it essential to include our progress towards reproducibility in the scope of this study. We mitigate the inevitable increase of length with headings that simplify navigating its various aspects.

1           Our study contributes to the foundations of a system for integrating all expertise  
2 on the fly clock. We provide detailed experimental observations of time series ready for  
3 linking to statements in ‘big-picture’ fly clock models. We simultaneously explore how to  
4 integrate more efficiently the underpinning diffuse and scattered data. We find that such  
5 integration work is best accomplished by biological model curators with a deep  
6 biological interest in the research results that are being integrated. We also find that the  
7 efficiency of integrating and curating results can be greatly increased by access to  
8 strategies and tools designed to handle complex biological observations. We note that  
9 current computational tools repeatedly restrict representation possibilities to options that  
10 *almost* fit observed data – but not *entirely*. Such cases force model curators to  
11 inappropriately ignore data or subtly bias results by defining the closest representation  
12 as ‘good enough’. We ask if well-known data structures and logic formalisms originally  
13 developed outside of biology can appropriately capture real-world observations in  
14 biology. If not, is there merit in breaking the mold? Can economies of scale be  
15 leveraged in model curation? Abstraction is critical. If solutions are too abstract, they  
16 work everywhere – albeit poorly; if not abstract enough, they work perfectly for *one*  
17 problem – but force reinventing the wheel next time. To guide our development of  
18 computational abstractions, we find it essential to constantly face the challenging  
19 complexities of real-world experimental data as we work to advance biological research  
20 in circadian clocks of flies. This is where useful abstractions emerge naturally.

21           Accordingly, this study has three strands: (i) introduce FlyClockbase, the new  
22 resource we produced, and measure its reliability; (ii) present new biological insights on  
23 clocks in flies from analyzing data in FlyClockbase; (iii) evaluate emergent opportunities  
24 for abstraction as seen by a programming language compiler architect aiming to  
25 improve the efficiency of navigating the tension between the clear-cut logic formalisms  
26 in computers and the uncertain, incomplete and noisy biological data. We found that all  
27 three strands significantly strengthened each other. Each presents a distinct view on the  
28 integrated body of trans-disciplinary research presented here.

29  
30           **Circadian clocks** are biochemical pathways characterized by cyclical protein  
31 expression. They play a critical role in a wide variety of behavioral and physiological  
32 processes, and a better understanding of their genetic and biochemical bases could  
33 advance research in many areas (PREUSSNER AND HEYD 2016; SHARMA *et al.* 2016),  
34 including consciousness and sleep (CIRELLI 2009), feeding and metabolism (XU *et al.*  
35 2008; HURLEY *et al.* 2016), learning and memory (XU *et al.* 2008; CHOUHAN *et al.* 2015),  
36 stress and immunity (DUMBELL *et al.* 2016), inflammation (CARTER *et al.* 2016), cancer  
37 (SEPHTON AND SPIEGEL 2003; MASRI *et al.* 2015; SALAVATY 2015; MOLINA-RODRÍGUEZ AND  
38 ÁLVAREZ 2016), and psychological functioning (MCCLUNG 2013; PAREKH *et al.* 2015;  
39 COOGAN *et al.* 2016).

1           **Model organisms.** Many model organisms have been used to study circadian  
2 rhythms, including *Synechococcus elongatus*, *Neurospora crassa*, *Arabidopsis thaliana*,  
3 *Mus musculus*, and *D. melanogaster* (BELL-PEDERSEN *et al.* 2005). Each model  
4 organism presents benefits and challenges. Here we focus on *D. melanogaster*, which  
5 is known for its ease of genetic manipulation (STANEWSKY 2003; ÖZKAYA AND ROSATO  
6 2012) and its well-characterized genome (DOS SANTOS *et al.* 2015). Human circadian  
7 rhythms are certainly more complex than those of *D. melanogaster*. For example, it is  
8 not uncommon for one fly circadian clock component (e.g., *period* or *cryptochrome*) to  
9 correspond to multiple mammalian circadian clock components (e.g., *period1* and  
10 *period2*, or *cryptochrome1* and *cryptochrome2*) as reviewed elsewhere (YOUNG AND KAY  
11 2001). Despite these differences in complexity, the *D. melanogaster* clock is similar in  
12 many aspects to the mammalian clock (YOUNG AND KAY 2001; ROSATO *et al.* 2006).  
13 Insights from the fly clock have substantially contributed to understanding aspects of the  
14 mammalian clock in general and in particular related disorders such as familial  
15 advanced sleep phase syndrome (FASPS) (ROSATO *et al.* 2006), pancreatic cancer  
16 (POGUE-GEILE *et al.* 2006), and bipolar disorder (KO *et al.* 2010; McCLUNG 2013).  
17 Increased knowledge of the *D. melanogaster* circadian clock could continue to provide  
18 important information for future work in a variety of areas pertaining to the mammalian  
19 clock, including sleep disorders (WAGER-SMITH AND KAY 2000), Alzheimer's disease  
20 (LONG *et al.* 2014), and psychiatric disorders (McCLUNG 2013; ZORDAN AND SANDRELLI  
21 2015).

22  
23           **Math models.** Computer simulations of mathematical models are powerful tools  
24 for studying the dynamics of complex non-linear systems such as circadian clocks. They  
25 have been used for decades in many disciplines (KURTZ 1972; CROSBY 1973;  
26 TARANTOLA AND VALETTE 1982; ASCHER AND PETZOLD 1998; LAW AND KELTON 2000;  
27 ZEIGLER *et al.* 2000; TARANTOLA 2005; ANDERSON 2007; GILLESPIE 2007; GILLESPIE 2008;  
28 ANDERSON *et al.* 2011; KARR *et al.* 2012; MAVELLI 2012; WILKINSON 2012; ZEIGLER 2012;  
29 DISTEFANO 2013; GILLESPIE *et al.* 2013; SANGHVI *et al.* 2013; KARR *et al.* 2014; CHYLEK  
30 *et al.* 2015; KARR *et al.* 2015a). To be useful for the study of circadian clocks,  
31 mathematical models need to mirror relevant aspects of real-world clocks, which may  
32 include key mechanisms, reaction rates, and/or other parameters or traits. Models  
33 integrate the specified details to enable simulations of time series of amounts of  
34 circadian clock components that are based on the assumptions of the *in silico* model.  
35 The simulated distributions of amounts of different clock components at specified times  
36 is expected to match observable real-world time series if a model's assumptions are  
37 correct. Such simulations are facilitated by rigorous simulation algorithms that have a  
38 rich history in modeling biochemical reaction networks (KURTZ 1972; GILLESPIE 1977;  
39 ANDERSON 2007; GILLESPIE 2007; GILLESPIE 2008; ANDERSON *et al.* 2011; KARR *et al.*

1 2012; MAVELLI 2012; WILKINSON 2012; DiSTEFANO 2013; GILLESPIE *et al.* 2013; SANGHVI  
2 *et al.* 2013; KARR *et al.* 2014; CHYLEK *et al.* 2015; KARR *et al.* 2015a).

3  
4 **Estimating unknown rates from observed time series.** If the structure of a  
5 model is essentially correct but its parameter values are not, then time series observed  
6 in the real world can, in principle, be used to narrow the margins of uncertainty around  
7 poorly-known rate parameters (TARANTOLA AND VALETTE 1982; TARANTOLA 2005). Thus,  
8 access to a high-quality collection of observed time series could substantially contribute  
9 to improving the quality of biological insights gained from computational models.  
10 Mechanistic models with firm mathematical underpinnings can be used to explore  
11 hypotheses that are impractical to investigate in the laboratory for reasons that may  
12 include the effort required to produce mutants or the difficulty of measuring particular  
13 clock features experimentally (LOEWE AND HILLSTON 2008; LOEWE 2009; LOEWE 2016).  
14 By exploring potential hypotheses of interest *in silico*, models ideally inform future wet-  
15 lab experiments.

16  
17 *Biological example.* The clock component *clockwork orange (cwo)* was thought to  
18 indirectly inhibit transcription of a number of key clock genes, including *period (per)*,  
19 *PER-aryl-domain protein 1 (pdp1)*, and *vri* (KADENER *et al.* 2007; LIM *et al.* 2007),  
20 so flies with decreased *cwo* expression were expected to show increased levels of *per*,  
21 *pdp1*, and *vri*. Experimental results, however, indicated that *cwo* mutants exhibited  
22 decreased expression of these clock components (MATSUMOTO *et al.* 2007; RICHIER *et al.*  
23 2008). In an attempt to explain these results, FATHALLAH-SHAYK *et al.* (2009) created  
24 a clock model that included *cwo*. This model was able to predict the experimental  
25 results previously shown and was used to develop a novel hypothesis which described  
26 a more complex interaction between *cwo* and the rest of the clock. Rather than simply  
27 repressing a transcriptional activator, the authors of this model postulated that the  
28 interaction between weak repression by *cwo* and strong activation by the transcriptional  
29 activator led to indirect activation of a different part of the clock. This explained the  
30 experimental results from *cwo* mutants and suggested that *cwo* plays a role in reducing  
31 minor variations in the clock known as “jitters” ((FATHALLAH-SHAYKH 2010); more details  
32 (SCRIBNER AND FATHALLAH-SHAYKH 2011)). This is just one example of the powerful ways  
33 in which modeling can act as a thinking tool, helping us to understand biology better.

34 *Models and reality.* Computational models simulations models are fundamentally  
35 attempts to represent a simplified version of reality, and their utility hinges on their ability  
36 to faithfully capture the most important aspects of reality (TARANTOLA AND VALETTE 1982;  
37 TARANTOLA 2005). Complex processes with well-defined inputs and outputs are easily  
38 simplified by assuming that the timing of these processes remains essentially  
39 unchanged; then complicated sub-models of such processes can be substituted by  
40 simple transformations that merely reproduce the correct timing. If a model is to help

1 understand, describe, or predict a biological system, such simplifications must be  
2 grounded in observations and a biological understanding of the phenomena to be  
3 modeled (WOOLEY AND LIN 2005; BRODLAND 2015). For example, a model for predicting  
4 credible functions for *cwo* in the clock (FATHALLAH-SHAYKH *et al.* 2009) needed to be  
5 able to replicate previous experimental results first, before it could make useful  
6 predictions. Such work is facilitated by the simplifying assumption that transcription,  
7 translation, and degradation in clock models can be replaced by simple reactions with  
8 rates appropriately chosen to match experimental data. Thus, access to a broad array  
9 of curated, high-quality experimental observations is critical for efficiently constructing  
10 and refining computational models.

11  
12 **Reproducibility of research.** The advanced mechanistic simulations and complex  
13 statistical inference methods above are necessary for arriving at a rigorous  
14 understanding of circadian clocks. They require a complex software stack and  
15 substantial efforts to implement dedicated code, workflows, and data organization  
16 schemes. It is not easy to develop scientific computing solutions of such complexity  
17 without loss of usability or sacrificing the reproducibility of earlier results. Yet the  
18 importance of reproducibility for science is undisputed and has recently received some  
19 attention (IOANNIDIS 2005b; JASNY *et al.* 2011; HUANG AND GOTTARDO 2013; MCNUTT  
20 2014; AARTS *et al.* 2015; FREEDMAN *et al.* 2015a; ALLISON *et al.* 2016; BAKER 2016;  
21 BARBA 2016; LEWIS *et al.* 2016; STODDEN *et al.* 2016). Reproducibility is an extremely  
22 broad topic that frequently requires input from many experimental, statistical,  
23 computational, theoretical and applied disciplines to arrive at rigorous solutions (HUANG  
24 AND GOTTARDO 2013). Conducting research reproducibly requires more effort than  
25 commonly realized (DONOHO 2009; STODDEN *et al.* 2014; JAMES *et al.* 2015; LOEWE  
26 2016; MESNARD AND BARBA 2016). Yet, the steep upfront costs of entry seem to pay off:  
27 research teams with a reproducible research workflow report substantial benefits  
28 (DONOHO 2009; MESNARD AND BARBA 2016). Evaluations of computational tools Such  
29 reports inspired us to work towards improving reproducibility in our efforts. While useful  
30 recommendations and tools exist e.g. see <https://www.xsede.org/web/reproducibility>  
31 and (INCE *et al.* 2012; STODDEN *et al.* 2014; POLDRACK AND POLINE 2015; LEWIS *et al.*  
32 2016; STODDEN *et al.* 2016), there is no silver bullet and standards are still evolving. We  
33 aimed to keep computational requirements to a minimum.

34 *Firm foundations.* Here we cannot investigate the reproducibility of complex  
35 mechanistic circadian clock simulations or their underpinning parameter estimates.  
36 However, we can prepare a firm foundation for later studies. Rigorous reproducible  
37 reports of new parameter estimates need to provide many of the details reported here.  
38 This includes details on (i) literature database search strategies, (ii) initial screening  
39 processes and criteria, (iii) filtering of candidate studies and other special selection  
40 methods, (iv) reasons for combining some datasets but not others, (v) justifications for

1 approaches that handle noise, outliers, or other complications, (vi) bibliographic  
2 references, (vii) a version of all raw data before preprocessing, and (viii) a well-  
3 integrated final version of the modified data used for inference after preprocessing.  
4 Ideally, such a study would include additional analyses like (ix) a human error analysis  
5 providing estimates of some low-level error rates quantifying the quality of internal raw  
6 data handling, (x) an error analysis and justifiable correction strategies for errors  
7 inherent to the raw data as received by this study, (xi) some high-level summary  
8 statistics description of the observed data, (xii) justifications and results from conducting  
9 various reasonable consistency checks, (xiii) reviews of reasonable biological  
10 interpretations of typical observations, outliers, or other patterns of interest, (xiv) critical  
11 assessments summarizing sufficient biological and other context to help readers  
12 evaluate thoroughly, skeptically, and efficiently how much trust is justified by the quality  
13 of the best and most complete dataset in this study, and (xv) any other potential  
14 limitations. Since circadian clocks in flies have been an active area of research for some  
15 time, a substantial number of studies report time series of potential interest. Time series  
16 of clock components are foundational for understanding circadian clocks. Appropriately  
17 integrating them raises various subtle issues that require decisions in order to build a  
18 strong foundation for further studies. We initially underestimated the complexity of  
19 dealing with their combined impact on the reproducibility of a steep data processing  
20 pyramid that aims to eventually integrate parameter estimation and biologically  
21 reasonable fly clock model ensembles. Since later steps such as parameter estimation  
22 cannot correct quality problems at earlier steps, we decided to dedicate this study to  
23 ensuring the availability of a durable high-quality set of time series observations ready  
24 to serve beyond this study. Such efforts rival the complexity of wet-lab experiments,  
25 except that they occur in a dry lab. The substantial investments in manual curation of  
26 high quality datasets are thus justified by the well-known GIGO principle that applies to  
27 simulations and experiments alike (Garbage In, Garbage Out). We next present some  
28 background on questions of basic reproducibility and data quality that arise for  
29 integration efforts at the scale of our study.

30 *Problems with label reproducibility.* Irreproducibility can be caused by seemingly  
31 trivial errors while executing deceptively simple work, such as pipetting errors (BROMAN  
32 *et al.* 2015) or (mis)labeling a line of descent in the lab (LORSCH *et al.* 2014; FREEDMAN  
33 *et al.* 2015b). Assigning sequence annotations in GeneOntology databases is neither  
34 trivial nor always correct (JONES *et al.* 2007); incorrect assignments can replicate via  
35 uninformed users and can also be generated easily by using spreadsheets with  
36 inappropriate auto-conversion (ZEEBERG *et al.* 2004; ZIEMANN *et al.* 2016). Activities like  
37 labeling or pipetting in array shaped micro-titer plates appear simple, but their simplicity  
38 is deceptive because they involve naming – an often-underestimated problem of  
39 extremely varying complexity (LOEWE 2016). The stakes are high and have led to calls  
40 for systematically improving research at the bench and beyond (COLLINS AND TABAK

1 2014; LORSCH *et al.* 2014; ALLISON *et al.* 2016). The impact of these problems on our  
2 study is immediate. We have little choice but to start with the assumption that *all errors*  
3 *had been corrected* by the time of publication, implying correctness of all name-related  
4 operations of all researchers involved in the production of the over 400 time series we  
5 report below. Time of publication matters, as authors and readers might struggle to get  
6 errors corrected if found later (ALLISON *et al.* 2016). The list of implications is long: no  
7 accidental swaps anywhere, neither in any fly strain used throughout its relevant history  
8 of descent, nor in the vials of final experiments, nor in the raw data, nor in averaging  
9 repeated observations, nor in labeling the final plots for publication. We appreciate that  
10 every single team of authors did their best to ensure that all errors were corrected in the  
11 final publication. Also, label-errors in published time series of clock components are  
12 probably less frequent than extrapolations of single-person initial error rates might  
13 suggest (assuming scrutiny from co-authors and peer review). However, human error  
14 analyses performed over decades in very diverse disciplines and for tasks of varying  
15 complexity have quantified in numerous experiments that “*to err is human*” (PANKO  
16 2016). Measured error rates observed in one type of experiment do not easily transfer  
17 to other contexts, but the existence of labeling errors in labs is well documented  
18 (LORSCH *et al.* 2014; BROMAN *et al.* 2015). Thus, it would be surprising if not a single  
19 error existed in the published time series data we integrated. Equally, it would be  
20 surprising if such a complex set of diffuse and scattered data could be integrated  
21 without adding a single error from data handling. These observations highlight the  
22 importance of assessing error rates and providing a defined protocol for reducing data  
23 handling errors. Thus, high-quality data curation requires (in reverse order) mature  
24 strategies for efficiently

- 25 • monitoring and handling all relevant error types,
- 26 • defining data structures that enable true data integration (and efficient querying)
- 27 • collecting all relevant scattered data in one place (and pre-sort for integration).

28 All this requires substantial efforts and biological model curators could probably learn  
29 from the substantial methodologies for human error analysis that have been developed  
30 elsewhere (NASA *et al.* 2006-07; NASA *et al.* 2011). Some of these approaches are too  
31 complex for the application to individual studies in biology. However, meta-analyses  
32 aiming to draw conclusions from noisy biological data need to find a way of handling the  
33 errors that occur during data handling. They also have to address reproducibility in the  
34 domain of statistics.

35 *Statistical reproducibility.* A substantial fraction of recent problems with  
36 reproducibility is caused by a lack of statistical reproducibility (AARTS *et al.* 2015;  
37 HALSEY *et al.* 2015; STODDEN 2015). These problems easily arise while designing  
38 experiments or analyzing data without the necessary statistical background (SALSBURG  
39 1985; VAUX 2012). Here, interpretations of ‘necessary’ are the subject of much  
40 discussion (STERNE 2003; CUMMING 2013; SHARPE 2013; LEEK AND PENG 2015) as

1 guidelines on statistical best practices are being updated (ALTMAN *et al.* 1983; MILLIS  
2 2003; PLOWMAN 2008; MAZUMDAR *et al.* 2010; CUMMING 2013; DRUMMOND AND VOWLER  
3 2013; JOHNSON 2013; CUMMING 2014; HUANG *et al.* 2015; SAVALEI AND DUNN 2015;  
4 TRAFIMOW AND MARKS 2015; WOOLSTON 2015; TARONI *et al.* 2016; WASSERSTEIN AND  
5 LAZAR 2016), but not necessarily followed everywhere (LEW 2012; TRESSOLDI *et al.*  
6 2013). For example, a short-sighted over-reliance on  $P$ -values easily generates  
7 irreproducible or misleading results (LEW 2012; CUMMING 2013; NUZZO 2014; HALSEY *et al.*  
8 2015; LEEK AND PENG 2015), a criticism with history (LOFTUS 1993; STERNE 2003).  
9 Briefly,  $P$ -values are the probability that an observation can be explained by a given  
10 null-hypothesis, which usually represents the ‘most boring explanation’. Thus,  $P$ -values  
11 are often seen as ‘null-hypothesis significance tests’, but they do not make any  
12 statements about alternative hypotheses, of which there could be many. Yet  
13 researchers often use  $P$ -values to draw unsafe conclusions of deceptive simplicity about  
14 their respective favorite alternative hypotheses (LEW 2012; TRESSOLDI *et al.* 2013). They  
15 do so with such regularity that this error’s pervasiveness might one day motivate a  
16 fascinating human error analysis.  $P$ -values may offer substantial attractions as they  
17 combine the apparent reassurance of a precise number, the obvious simplicity of a  
18 single dimension, and the clear choice between a boring and a seemingly interesting  
19 option. In comparison, careful time-consuming analyses might be less appealing as they  
20 often reveal complex ensembles of less-than-clear-cut alternatives in a world of multi-  
21 dimensional trade-offs, requiring qualitative reasoning to decide which quantitative  
22 methods to use for producing precise numbers. Such analyses offer more nuance,  
23 albeit at greater cost and require more expertise in advanced statistics (WILCOX 2012),  
24 and aspects of type systems (PIERCE 2002), semantics, and naming (LOEWE 2016).  
25 These complex analyses underscore a conclusion that is intuitively well understood:  
26 biology does not present itself in a black and white picture of only interesting or boring  
27 parts. Instead it offers not only shades (allowing for gradients in addition to cutoffs at  
28 significance thresholds), but also colors (additional dimensions that otherwise might be  
29 inappropriately collapsed into a single dimension). The recent interest in statistical  
30 reproducibility has produced guidelines that recommend a closer look at some of these  
31 additional dimensions by estimating confidence intervals and other measures instead of  
32 testing arbitrary significance thresholds (KILLEEN 2005; NAKAGAWA AND CUTHILL 2007;  
33 CURRAN-EVERETT 2009; CUMMING 2013; CUMMING 2014; DEMIDENKO 2016). This does  
34 not mean that  $P$ -values have no merit (MURTAUGH 2014; STANTON-GEDDES *et al.* 2014)  
35 and hence a pragmatic approach might be most appropriate (BOOS AND STEFANSKI  
36 2011), if the high variability of  $P$ -values is accounted for (HALSEY *et al.* 2015). In either  
37 case, close attention to the robustness of statistical methods is warranted (WILCOX  
38 2012), and any statistical conclusions should be supported by some analysis of their  
39 statistical reproducibility (HALSEY *et al.* 2015). Finally, showing more raw data is  
40 preferable (LOFTUS 1993; DRUMMOND AND VOWLER 2011).



1            **Statistical error iceberg.** Recent interest in statistical reproducibility has drawn  
2 attention to other aspects of statistical analysis workflows. In this context, *P*-values have  
3 been described as the tip of the iceberg (LEEK AND PENG 2015). To arrive at fully  
4 rigorous conclusions requires investigating numerous detailed decisions about which  
5 data to include, which outliers to remove, which tests to use, and which simplifying  
6 assumptions to employ. Such analyses are more complex to produce and read, but they  
7 are currently essential for exploring the most efficient approaches for arriving at reliable  
8 statistical results. The fundamental nature of time series data for understanding clocks  
9 in flies motivated us to invest in corresponding statistical reliability. Therefore, we  
10 explore below several alternative ways to construct the statistical analysis pipeline for  
11 this study.

12  
13            **Reproducibility in genetics.** The recent surge of interest in reproducibility has  
14 resulted in a number of studies of additional relevance to FlyClockbase. For example,  
15 the reproducibility of genotype-phenotype associations has been investigated (NCI-  
16 NHGRI WORKING GROUP ON REPLICATION IN ASSOCIATION STUDIES *et al.* 2007; IOANNIDIS  
17 *et al.* 2009b; JANSSENS *et al.* 2009; KRAFT *et al.* 2009). Analysis of gene expression are  
18 an important tool of genetic analysis and have therefore seen substantial standardizing  
19 efforts (BAMMLER *et al.* 2005). Analysis of standardized and non-standardized  
20 measurements have found improved reproducibility when standardized experimental  
21 protocols were used (BAMMLER *et al.* 2005). For independent studies collected from the  
22 literature, repeatability of microarray gene expression analyses has met limited success  
23 (IOANNIDIS *et al.* 2009a). Reasons for failure included the unavailability of data,  
24 incomplete annotations, and missing documentation on data processing (IOANNIDIS *et al.*  
25 2009a). Other relevant observations that can hamper reproducibility include pipetting  
26 errors (BROMAN *et al.* 2015) and pedigree errors (BROMAN 1999).

27  
28            **Versioned Biological Information Resources (VBIRs).** The importance of  
29 biological information resources is undisputed and has motivated the construction of  
30 hundreds of heterogeneous resources as reviewed elsewhere (BROOKSBANK *et al.* 2005;  
31 NG *et al.* 2006; LAIBE AND LE NOVERE 2007; WIERLING *et al.* 2007; VAN GEND AND SNOEP  
32 2008; SULLIVAN *et al.* 2010; DRAGER AND PALSSON 2014; NAJAFI *et al.* 2014). Sizes vary,  
33 as do scope and topics ranging from general (e.g. <https://datascience.nih.gov/commons>  
34 ; <https://kbase.us> ), to organism specific (e.g. <http://flybase.org> organized around  
35 *Drosophila* genomes (GRAMATES *et al.* 2016; MARYGOLD *et al.* 2016)), modeling specific  
36 (LE NOVERE *et al.* 2006; CHELLIAH *et al.* 2015), approach specific (CUSICK *et al.* 2009),  
37 and down to pathway or molecule specific resources (e.g. ClotBase (SONAWANI *et al.*  
38 2010) or SwissLipids (AIMO *et al.* 2015)). Their heterogeneity remains a challenge and  
39 motivated development of the FAIR Principles (WILKINSON *et al.* 2016). The FAIR  
40 Principles were designed for evaluating credible solutions for the problem of exchanging  
41 data in biology and emphasize important principles that make data sharing FAIR and

1 data Findable, Accessible, Interoperable, and Reusable (WILKINSON *et al.* 2016). The  
2 FAIR Principles do not aim to provide any standards or implementations, but leave the  
3 actual development of solutions to others, such as the proposed standard for Minimal  
4 Information Requested In the Annotation of biochemical Models (MIRIAM) (LAIBE AND LE  
5 NOVERE 2007), Brief, Explicit, Summarizing, Technical (BEST) Names (LOEWE 2016),  
6 and the many proposals reviewed elsewhere (DRAGER AND PALSSON 2014). Overall  
7 solutions will need to solve the extraordinarily difficult challenge of data integration  
8 (DOAN *et al.* 2012). Accordingly, efforts to exchange detailed data more efficiently in  
9 these complex contexts have become top priorities in biological research contexts (NIH  
10 *et al.* 2012; DRAGER AND PALSSON 2014; NIH 2015; NIH 2016; WILKINSON *et al.* 2016).

11 *Importance of versioned data integrators.* Versioned interoperable information  
12 resources of intermediate size are likely to play a permanent role as hubs of integration  
13 for the biological expertise in an area. The versioning is important to enable users to  
14 access a stable state of information, without the unrealistic demand that these  
15 resources have reached their final stage of development. Any *VBIR* worth developing  
16 will likely be updated and improved for an extended period of time. While rates of such  
17 change are likely to vary substantially, none of these changes should imperil the  
18 reproducibility of some result that is based on the earlier state of the resourced as  
19 accessed by the authors of that result. How to achieve interoperable long-term stable  
20 versioning that is flexible enough to accommodate the broad range of needs of  
21 resources as heterogeneous as *VBIRs* is an open question for research in the  
22 semantics of naming. Currently, innumerable, incompatible, and inconsistent versioning  
23 systems are actively used by numerous projects. Integrating them without reflection  
24 would create a system that is almost incomprehensible and inflict on users intolerable  
25 amounts of inessential complexity. Experience has shown that such a complex system  
26 would be very brittle and would jeopardize reproducibility by its complexity. However,  
27 the value of consistent easily reproducible integration is in the quality to which usable  
28 resources offer expert curated relevant data that is continuously updated. Updates  
29 could be triggered by detecting errors or integrating future experiments, possibly  
30 expanding scope or precision through improved data models (but always increasing  
31 some versioning number). Managing such updating processes works best for *VBIRs* of  
32 some intermediate size. Thus, *VBIRs* size is defined at the lower end by exceeding the  
33 limited scope of single publications, reviews, or meta-analyses that are all frozen in time  
34 once completed. At their typical size, *VBIRs* enable the functional, ongoing integration  
35 of information evaluating multiple studies and reviews from the perspective of a well-  
36 defined scope. At the upper end, *VBIRs* generally remain at a much lower complexity  
37 than grand challenges, and thereby avoid many additional complications caused by  
38 their excessive complexity. This intermediate size and their stability enables *VBIR* to act  
39 as reliable building blocks for accumulating biological expertise and address existing  
40 grand challenges more efficiently.

1           *Flexibility of VBIRs.* These minimal constraints allow *VBIRs* to take on a great  
2 diversity of organizational forms and the size of their scope may vary widely. However,  
3 not all biological information resources currently perceived as useful do satisfy these  
4 requirements. For example, not all repositories and databases in biology that aim to  
5 continually integrate information provide reliable access to clearly defined states in the  
6 past that are easy to access and to cite. Traditionally, the biological information  
7 resources that are easiest to cite are journal articles, but these do not usually provide  
8 information in a form that is structured enough for further processing and they do not  
9 usually update information (ALLISON *et al.* 2016). Some authors complement their  
10 articles with online databases or more static resources that can contain valuable  
11 material. However, the lack of standards and tools that are easy to use means that such  
12 efforts usually require substantial programming and data science expertise when they  
13 are set up and when they are to be maintained. Such barriers of entry make it very  
14 difficult for non-programming biologists with interesting datasets to set up and publish a  
15 *VBIR* in a form that facilitates further data integration.

16           *Database integration* is a special case of data integration. Both are enormous  
17 general challenges, whenever non-trivial datasets are to be used together (DOAN *et al.*  
18 2012). For example, a substantial research collaboration worked towards integrating  
19 data scattered across 81 geospatial temporal ecology datasets from 7 provider types in  
20 an effort to build LAGOS, the LAke multi-scaled GeOSpatial & temporal database  
21 (SORANNO *et al.* 2015). The substantial supporting online material of the initial LAGOS  
22 description (SORANNO *et al.* 2015) provides an impression of the numerous data-  
23 handling and type system synchronization challenges the LAGOS team had to face in  
24 order to obtain some state of data integration (see  
25 [http://csilimno.cse.msu.edu/lagos\\_status.php](http://csilimno.cse.msu.edu/lagos_status.php) for updates).

26           *Cochrane reviews* provide a completely different approach to data integration. To  
27 reduce arbitrary bias that easily arises in more limited non-systematic reviews,  
28 <http://www.cochranelibrary.com> aims to stimulate the use of systematic methods for  
29 finding and integrating all peer-reviewed information about a given topic. The resulting  
30 retrospective and prospective meta-analyses have substantially advanced the  
31 integration of biomedical observations. Ongoing development of methodologies for  
32 systematic bias reduction has greatly increased awareness and approaches available  
33 for reducing the influence of important biasing factors (THARYAN 1998; ADES *et al.* 2008;  
34 MCKENZIE *et al.* 2013; DOI 2014; ONITILLO 2014; DEBRAY *et al.* 2015; EFTHIMIOU *et al.*  
35 2016). This success does not imply that further improvements are impossible; there are  
36 biases that are notoriously difficult to address, such as certain types of ascertainment  
37 bias (AMOS *et al.* 2003; CLARK *et al.* 2005; LACHANCE AND TISHKOFF 2013; MINIKEL *et al.*  
38 2014) and biases against the publication of negative results (JOHNSON AND DICKERSIN  
39 2007). In fact, it can be argued that biases are almost everywhere (e.g.: IOANNIDIS  
40 2005a; PATIL *et al.* 2015). Thus, quantifying biases and analyzing their impact

1 appropriately may be more important than demanding their absence. Cochrane reviews  
2 are not VBIRs, because traditional publications cannot be updated regularly. If VBIRs  
3 could be published easily, without the currently required database programming  
4 overheads, then Cochrane reviews with a reasonably well-defined data model could in  
5 principle become VBIRs.

### 7 **Genome projects as a model for VBIRs development on a broader scale.**

8 *VBIRs* increase the speed of hypothesis testing and greatly add to the long-term value  
9 of properly annotated wet-lab data. They offer the raw material for diverse meta-  
10 analyses, opening up entirely new research perspectives. In this respect, *VBIRs* mirror  
11 similar efficiencies known from genome projects. The similarities do not end here.  
12 *VBIRs* development also shows similar strong dependencies on software and data  
13 organization. Genome projects demonstrated efficiencies of scale by separating data  
14 collection and various stages of data interpretation (LANDER *et al.* 2001; VENTER *et al.*  
15 2001). The efficiency of post-genomic sequencing workflows critically depends on the  
16 development of appropriate data structures, processing tools and exchange protocols  
17 (WILKINSON *et al.* 2016). We expect similar boosts to efficiency from developing *VBIR*-  
18 tools. For example, they could support more biology-friendly data structures to increase  
19 the efficiency and precision of integrating inherently imprecise biological observations.  
20 They could also greatly accelerate the adoption of sophisticated statistical analysis by  
21 the biological community, simply by implementing the appropriate statistical methods  
22 into the corresponding automated workflows. This would reduce problems of confusing  
23 SD and SEM (SALSBURG 1985), and opens up a new avenue for communicating  
24 recommended best practice for statistical analyses, that could be provided right next to  
25 a user-friendly implementation (MAZUMDAR *et al.* 2010; SHARPE 2013).

26 *Genome projects have revolutionized biology.* Here we want to explore whether  
27 efficiencies of scale in biological model curation organized in a *VBIRs* project might hold  
28 a similar potential for accelerating the pace of biological discovery. The success of  
29 genome projects and other targeted efforts has been built on efficiently organizing and  
30 exchanging new data and interpretations (WILKINSON *et al.* 2016). For *VBIRs*  
31 exchanging data is more complicated, because their data is more structured and more  
32 diverse than typical genome data. Accordingly, efforts to exchange details data more  
33 efficiently in these complex contexts have become top priorities (NIH *et al.* 2012;  
34 DRAGER AND PALSSON 2014; NIH 2015; NIH 2016; WILKINSON *et al.* 2016). Such work is  
35 essential for progress towards meeting increasingly complex grand challenges like  
36 personalizing medicine, constructing genotype-phenotype-maps, or predicting how  
37 cancer cell populations evolve using mechanistic models in evolutionary systems  
38 biology (LOEWE 2016). By definition, these grand challenges all exceed the problem-  
39 solving skills of any single research unit, and therefore critically depend on the efficient  
40 communication of the latest progress. This progress could be captured in high-quality

1 *VBIRs* that probably will bring the same efficiency benefits as genome projects, once  
2 corresponding tools become available for dealing with their more diverse data types.

3  
4 **Importance of biological model curation.** None of the benefits above can be  
5 realized without substantial human input in the form of biological model curation.  
6 Despite many advances in machine learning, the gold standard for data curation is still  
7 the eye of a domain expert. While machines are extraordinary in exploiting regular  
8 patterns, it has been difficult to teach machines how to correctly handle the many  
9 exceptions that are readily recognized by human experts as deviations from ‘common  
10 sense’ (BURKHARDT *et al.* 2006; SALIMI AND VITA 2006). Biological model curation by itself  
11 is not new. In fact, one could argue that very essence of research is the construction  
12 and curation of biological expertise that could also be described as a model. Thus, the  
13 curation of biological information is at least as old as Linnaean taxonomy (LINNÉ 1758).  
14 None of the recent resources that systems biology depends on could have been put  
15 together without substantial model curation efforts (see e.g. DRAGER AND PALSSON  
16 2014). The work of biological model curators, or biocurators, has only recently come  
17 into focus as an increasingly important avenue of biological research (BOURNE AND  
18 MCENTYRE 2006; BURKHARDT *et al.* 2006; SALIMI AND VITA 2006; HOWE *et al.* 2008; ST  
19 PIERRE AND MCQUILTON 2009; BATEMAN 2010; BURGE *et al.* 2012; HIRSCHMAN *et al.* 2012;  
20 ZHANG *et al.* 2014b; MITCHELL *et al.* 2015; ORCHARD AND HERMIAKOB 2015; RODRIGUEZ-  
21 ESTEBAN 2015; GIBSON *et al.* 2016; KIM *et al.* 2016; REISER *et al.* 2016; SINGHAL *et al.*  
22 2016). By now biocurators have an international society ( <http://biocuration.org> ) and an  
23 official journal ( <http://database.oxfordjournals.org> ). Funding for digital depositories in  
24 biology has historically been complicated because few have realized the essential  
25 contributions of biological model curators to the overall scientific enterprise. This  
26 problem has been recognized and efforts are underway to address this discrepancy  
27 (EMBER *et al.* 2013). One potential contribution to these efforts could be to find a way  
28 that substantially reduces the cost of initiating, growing, and maintaining *VBIRs*. We  
29 explore a potential approach for simplifying model curation by exploiting advances in  
30 computer science that have greatly simplified the design and construction of compilers  
31 for new programming languages.

32  
33 **How a compiler could help in biological model curation.** Programing  
34 language compilers are extraordinary efficient tools for guaranteeing that a given  
35 collection of texts (source code) conform to a well-defined standard (the compiler’s  
36 language) and are transformed into output that is guaranteed to conform to strict rules.  
37 The construction of compilers requires an advanced understanding of computer  
38 science, but decades of research have produced a substantial body of data structures,  
39 algorithms, and tools that greatly simplify the construction of compilers today (e.g.  
40 COOPER 2012; GRUNE 2012). Thus, the question today is not if a compiler can be

1 constructed for a given language, but rather what should a language look like for which  
2 it is worth constructing a compiler. After the construction of uncounted programming  
3 languages each with their own strengths and weaknesses, rather compelling reasons  
4 are necessary for creating a new one and any such efforts should learn from the diverse  
5 shortcomings of their many predecessors (MANDRIOLI AND PRADELLA 2015). Traditional  
6 approaches to designing new programming languages have not included the very large  
7 amounts of feedback from research biologists that are necessary for creating a  
8 language design that could efficiently support biologists in their work (LOEWE 2016).

9 *Enforce best practices.* For example, such a compiler could greatly reduce the  
10 confusion between SD and SEM that has plagued the reporting of biological results for  
11 some time (SALSBURG 1985). A compiler that implements the latest statistical testing  
12 methods could greatly improve the adoption of statistical best practices in the biological  
13 research community (MAZUMDAR *et al.* 2010; SHARPE 2013). Such a compiler could also  
14 advance standards for facilitating interoperability in systems biology (DRAGER AND  
15 PALSSON 2014) and thereby contribute towards solving the extraordinarily difficult  
16 challenge of data integration (DOAN *et al.* 2012), improve the semantic reproducibility of  
17 biological data (LOEWE 2016), facilitate the sharing of meaningful data based on the  
18 FAIR Principles (WILKINSON *et al.* 2016), and encourage biologists to provide the  
19 Minimal Information Requested In the Annotation of biochemical Models (MIRIAM)  
20 (LAIBE AND LE NOVERE 2007). VBIRs construction does not require the existence of such  
21 a compiler, as every task can also be performed manually. Manual work is slower, but  
22 also more flexible, and can therefore better attend to the needs of high-quality biological  
23 model curation of a given data set. If such curation work is combined with the  
24 perspective of a compiler architect, then it provides extraordinary opportunities for  
25 designing efficient abstractions for data structures and tasks that can later be supported  
26 by a fully automated compiler.

27 *Efficiencies of scale.* Many VBIRs are likely to have similar needs that can be  
28 served by the same compiler if they share a standard for storing data. Thus, the costs of  
29 compiler development can then benefit several VBIRs where they reduce the cost of  
30 VBIR development and maintenance, which have been difficult to fund (EMBER *et al.*  
31 2013). Compiler development is also an excellent opportunity for detecting problems in  
32 logic formalisms; such errors have the potential for causing exorbitant costs (e.g. HOARE  
33 2009; KAMP 2011; LOEWE 2016). Therefore, constructing such a compiler could already  
34 be a cost-effective decision for the longer-term development and maintenance of a  
35 single VBIR alone. We aim to observe during our biological research where commonly  
36 used logic formalisms made it more complicated to accurately represent biological  
37 observations with their usual uncertainty. Representing uncertain biological data in  
38 computational structures is a sufficiently frequent problem to cause substantial  
39 frustration in efforts towards curating biological models at a reasonably high quality.

40

1           **Opportunity.** Our systematic study of circadian clock gene expression patterns  
2 offers intriguing opportunities for engaging with the timely questions of reliable data  
3 handling, control experiment repeatability, human error analysis, reproducible  
4 computing, statistical reproducibility, and the semantic reproducibility of source code in  
5 research computing. These questions might be easy to dismiss at first sight, but as  
6 discussed above, in the broader context of growing data sets in VBIRs, low rates of  
7 diverse and individually rare errors can combine into a pervasive fog of confusion that  
8 can render a valuable collection of scientific results unusable. Usually these problems  
9 cannot be investigated at the level of a single experimental study, but this does not  
10 imply that errors in VBIRs are rare, or without consequence (e.g. see (ZEEBERG *et al.*  
11 2004; JONES *et al.* 2007; SCHNOES *et al.* 2009)). The resulting irreproducibility is not  
12 cheap. For example, non-clinical biomedical studies with an estimated cost of about  
13 \$7Bn/yr throughout the US come with difficulties in data analysis and reporting that  
14 hamper their reproducibility (FREEDMAN *et al.* 2015a). Pervasive biases in biological  
15 datasets (IOANNIDIS 2005a) and statistical difficulties that can lead to substantially wrong  
16 conclusions (IOANNIDIS 2005b) can interfere with scientific discovery. To address these  
17 problems, it is important to invest in efforts towards opening science (BARTLING AND  
18 FRIESIKE 2014), sharing data (PACKER 2016; WILKINSON *et al.* 2016), and improving  
19 reproducibility in various areas (IOANNIDIS 2005b; DONOHO 2009; HUANG AND GOTTARDO  
20 2013; LOEWE AND KEEL 2014; STODDEN *et al.* 2014; FREEDMAN *et al.* 2015a; JAMES *et al.*  
21 2015; STODDEN 2015; BARBA 2016; LOEWE 2016; LOEWE *et al.* 2016; LOEWE *et al.* 2017).  
22 Reproducibility frameworks greatly facilitate individual scientific research studies, but  
23 take much more effort to put into place than could possibly be expected of the  
24 investigators in any individual study. Therefore, it is important to find efficient ways to  
25 achieve these goals at institutional and national scales (NIH *et al.* 2012; NIH 2015; NIH  
26 2016). Our study is different from many typical studies in that we have attempted to  
27 simultaneously conduct high quality research while working towards a framework for  
28 improving reproducibility.

29  
30           **Purpose of this study.** Here we interweave several perspectives integral to one  
31 body of trans-disciplinary research. We aim to improve amount and quality of  
32 experimental time series available for parameter estimation in mechanistic simulations  
33 along with our overall understanding of *D. melanogaster* circadian clock models. To this  
34 end we present FlyClockbase, a new carefully curated biological information resource  
35 designed to maximize accessibility and ease of use for experimental biologists and  
36 modelers. We show how to use it for testing hypotheses and report our own new  
37 findings about the variability of peak times in the clock. Finally, we make trans-  
38 disciplinary observations at the interface of experimental biology, data curation,  
39 reproducibility, and the applicability of logic formalisms in biology. We present our  
40 process for working towards constructing a compiler that would substantially reduce the

1 effort required for developing and maintaining data resources like FlyClockbase. These  
2 perspectives are next explained in a more detailed overview.

3 *Formal organization of Versioned Biological Information Resources (VBIRs).*

4 FlyClockbase is a VBIR. VBIRs store biological information using controlled immutable  
5 versioning numbers for marking each publicly released variant of the resource to ensure  
6 that previously released data remains accessible under that number. As we developed  
7 FlyClockbase, we aimed to separate the special from the general VBIR aspects to help  
8 make our design more applicable to the development of future VBIRs. Below we  
9 discuss why more VBIRs are needed. For ease of use, quality control, and future  
10 maintainability, we designed FlyClockbase as a file-based data resource that follows a  
11 well-defined scheme for collecting tables in text files grouped in folders. This  
12 organization as a set of tables is conceptually similar to the structure of a relational  
13 database, albeit without the speed, rule enforcement, and other amenities provided by  
14 modern database systems. As a result, our approach maximizes flexibility and  
15 openness, while minimizing certain types of administrative and long-term maintenance  
16 costs (to increase chances of long-term survival; see Discussion). The resulting system  
17 is even more general than VBIRs and we nicknamed it 'TabFS'. The name TabFS  
18 highlights the central role of tabs (for delimiting), table-files (for storing) and the file-  
19 system (for organizing data). To simplify the implementation of other VBIRs, we have  
20 been separating the specific details of implementing FlyClockbase from general abstract  
21 features. In TabFS we aim to capture the abstractions and rules required for  
22 implementing VBIRs with a long-term view to developing a reliable VBIR standard. Our  
23 goal is to provide the simplest and most efficient organization possible without  
24 sacrificing the flexibility curators need for defining new data types that represent diverse  
25 types of complex and uncertain biological observations. Efficiently integrating new  
26 datasets in FlyClockbase requires this flexibility. It facilitates focusing on clock biology  
27 and minimizes distractions from defining or decoding data types. This approach enables  
28 FlyClockbase to integrate a diverse array of wildtype and wildtype-like time series along  
29 with the attributes necessary for documenting a broad range of experimental details.  
30 Each time series records the relative amount of a clock component as observed at  
31 various points in time.

32 *Data integrated by curation.* In FlyClockbase we provide a curated overview of 25  
33 years of published observations of *D. melanogaster* clock components, which we use  
34 for retrospective meta-analyses. The types of molecules reported in FlyClockbase are  
35 based on the biological *D. melanogaster* clock model we abstracted from the relevant  
36 literature (see Table 1 for brief descriptions of core clock components). FlyClockbase  
37 contains more than 400 time series curated from the wildtype control experiments of 86  
38 circadian clock studies. They can be compared in many ways within or between clock  
39 components for testing diverse hypotheses of potential interest for fly clock research.



1            *Hypothesis tested: biological variability.* We use FlyClockbase for comparing the  
2 variance of times at which the circadian mRNAs and proteins *period* (*per*) and *timeless*  
3 (*tim*) reach their relative daily peak and valley. We find significant differences in  
4 variance that are not easily explained as a statistical fluke and survived several rounds  
5 of in-depth error checking (which led to interesting conclusions in their own right). Thus,  
6 we hypothesize that the larger variance of peak times for the protein PER in comparison  
7 to TIM might have mechanistic reasons that could help illuminate interesting aspects of  
8 the clock if recovered in mechanistic models.

9            *Hypothesis tested: observation method.* The confluence of many diverse  
10 independently observed time series in FlyClockbase provides a unique resource for  
11 understanding such variability of fly clocks in a broad range of settings, as documented  
12 in the attributes of FlyClockbase time series. This variability can also be used for  
13 comparing the reproducibility of different approaches to measuring time series. We  
14 compared time series measured by PCR based methods (qPCR, RT-PCR) with  
15 methods that do not include self-replication (Northern Blot, RNase Protection Assay).  
16 The variability of PCR-based time series in FlyClockbase exceeds that of non-PCR  
17 based methods; though originally surprising, this is consistent with both the exponential  
18 nature of amplification in PCR and previous reports on the reproducibility of quantitative  
19 measurements from PCR-based methods.

20            *Human error analysis.* We measured human error rates for a given set of tasks in  
21 FlyClockbase. Our results are broadly comparable to previous observations. The  
22 findings suggest that VBIRs would benefit from developing methods for ensuring that  
23 scientific conclusions are not affected by human errors that inevitably occur when  
24 handling or analyzing data and corrupt content or type. Designing a formal type system  
25 capturing relevant expert insights for FlyClockbase could facilitate and ultimately  
26 automate searches for logical inconsistencies.

27            *Compiler logic design.* We developed FlyClockbase while simultaneously  
28 exploring design options for programming language compilers that could help construct  
29 and maintain VBIRs. We have identified numerous pivotal features for supporting the  
30 long-term stability of FlyClockbase that are most efficiently implemented by a  
31 correspondingly designed compiler. We discuss how these and other practical aspects  
32 of working with VBIRs can improve the usefulness and chances of longer-term survival  
33 for VBIRs. We use an analogy to well-known results from population genetics to  
34 illustrate what the future might hold for a newly-born VBIR, such as FlyClockbase.  
35 These considerations show that cumulative practical impacts from many small  
36 complications or innovations can be unexpectedly large. We illustrate using  
37 FlyClockbase how it can be difficult to represent uncertain biological data in the  
38 certainty-demanding logic formalisms of the data types commonly used in  
39 computational tools. Most of the data types we need in FlyClockbase fall into two  
40 categories. Some are very general data types that are very common and thus ideally

1 designed for interoperability (e.g. bibliographic references, tables, etc., see TabFS).  
2 Other data types are specific to FlyClockbase and therefore are not reusable. These  
3 types need to be defined by those expert biologists who curate FlyClockbase, and best  
4 understand the relevant biology. To facilitate these discussions, we developed a trans-  
5 disciplinary collaboration model to help with the necessary communication of biological  
6 curators with a compiler architect, who needs to be capable of bridging biology and  
7 aspects of designing compiler logic. If such a communication approach is used by a  
8 compiler architect for informing important decisions about the relevant logic formalisms  
9 to be implemented, then our observations suggest that the efficiency of biological model  
10 curation could greatly increase once a user-friendly *VBIR* compiler becomes available.  
11 Such a compiler will empower biological model curators to define their own data types  
12 that can be shaped to more appropriately representing the uncertainty of the biological  
13 observations they curate – without violating biological or computer science logic. Such  
14 compilers will also allow biologists to define their own consistency checks, which can  
15 then be automatically maintained by a correspondingly designed compiler. If this  
16 compiler also implements sufficiently reviewed standards for interoperability and data  
17 exchange, biological research will benefit from an unprecedented ability to combine  
18 models and analyses from different VBIRs.

19 *Importance of efficient biological model curation.* Our work highlights why topic-  
20 specific VBIRs like FlyClockbase have an essential, irreplaceable role to play in  
21 biological research – once curated to high quality by expert biologists. As we illustrate in  
22 FlyClockbase, VBIRs increase the speed of hypothesis testing and greatly add to the  
23 long-term value of properly annotated wet-lab data. They offer the raw material for  
24 diverse meta-analyses, opening up entirely new research perspectives. In this respect,  
25 VBIRs mirror similar efficiencies previously observed in genome projects. Our trans-  
26 disciplinary analysis suggests that the most efficient route for integrating biological  
27 information requires more work on type systems and logic formalisms in order to better  
28 capture the many uncertainties regularly found in biological data. To sample the  
29 problem space well enough, more studies like ours are needed that report how in-depth  
30 biological research challenges the expressivity of logic formalisms that have become  
31 candidates for implementation in the discussed compiler. Combining such observations  
32 with a rigorous in-depth usability and expert review process as defined elsewhere  
33 (LOEWE 2016) will greatly accelerate the definition of more appropriate logic formalisms,  
34 VBIRs compiler design, biological model curation, and thus progress towards meeting  
35 the grand challenges of our time. This new efficiency would indeed allow us to stand on  
36 the shoulders of giants and no longer have to start crawling upwards from the elbow  
37 whenever a new question arises.

38 *Overview of Sections.* In the next Section, we review biological and computation  
39 clock models, as well as the data model of FlyClockbase from a biological perspective.  
40 We then describe how we selected the data in FlyClockbase, how we processed time

1 series and which statistical methods we used. Our Results Section first quantifies the  
2 historic use of direct experimental time series observations in modeling studies. It then  
3 reviews the number of time series observed for each core clock component in  
4 *Drosophila melanogaster*. It provides an overview of the variability in all components  
5 before presenting a human error analysis investigating potential impacts of data  
6 handling errors in FlyClockbase on the variances of peak and valley timings of the  
7 *period* and *timeless* gene products, which are compared after defining a basic null-  
8 hypothesis for data in FlyClockbase. Our last result compares methods for observing  
9 mRNA. We start our Discussion Section by explaining, how FlyClockbase facilitates  
10 hypothesis-driven research. We then discuss the two hypotheses tested in this study  
11 and suggest mechanistic models for further testing. Next, we broaden our view to  
12 discuss the importance of model curation for molecular systems biology data. We then  
13 highlight observations that illustrate, how a tool with the capabilities of a specially  
14 crafted programming language compiler could advance work in FlyClockbase and  
15 beyond. We will pay attention to aspects like efficiency, error detection, and formal logic.  
16 Given the high likelihood of long-term loss of biological information resources, we finally  
17 discuss population genetics modeling results with some applicability to the fate of  
18 FlyClockbase. We do so in order to prioritize and motivate the next steps. We conclude  
19 with a list of the various disciplinary areas engaged by this study and how biological  
20 model curation will facilitate critical progress towards various grand challenges of our  
21 time. Our online material includes additional text with a more computational perspective  
22 and a supplementary statistical analysis to which we frequently refer in our results  
23 (including R source and data).

24

## MODELS

### Biological model of fly circadian clocks

The *D. melanogaster* clock is a gene regulatory network that receives environmental inputs (such as light and temperature) and produces its hallmark cyclical behavior through various interlocking positive and negative feedback loops (KUCZENSKI *et al.* 2007; WANG AND ZHOU 2010). Table 1 lists the most important clock components, and Figure 1 represents their key interactions in the Systems Biology Graphical Notation (MOODIE *et al.* 2011). The timing of various clock sub-processes is essential for any clock. Circadian clocks critically depend on generic cellular processes of importance in the information processing associated with proteins, such as transcription, translation, and degradation. Thus, mutations disrupting critical functions in these generic processes are also likely to affect the clock. However, they are also likely to have many other harmful consequences; hence, we do not consider them as *core* clock components (which are the exclusive focus of our study here).

Place TABLE 1 about here.

Place FIGURE 1 about here.

**Main loop.** Briefly, in the core (negative) feedback loop, the proteins CLOCK (CLK) and CYCLE (CYC) form a heterodimer and promote the transcription of *period* and *timeless* (DARLINGTON *et al.* 1998; RUTILA *et al.* 1998). PER protein is increasingly phosphorylated by DOUBLETIME (DBT) and several other kinases. Fully phosphorylated PER interacts with the F-box protein SLIMB (SLMB) to be marked for degradation unless TIM protein is present to form a PER/TIM complex. This complex represses the effects of the transcriptional activator CLK to form a negative feedback loop (GEKAKIS *et al.* 1995; KLOSS *et al.* 1998; LEE *et al.* 1998; PRICE *et al.* 1998; LEE *et al.* 1999; KLOSS *et al.* 2001; CHIU *et al.* 2008). When light is present, the protein CRYPTOCHROME (CRY) undergoes a conformational change that renders it active. As a final step before TIM degradation, activated CRY and the kinase SHAGGY (SGG) cause TIM in its phosphorylated form to interact with the F-box protein JETLAG (JET) (MARTINEK *et al.* 2001; KOH *et al.* 2006). If TIM is degraded thought its phosphorylated form, this will limit the formation of the PER/TIM complex. If this complex cannot form, then PER will be left in an isolated form in which it can be further phosphorylated (and thus be moved closer to its degradation). If PER pairs with TIM to form this complex, then PER cannot be phosphorylated, and it will temporarily stop its progress towards degradation. Thus degrading TIM facilitates the degradation of PER by allowing PER to

1 become fully phosphorylated (EMERY *et al.* 1998; NAIDOO *et al.* 1999; BUSZA *et al.* 2004;  
2 OZTURK *et al.* 2011). Consequently, PER/TIM complexes no longer repress CLK  
3 transcriptional activity, and CLK proceeds to start a new cycle by again promoting again  
4 the transcription of *per* and *tim*.

5  
6 **Other loops.** A second feedback loop primarily concerns *clk* transcription. CLK  
7 promotes transcription of both *PAR-domain protein 1 (pdp1)* and *vri* (BLAU 1999;  
8 McDONALD AND ROSBASH 2001; CYRAN *et al.* 2003). PDP1 protein then promotes the  
9 transcription of *clk*, while VRI represses the activity of PDP1 and inhibits the  
10 transcription of *clk*, creating positive and negative feedbacks, respectively (CYRAN *et al.*  
11 2003; GLOSSOP *et al.* 2003). The relatively recently discovered *clockwork orange (cwo)*  
12 modulates both feedback loops by weakly repressing CLK-mediated transcription of *per*,  
13 *tim*, *pdp1*, *vri*, and *cwo* itself (KADENER *et al.* 2007; LIM *et al.* 2007; MATSUMOTO *et al.*  
14 2007; RICHIER *et al.* 2008). The interplay between strong transcriptional activation  
15 promoted by CLK and weak repression from CWO protein counteracts “jitters,” or small  
16 variations in period (FATHALLAH-SHAYKH *et al.* 2009; FATHALLAH-SHAYKH 2010; SCRIBNER  
17 AND FATHALLAH-SHAYKH 2011). Other notable circadian products involved with post-  
18 translational modification, synchronization of clock neurons, and other processes  
19 include *casein kinase 2 alpha (ck2a)*, *protein phosphatase 2a (pp2a)*, *pigment-*  
20 *dispersing factor (pdf)*, *nemo (nmo)*, and others (GRIMA *et al.* 2002; KO *et al.* 2002; LIN  
21 *et al.* 2002a; SATHYANARAYANAN *et al.* 2004). A more detailed review of the clock can be  
22 found elsewhere (HARDIN 2011; ÖZKAYA AND ROSATO 2012).

## 23 24 25 26 ***In silico* models integrating fly clock observations**

27  
28 Mathematical models of circadian clocks have been contributing to our understanding of  
29 clock biology for decades.

30  
31 **Biological results overview.** The origins of many fly clock models can be traced  
32 back over 50 years to work by PITTENDRIGH & VICTOR (PITTENDRIGH AND VICTOR 1957;  
33 GOODWIN 1964; GOODWIN 1965) and GOODWIN (PITTENDRIGH AND VICTOR 1957; GOODWIN  
34 1964; GOODWIN 1965). Then GOLDBETER (1995) developed a model with five ordinary  
35 differential equations that use *per* mRNA and PER protein (in various phosphorylation  
36 states) to describe a negative feedback loop created when PER represses *per* mRNA  
37 transcription. LELOUP (1998a) expanded this model to include *tim* mRNA and TIM  
38 protein. Later models such as those published by UEDA (2001) and SMOLEN (2001)  
39 again expanded the feedback loops by adding CLK, and more recent models added a  
40 feedback loop based on *vri*, *pdp1* (SMOLEN *et al.* 2004; XIE AND KULASIRI 2007; KULASIRI

1 AND XIE 2008) and CWO (FATHALLAH-SHAYKH *et al.* 2009). Two other common points of  
2 interest for clock models were the importance of a positive feedback loop (TYSON *et al.*  
3 1999; SMOLEN *et al.* 2001; KUCZENSKI *et al.* 2007; WANG AND ZHOU 2010) and the  
4 influence of post-translational modifications such as phosphorylation (LEISE AND MOIN  
5 2007; RISAU-GUSMAN AND GLEISER 2012). Because the clock is able to adjust to  
6 temperature variations, a number of models further investigated the role of temperature  
7 on the clock (KIDD *et al.* 2015). Some temperature models, such as those by HONG  
8 (HONG AND TYSON 1997) and LELOUP (LELOUP AND GOLDBETER 1997), are based on  
9 GOLDBETER'S 1995 model, while others (RUOFF AND RENSING 1996; RUOFF *et al.* 1997;  
10 RUOFF *et al.* 1999) use the more general GOODWIN (1965) oscillator as a foundation.  
11 While models have become sophisticated enough to explain observable biological  
12 phenomena, methods have improved for choosing more realistic values for model  
13 parameters (KURATA *et al.* 2007; XIE *et al.* 2010; LEBIEDZ *et al.* 2012). A number of  
14 review articles compare the various clock models and present more details on their  
15 history (SMOLEN *et al.* 2000b; SMOLEN *et al.* 2000a; GOLDBETER 2002; KUROSAWA *et al.*  
16 2002; OGAWA *et al.* 2008; GERARD *et al.* 2009; LELOUP 2009; GONZE 2011; SCRIBNER AND  
17 FATHALLAH-SHAYKH 2011).

18  
19 **Role of stochasticity.** Researchers have also been using increasingly  
20 sophisticated computational approaches for simulating the clock. Many early models  
21 were constructed using deterministic ordinary differential equations, but some of their  
22 underlying assumptions are not always applicable to the clock. In particular,  
23 deterministic models assume large enough numbers of molecules so that any random  
24 variations caused by stochastic changes in the state of individual clock components are  
25 compensated at the level of the whole clock. Such large numbers of molecules may not  
26 be realistic for clocks at the cellular level (RUOFF *et al.* 1999). More recently, stochastic  
27 models have been constructed to overcome these limitations; these models are often  
28 derived from previously published deterministic equivalents (BARKAI AND LEIBLER 2000;  
29 ZAK *et al.* 2001; GONZE *et al.* 2002a; GONZE *et al.* 2002b; UEDA *et al.* 2002; VILAR *et al.*  
30 2002; GONZE *et al.* 2003; GONZE *et al.* 2004; MIURA *et al.* 2008). This allowed for a better  
31 understanding of how intracellular stochasticity generates noisy clock observations  
32 (BARKAI AND LEIBLER 2000; GONZE *et al.* 2002b; YI *et al.* 2006; LI AND LANG 2008; LERNER  
33 *et al.* 2015) and how this noise can be reduced by synchronizing clocks across groups  
34 of neurons (KATAKURA AND OHMORI 2006; BAGHERI *et al.* 2007; BAGHERI *et al.* 2008b;  
35 DIAMBRA AND MALTA 2012; RISAU-GUSMAN AND GLEISER 2014).

36  
37 **Shared problems.** The models above examine different aspects of the clock, but  
38 they all face two common modeling challenges: estimating parameters and testing the  
39 quality of models. Both issues require the ability to access and use high-quality  
40 experimental data, yet there is a painful lack of experimentally measured rate

1 parameters for important circadian clock processes. Researchers have used a wide  
2 range of methods to find potentially realistic parameters (LELOUP AND GOLDBETER 1998a;  
3 LELOUP AND GOLDBETER 2000; SMOLEN *et al.* 2001; SMOLEN *et al.* 2002; SMOLEN *et al.*  
4 2004; RUOFF *et al.* 2005; XIE AND KULASIRI 2007; BAGHERI *et al.* 2008a; KULASIRI AND XIE  
5 2008; WANG AND ZHOU 2010). These include trial-and-error approaches, but even the  
6 best systematic methods cannot guarantee finding rates that reflect nature's values. In  
7 principle, such searches aim to find combinations of input parameter values that cause  
8 models to produce time series mirroring those observed experimentally. This ideally  
9 provides ensembles of realistic parameter combinations that cannot be ruled out by  
10 experimental evidence. It is immaterial, whether such ensembles were generated by  
11 testing deterministically or stochastically proposed parameter combinations. However,  
12 in no case is it possible to "validate" any parameter combination on principal grounds  
13 due to the open nature of the models as discussed elsewhere (ORESQUES *et al.* 1994;  
14 TARANTOLA 2006). The best parameter estimates are thus "realistic" (up to a given  
15 stringency), and conclusions based on simulations using them are reasonable (up to the  
16 usually unknown degree to which these parameter combinations represent reality). This  
17 indirect approach has been successful in a wide range of disciplines for estimating  
18 parameters in complex models (e.g. (STAINFORTH *et al.* 2005)). The remaining  
19 "unknown" degree can be narrowed for a given model with unknown parameters by  
20 using statistically rigorous approaches (TARANTOLA AND VALETTE 1982; JAYNES AND  
21 BRETTHORST 2003; TARANTOLA 2005; TARANTOLA 2006; MOURA NETO AND SILVA NETO  
22 2013). The problem of unknown model parameters is widespread in many disciplines  
23 that use modeling approaches and has also become known as the "inverse problem"; it  
24 can be can be solved in principle by probability theory (TARANTOLA AND VALETTE 1982;  
25 JAYNES AND BRETTHORST 2003; TARANTOLA 2005; TARANTOLA 2006). Concisely stated,  
26 the inverse problem is the challenge to use all known data about a system for restricting  
27 the ranges of unknown causal input factors for a model that produces simulation output  
28 that is equivalent to data observed in the real system itself (even though the latter  
29 ultimately remains unknown). Solving the inverse problem for increasingly realistic  
30 biological models using growing datasets of varying quality quickly exceeds current  
31 mathematical and computational capabilities and thus remains a research challenge.  
32 Additional limits for such reverse-engineering of systems biology models may come  
33 from the large variability of their kinetic rates (ERGULER AND STUMPF 2011).

34  
35 **Parameter estimation in complex models.** Numerous algorithms can propose  
36 sequences of input parameter combinations that repeatedly reduce computed distances  
37 between simulated and observed data. However, few frameworks can rigorously  
38 estimate the statistical uncertainty associated with their point estimates. Maximum  
39 likelihood and Bayesian statistics are currently the frameworks that are most advanced  
40 (EDWARDS 1992; HEYDE 1997; JAYNES AND BRETTHORST 2003; BISHOP 2006). They

1 usually require a function that directly computes the likelihood that a given system will  
2 produce a given set of observations for a given set of input parameters. However, this  
3 likelihood function is increasingly difficult to specify for non-linear stochastic models of  
4 growing complexity such as the circadian clock models of interest. Help may come from  
5 formalized frameworks for Approximate Bayesian Computation (ABC) that have been  
6 developed in various disciplines and do not require explicit likelihood functions (TONI *et al.*  
7 *2009a*; CSILLERY *et al.* *2010a*; ROBERT *et al.* *2011*; SUNNAKER *et al.* *2013*; WILKINSON  
8 *2013*; LEE *et al.* *2014b*; STUMPF *2014*; BUZBAS AND ROSENBERG *2015*). In theory, ABC  
9 can solve inverse problems for all simulation models capable of producing output that is  
10 comparable to real observations. Briefly, ABC approximates likelihoods by (i) proposing  
11 new potentially realistic input parameters, (ii) simulating the model to predict  
12 corresponding results, (iii) calculating the distance of these results to experimentally  
13 observed data, and (iv) deciding which input parameters are actually supported by  
14 experimental evidence, based on comparing these distances to predetermined  
15 acceptance criteria. Thus, ABC generates ensembles of model variants, which describe  
16 sets of biologically realistic parameter combinations that quantify the uncertainty  
17 associated with a given model in the light of available data. Recent progress on  
18 uncertainty quantification via ensemble analysis has been reviewed by BAUER *et al.*  
19 (BAUER *et al.* *2015*). The accuracy of such ensembles depends on the quality of  
20 distance measures, acceptance criteria, and sampling density in relevant regions of  
21 parameter space. The statistical, numerical and computational challenges associated  
22 with ABC increase with model complexity and data diversity. In practice, sampling  
23 speed is often limiting, and distances to observed data might have to rely on summary  
24 statistics that can create complicated biases. These biases will matter when models  
25 with different structures are compared and these summary statistics do not capture all  
26 information that is relevant for fully evaluating the models (ROBERT *et al.* *2011*).  
27 Fortunately, these problems can be solved for simulations of biochemical systems (TONI  
28 *et al.* *2009a*; ROBERT *et al.* *2011*). Generally, ABC benefits from access to raw  
29 experimental observations such as time series to maximize the information used to  
30 estimate parameters and minimize bias from incompletely processed data. Estimating  
31 parameters using ABC in fly clock models of realistic complexity is very challenging and  
32 has not yet been attempted (to the best of our knowledge; recent work in *Neurospora*  
33 clocks (DENG *et al.* *2016*) demonstrates some of the challenges). While the full potential  
34 of ABC still waits to be realized, the clock modeling community has estimated  
35 parameters either by fitting model output to abstract time series traits or by using time  
36 series data more directly. These approaches are discussed next.

37  
38 **Using abstract time series traits.** The use of higher-level abstractions of time  
39 series traits can greatly simplify assessing the realism of a given circadian clock model,  
40 at least when compared to data-intensive work with raw time series. Despite the very



1 general nature of abstract traits (e.g. “oscillates” or “has feedback loops”), they can  
2 provide powerful filters for removing biologically uninteresting parameter combinations  
3 when analyzing circadian clocks. More specific examples of such abstract traits are:  
4 1. period close to 24 hours or modified as observed in mutants (GOLDBETER 1995;  
5 LELOUP AND GOLDBETER 1998a; LELOUP AND GOLDBETER 1998b; ROENNEBERG AND  
6 MERROW 1998; LELOUP AND GOLDBETER 2000; UEDA *et al.* 2001; FATHALLAH-SHAYKH  
7 *et al.* 2009; WANG AND ZHOU 2010; RISAU-GUSMAN AND GLEISER 2012),  
8 2. phase changes based on light exposure (ROENNEBERG AND MERROW 1998; SMOLEN  
9 *et al.* 2004),  
10 3. ability to account for responses to light, including light pulses (ROENNEBERG AND  
11 MERROW 1998; TYSON *et al.* 1999; LELOUP AND GOLDBETER 2000; LELOUP AND  
12 GOLDBETER 2001; PETRI AND STENGL 2001; SMOLEN *et al.* 2001; SMOLEN *et al.* 2002;  
13 SMOLEN *et al.* 2004; RUOFF *et al.* 2005; BAGHERI *et al.* 2008a; FATHALLAH-SHAYKH *et al.*  
14 2009)  
15 4. ability to be properly entrained (SMOLEN *et al.* 2001; SMOLEN *et al.* 2002),  
16 5. robustness to small parameter changes (SMOLEN *et al.* 2001; SMOLEN 2002; SMOLEN  
17 *et al.* 2004),  
18 6. ability to replicate the behavior of mutants (ROENNEBERG AND MERROW 1998; TYSON  
19 *et al.* 1999; SMOLEN *et al.* 2004; RUOFF *et al.* 2005; BAGHERI *et al.* 2008a; FATHALLAH-  
20 SHAYKH *et al.* 2009; RISAU-GUSMAN AND GLEISER 2012),  
21 7. delay between the peaks of a given mRNA and its protein (LELOUP AND GOLDBETER  
22 1998b; SCHEPER *et al.* 1999a; SCHEPER *et al.* 1999b; SMOLEN *et al.* 2001; SMOLEN *et al.*  
23 2002; XIE AND KULASIRI 2007; WANG AND ZHOU 2010; RISAU-GUSMAN AND GLEISER  
24 2012),  
25 8. dynamics of the combined amounts of all forms of PER protein (PETRI AND STENGL  
26 2001; SMOLEN *et al.* 2004), and  
27 9. time at peak expression of a given clock component (PETRI AND STENGL 2001;  
28 FATHALLAH-SHAYKH *et al.* 2009).

29 Comparing simulation results and observed values for such abstract clock traits is  
30 generally easier than comparing simulations with complex experimental data. However,  
31 it is unclear how much information about circadian clocks is preserved and how much is  
32 biased or lost when reducing all relevant circadian clock output to the abstract  
33 measures given here.

34  
35 **Using complete observed time series.** To reduce these uncontrollable biases  
36 from using abstract traits, researchers might seek to incorporate all available time series  
37 data in more direct tests to compare the distance between observed and simulated time  
38 series. The core idea is to increase statistical power by including as much information  
39 as possible when estimating parameters and to use repeated observations to obtain  
40 better estimates of the underlying distributions. It is therefore desirable to integrate all

1 observed time series of clocks in flies in a single biological information resource. More  
2 time series also facilitate recognizing genuine clock signals among the experimental  
3 noise inevitably associated with all biological observations and thus help avoid  
4 overfitting. In practice, creating models based on experimental time series is  
5 complicated by diverse challenges:

- 6 (i) All challenges of inverse problems with many dimensions discussed above are (or  
7 seem) exacerbated because time series usually provide more degrees of freedom  
8 than lower-dimensional summaries of their features. Parameter estimation is  
9 particularly difficult due to the complex, non-linear relationships between clock  
10 components (TARANTOLA AND VALETTE 1982; FORGER *et al.* 2005). While recent  
11 progress in developing statistical frameworks like ABC is encouraging, these are not  
12 straightforward to use for models with more than a dozen unknown parameters (TONI  
13 *et al.* 2009b; CSILLERY *et al.* 2010b; SOUBEYRAND *et al.* 2013; SUNNAKER *et al.* 2013;  
14 WU *et al.* 2014). Exploring such techniques is beyond the scope of this paper; here  
15 we aim to present a real-world, research-grade dataset that provides a non-trivial  
16 versatility and complexity test for candidate methods.
- 17 (ii) It can be difficult to choose optimal measures for comparing time series, regardless  
18 of whether applied to simulations or experimental data. There are many “standard  
19 measures” for comparing time series in general (e.g. the Euclidian distance,  
20 equivalent to the assumption that amounts follow a Normal distribution), and  
21 circadian clock time series in particular (e.g. period length). Selecting one or more  
22 appropriate measures is not trivial (GLYNN *et al.* 2006; REFINETTI *et al.* 2007; DING *et al.*  
23 2008; BATISTA *et al.* 2011; JIN 2011; SUN *et al.* 2014; YIN *et al.* 2014; BANKO AND  
24 ABONYI 2015; KOTSIFAKOS *et al.* 2016; MORI *et al.* 2016). This is particularly true  
25 when comparing time series with differently calibrated, non-linear scales that may be  
26 associated with substantial measurement errors, as is often the case for  
27 experimental observations. Thus, many diverse quantitative methods can be used to  
28 calculate diverse measures of distance between time series. However, this does not  
29 solve the substantial qualitative need for arguing which quantitative approaches are  
30 appropriate, if any.
- 31 (iii) It is challenging to compile all relevant time series observations into one place and  
32 organize them in a uniformly accessible manner, as pertinent time series were  
33 observed using different methods in diverse contexts and span a rich body of  
34 literature across many years. Furthermore, data processing is complicated by many  
35 obstacles associated with scattered big data, which characterizes many types of  
36 biological information. Practical challenges include the degrees to which  
37 a. data is rarely compiled in a uniform, directly usable data format,  
38 b. different datasets require diverse manual corrections for special cases that are  
39 individually rare but aggregately comprise a substantial part of the data and are  
40 hence not ignorable,

- 1 c. time series data is always incomplete and gaps between observed time points
- 2 are irregular,
- 3 d. data is often insufficiently documented such that it becomes impossible to
- 4 determine essential information about the precise types and attributes that we
- 5 collect (and which document the precise meaning of the data),
- 6 e. data has ascertainment and other biases as well as error rates that are poorly
- 7 documented and difficult to control (see reports (CLARK *et al.* 2005; LACHANCE
- 8 AND TISHKOFF 2013) of biases in initial samples of human genomes),
- 9 f. there are other practical problems that are often associated with scattered big
- 10 data (see, e.g. (GITELMAN 2013; MCCALLUM 2013)), or that require too much data
- 11 wrangling before a given information resource becomes useful (GOLDSTON 2008).

12 The aggregated difficulties of navigating all these challenges make it much easier to  
13 understand why only a minority of circadian clock modelers chose to estimate  
14 parameters directly from such time-series data, and why many others preferred to  
15 match abstract time series traits (see Results below).

16  
17 **Using both, complete observed time series and abstract traits.** It is obvious  
18 that both types of observations presented above have advantages and disadvantages.

19 *Complete experimentally observed time series* increase the information available  
20 for parameter inference, but bring the costs of handling more complex, yet incomplete  
21 datasets associated with the inevitable problems of real-world measurements. Due to  
22 experimental challenges, almost all such time series report relative amounts that are  
23 comparable within a specific observed time series. It is rarely possible to obtain  
24 reasonably precise calibrations those absolute units that matter most for modeling: the  
25 counts of different types of molecules within their respective cellular compartments.  
26 Furthermore, experiments may only report aggregated amounts, averaging over cells or  
27 other biological units. Such practical details can substantially complicate the  
28 computation of the likelihood that a given model will produce a certain observation.  
29 Solving these problems does not determine the weights of different points of  
30 observation in time series. Ideally, such weights maximize the impact of key information  
31 while minimizing noise to avoid overfitting from algorithms that focus on unimportant  
32 details, especially if no absolute calibration is available (as usual). Thus, many  
33 researchers have historically avoided raw time series and used higher-level abstractions  
34 of time series traits to assess the realism of circadian clock models. The relative  
35 difficulties of implementation may have contributed to this trend reported in the Results.

36 *Working with abstract time series traits* provides the ease of using higher-level  
37 traits, but comes at a price of its own. Abstract traits usually require fewer dimensions to  
38 be managed and could minimize overfitting if they provide a focused view of important  
39 clock features. However, abstract clock traits are difficult to choose and can easily omit  
40 potentially pivotal information. Higher levels of abstraction can make it easier to find

1 parameter combinations that mimic observed ones ‘reasonably well’. Since the quality  
2 of such fits to observations can be judged in many ways, abstract traits might make it  
3 too easy to produce a ‘working clock’. Such model can easily omit details that are  
4 essential for understanding a *particular* biological circadian clock. In the worst case they  
5 degenerate into descriptions of artificial circuits that oscillate, but are unlikely to help us  
6 understand the carbon-based circadian clocks studied in biology. Abstract time series  
7 traits can reject many parameter combinations as biologically irrelevant and thus  
8 pivotally contribute to the construction of useful clock models. Any given abstract trait is  
9 not likely to extract all statistical information from the data. Thus, combining many such  
10 traits is essential for successful modeling, yet there is no guarantee that any  
11 combination will be statistically sufficient such that it can extract all relevant statistical  
12 information.

13 *Distances.* Furthermore, the use of multiple abstract traits raises the question of  
14 how to compute distances among and between simulated models and independent wet  
15 lab observations. Many summary statistics provide distance measures that can be  
16 adequate for some questions, yet cannot extract all information from the data and are  
17 therefore not adequate for other questions. The pervasive non-linearity of circadian  
18 clock systems complicates combining multiple traits into one reliable overall summary  
19 distance statistic. This results in unknown, unpredictable and hence uncontrollable  
20 biases when estimating parameters for clock models. To reduce these uncontrollable  
21 biases caused by abstract traits with imperfect statistical properties, researchers have  
22 started to incorporate more time series data in more direct comparisons of distances  
23 between observed and simulated time series (see below).

24 *Both sides offer advantages.* It might eventually be possible to combine their  
25 insights for improving the accuracy and robustness of parameter estimates in circadian  
26 clocks. It often appears easier to compare abstract clock traits than the data-rich  
27 simulated time series and corresponding experimental observations that necessarily  
28 come with many gaps and complex nuances. However, potentially important aspects of  
29 circadian clock mechanisms might be impossible to uncover, except by using a more  
30 data-rich time series based approach. This extra data often adds many more  
31 dimensions, uncertainties and complexities. It can easily overburden modeling studies  
32 with irrelevant details and noise that may lead to overfitting. To counter such difficulties,  
33 abstract traits may complement full time series data by acting as powerful filters that  
34 remove unrealistic models, which might be difficult to identify in other ways. Combining  
35 both approaches could provide a powerful set of tests for detecting realistic oscillation  
36 patterns in new circadian clock models. Increasing the statistical power of such tests will  
37 make it increasingly difficult for them to be passed by random parameter combinations.  
38 To find values that pass all filters and move beyond a given local optimum, researchers  
39 can now use a broad array of optimization techniques combined with raw computational  
40 power (BUSSIECK AND MEERAUS 2004; BAGHERI *et al.* 2008a; LEUGERING 2012; 2016).

1 However, finding parameter combinations that have extremely rare desired properties  
2 does not guarantee the correctness of a model (see discussion in (LOEWE 2016)). The  
3 vastness of parameter spaces requires caution when claiming that useful parameter  
4 combinations for circadian clock models describe biological reality (see ORESKES *et al.*  
5 (1994)), even if it was difficult to find working parameter combination. Other input might  
6 pass the same set of tests and thus have the same claim to be in an ensemble that  
7 might be used to represent biological reality. The purpose of FlyClockbase is to improve  
8 the availability of data for testing clock models that might be part of such ensembles.  
9  
10  
11

12 **Studies integrating time series data.** The challenges above present significant  
13 barriers to the incorporation of experimental data into models of the *D. melanogaster*  
14 circadian clock. Thus it is not surprising that only three of the many modeling studies we  
15 surveyed (see Results below) used experimentally observed fly time series to estimate  
16 clock parameters in a more direct way. FATHALLAH-SHAYKH (2009) used published  
17 microarray data from KADENER (2007) to fit parameters related to cry mRNA oscillation.  
18 KUCZENSKI (2007) used a Monte Carlo random walk method to find a set of parameters  
19 most similar to time series of circadian mRNA and proteins from twelve different  
20 experimental studies (HARDIN *et al.* 1992; ZENG *et al.* 1994; SEHGAL *et al.* 1995; MARRUS  
21 *et al.* 1996; SO AND ROSBASH 1997; BAE *et al.* 1998; LEE *et al.* 1998; BLAU 1999; BAE *et*  
22 *al.* 2000; KIM *et al.* 2002; CYRAN *et al.* 2003; GLOSSOP *et al.* 2003). LEISE (2007)  
23 employed a coordinate search method to estimate parameters based on time series  
24 from three papers (LEE *et al.* 1998; BAE *et al.* 2000; SHAFER *et al.* 2002). Both  
25 KUCZENSKI (2007) and LEISE (2007) point to the fit between the experimental and  
26 simulation data as evidence of the quality of their models. While further discussion of  
27 the many statistical challenges of parameter estimation in real-world datasets is beyond  
28 the scope of this study, we note here that such discussion is rather hypothetical without  
29 an actual real-world compilation of “all known” time series observations that can test  
30 how many of the real-world complications can be handled by any given approach.

31 One purpose of our study is to provide such an integrated dataset that paves the  
32 way for more thorough analyses of statistical approaches to assessing how good a  
33 given simulation result might fit to “all known experimental observations” of wildtype and  
34 wildtype-like *D. melanogaster* clocks. We created FlyClockbase to lower the barriers  
35 that currently limit the use of real-world data for improving simulation models.  
36  
37  
38

## 1 FlyClockbase data model overview

2  
3 FlyClockbase is a file-based database for collecting and organizing experimentally  
4 observed time series of *D. melanogaster*, reporting the core circadian clock  
5 components, such as mRNAs and proteins in various states. FlyClockbase is dedicated  
6 to circadian clock research in flies and can after sufficient stabilization accept  
7 observations of circadian clocks in other organisms. It is publicly available at:

8  
9 **<https://github.com/FlyClockbase>**

10 *will become active some time before final publication. For reviewing purposes,*  
11 *see the simultaneously submitted (not-yet-public) zip-archive; for pre-publication*  
12 *access, please request a copy from Laurence Loewe, who will maintain*  
13 *FlyClockbase for the foreseeable future.*

14  
15 Despite starting with a shared interest in the same model organism, FlyClockbase is  
16 completely independent from FlyBase (DOS SANTOS *et al.* 2015), a portal for genomic  
17 and other information about *Drosophila* as a model organism.

18  
19 Place FIGURE 2 about here.

20  
21 **Overview.** Constructing and maintaining a highly specialized biological information  
22 resource like FlyClockbase is only feasible for skilled biologists with a passion for flies  
23 and clocks. To improve the probability of finding capable biologist curators, we deemed  
24 it important to minimize the computational expertise required for making substantial  
25 contributions to FlyClockbase. We were aiming to minimize IT overheads of initial  
26 construction and longer-term maintenance. As discussed below and in the  
27 Supplemental Material, this goal informed important requirements for improving the  
28 efficiency of biologists curating FlyClockbase and the accuracy with which its formal  
29 type system can capture biologically relevant information. As a result, we have made a  
30 number of unconventional database design decisions. Below we summarize key  
31 differences between the FlyClockbase design presented here and other typical  
32 database designs currently used. We provide more details in the Supplemental Material,  
33 but a full technical description of FlyClockbase is beyond the scope of this study, nor  
34 can we appropriately present the many considerations that informed the current design.  
35 Instead, we focus here on how our choices help biologists, who are (i) interested in the  
36 biological question of reliably observable variability in circadian clocks of flies, or are  
37 (ii) aiming to navigate FlyClockbase for using, building on, or contributing to the quality  
38 of data in this new resource. Figure 2 provides an overview of high-level organization  
39 and Table 2 lists the Brief and Explicit Names of various FlyClockbase data structures  
40 (we use these *Italicized Proper Names* to distinguish well-specified FlyClockbase data

1 structures from the meaning of their generic English counterparts in usual orthography).  
2 FlyClockbase is a Versioned Biological Information Resource (*VBIR*) with two *Sections*:

- 3  
4 • *SumS*, the *Summary Section* stores statistical summaries of time series, such as  
5 arithmetic averages. We extracted these as they were presented in relevant  
6 publications (see Materials and Methods).  
7
- 8 • *DetS*, the *Details Section* stores all individual observations available at a stage  
9 where they have not been aggregated into summary statistics. This enables  
10 independent researchers to compute the best summary statistics for investigating  
11 specific questions. Describing *DetS* is beyond the scope of this study (raw data is  
12 almost never reported among the publications in FlyClockbase; see below).  
13

14 Each *Section* stores variants of time series in the form of *Raw* and *Modified*  
15 *Observations* (each in an *ObsRaw* or *ObsMod TimeSeries ContentTable*, respectively).  
16 The big workflow steps of importing, fully integrating data, and extracting data for  
17 analysis are marked in Figure 2 as steps D1-D10 and S1-S8. To facilitate comparisons  
18 across different datasets, we refine *ObsRaw* into *ObsMod* data in our current workflow  
19 Step S5 (for more details, see Materials and Methods Section below). Each *TimeSeries*  
20 is further characterized by some *Attributes* and may exhibit certain *Traits* (see below for  
21 details). *Attributes* denote inherent features that need to be stored and cannot be  
22 computed, such an observed genotype. *Traits* capture emergent features that need to  
23 be computed from the *Content* and *Attributes* of a time series, such as ‘peaks’.  
24 Separating *Attributes* and *Traits* helps to keep FlyClockbase organized and simplifies  
25 selecting relevant time series (see Steps S6-S8, D6-D8 in Figure 2).  
26

27 Place TABLE 2 about here.  
28

29 **Logic in biology.** Both, *Attributes* and *Traits*, may be absent in ways that may  
30 be of biological interest and differ fundamentally between time series. These challenges  
31 inspired us to investigate fundamental aspects of type systems and logic in  
32 programming languages in a search for appropriate ways of quantifying various aspects  
33 of uncertainty, unavailability, and inability to be tested shared among many scattered  
34 and diverse datasets of biological interest. In the Supplemental Material we discuss a  
35 new data type termed ‘BioBinary’ which stores one of the four alternative states termed  
36 OK, OKO, KO, MIS, which are defined by an enumeration termed ‘OKScale’. The  
37 BioBinary type is designed for handling statements in biology, where “*completely true*”  
38 or “*entirely false*”, are less appropriate than “*any transient intermediate*” or “*mistake*”  
39 (see also Discussion below, Supplemental Material, and p.16 of the online supporting  
40 material in LOEWE et al. (2017); a full analysis is beyond our scope here).  
41

1           **Other design decisions** of interest to biologists discussed in the Supplemental  
2 Material include:

- 3 • the intertwining and mutual stimulation of the development of FlyClockbase and the  
4 unconventional way in which the Evolvix modeling language (<http://evolvix.org>), is  
5 being developed (LOEWE 2016) from a first prototype for recording time series in  
6 pure mass action models (EHLERT AND LOEWE 2014) towards adding general-  
7 purpose programming capabilities with the triple goal of maximizing expressivity,  
8 usability, and long-term backwards compatibility;
- 9 • the use of a stabilizing versioning number system for facilitating review processes in  
10 ways that improve the possibilities of working towards long-term stability without  
11 frustrating innovators by turning them away, based on the StabilizingZone of the  
12 Project Organization Stabilizing Tool (POST) system (see p.74 of online supporting  
13 material in (LOEWE 2016));
- 14 • reasons beyond ease of implementation and installation for not choosing a  
15 conventional database system, but rather design-dedicated file-folder structures in a  
16 file system that can be copied easily across system boundaries;

17 While these points are important for questions of reproducibility and programming  
18 language development in biology and beyond, they do not directly apply to the biology  
19 of circadian clocks and are hence discussed in the Supplemental Material. We next  
20 highlight aspects of FlyClockbase that impact the ability of users to represent very  
21 diverse data in a surprisingly direct way: our particular choice of basic storage  
22 technology.

23  
24           **Simple file system storage.** To increase flexibility, FlyClockbase stores data in  
25 a simple, well-defined, stable layout of files and folders in standard file systems. This  
26 design is intended to:

- 27 • maximize accessibility to biologists with very diverse levels of computational literacy  
28 and who use many different computing platforms. On all of these platforms it should  
29 be easy for any researcher to start FlyClockbase: experimental biologists, who  
30 strongly prefer to work with standard spreadsheet software as well as computational  
31 biologists, who strongly prefer direct programmatic access to raw data files to  
32 implement their own analyses,
- 33 • minimize long-term maintenance costs by delegating storage to standard file  
34 systems that maximize ease of distribution across diverse platforms,
- 35 • reduce the need for mandatory database updates that may require costly developer  
36 time or endanger the accessibility of valuable data.

37 These advantages come at the cost of requiring the discipline necessary to maintaining  
38 consistency, and expecting users to not irresponsibly alter data that is freely accessible  
39 to them. We expect FlyClockbase mostly to be maintained by researchers with sufficient  
40 experience and for submissions to be appropriately reviewed so it is always easy for



1 beginners to get the last authoritative version in case they need a fresh start. Our  
2 choices of technologies and formats have numerous strategic reasons further detailed  
3 in the Supplemental Material.

4  
5 **Flexibility.** In light of the enormous logic and error-reporting challenges faced by  
6 any application (see Supplemental Material), our decision to design FlyClockbase  
7 around the simpler and less restrictive technology of a filesystem has provided us with  
8 an open field of efficient experimentation to improve our way of handling the challenges  
9 of data curation. Our key insight here is the importance to empower experimental  
10 biologists with little or no computing background to efficiently *launch* important decisions  
11 about the type system and controlled lists used in FlyClockbase. Launching is not  
12 landing; developing a stable type-system requires more experience than launching the  
13 decision to consider adding a new biological special case. The importance of efficiently  
14 communicating and collaborating across very different disciplines cannot be over-  
15 emphasized: most people with enough formal experience to understand formal type  
16 systems (PIERCE 2002; PIERCE 2005) cannot imagine the many special biological cases  
17 that a corresponding logic would have to be able to handle. This is different for  
18 experimental biologists: if they cannot recall these from the top of their head, a few days  
19 or weeks in the lab will quickly help them to remember. However, acquiring the  
20 necessary biological expertise, usually comes at the cost of less training in the abstract  
21 art of designing consistent and stable type systems.

22 Practically, we developed FlyClockbase's flexible file system folder-structure to  
23 enable the storage of content in standardized spreadsheet files easily modified by  
24 common spreadsheet programs. We found this easy to use by experimental biologists  
25 who regularly experience (and thus are best positioned to help reduce) the tension  
26 between the abstract type system (aiming to restrict chaos by setting some rules) and  
27 reality (with its own rules). Their contributions are best recorded on the spot in the most  
28 flexible form possible to ensure they are captured at all. This requires maximal flexibility  
29 and permissions and is simplest to implement by providing every local user of a local  
30 FlyClockbase installation the equivalent of full (FlyClockbase-)system administrator  
31 rights (including the ability to add, change, delete, or wreck anything and everything in  
32 their local copy of FlyClockbase). Please consult the Supplemental Material for a  
33 discussion of permissions, backups and the reliability of data storage.

34 These and other reasons beyond the scope of this study have motivated us to  
35 forgo the obvious speed advantages of well-known standard databases. We do this to  
36 gain the potential for a reduction in the cost of maintenance and an increase in stability,  
37 combined with the flexibility to experiment with more nuanced type systems. These type  
38 systems can better represent the complexity, diversity, uncertainty and occasional  
39 contradictions that are so pervasively found in biological data. While working on  
40 FlyClockbase, we encountered such problems regularly, as we tried to integrate all

1 available information about the circadian clock of *D. melanogaster*. The Discussion  
2 reviews some of these experiences, but a full analysis is beyond the scope of this  
3 paper.

4  
5 **Data types for organizing content.** FlyClockbase is organized around a few  
6 data types that help to structure its data (see Figure 2 for overview of components,  
7 highlighted as *ItalicizedProperNouns*). These are presented below after briefly  
8 discussing the fundamental recurring concepts of *Content*, *Attribute*, and *Trait*, which  
9 simplify navigating FlyClockbase data structures. Without loss of generality, we illustrate  
10 our definitions using observed time series as an example:

- 11 • *Content (Cnt)*: a container for directly storing ‘the data’ describing items of primary  
12 interest. For example, the *Content* of a time series observation in FlyClockbase is  
13 given by a series of pairs, each storing a time and a number - ordered so times keep  
14 increasing.
- 15 • *Attribute (Att)*: data about data. Each *Attribute* stores a type of value describing a  
16 fragment of information ‘inherent’ to a given data item, such as one of its owners,  
17 methods of observation, contexts, or types. The inherent nature of *Attributes* implies  
18 that they always have to be stored in addition to, and can never be derived from the  
19 *Content* they describe. Sometimes also called ‘metadata’, *Attributes* provide informal  
20 descriptions of the type or history of an item that can be essential for the correct  
21 interpretation of *Content*. For example, using the *Content* of time series requires  
22 *Attributes* describing which type of clock component was observed and in what  
23 context – neither of these can be derived from the *Content* itself.
- 24 • *Trait (Tra)*: data derived from data. *Traits* capture emergent features, which are  
25 externally defined properties, patterns, or conclusions derived from a given set of  
26 *Content* and its *Attributes*. For example, a time series that only records how some  
27 amount changes over time may allow the observation of one or more peaks, but  
28 neither the steps for recognizing such *Traits*, nor the annotations of peak presence  
29 or absence are part of the *Content* to which they refer.

30 Irrespective of how data is packaged, *Attributes* and *Traits* both characterize *Content*,  
31 but do so in different ways. In FlyClockbase the trio *Content*, *Attributes* and *Traits* form  
32 a causality chain. For example, the real-world circadian clocks of one or more flies **X** *in*  
33 *natura* causally affect the observed time series **Y** *in vivo*, which causally affect results of  
34 interest **Z** inferred *in silico*. Note that the flies **X** are described incompletely by *Attributes*,  
35 the time series **Y** is observed incompletely as *Content* and the results of interest **Z** are  
36 derived from *Content* and *Attributes* by using a set of steps that define this *Trait*.  
37 Researchers often search for some **Z** useful for investigating a **Y**, only to find their  
38 efforts undermined by loss of pivotal information on **X** (equivalent to missing type  
39 information causing many computer bugs).

1 FlyClockbase has been built to reduce this very problem for circadian clock  
2 research in *D. melanogaster* by providing scientists with all information about X, Y, and  
3 Z that has been made available, ideally without increasing, reducing, or biasing any  
4 existing uncertainties about X or Y. It is possible to package the same information in a  
5 myriad of different ways by nesting and re-packaging various combinations of these  
6 three. However, their diverse nature would make the use and maintenance of  
7 FlyClockbase unnecessarily complicated, as each type offers a distinct value: *Content*  
8 stores each time series that meets the required specification (a big but doable task,  
9 aiming for completion). Associated *Attributes* store as much biological and historic  
10 context information as possible (often impossibly difficult, making available *Attributes*  
11 very valuable). *Traits* are defined at will by active researchers investigating a given  
12 biological question or in search of new interesting *Traits* (it is always possible to define  
13 new ones, but few are interesting on the long run). Based on these, we define:

- 14 • *ContentTable (CntTbl)*: a table of frequently used data of type 'content' such as a  
15 specialized *TimeSeries ContentTable*; *Attributes* and *Traits* are stored separately  
16 (see below);
- 17 • *AttributeTable (AttTbl)*: a table of *Attributes* for a given *ContentTable*. Currently, the  
18 most important *AttributeTables* are those for *References*, and *Summary TimeSeries*;
- 19 • *TraitTable (TraTbl)*: a table of *Traits* as determined from the *Trait* definition and a  
20 given *ContentTable*. Currently, the most important *TraitTables* are those storing the  
21 *Peak* and *Valley* timing for the first day of each *TimeSeries* of each clock component  
22 after *ObsMod6* refinement (as given in *SearchResult*);
- 23 • *Reference (Ref)*: a specific set of *Attributes*, which combine to storing the  
24 bibliographic information about a published study that reports *Summaries* of  
25 experimentally observed *TimeSeries* or other data of interest (if not prohibited by  
26 copyright, FlyClockbase includes the corresponding files as *Content* of a *Reference*);
- 27 • *Reference AttributeTable (Ref AttTbl)*: stores each *Reference* (but not the files of its  
28 study), determining once and for all its unique *Reference\_IDX*, an index used  
29 throughout FlyClockbase (the next largest integer available);
- 30 • *Submission*: here a submitted set of experimental observations reporting enough  
31 *Details* to enable the independent computation of diverse *Summary* statistics of  
32 individual observations;
- 33 • *SearchResult*: a set of tables compiled automatically or manually from each  
34 *TimeSeries* in the *Details* and *Summary Section*, (i) by testing whether all *Attributes*  
35 meet the search criteria and (ii) for those that do, by testing whether the *Traits* of  
36 appropriately grouped individual or aggregated *TimeSeries* meets the *Trait* search  
37 criteria. Our results below derive from a single *SearchResult* extracted from  
38 *ObsMod6*, and analyzed in various ways as described.

39 The basic layout of the folder structure in FlyClockbase follows the layout specified in  
40 the Project Organization Stabilizing Tool (POST) system described elsewhere (LOEWE

1 2016). We next discuss additional data types of biological interest before returning to  
2 the current scope and data collection strategy of FlyClockbase.

3  
4 **Identification of *TimeSeries*.** This and future studies will need to refer to time  
5 series in FlyClockbase unambiguously. This requires a user-friendly system of precise  
6 and stable identification, in order to facilitate giving, using, and maintaining labels for  
7 time series with minimal effort. Defining such a system is a challenge facing various  
8 naming problems (see tables 1-2 in LOEWE 2016). We aimed to avoid two extremes: (i)  
9 Using the next running number for the next time series creates efficient labels, but  
10 complicates some frequent tasks, such as determining if a pair of time series belong to  
11 the same study. (ii) Descriptive labels including author, year, figure-panel, plot-symbol,  
12 etc. can be informative, but are often too tedious, hard to automate or difficult to  
13 maintain (e.g. avoid synonyms). We therefore developed a system that combines  
14 localized integers that stand for local *Items* in different frames of reference, each of  
15 which defines a *Context* that is itself an *Item*, nested into a bigger *Context*. The resulting  
16 nestable index integers gives the outermost local item identifier (*IDLocal*, *IDL*) as the  
17 first, top, left-most integer. This top *ID* is separated by a dot (‘.’) from the next *ID* and  
18 provides the *Context* necessary for interpreting this second, next-to-top, next-to-left-  
19 most integer. This *ID* in turn is separated by a dot from the third, etc., creating as many  
20 nested *Contexts* as needed (more details are beyond the scope of this study).

21 *In practice*, naming *TimeSeries* unambiguously in FlyClockbase requires the  
22 following three types of local identifiers for these three levels of nesting in the *Context*  
23 provided by FlyClockbase:

24 1. *Reference\_IDL*, points to a bibliographic reference.

25 The *Context* for interpreting the *IDLocal* of a *Ref* is FlyClockbase itself; *Ref\_IDL* is  
26 identical to *Reference\_IDX* introduced above.

27 2. *Figure\_IDL*, points to a *Figure* in the *Context* of a study, given by its *Ref\_IDL*.

28 3. *TimeSeries\_IDL* points to a *TimeSeries* in the *Context* of a figure panel,  
29 given by its *Figure\_IDL*.

30 Any contiguous sequence of the elements above forms an *IDFragment (IDF)*, which  
31 identifies its corresponding *Items*. To distinguish potentially ambiguous *IDFs* from full  
32 identifiers in a memory area, we denote the latter as ‘memory identifiers’, or *IDMs* for  
33 *IDMemory*. *IDMs* are unambiguous *IDFs* guaranteed to refer to a unique *Item* within a  
34 defined memory area, like unique time series IDs in FlyClockbase. Thus, we can  
35 unambiguously identify each *TimeSeries* by its *TimeSeries\_IDM* in the FlyClockbase  
36 *SummarySection* by using the following form:

37  
38 **TS\_IDM**

39 **SumS.Ref\_IDL.Fig\_IDL.TS\_IDL**

40 **SumS.Reference\_IDL.Figure\_IDL.TimeSeries\_IDL**

1 where each IDL is replaced by its respective integer. Like all other *IDLs*, these *IDLs* are  
2 stored as *TimeSeriesAttributes* in the corresponding *AttributeTable* (*SumS TS AttTbl*),  
3 along with *Attributes* for both identifying the figure in terms used in its publication, and  
4 the time series in its figure (e.g. capturing line-type, color, plot-symbol, etc.). Thus, a  
5 *TimeSeries\_IDM* such as 'SumS.1.2.3' refers to time series 3 in figure 2 of reference 1  
6 in the *SummarySection* of FlyClockbase. Since the numbering of time series in a figure  
7 panel (etc.), and the numbering of the latter in a study is far from clearly determined, the  
8 additional *Attributes* help identify the actual figure panel and time series denoted and  
9 would also facilitate the generation of automated reports in the future. For simplicity, we  
10 drop the leading "SumS ." from *TimeSeries\_IDMs* elsewhere in this text (all TS are  
11 *Summarized*). This is appropriate until a *DetailSection* (*DetS*) is introduced for capturing  
12 non-summarized time series measurements in FlyClockbase.

13 *For example*, four figures from one study (*Reference\_IDM* "2") may have the  
14 *Figure\_IDLs* 1, 2, 5, or 8, resulting in FlyClockbase-wide *Figure\_IDMs* 2.1, 2.2, 2.5, or  
15 2.8; currently, gaps in *Figure\_IDLs* (such as 3, 6, or 7) are allowed if unavoidable and  
16 may indicate that data has been excluded when we later found that it did not fit criteria  
17 for inclusion. If the above FlyClockbase-wide *Figure\_IDM* 2.5 includes the pertinent  
18 local *TimeSeries\_IDLs* 3, 7, and 8, then their FlyClockbase-wide *TimeSeries\_IDMs* will  
19 be 2.5.3, 2.5.7, and 2.5.8. Each such *TimeSeries\_IDM* points to a unique experimental  
20 observation, unless marked in FlyClockbase as one of the rare cases where a review  
21 re-publishes an older time series along with new data. In principle, a new *IDL* can be  
22 any integer that has not yet been used in its local context. In practice, FlyClockbase will  
23 critically depend on a single naming authority for assigning integers to their  
24 corresponding items and ensuring that these assignments are never changed. Initially  
25 this naming authority will be the maintainer of FlyClockbase, until this functionality can  
26 be automated. Submissions of new studies to FlyClockbase can assign final *IDLs* for  
27 figures and time series, but only a temporary *IDL* for a reference. The final  
28 *Reference\_IDM* can only be assigned once the new entry has arrived in memory area of  
29 FlyClockbase. Following proper procedures for these naming issues is essential for the  
30 integrity of FlyClockbase. Naming is complicated and the source of much concern for  
31 managing biological data in *VBIRs* (NIH *et al.* 2012; LOEWE 2016). Naming time series  
32 IDs provides a microcosm of the many problems that complicate naming. Still, fully  
33 specifying a concrete dataset for further analysis requires more than particular  
34 *TimeSeries\_IDMs*: it also requires specifying the type of observation, as discussed next.

35  
36 ***Raw, Mod, and Odd Observations.*** In FlyClockbase, each *Observation* (*Obs*),  
37 is a *TimeSeries ContentTable* with time values measured in in *DZT* or *CZT* (as defined  
38 below), and an associated measure of the amount of mRNA or protein at that time.  
39 Each observation also includes measures quantifying imprecision and variability as  
40 shown in the published figure (if any). *ObsRaw* ('raw observations') specify time as *DZT*

1 and contain the amount values as collected (including negative numbers or imprecision  
2 resulting from undetected human error during data collection). Each *ObsMod* ('modified  
3 observation') is a *TimeSeries ContentTable* measuring time in *CZT* and transforming  
4 observations to contain amounts of mRNA or protein that are easier to compare across  
5 time series (see steps S5,D5 in Figure 2). Recognizable problems with *ObsRaw* data  
6 are appropriately corrected in *ObsMod*. *ObsRaw* time series over less than 6 hours or  
7 with more than half of their *Content* marked as 'unreadable' were not simplified into  
8 *ObsMod*. To identify and correct errors in FlyClockbase, we found it useful to pay close  
9 attention to extreme values that might appear unusual or odd. We denote as *ObsOdd*.  
10 This does not exclude them from analyses, but motivated us to revisit the whole  
11 deduction chain that led to a given *ObsOdd*. Since any data collection will contain  
12 human errors, we thought that users of FlyClockbase might find it useful to have  
13 estimates of expected human error rates. We constructed repeated rounds of *ObsMod*  
14 (see below), which were then used for our final analyses.

15  
16 **Data types of time measurements.** We follow disciplinary conventions for  
17 defining ZT (ZeitgeberTime) as *hours* since the last light period started (dawn). We  
18 initially also defined this point in time as exactly ZT = 0. However, this resulted in  
19 occasional unintended confusion of two very different meanings, simply because both  
20 are conveniently denoted by zero: (i) a valid time measurement indicating an event  
21 exactly at dawn as denoted by '0' and (ii) the inappropriate use of '0' for indicating that a  
22 time was *NotGiven*. While the absence of a particular expected measurement is to be  
23 indicated by the label '*NotGiven*' in FlyClockbase, it proved difficult to guarantee that no  
24 unintended '0' could slip in. Elsewhere, such as for elementary addition, the use of '0'  
25 for indicating absence as in '0 apples' is justified; it is also common enough and deeply  
26 engrained, so that every new curator would have to spend significant learning effort to  
27 avoid this ambiguity. Moreover, such errors are difficult to find, because a careful  
28 analysis is required to determine, whether a particular '0' indicates '0h' or 'not given'.  
29 To improve the long-term quality of FlyClockbase *and* reduce curation costs, we decided to  
30 use a more robust Code2Brain interface (LOEWE 2016) instead. Hence, *DZT=0h* has  
31 been declared a risky ambiguity to be removed from FlyClockbase as soon as possible,  
32 whenever found (process is ongoing). The old *DZT=0h* is replaced by the new  
33 *DZT=24h*, such that  $0h < DZT \leq 24h$ , while absence continues to be denoted as  
34 *NotGiven*. We think that this new approach has a robust Code2Brain interface (LOEWE  
35 2016) and provides a high-quality representation of *Null* for DZT values (see Table 2  
36 and Discussion of Errors in Compilers below and elsewhere (WHITE *et al.* 2013)). An  
37 important difference exists between measuring fractions of *hours* in FlyClockbase and  
38 outside. Usually, 1 hour comprises 60 minutes, but hours in FlyClockbase are  
39 decimalized; thus, fractions of *hours* are measured in decimal fractions and not minutes  
40 and the next hour is imminent at 0.99 *h*, not 59 min.

1        *CZT*. To simplify analyzing several days of data in sequence, we define *Continuous*  
2 *ZT (CZT)* to be an extension of *ZT* such that time increases without interruption at the  
3 same rate over multiple days – instead of switching back to  $ZT = 0$  at the start of each  
4 new light period (dawn). Some studies use Circadian Time (*CT*), which can carry the  
5 connotation of time series recorded in unusual light schemes such as 24-hour darkness  
6 (*DD*) or 24-hour light (*LL*). *CZT* helps us to avoid any ambiguity. We use the term *Daily*  
7 *ZT (or DZT)* when we mean *ZT* in this study and in FlyClockbase to reduce the potential  
8 for confusion with *CZT* (also reduces ambiguity about types of time in code). Storing the  
9 respective day together with *DZT* or *ZT* creates a 1:1 relation to *CZT*. For example, the  
10 times of “lights on” (dawn) and “lights off” (dusk) over three days in the LD 12:12  
11 scheme (12 hours of light (*L*) followed by 12 hours of darkness (*D*) each day) used in  
12 the experiments of the initial FlyClockbase release can be given as *DZT* (24, 12, 24, 12,  
13 24, 12), where days are implicitly assumed to form a sequence. These times are  
14 equivalent to *CZT* (0, 12, 24, 36, 48, 60), using a different way of encoding days  
15 implicitly. *CZT* time series simplify selecting observations only from the first day in any  
16 given time series, as done in this study. We use italics for *DZT*, *CZT*, *h*, and *hours* to  
17 indicate that these types are used as defined in FlyClockbase (see Table 2). We do not  
18 italicize *ZT*, because we do not recommend its use in FlyClockbase.

19  
20        **Data types of amounts.** None of the time series data collected reflected  
21 absolute amounts or concentrations in a cell; rather, they show the amount of mRNA or  
22 protein relative to a reference. References are different for many time series, which  
23 presents a significant challenge when attempting to compare time series. The relative  
24 amount of mRNA or protein at a given time cannot be compared across studies, so we  
25 instead turned to a trait-based comparison method. We used modified observation  
26 tables to extract two *Traits* from each day of a given time series: time of maximum  
27 expression (“peak”) and time of minimum expression (“valley”). We then combined  
28 these two *Trait* values with time series *Attributes* to produce *PeakValleyTables*, which  
29 represent *SearchResults* for further analysis. For more details, please refer to the  
30 Materials and Methods.

31  
32        **Current definition of scope.** Aligned with our interest to construct the best  
33 possible circadian clock model for wildtype *D. melanogaster*, FlyClockbase currently  
34 only includes time series from wild-type or wild-type-like flies (e.g., Canton-s, yw,  
35 “control”) observed in a LD 12:12 environment from studies published between 1990  
36 and 2015 (see search criteria below). Thus, we currently exclude on purpose any  
37 mutants that are meant to carry changes in clock genes, diversity in light-dark regimes  
38 and other species for reducing the complexity of data curation. We include as “wildtype-  
39 like” any mutants that were constructed without the intention of altering the dynamics of  
40 clock components, including reporter genes (e.g. luciferase) and modifications to body

1 and eye color (e.g. yw). We thereby take the reported results at face value, implying that  
2 such genetic engineering actually does not affect clock dynamics. Testing this  
3 assumption is beyond the scope of this study and might become possible with the help  
4 of large numbers of replicates collected in FlyClockbase. Measurement errors  
5 associated with many observed time series are substantial and so is their variability  
6 between time series. Thus we assume in this study that “wildtype” and “wildtype-like”  
7 flies observed in the control experiments of many clock studies can be pooled. As a  
8 result, we are including time series from the 86 studies cited below in the first public  
9 release of FlyClockbase (QQv1 in the *StablizingZone* notation of the POST system  
10 (LOEWE 2016), see <http://evolix.org/post>). Beyond historic accident, there is no  
11 particular reason to limit FlyClockbase to this scope, as long as expansions of scope  
12 are coordinated carefully with corresponding data structures that enable the selection of  
13 desired datasets.

14  
15 **Collection of data.** Unfortunately, only one study provided individual raw time  
16 series observations in addition to summaries (SHI *et al.* 2014). For the 85 other studies,  
17 we extracted observed amounts and times from the time series figures published in  
18 these papers (by plot digitizing, see details below). Future releases of the database will  
19 allow the inclusion of individual time series observations in the *Details Section*. This will  
20 enable meta-analyses to customize the statistics they report in order to choose  
21 measures of variation that may be more appropriate than the arithmetic mean and  
22 standard deviation. In our experience not all studies specify the variation measures they  
23 report with the appropriate care (e.g. failing to specify whether a figure reports standard  
24 deviations or standard errors of the mean; see SALSBURG (1985) for similar  
25 experiences).



## MATERIALS AND METHODS

### Literature search

We searched the literature databases PubMed and Web of Science to collect references with time series data of the core components of the *D. melanogaster* circadian clock. Time series were broadly defined as any timed measurements of amounts of a relevant type of mRNA or protein that showed a daily peak or valley time for clock components, irrespective of the absence of scaling, calibration, and linearity. Search terms focused on variations of the terms “*drosophila melanogaster*” and “circadian clock” (plural, singular, or MeSH terms, or requiring any of the words in “circadian clock”). Marking phrases as specifically being MeSH terms did not influence the number of results. Using plural search terms (i.e., “circadian clocks,” “clocks”) reduced the number of results, sometimes by hundreds of articles. Requiring both words in “circadian clock” (as opposed to allowing either “circadian” or “clock”) also decreased results by up to half. To reduce the likelihood that relevant data would be excluded in the initial literature search, we chose terms that produced as many results as possible. The final literature search occurred on March 26, 2015. After we removed duplicate studies, this initial search produced 1249 results.

**Initial eligibility assessment.** We assessed the title and abstract of each study identified in the literature search based on the following three factors:

1. *Apparent content.* We excluded articles focusing on organisms other than *D. melanogaster* or centered on processes other than the core clock. We define the “core clock” to be comprised of genes integral to the functioning of the circadian clock in pacemaker cells, with a particular focus on the small ventral-lateral neurons. These genes include those shown in Figure 1 as well as *ck2a*, *sgg*, and *pdf* (see Table 1). Genes related to upstream or downstream clock processes were not included as part of the core clock; neither were genes that affect transcription, translation, or degradation rates in general. We also excluded papers if they were deemed unlikely to contain relevant time series based on the title. The articles we excluded based on this criterion focused on functional areas such as sleep, rest, arousal, locomotor rhythms, the visual system, metabolism and feeding.
2. *Type of data.* We only included papers with experimental data. As simulation data is beyond the scope of FlyClockbase, we excluded articles focusing solely on mathematical models since simulation data is beyond the scope of FlyClockbase.
3. *Format and availability.* We excluded the following reference formats because they

1 were unlikely to contain specific experimental data: book chapters and prefaces,  
2 comments, dispatches, features, meeting reports, monitors, news, outlook articles,  
3 prediction reports, perspective articles, and reports from workshops. We also  
4 excluded one paper that was not available in English.  
5  
6

7 We then examined the full texts of the remaining 603 studies to determine which papers  
8 contained time series data. We were able to find only one article with raw time series  
9 data (SHI *et al.* 2014), so we used time series figures as a summarized proxy for raw  
10 measurement data. We found 149 studies with at least one time series figure.  
11

12 **Biological eligibility assessment.** We further filtered these 149 studies with  
13 time series based on the following biological factors:

- 14 1. *External conditions.* We excluded time series with light schemes other than 12 hours  
15 each of light and darkness (12:12 LD) or with temperatures that varied over the time  
16 of collection.
- 17 2. *Observed cell specimens.* We required time series data to be based on  
18 measurements taken from biological material including at least some of the neurons  
19 closely related to the central clock in *Drosophila* (e.g., the small and large ventral-  
20 lateral, dorsal, dorsal-lateral, and posterior neurons, and S2 cells). For example, we  
21 included time series data taken from whole fly heads, whole flies, or the specified  
22 cell groups but excluded data from fly eyes or wings.
- 23 3. *Genotypes.* We only collected time series of wild-type or wild-type-like fly strains. We  
24 considered strains described as “wild-type”, “control”, “+/+”, or “Canton-s” to be wild-  
25 type strains. We also included other fly strains if they were natural variants such as  
26 CRY-H and CRY-s (time series IDs 9.1.1 and 9.1.2). We excluded genotypes with  
27 mutations intentionally inserted to affect levels of protein expression,  
28 phosphorylation, binding, or light response of core clock proteins. We characterized  
29 wildtype-like flies as any animals with mutations not believed to interfere with the  
30 operation of the clock. Examples include “yw” flies (have yellow bodies and white  
31 eyes) and insertions of reporter genes such as luciferase, which are co-expressed  
32 with clock genes.
- 33 4. *Amount and type of data.* We excluded time series if they were generated by  
34 mathematical extrapolation, contained fewer than three data points, or covered less  
35 than 12 hours.

36 The 86 remaining studies were defined as biologically eligible for inclusion in the initial  
37 release of FlyClockbase and each study, relevant figure and relevant time series were  
38 given a corresponding *Reference\_IDM*, *Figure\_IDL*, and *TimeSeries\_IDL* as described  
39 above (see Figure 2, Steps S1-S4, and Section Identification of *TimeSeries*).  
40  
41

## TimeSeries data extraction

Since only a single study provided raw time series data in its online material (SHI *et al.* 2014), we extracted numbers for amounts and times from plotted time series in figures as follows. We first extracted a screenshot of each figure from an appropriately magnified downloaded PDF-formatted copy of the relevant study (using the Mac OSX program “Grab,” a simple application for taking screenshots). We then extracted the data from each individual time series from its corresponding image using the open source program “Plot Digitizer” (version 2.6.3 available at <http://plotdigitizer.sourceforge.net/>) and recorded the result in a *SummarySection ObsRaw TimeSeries ContentTable* (Step S2 in Figure 2). Plot Digitizer requires users to specify the plotted values and the physical locations of minima and maxima for each of the x- and y-axes in the figure. We did not detect significant curvature in the planes of plots (as might be added by careless digitizing of printed copies) and therefore assume that Plot Digitizer’s linear interpolation provides reasonably accurate numerical x and y coordinates of each point manually selected by the user. All y-axis values were directly recorded using Plot Digitizer, unless a study specifically stated the value of mRNA or protein at a given time. For x-axis, the value from Plot Digitizer was disregarded if the value was noted in the text or clearly marked on the graph.

**Accuracy estimates of digitized TimeSeries data.** To assess the human operator component of digitizing accuracy, we measured the variability of plot-digitizing by three authors. Each operator plot-digitized the sample time series (63.1, WTL D, green line with green squares) independently three times to produce a set of values ready for inclusion as if it was true raw data. For each operator, time point digitized, and axis, we calculated the following values: the mean of the absolute value of the relative difference between each pair of the three independently produced values. Averaging over all time points allowed us to calculate the average operator difference percentage for the time axis,  $t_{aod}$ , representing an estimate of the relative error that one might expect for a new value added to a time series in FlyClockbase by plot-digitizing. We observed these intra-operator averages for time (with a maximal value of  $t_{max} = 48$ ):

$t_{aod} = 0.72\%$ ,  $1.79\%$ ,  $1.80\%$ , including the first point, and  
 $t_{aod} = 0.76\%$ ,  $1.07\%$ ,  $0.75\%$ , excluding the first point of the time series for operator 1, 2, and 3, respectively.

We also observed the following equivalent measures for the amount values  $v_{aod}$  on the y-axis (with the maximal value of  $v_{max} = 2$ ), resulting in averages of

1  
2  $v_{aod} = 0.95\%$ ,  $1.15\%$ ,  $1.11\%$ , including the first point, and  
3  $v_{aod} = 1.00\%$ ,  $1.23\%$ ,  $1.16\%$ , excluding the first point.

4  
5 Operator 3 plot-digitized all values in FlyClockbase. We averaged all values digitized by  
6 all operators and we found:

7  
8  $t_{aod} = 1.40\%$  and  $v_{aod} = 1.06\%$ , including the first point, and  
9  $t_{aod} = 0.84\%$  and  $v_{aod} = 1.12\%$ , excluding the first point.

10  
11 Averaging coefficients of variation calculated separately for each time point by  
12 combining data from all operators gives

13  
14  $t_{acv} = 1.72\%$  and  $v_{acv} = 2.61\%$ , including the first point, and  
15  $t_{acv} = 0.90\%$  and  $v_{acv} = 2.79\%$ , excluding the first point.

16  
17 The drop in  $t_{aod}$  and  $t_{acv}$  when excluding the first point of the time series stems from the  
18 uniformity of absolute errors ('hit a point on screen'), which results in a proportionally  
19 larger impact on small values; this can help estimating precise values near zero.

20 Overall, these measurements indicate that relative errors introduced by plot-  
21 digitizing are small (1% or less) compared to the errors associated with the wet-lab  
22 measurements. Thus, we conclude that errors from plot-digitizing can usually be  
23 ignored. However, these are not the only potential errors in FlyClockbase. We refined  
24 each *ObsRaw TimeSeries ContentTable* (direct from plot-digitizing) into a  
25 corresponding *ObsMod TimeSeries ContentTable* (see Step S5 in Figure 2) by  
26 correcting human errors associated with data extraction and annotation, as discussed  
27 below.

28  
29 **Extracting *TimeSeries Attributes*.** After extracting *ObsRaw TimeSeries*  
30 *Content* from published figures, we extracted associated *TimeSeries Attributes* and  
31 *Reference Attributes* from the corresponding published experimental studies (see Steps  
32 S3-S4, Figure 2). *Attributes* relevant to a study as a whole is recorded in the *Reference*  
33 *AttributesTable*, while *Attributes* specific to a given time series is in the *TimeSeries*  
34 *AttributesTable*. We collected *Attributes* for each *TimeSeries* to serve two purposes:

- 35  
36 (i) to help us to ensure *TimeSeries* fit the biological eligibility criteria previously  
37 described;  
38 (ii) *Attributes* enable later comparisons of biological, methodological, and other factors  
39 that could result in variability between time series.

1 We collected *Attributes* related to these three categories of questions:

2  
3 1. Information about the time series

- 4 a. Which *MethodRealm* does the time series belong to (*in vitro*, *in vivo*, *ex vivo*, *post*  
5 *mortem*)?  
6 b. What is the molecular type of the time series? Which protein or mRNA does it  
7 represent? Which isoform or splicing variant, or phosphorylation state of a given  
8 mRNA or protein was measured (if relevant)?  
9 c. Does the time series reflect data based on Zeitgeber Time (*DZT* or *CZT*)?  
10 d. Do the amounts reported in the time series come provide any information for  
11 limiting associated measurement errors? If yes, which types of errors are  
12 reported: the standard error of the mean (SEM), the standard deviation (SD) or an  
13 UnknownErrorMeasure (UKEM)?

14 2. Information about the method used to collect the time series

- 15 a. Which method was used to observe the time series?  
16 b. Which machines, reagents, and software were used?  
17 c. Which probes or antibodies and dilutions were used (if relevant)?  
18 d. Which calibrations were applied, both mathematically (e.g., raw values were  
19 scaled by the maximum value) and biologically (e.g., values measured are relative  
20 to a specific standard mRNA or protein)?  
21 e. How many repeats were observed, and how are those repeats defined?  
22 f. When was the first and last data point recorded (*CZT* or *DZT* with days)?  
23 g. How long did the overall experiment last (in hours)?  
24 h. How long were the intervals between observed data points (if regular)?  
25 i. At which specific times were observations recorded (if specified in the text of the  
26 study or clearly marked on the time series figure)?

27 3. Biological and environmental information about flies used to collect time series data

- 28 a. Were flies exposed to light:dark schemes other than 12:12 L:D?  
29 b. To which temperature were the flies exposed?  
30 c. How long were the flies entrained?  
31 d. How old were the flies?  
32 e. What were the genotypes of the flies?  
33 f. Which sex(es) of flies were used?  
34

35 In some cases, longer *Comments* directly copied from the text of a study were the most  
36 appropriate way of describing a given *Attribute* without introducing the potential for  
37 errors from paraphrasing. To avoid visual clutter and unnecessary bloating of the  
38 *TimeSeries AttributeTable* we introduced the notion of column locality, which is defined  
39 by a locality index column that is allowed to have identical values in consecutive rows  
40 and thereby define one *LocalColumn* for each such run of identical values. The purpose

1 of this construct is to provide a formal check for the use of the equivalent of ‘*ibid.*’ in  
2 FlyClockbase. For example, adding “See Method Comments, 2.5.1” in the column  
3 “Method Comments” at time series row 2.5.2 indicates that the longer comment stored  
4 in the row above (2.5.1) also applies to the next time series. To avoid loss of context,  
5 the FlyClockbase look-up keyword “See” must be followed by an indication of the  
6 column and row that are being referenced. To maintain readability for humans and  
7 simplify the implementation of code that understands *LocalColumns*, such pointers to  
8 previous cells of a column must not be interrupted by cells with unrelated content.

### 11 ***TimeSeries Traits* analysis of *Peaks* and *Valleys* refined by *ObsOdd* checks**

12  
13 We manually compiled a set of *SearchResultTables* that integrated a simplified set of  
14 *Attributes* describing the nature of a given time series. In addition, these included *Traits*  
15 that computed the respective times where amounts show a peak or a valley on the first  
16 observed day of an *ObsMod* time series in FlyClockbase. These *SearchResultTables*  
17 were termed ‘*PeakValleyTables*’ and constructed for each given mRNA and protein.  
18 Each row in a peak-valley table corresponds to one time series and records several  
19 *Attributes* (from the *SummarySection TimeSeries AttributeTable*, see Steps S6 in Figure  
20 2) and two *Traits* (peak and valley, from the *ObsMod TimeSeries ContentTables*, see  
21 Steps S7-S8 in Figure 2 and Figure 3). Each row also stores a day index, indicating the  
22 day during which the reported peak and valley were observed, counting from the start of  
23 the experiment (*CZT* = 0h). For example, a day index of two would indicate that peak  
24 and valley of the time series described by the *Attributes* in the row were observed  
25 between 24 and 48h *CZT* after initiating the observation of this time series.

26  
27  
28 Place FIGURE 3 about here.

29  
30  
31 **Measuring a limit for maximal peak time variance.** In an effort to limit  
32 mistakes rising from human error, we refined the initially constructed *PeakValleyTables*  
33 (‘*Raw*’) into a series of successively modified *PeakValleyTables* shown in Figure 3  
34 (‘*Mod1*’ – ‘*Mod6*’). To create the first set of modified *PeakValleyTables* (*Mod1*), we  
35 identified *PeakValleyTables* where the standard deviation of the peak value, valley  
36 values, or both was greater than six hours. We based this threshold on two control  
37 distributions. First, we created a uniform distribution with 25 artefactual regularly placed  
38 observations covering every hour of the day effectively starting at 0h up to the very end  
39 at 24h in 1h steps. This distribution had an average and median of  $DZT=12h \pm 7.36h$   
40 *SD*; omitting the first or last hour reduced the standard deviation to 7.07h. We also

1 randomly sampled 1000 values from a uniform distribution with a range from 0h to 24h.  
2 Repeating this exercise three times produced *DZT* medians of 11.66, 12.41, or 12.08 h,  
3 averages of 11.85, 12.47, 12.01 h and standard deviations of 6.81, 6.92, 7.02 h,  
4 respectively. We therefore concluded that observations of  $SD \geq 6h$  effectively indicate  
5 signals that are indistinguishable from randomly distributed impulses that are not  
6 oscillating in any discernably coordinated manner. Assuming that clock researchers  
7 were probably correct when they reported oscillations, we explored the hypothesis that  
8 such high variation *SDs* might have been caused by errors in acquiring or interpreting  
9 some aspect of the data.

10  
11 **Factors contributing to increased trait variance.** An important early insight  
12 was the necessity to exclude peaks or valleys that coincide with the first or last point of  
13 a time series. Although these points might appear to report the maximum and minimum  
14 expression of a clock component, the amounts following or preceding this value (not  
15 shown in the figure) could easily continue the local trend. For example, a time series  
16 figure could appear to show maximum expression at the final data point (e.g. 23 *CZT*)  
17 but reflect a system where the next theoretical data point (e.g. 25 *CZT*) corresponds to  
18 the “true” maximum expression. We excluded these time series and made additional  
19 corrections of observed human errors to construct the refined dataset *ObsMod1* from  
20 *ObsRaw*. This early success in using odd observations for detecting potential lower-  
21 level problems in datasets encouraged us to continue to investigate unusually extreme  
22 values, which we then defined as *ObsOdd* peak or valley times outside of the range  
23 defined by a given clock component’s observed  $Avg \pm 1 SD$ . Time series with *ObsOdd*  
24 in *Mod1* were recorded in the peak-valley table ‘*Odd1*’. After correcting mistakes in  
25 *Odd1*, we combined the corrected values from *Odd1* with the remainder of the data from  
26 *Mod1* to create *Mod2*. We repeated this cycle of checking for mistakes, recording  
27 unusual values in *Odd PeakValleyTables*, and fixing errors until we created the final set  
28 of modified and odd *PeakValleyTables*, *Mod6* and *Odd6*. In addition to correcting more  
29 unique human errors, we also made adjustments for these potential method-based  
30 sources of errors:

- 31  
32 1. *Local minima in peaks:* Some time series (e.g. 85.7.2, 65.1.3, 81.4.1) report a local  
33 minimum, where it is easy to intuitively suspect a peak. We only adjusted our peak  
34 estimate if (i) a peak was also expected based on other time series of the same  
35 clock component, and (ii) the data points on either side of the local minimum are the  
36 highest two values for the respective day in the time series. These local dips can  
37 result from measurements outside of linear reporting ranges for time series  
38 observation methods such as RNase protection assays (RPAs) and Northern Blots.  
39 Increases beyond their linear range no longer produce linear increases in the  
40 intensity of signals and might even decrease the signal if product inhibition

1 phenomena occur. We therefore suggest these local minima reflect measurement  
2 inaccuracies rather than actual decreases in amounts. To correct for this error, we  
3 recorded peak time as the average time of the two surrounding near-peak amounts.

- 4
- 5 2. *Luciferase initial spike*: Time series observed using luciferase (e.g. 62.2.1) may  
6 appear to report a peak shortly after starting to record data. The timing of this first  
7 peak can be inconsistent with peaks on other days in the same time series and other  
8 time series. Often the second peak has a *DZT* timing similar to peaks on subsequent  
9 days and in other time series. Such odd initial maxima are likely to be artifacts of the  
10 bioluminescence technique used to measure such a time series. They can be  
11 caused by an initial adjustment period that is required for accurate measurements of  
12 luciferase levels. Reported extra peaks occurs shortly after the arbitrary end of such  
13 initial periods (PLAUTZ *et al.* 1997; STANEWSKY *et al.* 1997). In such cases, we ignore  
14 the initial peak and record the values associated with the second peak on that day  
15 (as opposed to the technical maximum).
- 16
- 17 3. *Minimal Duration*: Some time series (e.g. see Figure\_IDs 43.1 - 43.6, 61.1 - 61.4,  
18 75.3) had a duration of twelve or fewer hours. Although minima and maxima can be  
19 read from such figures, their use is questionable, in particular, when the actual peak  
20 or valley times are not expected in the recorded time. Thus, we mark these peak or  
21 valley times as not given.

22

23 **Linearizing TimeSeries data.** The cyclic nature of circadian rhythms must be  
24 kept in mind when statistically describing the times of peaks or valleys in circadian time  
25 series. To illustrate this point, we will use data from the first day of *clk* mRNA time  
26 series. With no alterations, mean peak time estimates suggest  $DZT = 8.79h \pm 8.59h$   
27 (*SD*), which is indistinguishable from randomly distributed peaks (see above). Closer  
28 inspection of the data, however, shows that these values may be misleading.  
29 Calculating the mean and standard deviation depends on finding differences between  
30 values representing time, an operation that is substantially complicated by the circular  
31 nature of hours in a day, where the value of  $24h + 3 \text{ min}$  results in  $0.05h$ . This is in  
32 sharp contrast to any linear expectation. For example, the central peak times for the *clk*  
33 time series 35.2.1 and 35.2.2 (see Fig. S3B in KADENER *et al.* 2009) are observed at  
34 about *CZT* 23 and about *CZT* 27, respectively. Translating them into circular circadian  
35 time results in *DZT* 23 and *DZT* 3, respectively. If we then disregard the circular nature  
36 of these values, we might infer a time difference of 20h between *DZT* 23 and *DZT* 3.  
37 However, visual inspection quickly clarifies that the peak occurring at *CZT* 23 on the first  
38 day is close to the early peak of the following day, which occurs at *CZT* 27h given by  
39 the sum of (Day 1 *DZT* 24h) + (Day 2 *DZT* 3h). The difference between these peaks in  
40 time series 35.2.1 and 35.2.2 is thus more accurately calculated as  $CZT\ 27 - CZT\ 23 =$   
41 4h. The corresponding change is equivalent to a local linearization of time when some



1 part of the original day crosses over into the next or last day. Peak or valley times that  
2 have been linearized in this way are hereafter called “linearized.”

3 We manually linearized all values in the *Mod PeakValleyTables* by moving the  
4 minority of values to an earlier or later day (i.e. adding or subtracting 24 hours). Raw  
5 *PeakValleyTables* are not linearized. Our current way of linearizing is geared towards  
6 analyses of a single 24h period. Close direct visual inspection of all relevant time series  
7 and claimed peaks makes it reasonably easy to linearize other periods; here it is  
8 beyond our scope to conduct more general analyses. We found that linearization  
9 greatly increases the overall reliability of representations of groups of time series. This  
10 is of particular importance when estimating the variability of peak and valley times,  
11 which is easily inflated artificially by omitting the linearization step.

12 Table S1 demonstrates the differences that can result from calculating summary  
13 statistics for *Raw* (circular time, no value linearized) or *Mod* (linearized time) peak and  
14 valley times of selected types of mRNA and protein. Results show that median, mean,  
15 and *SD* of linearized times may (but are not required to) differ dramatically from those  
16 calculated for circular raw times. For example, the linearized mean peak time for *clk*  
17 mRNA occurs 6 hours before its circular raw equivalent. Similarly, the *SD* of linearized  
18 peaks is about one-third of the *SD* of peaks measured in raw circular time.

19 Comparisons to summary statistics of uniform random distributions (see above)  
20 are instructive; as a rule of thumb, peak and valley times (or any daily event times) with  
21 a standard deviation greater than six hours should be treated with suspicion; they might  
22 be difficult to distinguish from randomly distributed times or could be the result of a lack  
23 of linearization. The latter affects *Raw SD* values for *clk* mRNA peak time, PER protein  
24 peak time, and *per* mRNA valley time (Table S1), which are close to *SD* values for  
25 uniform randomly drawn samples. In contrast, after linearization, *SD* for these *Traits* are  
26 much more similar to the *SD* of *Traits* of other linearized time series. Overall, this and  
27 other experiences suggest that linearization is an important step in obtaining trustworthy  
28 summary statistics from circular values such as *DZT*, even though linearization makes  
29 no difference in cases where times are already linear (e.g. TIM protein peak with peak  
30 *CZT*  $18.41 \pm 2.54$  in Table S1).

## 31 32 33 **Statistical analyses**

34  
35 Our initial screening for variability of the *Traits* we call *Peak* time and *Valley* time  
36 (observed on day 1) surprised us by suggesting that variability might differ significantly  
37 among clock components. Given the various sources of spurious variability described  
38 above, we aimed to remove all artifacts that might randomly inflate variability estimates,  
39 including potential biases that might be introduced from analyzing more than the first  
40 day of a time series (after entrainment). Our interest in reproducible results and

1 disappointing experiences with large untested data collections has inspired various  
2 rounds of error checking and increasingly rigorous statistical analysis.

3  
4 **Automated analysis with R script.** The core results of our study (differences in  
5 variance between peak times of PER and TIM proteins) have been tested independently  
6 by three of us (KS, BH, LL). The most rigorous analysis is presented below and can  
7 easily be reproduced by running the script

8 `FlyClockbase_PER_TIM_Methods_PeakValley_Comparisons_2016.txt`  
9 which is provided in the Supplemental Material along with input files and the  
10 Supplemental Statistical Analysis, which is an annotated PDF, collating all pdf output  
11 from our plotting and analysis script. We executed the script on R version 3.2.4 (as of  
12 2016-03-10, <https://www.r-project.org> ). It requires the package “`data.table`” and the  
13 library of robust statistical testing functions implemented by this script

14 `http://dornsife.usc.edu/assets/sites/239/docs/Rallfun-v30.txt`  
15 All statistical analyses used data from *PeakValleyTables*, where our final results are  
16 taken from *ObsMod6* (see Figure 3 and text above). All corresponding input files are  
17 provided next to the R script and are denoted as *ObsMod7* and *ObsMod8* as described  
18 in the code. Times are given in *CZT* and have been linearized as described above.

19 While the script contains numerous comments, it does not attempt to be elegant  
20 code. Much of its over 12,000 lines appear at first glance to be repetitive with small  
21 variations. It is currently not clear how to simplify the documentation of this script or  
22 whether the time required for substantial code improvements would be well invested.  
23 The trade-off between readability and coding time is further discussed in the R-code  
24 and Supplemental Material under the approach to documenting code denoted as  
25 ‘DISCOVARCHY’-style.

26  
27 **Outlier analysis.** We addressed above those irregular values in *ObsOdd* that  
28 were demonstrably due to human errors from data processing, removing them from  
29 considerations below. Due to the substantial variability of the reported time series and  
30 the diversity of measurement methods used to collect them, we were concerned that a  
31 few substantially different outliers might obscure a robust trend exhibited by the majority  
32 of observations. Thus, we used the following three different approaches for testing the  
33 impact of outliers when analyzing Trait *X* by removing as outliers all values  $X_i$ , where

- 34 (i)  $X_i$  is outside of the range of non-outliers given by  
35  $(q_1 - 1.5 * IQR) < X_i < (q_3 + 1.5 * IQR)$ , where  $IQR = (q_3 - q_1)$  is the  
36 Inter-Quartile Range, and  $q_i$  are the corresponding quartiles,  
37 (ii)  $X_i$  is identified an ‘extreme value’ by close visual inspection and its extreme  
38 difference to equivalent observations. This manual approach removed Protein time  
39 series 14.1.1 for TIM, and 43.2.1, 43.3.1, 43.5.1 for PER, but none for the  
40 corresponding mRNAs (see the *BestNoXtrem* input for the R-script above),

1 (iii)  $X_j$  is identified as an outlier by Carling's modification to the standard boxplot  
2 approach (CARLING 2000; WILCOX 2012). This technique uses sample size to adjust  
3 the range of outliers to account for the tendency to identify a greater number of  
4 outliers at smaller sample sizes. We used the implementation described by Wilcox  
5 (2012, see section 3.13.3 and 3.13.5 on p.97-98 as implemented in his R script  
6 "Rallfun-v30.txt" as function "outbox" when called with parameters  
7 "mbox=T, gval=NA", so that his eq. 3.45 on p.97 is applied). This method is  
8 applied to the data analyzed by our R script described above.

9  
10 **Testing differences in variance.** To test whether differences in variance are  
11 statistically significant at the level of  $\alpha = 0.05$ , we ran 100,000 bootstraps of the  
12 percentile bootstrap method implemented by the function "comvar2" in the R script  
13 "Rallfun-v30.txt", as described by WILCOX (2012) on p.175, section 5.5.2 and  
14 elsewhere (WILCOX 2002). This function provides a 0.95 confidence interval for an  
15 estimate of the difference between the variances of two groups, but was implemented in  
16 a way that only detects significance at the 5% level (without giving  $P$  values). We used  
17 this newer, more robust method to avoid problems associated with older methods such  
18 as Levene's test (NORDSTOKKE AND ZUMBO 2007).

19  
20 **Testing differences in mean.** To test for 95% confidence in significantly  
21 different locations when comparing distributions, we used (i) the Mann-Whitney-U test  
22 as implemented in R (`wilcox.test`, 2 sided, unpaired), (ii) calculated 100,000  
23 bootstraps of the "bootdpci" difference as described on p.202 in section 5.9.12 of  
24 WILCOX (2012), and (iii) 100,000 bootstraps of the "medpb2" difference of medians as  
25 described on p.174 in section 5.4.3. of WILCOX (2012). Additional details of the function  
26 calls are easily found in the source code of our R script that performs these calculations;  
27 the results are given in the PDF output of this script, which is also available online as  
28 collated and annotated Supplemental Statistical Analysis.

29  
30 **Supplemental Statistical Analysis.** The same R script produced the results  
31 plots shown in the main text below and the 81 pages of auto-generated plots shared  
32 with 6 additional pages for navigation as Supplemental Statistical Analysis in the  
33 Supplemental Material. It was generated by combining various snippets of code to test  
34 for all combinations of input data, outlier removal, observed *Traits*, molecule types and  
35 genes. This resulted in 32 distributions, combining the following features: input data  
36 (with and without the manually identified *BestNoXtrem* outliers), outlier removal (with  
37 and without applying Carling's outlier removal), and all combinations of *Traits* (peak,  
38 valley), molecule type (mRNA, Protein) and gene (*per*, *tim*). Method comparisons  
39 employed the same set of statistical tests for comparing locations and variances of two  
40 distributions (PCR vs non-PCR).

## RESULTS

### Experimental observations used in modeling

In addition to experimental results, our extensive literature review identified 66 studies published since 1995 which focused on modeling the *D. melanogaster* core circadian clock. Figure 4 shows that about 75% (50/66) of all modeling studies reuse parameters reported in other modeling studies. Of the remaining studies, 13 relied exclusively on abstract time series traits for estimating parameters, two used exclusively direct experimental observations of time series data (KUCZENSKI *et al.* 2007; FATHALLAH-SHAYKH *et al.* 2009), and one did both (LEISE AND MOIN 2007). In addition, one study reused parameters from one of the three studies mentioned above. Thus, only 6% (4/66) of all simulation studies were based on direct experimental observations of time series. This does not include the 13 studies that estimated parameters from abstract traits. The substantially different numbers in each category might reflect difficulties inherent in curating and incorporating experimental data into clock simulations (see above Section on Models). We experienced first-hand many such difficulties. Although models will never perfectly simulate reality and ‘validation’ is impossible on principal grounds (ORESKEs *et al.* 1994; BEERSMA 2005), we maintain that direct experimental evidence is critical for increasing the relevance of models aiming to understand reality. Facilitating the construction of more reliable models by including more direct observations motivated us to build FlyClockbase. We found that FlyClockbase also enables interesting retrospective meta-analyses, some of which we report below.

Place FIGURE 4 about here.

*FIGURE 4. Where do models get their realism from?*

Place FIGURE 5 about here.

*FIGURE 5. Overview of experimental studies available in FlyClockbase and their use for parameter estimation over time.*

## FlyClockbase is a new resource enabling studies of circadian clock time series

FlyClockbase includes 403 time series covering 20 different mRNAs and proteins (13 and 7, respectively). An overview of its data model is given in Figure 2, relevant abbreviations are summarized in Table 2. Table 3 shows its number of time series and published studies corresponding to each type of mRNA or protein in FlyClockbase. Figure 5 summarizes publication years from 1990 to 2015 for its 86 experimental studies observing time series of clock components. Figure 5 highlights publication years of the 16% (14/86) experimental wildtype observations used to directly inform 5% (3/66) of all computational model studies of *D. melanogaster* circadian clocks (see Figure 4).

Place TABLE 3 about here.

**Hypothesis testing.** FlyClockbase enables the study of many diverse biological questions, making it impossible to present all corresponding biological results here (see Discussion of using FlyClockbase for hypothesis testing). The analysis of most biological questions, however, requires the computation of relevant *Traits* from the time series stored in FlyClockbase. These *Traits* then need to be combined with the relevant *Attributes* of the corresponding time series to form a row in the table of search results (see Figure 2). We named these *PeakValleyTables*, since we constructed one for each clock component in order to focus exclusively on analyses of the circadian timing of the first peak and the first valley of each time series (defined by the respective maximal and minimal amounts during the first day). After initially establishing FlyClockbase and estimating the variability of all clock components, we limited the scope of this study to the following two biological questions:

- (i) Comparing the variability of daily peaks and valleys of *per* and *tim* mRNA and protein, are there statistically significant differences in variance across independent time series?
- (ii) Which differences (if any) occur in the timing of *per* mRNA peak times based on different methods of observation?

We picked these specific questions because the initial release of FlyClockbase contained the largest numbers of time series for these four components (ordered by count we used 89 time series for *per*, 77 PER, 51 *tim*, 42 TIM). Thus, FlyClockbase enables comparisons of variability of independently collected time series of circadian clocks.



1 variability. As explored in the Discussion, attempts to detect and correct errors in  
2 author-labs and distinguishing them from other potential sources of variability was  
3 beyond the scope of our study. Thus, our goal was to be able to confidently exclude  
4 errors during the capture and processing of data on our side. We defined as error in this  
5 context any result that did not hold up to scrutiny, when rechecked using the rules we  
6 had agreed on for processing time series data. These rules were set up after we gained  
7 substantial experience with various counter-intuitive aspects of the data, as documented  
8 in this study. Thus, our definitions of error were not arbitrary and therefore allow us to  
9 contribute below a specific estimate of human error rates to the broader area of human  
10 error analysis (see Discussion below).

11 Databases curated by human experts usually have substantially lower error rates  
12 than those that were automatically compiled (SCHNOES *et al.* 2009; KOSKINEN *et al.*  
13 2015). Still, the dangers of error accumulation in heterogeneous collections of data  
14 contributed by humans are well known (CARTHEY *et al.* 2003; ZEEBERG *et al.* 2004;  
15 PANKO AND AURIGEMMA 2010; PANKO 2016). It thus appears desirable to increase the  
16 number of human error estimates available for biological information resources. The  
17 analysis discussed next provided a unique point estimate of the error rates users might  
18 want to expect when working with manually compiled resources of similar complexity. A  
19 more thorough analysis of errors is beyond the scope of this study (and is likely to be  
20 substantially affected by the compiler techniques discussed below). Nevertheless, our  
21 results below support our claim that our main findings are probably not the result of a  
22 unlucky confluence of statistical flukes generated by errors we could have detected  
23 when reanalyzing the same data carefully.

24  
25 **Quality control in FlyClockbase and *TraitTables*.** In order to detect and  
26 reduce the number of errors in the *PeakValleyTables* used for computing variability, we  
27 conducted four rounds of identifying values outside of the range defined by the mean  $\pm$   
28 1 *SD* of a *Trait* (*Mod2*, *Mod3*, *Mod4*, *Mod5* in Figure 3); this was done for all clock  
29 components in FlyClockbase and serves as the basic way of introducing all new data.  
30 We used this as the starting point for obtaining the error estimates reported here. Since  
31 time series *TraitTables* and search results tables are not strictly part of FlyClockbase  
32 (see Figure 2), we separated our error estimates of FlyClockbase from those obtained  
33 for *TraitTables* (see Results below) to improve the quality of our estimates. In a unique  
34 effort, we then re-examined in-depth all relevant content, attributes and traits of each  
35 time series that informed the four most important *PeakValleyTables* (*per* mRNA, *tim*  
36 mRNA, PER protein, and TIM protein). We scrutinized each value representing a peak  
37 or valley time. This required a substantial effort, which aimed at a twofold goal:

- 38  
39 (i) removal of errors for improving our estimates of variability differences, and

1 (ii) providing an approximate estimate for the numbers of similar errors that users of  
2 FlyClockbase (or similarly complex data resources) might expect in other areas,  
3 where such error rates have not yet been determined.  
4

5 Before presenting our findings, we submit to the reader that the researchers compiling  
6 FlyClockbase had been very conscientious, brought a high degree of expertise and  
7 enthusiasm to the project, and did their very best to avoid mistakes. Thus we thought  
8 conditions were favorable and we were not sure if we would find errors. Unfortunately,  
9 aiming to avoid and correct mistakes does not protect against the inevitable occurrence  
10 of mistakes at low but predictable rates (see Table 5 and Discussion).  
11

12 Place TABLE 5 about here.  
13

14 **Basic Null-Hypothesis  $H_{basic}$ .** FlyClockbase includes a particularly large number  
15 of repeatedly observed time series of *per* and *tim* mRNAs and proteins in wildtype (and  
16 wildtype-like) circadian clocks of *D. melanogaster*. These time series were recorded as  
17 wildtype control experiments while observing the effects of mutants in order to explore  
18 circadian clock functions. We expect corresponding wildtype controls to produce similar  
19 time courses that differ only by inevitable stochastic effects – in the absence of  
20 experimental complications. Such complications would make flies non-comparable  
21 across studies (see Discussion of potential causes, such as variable natural genetic  
22 diversity across fly strains, developmental diversity, unknown environmental impact on  
23 measurements, and others). We start by ignoring all such potential complications. Our  
24 aim is to initially work with the simplest model that still appears somewhat useful. We  
25 define a corresponding basic null-hypothesis  $H_{basic}$  to inform our background time series  
26 expectations and enable a defined starting point for hypothesis testing with the help of  
27 appropriately selected data in FlyClockbase. In light of the types of observations and  
28 available calibrations, we define  $H_{basic}$  as:  
29

30 *The basic time series type in FlyClockbase is determined by the molecule type*  
31 *observed and its context, which for  $H_{basic}$  is defined as the central core clock of*  
32 *wildtype organisms of a defined taxonomic unit (like *D. melanogaster*) under*  
33 *standard experimental conditions.  $H_{basic}$  excludes time series that are (i) from*  
34 *non-LD 12:12 observations, (ii) affected by the presence of mutations known to or*  
35 *intended to alter the clock, (iii) measuring non-central circadian clocks that are*  
36 *independent or merely derived from an organisms' central clock, and (iv) any*  
37 *complications from genotypes, phenotypes, environments, methods, or more.*

38 **For these basic time series types defined above, FlyClockbase reports as**  
39  **$H_{basic}$  the ensembles below containing either dynamically changing amounts of**  
40 **a specified molecule type, or values of corresponding time series traits.**



1            *These ensembles of the most reliable observations in FlyClockbase are based*  
2            *on time series that satisfy the following conditions: (i) Timed amounts are reported*  
3            *as uncalibrated, relative measurements, which allow comparisons only within each*  
4            *time series, not between time series. (ii) Comparisons of observed amounts indicate*  
5            *all potential outcomes by drawing on as much evidence as possible and extracting*  
6            *as much quality as reasonable from the available data. This requires that*  
7            *comparisons define a method of incorporating such data appropriately. This data*  
8            *includes quantifications of uncertainty in methods of measurement, observational*  
9            *errors, replicates, accuracies of timed amounts, and methods of inference. (iii) When*  
10           *using  $H_{basic}$ , all relevant details need to be documented, including the data available*  
11           *at the time, its state of refinement (ObsMod+), and the methods used.*  
12           *Documentation requires specifying their stabilizing versioning numbers as defined by*  
13           *the StabilizingZone of the POST system (see Table P1 in Supplemental Material).*  
14           *(iv) Any observations included in either ensemble type exclude outliers using*  
15           *Carling's method (2000) to enable a focus on typical clocks.*

16            ***Satisfying all these conditions,  $H_{basic}$  assumes that the remaining variability***  
17            ***of observed amounts or traits is only caused by the natural stochasticity of***  
18            ***discrete molecular events inside of individual cells.***

19  
20  $H_{basic}$  is a powerful starting point for exploring clock biology. Next, we will use  $H_{basic}$  to  
21 compare typical  $H_{basic}$  behavior of time series traits observed in different clock  
22 components. We then relax assumptions of  $H_{basic}$  to illustrate how FlyClockbase can  
23 generate a variety of hypotheses about diverse subtleties that might be important for  
24 generating high-quality observations of circadian clocks.

## 27 **Hypothesis on Peak time variances: PER exceeds TIM**

28  
29 We initially screened for variability in the peak and valley times of all clock components  
30 available (see Table 4). This analysis revealed substantial differences between the  
31 standard deviations of peak times observed for PER and TIM respectively highlighted in  
32 Figure 6. We hypothesized that these differences could have mechanistic causes and  
33 might thus point to new insights into clock mechanisms (see Discussion). Before  
34 exploring such mechanistic models, we wanted to know, whether our observations were  
35 (i) statistically significant and (ii) not caused by low-level errors in data handling during  
36 the construction of FlyClockbase in light of corresponding challenges with data quality  
37 (McCALLUM 2013) as faced by many biological information resources (see Discussion  
38 and Supplemental Material for more details).

39  
40 Place **FIGURE 6** about here.

1  
2 Place FIGURE 7 about here.  
3  
4

5 **Data quality.** Since variances are easily inflated by outliers caused by errors in  
6 data handling, we aimed to obtain assessments of peak and valley times that were as  
7 accurate as possible given the observations reported by the studies in FlyClockbase.  
8 The desire for improving the overall rigor of our variability assessment motivated the  
9 various procedures described above for identifying outliers and investigating potential  
10 errors that might have artificially inflated estimates of variability. Thus, we manually re-  
11 inspected all steps of inference for each peak and valley data point that contributed to  
12 our final calculations of timing statistics. We started with the already highly refined  
13 dataset *ObsMod5* and created *ObsMod6* by correcting all irregularities from data  
14 handling or processing on our side that we could detect in FlyClockbase or our  
15 *TraitTables* (see Figure 3). Starting from the figures of publications, we checked the  
16 results of all our manual operations that could have modified traits, up to the final values  
17 used as input for our R script that produced Figure 7. The statistics of the resulting  
18 human error analysis is shown in Table 5.

19 *Main analysis with outlier robustness.* We decided to carefully investigate the role  
20 of outliers when analyzing variance in order to arrive at robust conclusions. We were  
21 motivated by the following considerations:  
22

- 23 1. *Use of robust statistics.* We aimed to use state-of-the-art statistical methods  
24 designed for delivering robust conclusions that minimize the chances that a few odd  
25 values have an unduly large impact on the overall conclusions (see Wilcox (2012)  
26 for an introduction to robust estimation and hypothesis testing).  
27
- 28 2. *Dealing with rare ObsOdd.* As described above, we checked and re-checked all  
29 observed peak and valley times that entered our final comparisons between *per* and  
30 *tim* components, aiming for the best interpretation of each reported time series.  
31 Despite this scrutiny, there were four observed time series that we could not  
32 interpret convincingly. All four extreme values pertain to protein peak time, with one  
33 extreme for TIM (time series ID 14.1.1, peak at 6.966h linearized CZT) and three  
34 extremes for PER (time series IDs 43.2.1, 43.3.1, and 43.5.1, all with a peak at 28h  
35 linearized CZT and all from one study). All four also showed a clear signal in their  
36 original figure that appeared to have been analyzed correctly (based on our reading  
37 of the respective studies), yet all four reported times appeared to be clearly distinct  
38 from the distribution of times reported by all other similar studies. For example, TIM  
39 extreme outlier time series above observed a peak almost exactly 12h away from  
40 the mean of the equivalent TIM distribution of peak timings without outliers. While we  
41 could not find any indication that morning and evening had been flipped in the  
42 corresponding study, it is very difficult to exclude such human errors in light of the

1 many challenges that easily frustrate data analyses in spreadsheet software (see  
2 Discussion below). We stopped further attempts of re-interpretation, since the  
3 original raw data was not publicly available. As revisited in the Discussion, these  
4 values could represent any of the following: genuine observations of typical behavior  
5 of rare fly clocks, rare behavior of typical fly clocks (at least sustained for the length  
6 of the time series), some rare combination of measurement protocol details that  
7 conspired to systematically bias observations (which were correctly interpreted), or  
8 human errors leading to misinterpretations in the complex chain of time series  
9 observation and analysis. We could not find similarly extreme outliers in  
10 corresponding observations of mRNA. We consider the overall evidence to be too  
11 incomplete, contradictory and therefore inconclusive to determine which process  
12 may contribute most.

13 Observing these extreme outliers might raise the distant possibility that apparent  
14 wildtype circadian clock systems can exhibit extreme deviations from their normal  
15 timing behavior in a few percent of occasions. However, exploring the possibilities of  
16 such exotic behaviors is beyond the scope of this study and not possible without a  
17 more elaborate error-management for observation and analysis of time series in  
18 circadian clock studies. It would also require a substantial number of individual time  
19 series observations in the *DetailSection* of FlyClockbase to enable the independent  
20 computation of summary statistics.

21 To test whether these handpicked extreme outliers made a difference to our  
22 conclusions, we grouped and denoted them in our Statistical Methods Section as  
23 ‘outlier removal approach (ii)’. We then created a parallel analysis track in our R  
24 script that took every computation on the full dataset (*Mod7*) and repeated it on a  
25 manually created copy of the input files (*Mod8*), where this manual outlier removal  
26 approach (ii) had been applied. To increase clarity, *Mod7* or *Mod8* are also  
27 labeled, respectively, “*BestEachObs*” or “*BestNoXtrem*” in our R code, and “with  
28 Extremes” or “no Extremes” in the titles of the automatically generated plots. (*Mod7*  
29 is essentially identical with *Mod6* except for trivial changes to facilitate automated  
30 reading from R; the *Mod7* and *Mod8* files are only stored next to our R script that  
31 reads them as input, they are not stored in the main time series trait folder).

32 As can be seen in the Supplemental Statistical Analysis online, the removal of  
33 these four specific time series does not substantially change our conclusions.  
34

- 35 3. We were unsatisfied with the subjective nature of the decisions summarized above  
36 as ‘outlier removal method (ii)’. While extreme outliers are reasonably easy to detect,  
37 there is a gradual transition to less extreme values, where subjective decisions  
38 about the inclusion of particular time series could easily lead to a new set of  
39 problems by creating ascertainment biases that are impossible to correct for  
40 statistically. Thus, we decided to employ a principled method. After some

1 experimentation, we arrived at outlier removal approach (iii) which has been  
2 described elsewhere (CARLING 2000; WILCOX 2012); see Statistical Methods.

3  
4 Our results in Table 6 report our current best analysis of the most reliable data on the  
5 variability of *per* and *tim* protein and mRNA peak and valley timing accessible to us in  
6 FlyClockbase. For the reasons given above, we decided to exclude outliers as identified  
7 by our approach (iii) see Materials and Methods (CARLING 2000; WILCOX 2012).

8  
9 **Alternative handling of outliers.** In the Supplemental Statistical Analysis we  
10 compared results after removing outliers using approach (iii) as shown in Table 6 with  
11 those obtained from the full dataset to investigate whether removing outliers affects  
12 conclusions. Given the extraordinary range of timing variability for the peaks of PER and  
13 TIM, it is unsurprising that the difference in variance reported in Table 6 loses statistical  
14 significance when outliers are included. In Table 7 we summarize our results of  
15 comparing different outlier approaches. Corresponding values for all other results in  
16 Table 6 can be extracted from the Supplemental Statistical Analysis.

17 We conclude from Table 6 that the majority of circadian clocks in *D.*  
18 *melanogaster* are significantly more variable in their timing of PER peaks in comparison  
19 to TIM peaks ( $P < 5\%$ ). In a minority of cases outliers can introduce such large amounts  
20 of variability that indicators of significance are swamped and a loss of significance is  
21 perceived (see Table 7 and Discussion). All other comparisons shown in the  
22 Supplemental Statistical Analysis confirm this overview. Our observation of significant  
23 differences in variability contrasts with the near absence of differences in the average  
24 timing of these peaks.

25  
26 Place TABLE 6 about here.

27  
28 Place TABLE 7 about here.

29  
30  
31 **Other peak comparisons.** We find differences in the variability of mRNA peak  
32 times, albeit interestingly with inverted sign, compared across *per-tim* equivalent parts.  
33 This means that significantly lower variability in *per* mRNA peaks precedes significantly  
34 larger variability in *PER* protein. Conversely, significantly larger variability in *tim* mRNA  
35 precedes significantly lower variability in *TIM* protein. This flip indicates that the  
36 differences in variability of the peaks for PER and TIM are not caused by corresponding  
37 differences in the variance of their mRNA peaks. We therefore conclude that these  
38 differences are caused by mechanisms affecting variances of peaks in the causal  
39 reaction networks after the transcription of *per* and *tim*. These differences in variance  
40 contrast with non-significant differences in the average peak timing of the same peak  
41 time distributions.

1  
2       **Valley comparisons.** The valleys of PER and TIM occur at significantly different  
3 average times, irrespective of how many outliers are included. However, the non-  
4 significant differences in variances reported in Table 6 become barely significant at the  
5 5% level when adding the two outliers observed in TIM. When comparing the valleys of  
6 *per* and *tim* mRNAs, we found significant differences in average time; *per* valleys  
7 precede *tim* valleys, even though averages do not differ among peaks. Valleys of *per*  
8 and *tim* also showed significant differences in variance, with *per* being more variable  
9 than *tim*. We also report an inversion of variances when compared to their  
10 corresponding mRNA peaks. Our results for the valleys of *per* and *tim* mRNAs are not  
11 impacted by outliers, since none of our approaches to outlier analysis could identify any  
12 outliers among the 24 and 20 observations in FlyClockbase, respectively.  
13

### 14 15 **Comparing methods for measuring *TimeSeries* of *per* mRNA**

16

17 In addition to comparing different clock components, FlyClockbase can contrast  
18 experimental details that differ between independently observed time series of the same  
19 clock component. These experimental details are stored as *TimeSeries Attributes* in  
20 FlyClockbase and used for extracting corresponding sets of *TimeSeries* or *TimeSeries*  
21 *Traits* for additional statistical analyses. Here we compared *per* mRNA time series  
22 recorded by different measurement methods. We chose *per* mRNA because it is the  
23 most common time series in FlyClockbase and thus provides the largest statistical  
24 power for detecting potential systematic biases. Given the differences in variances  
25 between clock components reported above, we wanted to know if such differences  
26 could have been produced by using different methods of obtaining time series.  
27

28       **Measurement methods:** The following five measurement methods were used to  
29 collect at least three *per* mRNA time series in FlyClockbase: microarray, nascent-seq  
30 and RNA-seq, PCR, RNase protection assays (RPAs), and Northern Blots. Two of the  
31 four time series measured with microarrays were outliers, and all four of the time series  
32 measured with RNA-seq or nascent-seq were from a single study. These time series  
33 were consequently eliminated from our analyses. Many time series did not include a  
34 valley time for *per* mRNA, so we focused solely on *per* peak time.

35       *Comparing means:* As expected, we could not find any significant differences in  
36 the averages of peak times observed by different measurement methods when  
37 comparing PCR vs Northern Blot, PCR vs RNase Protection Assay (RPA), and  
38 Northern Blot vs RPA (using the Mann-Whitney-U test at the 5% level, see  
39 Supplemental Statistical Analysis).

1            **Comparing variances:** We found significant differences in variance (using  
2 *comvar2*) to compare measurement methods as above. Comparing the combined peaks  
3 from time series measured with any PCR method to the pool of those measured with  
4 RPA or Northern Blot resulted in significantly different variances for both. The 95% CI of  
5 differences of variance reported by *comvar2* after  $10^5$  bootstraps for RPA and Northern  
6 Blots are 0.4413 to 6.817 and 0.4764 to 10.586, respectively (for explanation on extra  
7 digits, see Table 6). The histograms of the corresponding distributions are given in  
8 Figures 8A and 8B.

9  
10                                                  Place    FIGURE 8 ABCD                          about here.

11  
12  
13            The differences in variances are strongest for peak times measured with PCR or  
14 Northern Blots. Comparing the nine qPCR observations with the nine Northern Blots  
15 showed significantly higher variance in qPCR observations (*comvar2*,  $10^5$  bootstraps,  
16 95% CI for differences in variance: 0.353 to 7.598). Likewise, the 16 RT-PCR  
17 observations in FlyClockbase are more variable than the nine Northern Blots (*comvar2*,  
18  $10^5$  bootstraps, 95% CI for differences in variance: 0.46889 to 11.486). As reported  
19 above, comparing peaks from PCR to those from RPAs showed significant differences  
20 in variance. We expected this pattern to hold also for non-pooled PCR, but found results  
21 to be no longer statistically significant. Each type of PCR had a very skewed distribution  
22 of differences in variance with a substantial bias similar to that of Northern Blots (see  
23 *comvar2* results in the Supplemental Statistical Analysis). However, reduced sample  
24 size diminished statistical power, so differences are no longer significant.

25  
26            **Method references.** We were surprised by the larger variance in PCR results  
27 compared to results from non-PCR methods. We speculated that this might not  
28 necessarily be inherent to PCR but could be caused by a larger diversity of method  
29 protocols. If this were general, we would expect studies with shared method protocol  
30 references to report results with less variability than studies which did not share such  
31 references. Therefore, in studies that did not cite any method references, we might  
32 suspect a larger diversity of method protocol variants, and thus more diverse results.

33  
34                                                  Place    FIGURE 9                          about here.

35  
36            Figure 9 provides detailed information about the method protocol references  
37 cited in the studies we used. As before, we focused on the peak times of individual time  
38 series as observed by PCR, RPAs, or Northern Blots. Some authors largely followed the  
39 methods outlined in other referenced studies, while others only incorporated protocol  
40 references for specific aspects such as probe development, the use of controls, or RNA

1 extraction (see classification key in the caption of Figure 9 for a list of some  
2 methodological aspects that might be of interest).

3 Table 8 provides summary counts of the time series represented in the various  
4 broader categories of Figure 9 and the number of studies that observed them. Table 8  
5 also provides summary counts of the time series from studies that either share or don't  
6 share references with each other (along with the corresponding numbers of studies; this  
7 classification excluded studies with no references). The underlying network of protocol  
8 identities is represented in Figure 9, and histograms of the corresponding distributions  
9 are given in Figure 8CD.

10  
11 Place TABLE 8 about here.

12  
13 *Presence or absence of method references:* We grouped all analyzed time series  
14 into two categories, which might be nicknamed “*Any Method Ref*” if their studies  
15 provided at least one reference for details of the experimental protocols used to observe  
16 time series using a given broad type of method, or “*No Method Ref*” if not a single  
17 relevant experimental protocol reference was given. Comparing average peak times  
18 among these groups showed no significant differences and no detectable indication of  
19 bias (Mann-Whitney-U test, 95% CI: -1.00 to 1.00,  $p = 0.736$ ). While differences in  
20 variance were not significant, a clear bias in variance was noticeable in the distribution  
21 of differences, possibly indicative of significance if higher sample sizes were available  
22 (*comvar2*,  $10^5$  bootstraps, 95% CI for differences in variance: -1.385 to 5.6876).

23 *Presence or absence of shared method references:* We subdivided all available  
24 time series with at least one method reference into those with and without shared  
25 method references (see Figure 9 and Table 8). Average peak times did not change  
26 significantly if method references were or were not shared, but some bias could be seen  
27 (Mann-Whitney test, 95% CI for difference in location: -2.00 to  $5.4208 \times 10^{-5}$ ,  $P = 0.1829$ ).  
28 Similarly, variances of peak times showed bias but were not significantly different  
29 (*comvar2*,  $10^5$  bootstraps, 95% CI for differences in variance: -1.1045 to 6.325, see  
30 Supplemental Statistical Analysis).

31  
32 **Reduction of statistical power by application of inappropriate logic?** The  
33 last groups above had both clear biases in their differences in variance as revealed by  
34 *comvar2*, but neither test was significant at the 5% level. Combining both results in a  
35 slightly different way might increase relevant sample sizes and significance. As shown  
36 in Figure 10, we currently exclude studies with not a single method reference from our  
37 analysis of studies with shared references. We initially justified this by assuming that  
38 method references must be present for deciding whether studies could have used the  
39 same methods at the lab-bench or not. It turns out that this line of reasoning might say  
40 more about the need for greater clarify in logic formalisms than about the effects of

1 sharing references or not. We will next make explicit, what we unknowingly implied  
2 above; we do so in order to demonstrate the difficulties of creating clear statements in  
3 words chosen *ad hoc* and aimed at clarifying statements in a limiting logic formalism.

4 Above we assume implicitly that a study without any method protocol references  
5 may or may not have used the exact same methodological procedures as another study  
6 without method references. Applying Boolean logic here attempts to force a

7  
8 Yes (OK)

9 No (KO)

10  
11 answer to the question about the use of a common protocol. This logic fails here,  
12 because it does not allow us to specify that we cannot provide any certain answer  
13 based on the absence of a reference (we cannot exclude the possibility that two studies  
14 may have shared the same protocol). Instead, we might consider the BioBinary logic  
15 that FlyClockbase is adopting from Evolvix (see Supplemental Material). This is a step  
16 forward, because it can distinguish the cases of

17  
18 MIS ('inapplicable' because 'no-method-given')

19 OKO ('somewhere between OK and KO')

20  
21 from the other cases (OK/KO), where we can reach relatively more clear decisions  
22 because method protocol references are given. Our statistical analysis above can now  
23 be rephrased as stating that the absence of a reference is a BioBinary 'MIS' (since we  
24 formally cannot answer the question due to a missing value). As a result, we would  
25 exclude such values, since it is always easy to name multitudes of irrelevant values that  
26 clearly should not have any influence on our analysis. This interpretation might appear  
27 unsatisfactory at first, but it is still a step forward, because it is explicitly stated and  
28 therefore more tangible, which might attract further scrutiny.

29 If explained clearly, most experimental biologists will probably not hesitate to  
30 point out that the chances of using identical experimental protocols in the lab are  
31 miniscule unless there is a shared reference to a common protocol (which would  
32 probably be referenced). There are simply too many variations that are done most  
33 easily. Thus, instead of assuming the absence of evidence (which might allow for  
34 shared protocols, even if no references are given), we can assume evidence of absence  
35 (since it is rather unlikely that two labs use the same procedures, without sharing  
36 references to a common protocols). Given the many variations of PCR that are easily  
37 created in the absence of further detailed instruction, it is difficult to see, how labs might  
38 accidentally share procedures. Thus, technically, this case must be classified as a  
39 BioBinary OKO; however, overwhelming evidence suggests that a KO (not sharing) is  
40 much more likely.



1            **Result:** These considerations suggest that it would be more appropriate to add  
2 the time-series with no references to the group of those that have only one (non-shared)  
3 reference. This might increase statistical power enough to make tests significant that  
4 compare “shared vs not shared references”. Pivotaly, these considerations  
5 demonstrate the importance of using the right type of logic and type system. It is easy to  
6 miss important points in Boolean logic without appropriate visualization. Since logic  
7 formalisms are best automatically supported at the compiler level, a step change in  
8 speed and quality of many biological analyses could be facilitated by a compiler that  
9 correctly map BioBinary and more expressive logic formalisms to data – out of the box.  
10 This conclusion is general for the construction of VBIRs, and independent from the  
11 particular outcomes of any specific tests that might be performed, because the  
12 existence of such unresolved difficulties in representing formal logic can easily create  
13 bugs that bind large amounts of research time, which could otherwise be dedicated to  
14 VBIR development.

15  
16                                                 Place   FIGURE 10    about here.

17  
18  
19            **Comparing methods by study to reduce multiple comparisons.** Figure 9  
20 shows that a single study often reports multiple time series, which could bias the results  
21 above (based on analyzing each time series individually without grouping into studies).  
22 Thus, big studies contributing many time series might exert an unduly large influence on  
23 the results. For example, nine of the 25 time series measured with PCR (36%) are from  
24 a single study (MAJERCAK *et al.* 2004), but this study is only 1 of 13 (7.7%) that used  
25 PCR to measure *per* mRNA. Given the many complexities of this system, the most  
26 appropriate way to address this problem is unclear. Treating each time series  
27 independently might give large studies too much influence. However, using only a single  
28 value from each study (e.g. the mean), irrespective of how many time series it  
29 represents, could give small studies too much weight and thus risk adding irrelevant and  
30 noisy artificial variance. The latter approach is therefore an extreme approach of  
31 countering potential problems with the former. We used this alterative study-based  
32 approach to explore the robustness of our conclusions about measurement methods,  
33 albeit with the added caution that the loss off statistical power might be too large for  
34 reaching clear conclusions.

35            Indeed, using only a single average value from each study reduces the remaining  
36 statistical power so much that no result remains significant (see Supplemental Statistical  
37 Analysis). It is worth noting though that some comparisons of variance still showed such  
38 a strong bias that the collection of additional observations might result in significance.  
39 The comparisons that approached significance were these: Variance between PCR and  
40 Northern Blots (*comvar2*, 95% CI: -0.281 to 13.340, with a point estimate for a

1 difference in variance of 4.926  $h^2$ ); Variance between PCR and RPA studies (*comvar2*,  
2 95% CI: -0.161 to 8.426, with a point estimate for a difference in variance of 4.065  $h^2$ ).  
3 Such comparisons of non-PCR methods vs PCR-methods were closer to significance  
4 than the non-PCR method comparison of Northern Blots vs RPA studies (*comvar2*,  
5 95% CI: -3.492 to 0.538, estimated difference -0.861  $h^2$ ). Differences in variance based  
6 on shared references produced even weaker signals (but see Figure 10 and Discussion  
7 of Logic for a potential boost of statistical power). All corresponding details are recorded  
8 in the Supplemental Statistical Analysis.

## DISCUSSION

We discuss the more technical aspects of our work in the context of three broader aims of this study: (i) introducing FlyClockbase and connecting it to our current understanding of circadian clocks; (ii) using FlyClockbase to ask new questions about variability in circadian clock time series, possibly illuminating important aspects of clock mechanisms and methods of observation; (iii) improve and simplify how FlyClockbase, and by extension similar biological information resources (*VBIRs*), are constructed, expanded, and maintained.

**Why learn lessons on data?** It would be easy to finalize this study without the third aim. However, it is impossible to address the timely and relevant topic of organizing biological data without the concrete context of a specific resource like FlyClockbase. This discussion is relevant because the increasingly data-centric nature of biological discovery has resulted in calls for improved access to existing data (NIH *et al.* 2012; READ *et al.* 2015; WILKINSON *et al.* 2016), which is easier said than done (GOLDSTON 2008; DOAN *et al.* 2012; GITELMAN 2013; HUANG AND GOTTARDO 2013; MCCALLUM 2013). As physical access to data is increasing, the next frontier is defined by the ability to *efficiently* identify datasets of relevance for a given topic. The diversity of biological questions would make any one single resource for all biologists too cumbersome to use. Instead, this aim could be achieved more efficiently by empowering research communities to construct resources for their own contexts, albeit using a shared interoperable infrastructure. This infrastructure will be perceived as useful to the degree it can provide standards that convincingly address common challenges faced by all biologists aiming to construct *VBIRs* for organizing notoriously uncertain biological data. Developing such standards is an enormous task that requires the integration of lessons from many more studies than any single effort such as this one could produce. Thus, our more modest aim here is to highlight lessons we learned while constructing FlyClockbase, hoping they will be useful as the biological community works towards finding more general solutions (NIH *et al.* 2012; READ *et al.* 2015; WILKINSON *et al.* 2016).

**Why do we need many *VBIRs*?** Efficiently constructing many *VBIRs* like FlyClockbase is necessary for integrating biological information at the scale needed for current research. The need is driven by immense challenges, such as mechanistically understanding and curing cancer (NIH *et al.* 2016; SAMUELS *et al.* 2016), mapping genotypes to phenotypes in personalized medicine and elsewhere (RODEN 2011;

1 MACKAY *et al.* 2012; KIRK *et al.* 2015; ASHLEY 2016), or the evolutionary systems biology  
2 goal of mechanistically predicting realistic fitness landscapes (LOEWE 2016). Irrespective  
3 of whether it is possible to realize these broader visions, any serious attempt will require  
4 the diligent construction of many interoperable *VBIRs* that connect well to state of the  
5 art expertise, and advance biological research in the relevant areas. Thus, we will next  
6 examine FlyClockbase in this respect.

## 9 **FlyClockbase is consistent with current hypotheses**

11 Overall, time series in FlyClockbase are consistent with general published clock  
12 knowledge and with mechanisms currently thought to control the clock. Informative  
13 reviews of the clock that draw on previously published experimental studies are given  
14 elsewhere (HARDIN 2011; ÖZKAYA AND ROSATO 2012). Conclusions from these reviews  
15 are supported by FlyClockbase summary statistics given in Table 4.

17 **CLK and other proteins.** Increasing amounts of VRI protein between about ZT4  
18 and ZT16 repress *clk* transcription, with an especially pronounced effect after ZT14  
19 (CYRAN *et al.* 2003; GLOSSOP *et al.* 2003). Although CLK protein typically functions as a  
20 transcriptional activator for *vri*, the formation of the PER/DBT/CLK/CYC complex  
21 represses the activity of CLK between approximately ZT16 and ZT4 (HARDIN 2011). *vri*  
22 transcription is therefore decreased, causing lower levels of VRI and reducing the  
23 repression of *clk* transcription by VRI. This allows *clk* mRNA to increase and reach a  
24 maximum around dawn (ALLADA *et al.* 1998; ÖZKAYA AND ROSATO 2012). *clk* mRNA  
25 levels also increase due to the action of the transcriptional activator PDP1 protein,  
26 which becomes especially strong around ZT18 (CYRAN *et al.* 2003). Time series in  
27 FlyClockbase reflect this pattern of *clk* mRNA reaching a maximum in the morning  
28 (peak time = 2.79 *DZT* mean  $\pm$  3.16 h *SD*), decreasing throughout the day into the early  
29 night (valley time = 14.33 *DZT* mean  $\pm$  1.67 h *SD*) and then beginning to increase again  
30 in the late night. Although *clk* mRNA does show rhythmic expression, the amount of  
31 CLK protein is not cyclic (Yu *et al.* 2006). Data from FlyClockbase support this constant  
32 expression, as the n=5 peaks and n=9 valleys observed for CLK overlap almost  
33 completely. However, there might not be enough observations to fully settle the issue,  
34 since the variation for both CLK traits ( $\pm$ 3.18h,  $\pm$ 4.30h *SD*) is currently lower than  
35 expected for peaks and valleys that are all drawn from one stable uniform distribution  
36 ( $\pm$ >6.8h; see: Materials and Methods Section, Peak-Valley Section, Randomizing Time  
37 Section).

1           **PER and TIM dynamics.** PER protein, *per* mRNA, TIM protein, and *tim* mRNA  
2 have expression patterns which are generally opposite to that of *clk* mRNA.  
3 Transcription of *per* and *tim* begins mid-morning and is promoted by the transcriptional  
4 activator CLK (ALLADA *et al.* 1998; DARLINGTON *et al.* 1998). FlyClockbase shows the  
5 peak time of *per* mRNA at mean  $DZT = 14.61 \pm 1.58$  h  $SD$  and of *tim* mRNA at mean  
6  $DZT = 14.59 \pm 2.12$  h  $SD$  (using outlier removal method (iii) as in Figure 6; for outlier  
7 removal method (i) see Table 4). This supports data suggesting mRNA levels increase  
8 through the day and into early evening (ALLADA *et al.* 1998; HARDIN 2011). Protein  
9 accumulation reportedly lags behind that of mRNA by about six to eight hours (ZWIEBEL  
10 *et al.* 1991b; HARDIN 2011), though data from FlyClockbase support a shorter delay of  
11 around four to five hours (delay from mean *per* mRNA peak to mean PER peak = 4.03  
12 or 4.84 h, delay from mean *tim* mRNA peak to mean TIM peak = 4.33 or 3.82 h, from  
13 Figure 6 or Table 4, respectively). Between approximately ZT18 and ZT4, the  
14 PER/DBT/CLK/CYC complex represses the activity of CLK (LEE *et al.* 1998; LEE *et al.*  
15 1999; BAE *et al.* 2000; HARDIN 2011). This leads to decreased transcriptional activation  
16 of *per* and *tim*, causing a decrease in *per* and *tim* mRNA levels, which is reflected in  
17 FlyClockbase as a mean *per* mRNA valley at  $DZT = 3.61 \pm 2.32$  h  $SD$  and a mean *tim*  
18 mRNA valley at  $DZT = 5.09 \pm 1.15$  h  $SD$  (Figure 6; difference in variance significant at  
19 5% level). During the day, TIM protein is degraded in response to light (NAIDOO *et al.*  
20 1999; BUSZA *et al.* 2004; OZTURK *et al.* 2011), as indicated in FlyClockbase by an early  
21 mean valley at  $DZT = 5.84 \pm 2.53$  h  $SD$ . PER, which is typically stabilized by TIM, is  
22 then destabilized and more prone to phosphorylation and subsequent degradation  
23 (GEKAKIS *et al.* 1995; KLOSS *et al.* 2001; MERBITZ-ZAHRADNIK AND WOLF 2015). This  
24 finding is consistent with FlyClockbase reports of a late PER mean valley =  $9.41 \pm 1.94$   
25 h  $SD$  (Figure 6). The PER valley is significantly different from the TIM valley ( $P =$   
26  $1.489 \times 10^{-7}$ ) as determined by the Mann-Whitney-U test. Unless specified otherwise,  
27 similar subsequent tests are two-sided and unpaired. To minimize search time for  
28 readers, we added a few non-significant digits to many results in the main text to help  
29 streamline searches for the context of such results in the Supplementary Statistical  
30 Analyses. As the amount of PER decreases, inhibition of CLK-mediated transcription by  
31 the PER/CLK/CYC/DBT complex also decreases, and CLK resumes promoting  
32 transcription of *per* and *tim*.

### 35 **FlyClockbase facilitates hypothesis-driven research**

37 Circadian clocks in *D. melanogaster* are molecular systems of substantial complexity  
38 which have been inspiring generations of researchers to construct numerous  
39 hypotheses about how they work. FlyClockbase can substantially contribute to various  
40 life-stages of a hypothesis.

1           **Starting with a blank slate.** FlyClockbase can set the stage by integrating  
2 existing observations. It is beyond the scope of this paper to discuss the many ways of  
3 extending FlyClockbase beyond its current goals, for example, by providing the  
4 possibility to add time series from mutants. As FlyClockbase accumulates more  
5 observations, its power will increase to help researchers to put new observations into  
6 context by comparing them with already integrated data. Such comparisons can inspire  
7 new hypotheses and help evaluate them quickly. For example, we discuss below the  
8 hypothesis that significant differences in the timing variability of PER and TIM are the  
9 result of mechanistic interactions integral to the operation of this clock. This hypothesis  
10 grew out of our observation that the difference in variability of the peak time in these  
11 proteins was larger than we expected.

12  
13           **Using Attributes to compare timing variability.** Another way of generating  
14 new hypotheses using FlyClockbase is to draw on the many attributes stored for time  
15 series. This structured information classifies time series in FlyClockbase in rich ways:  
16 many groups of column entries are easily combined into hypotheses for identifying  
17 significant differences between different genotypes, strains, observation methods,  
18 environmental conditions and more. Some hypotheses may not be tested easily, as  
19 statistical significance may often require more data. However, FlyClockbase already has  
20 enough data for testing some hypotheses, and insufficient data might inspire new  
21 experiments for testing important ideas. In this way, FlyClockbase can even become a  
22 tool for planning experiments.

23  
24           **Existing hypotheses on timing.** Testing ideas against the data in FlyClockbase  
25 will become increasingly efficient as increasing numbers of experimental results are  
26 integrated into FlyClockbase. This results in a win-win for research productivity. The first  
27 win is clear if sufficient data exists in FlyClockbase to test a hypothesis (saving time). If  
28 the necessary data is not available in FlyClockbase, the second win is highlighting the  
29 potential need for new experiments in areas with limited data. Researchers can then  
30 decide whether to fill this gap with new experiments or prioritize other research. Again,  
31 FlyClockbase can help propose experiments within its scope, which could broaden over  
32 time.

33  
34           **The strength of FlyClockbase.** Whether FlyClockbase will contain enough data  
35 critically depends on (i) the ease of adding new studies in a consistent way, and (ii) the  
36 effort required for checking the integrity of any data fragment. These two core  
37 requirements drive our interests in usability and human error analysis as discussed  
38 elsewhere throughout this study. Hence, work with FlyClockbase highlights how various  
39 subtle yet time-consuming issues of data organization, automation, usability, and error  
40 management that are usually classified as “non-biological” can easily become limiting

1 factors for advancing circadian clock research. Our work on FlyClockbase suggest that  
2 it is more efficient to use the rather systematic approach of automating as much as  
3 reasonable and produce corresponding *VBIRs* in batches. This enables efficiencies of  
4 scale similar to those necessary for completing the human genome project (LANDER *et*  
5 *al.* 2001; VENTER *et al.* 2001). In similar ways, *VBIRs* could help compare data, evaluate  
6 methodologies, extend current knowledge, stimulate new ideas, test hypotheses, and  
7 create new routes of inquiry. We will next illustrate how FlyClockbase improves  
8 scientific productivity for testing hypotheses in its scope, before returning to practical  
9 questions of usability, appropriate data models, and efficient implementation for *VBIRs*.

### 12 **Peak timing hypotheses and more: PER variance exceeds TIM variance**

14 We chose to compare PER protein, TIM protein, *per* mRNA, and *tim* mRNA because  
15 these components are integral to the circadian clock. They interact with many other  
16 clock parts (Figure 1), and null mutants for each gene (*per*<sup>01</sup> and *tim*<sup>01</sup>) lead to  
17 arrhythmicity (KONOPKA AND BENZER 1971; SEHGAL *et al.* 1994). Also, Table 4 shows that  
18 peak and valley observations of these four components were among the most abundant  
19 in FlyClockbase and thus best suited for testing differences for statistical significance.

21 **Comparing averages.** We first compared the mean peak and valley times for  
22 PER and TIM protein and for *per* and *tim* mRNA amounts. Neither the proteins nor the  
23 mRNA had significantly different mean peak times. The mean valley time for *tim* mRNA  
24 is significantly later than for *per* mRNA (Mann-Whitney-U test,  $P = 0.012835$ , see  
25 Supplementary Statistical Analyses for context; two related tests were shy of  
26 significance). It might be reasonable to expect this delay to propagate, such that first the  
27 peaks of mRNAs, then the peaks of proteins, and ultimately also the valleys of proteins  
28 might show a similar pattern of *tim* preceding *per*. However, this pattern is quickly  
29 broken, as the respective pairs of mRNA and protein share essentially mean peak times  
30 for TIM and PER that are statistically indistinguishable. Following the cycle to mean  
31 valley times for proteins even reverses into the opposite pattern: PER mean valley time  
32 is significantly later than TIM mean valley time (see Figure 6;  $P = 1.489 \times 10^{-7}$  as reported  
33 above). Two related tests also indicated significance for all outlier removal approaches  
34 tested (see context in Supplementary Statistical Analyses). These timing patterns defy  
35 the simplistic expectation of merely propagating delays and suggest mechanistic  
36 causes. Demonstrating statistical significance with the help of FlyClockbase suggests  
37 that these patterns might be worth simulating in stochastic models that capture causal  
38 mechanisms and respect the discrete nature of molecules (and resulting variability).

1           **Explaining averages.** We propose that the earlier mean valley time for TIM can  
2 be explained by the rapid degradation of TIM in response to light (BUSZA *et al.* 2004).  
3 Still, TIM's peak time at mean  $DZT$   $18.92 \pm 0.94$  h  $SD$  might deserve a closer look. TIM  
4 peaks in the middle of the dark period and not at its very end as might be expected if  
5 light was solely responsible for degrading TIM.

6           The TIM degradation pathway is well characterized and begins with the activation  
7 of CRY via a light-dependent conformational change (BERNDT *et al.* 2007; OZTURK *et al.*  
8 2011; VAIDYA *et al.* 2013). This change allows CRY to bind TIM in the nucleus (CERIANI  
9 *et al.* 1999; BUSZA *et al.* 2004). The F-box protein JET then ubiquitinates TIM to promote  
10 degradation by the COP9 signalosome (KOH *et al.* 2006; KNOWLES *et al.* 2009).  
11 Following TIM degradation, CRY is also degraded in response to JET-mediated  
12 ubiquitination (PESCHEL *et al.* 2009). In-depth reviews of the TIM degradation pathway  
13 are given elsewhere (HARDIN 2011; PESCHEL AND HELFRICH-FÖRSTER 2011).

14           While light-dependent TIM degradation could explain why TIM reaches its valley  
15 *before* PER, it cannot account for the observation that *tim* mRNA reaches its valley a bit  
16 *after* *per* mRNA. The discrepancy in valley time cannot be caused by differences in  
17 mRNA production, as mean peak times for *per* and *tim* mRNA are not significantly  
18 different. We found this irrespective of the test or outlier removal method. Differences in  
19 variance barely exceeded 5% significance, albeit only if we remove outliers by approach  
20 (iii). See Figure 6 for overview and Supplementary Statistical Analyses for details.  
21 Therefore, we suggest considering differences in *per* and *tim* mRNA degradation. These  
22 degradation patterns could be influenced by CURLED (see below).

23  
24           **Comparing variances.** We also compared the variability of peak and valley  
25 times for the proteins PER and TIM and for the mRNAs *per* and *tim*. Table 6 reports that  
26 peak time is more variable for PER than TIM as indicated by differences in variance that  
27 exceed  $P = 0.05$ , albeit only if we remove outliers using our approach (iii) as described  
28 (CARLING 2000). Table 7 and the Statistical Methods present the necessary nuances. In  
29 short, we are confident that the differences in variance that we observe in most time  
30 series are significant, and not easily attributed to:

- 31 • *Statistical flukes* for the overwhelming majority of PER/TIM time series reported (see  
32 Table 6 and Supplementary Statistical Analyses for details on the robust bootstrap-  
33 based tests performed on the 84% relevant protein peak time series that were not  
34 removed as outliers by Carling's approach, i.e. 59 of 70 combined protein peak  
35 times of PER or TIM); or
- 36 • *Trivial data errors* or inappropriate data handling at our end (see Figure 3 for the  
37 substantial effort in checking FlyClockbase for errors that resulted in *Mod5*, which  
38 was used as starting point for manually re-checking every single time series that  
39 contributed to our observation of PER-TIM differences in variance and resulted in  
40 the correction of all errors in *Mod6* as reported in Table 5);



1 Thus, we reject the explanations above based on our work. In contrast, the potential  
2 explanations below for the origins of outliers are more difficult to reject and cannot be  
3 tested on a routine basis. It also appears unlikely to us that these explanations  
4 contribute more than occasional outliers to typical experimental observations. Therefore  
5  $H_{basic}$ , the default basic null-hypothesis for data from FlyClockbase, recommends above  
6 that outliers are removed as described by CARLING (CARLING 2000). This method is  
7 'approach (iii)' in our Statistical Methods and was chosen after comparing the features  
8 of related approaches for outlier removal as reviewed elsewhere (p. 97 in WILCOX,  
9 2012).

10  
11  
12 **Outliers.** About 16% of all protein peak times (3/33 PER, 8/37 TIM) or 4.3%  
13 (14/325) of all peak valley traits in Table 6 have been identified as outliers by Carlings  
14 method. Including all outliers exhausts the statistical power that FlyClockbase can  
15 currently provide for investigating our differences of variance. As a result, statistical  
16 significance collapses (see Table 7;  $P > 5\%$  in our tests). However, this observation is  
17 unlikely to affect our conclusion that some systematic biological mechanisms are  
18 probably responsible for producing the PER>TIM variance patterns we report. Indeed,  
19 the outliers raise intriguing questions about the sources of their variability. We cannot  
20 currently distinguish the following potential sources of variability that will be discussed  
21 separately.

22 *Genetic background differences.* A substantial minority of flies that are currently  
23 classified as wildtype could have circadian clocks with significant genetic differences.  
24 This hypothesis might not be as unlikely as it may appear when only considering core  
25 clock genes as shown in Figure 1. Carefully listing *all* genes with potential impact on  
26 clock timing quickly reveals much larger mutational targets. Clock models also depend  
27 on specific rates of transcription, translation and degradation. These processes are  
28 governed by huge molecular machines. Unless otherwise more harmful, mutations that  
29 significantly delay or accelerate these machines will affect circadian rhythms.  
30 Frequencies are unknown, but such mutations in the genetic background of a clock  
31 might occur more often than mutations in core clock genes with similar effects on timing.  
32 If true, these clock background mutations could contribute much to the natural genetic  
33 variation in fly sleep patterns, which can be substantial (HARBISON *et al.* 2009a;  
34 HARBISON *et al.* 2009b; HARBISON *et al.* 2013). In addition, selective pressure on  
35 circadian clocks is substantial (BEAVER *et al.* 2002; SHARMA 2003; YERUSHALMI AND  
36 GREEN 2009). It generates observable latitudinal clines of allele frequencies (COSTA *et al.*  
37 1992; ROSATO *et al.* 1996; SAWYER *et al.* 1997; SHARMA 2003; SANDRELLI *et al.* 2007;  
38 HUT *et al.* 2013). Evolutionary importance of individual clock components has been  
39 demonstrated for various clock genes (BEAVER *et al.* 2002), including *tim* (SANDRELLI *et al.*  
40 *et al.* 2007), and *per*, which contains a repetitive region that increases mutation rates for

1 length polymorphisms. The resulting mutational effects are apparently large enough to  
2 maintain a latitudinal cline (COSTA *et al.* 1992; ROSATO *et al.* 1996; SAWYER *et al.* 1997;  
3 KYRIACOU *et al.* 2007; WEEKS *et al.* 2007; KYRIACOU *et al.* 2008). Thus, mechanistic  
4 differences between the circadian clocks of flies from the wild are likely to exist and may  
5 resurface unexpectedly in clock studies.

6 If relevant and substantial, such differences could greatly complicate construction  
7 and parameter estimation in *the* “wildtype *D. melanogaster* circadian clock model”.  
8 While numerous models have contributed towards this aim (see Figure 4), there has not  
9 yet been a *single* model that integrates *all* known data on the clock of a *single well-*  
10 *defined* natural genotype. This ambitious aim becomes much more complicated if  
11 natural variability in clock genes makes time series more variable. Such variability from  
12 natural clock variants could undermine the statistical power of parameter estimation  
13 methods for constructing a *single* clock model for a well-defined genotype.

14 Controlled observations of all data in a single line of fly descent is – in theory –  
15 an easy way out. However, it might be difficult in practice to observe one fly well enough  
16 to match the statistical power of results from many years of research by many labs.  
17 Such focus on a single genotype could also generate a rather unusual clock model if  
18 one of many rare mutants with large effects is present (EYRE-WALKER AND KEIGHTLEY  
19 2007; HARBISON *et al.* 2013). Developing models of such precision could advance  
20 methods for personalized medicine (HODSON 2016). However, most *Drosophila* clock  
21 researchers will probably prefer less precise clock models that usually match more  
22 observations in typical flies. Such general models could be inferred by parameter  
23 estimation methods from sets of time series collected in many genotypes by various  
24 methods but excluding outlier time series using the systematic approaches we  
25 employed (CARLING 2000).

26 *Environmental or developmental differences for measured flies.* Unrecognized  
27 environmental factors that vary among measurements might modulate genetically  
28 identical circadian clocks. If true, experimental protocols for observing circadian rhythms  
29 in *Drosophila* could be improved to increase accuracy of biological replicates. Given that  
30 different authors do not necessarily report the same set of environmental attributes, a  
31 first step towards improving experimental protocols might be to develop a standardized  
32 set of *TimeSeriesAttributes* for FlyClockbase that improve the precision of reports from  
33 ongoing studies. It has been demonstrated that age impacts the clock in flies (UMEZAKI  
34 *et al.* 2012). Environmental factors that affect development in ways that strongly impacts  
35 circadian rhythms could be a potential source of outliers.

36 *Evolution in different lab environments.* Consistent differences in selection can  
37 cause flies to follow different evolutionary trajectories and sometimes the results can be  
38 observed in the lab over a number of years (LEROI *et al.* 1994; SHABALINA *et al.* 1997;  
39 HOFFMANN *et al.* 2001; HAAG-LIAUTARD *et al.* 2007; KEIGHTLEY *et al.* 2009). The flies  
40 generating the data in FlyClockbase might have lived in environments with differences

1 significant enough to trigger some adaptive evolution over a number of years.  
2 FlyClockbase does not yet have enough statistical power to detect significant  
3 differences between strains – if they exist. For example, our initial internal screening  
4 showed no differences between wildtype, color modified strains (*yw* or *w1118*) or other  
5 strains. Currently, FlyClockbase does not have dedicated *TimeSeriesAttributes* for  
6 characterizing the environmental history of flies from the decade leading up to the  
7 measurements. FlyClockbase is ideally positioned for integrating such data, once it  
8 becomes available, and the necessary *TimeSeriesAttributes* have been developed.  
9 However, not all fly clock studies report the LD environment in which their strains  
10 evolved for the previous 250 generations (KANNAN *et al.* 2012). We have no specific  
11 evidence to support the claim that evolution in the lab produced the outliers we  
12 observed. However, some statistically significant evolution of the *D. melanogaster*  
13 circadian clock was observed after applying a relevant selective pressure for 80  
14 generations in the lab (KANNAN *et al.* 2012). Also, note that *per* contains repetitive  
15 nucleotides in its DNA, which result in high mutation rates for repeat polymorphisms  
16 with adaptive significance (ROSATO *et al.* 1996; SAWYER *et al.* 1997).

17 *Human errors.* Setting up, performing, or analyzing clock experiments are  
18 complex tasks, as are reporting experimental procedures, relevant labels, or analyzed  
19 data. Such operations are error-prone (see discussion below) and can make  
20 reproducibility a challenge (BAMMLER *et al.* 2005; FREEDMAN *et al.* 2015a). If all 16%  
21 were the result of combining all human errors before publication, then the overall rate  
22 would be surprisingly close to the 14% human error rate that we measured in Table 5,  
23 and corrected before our final test of the hypothesis that PER variance exceeds TIM  
24 variance. Our ability to detect human errors before publication is very limited. Hence, we  
25 took published plots and their attributes at face value. We excluded time series that had  
26 ambiguities we could not resolve (e.g. from poor plot quality), however, this does not  
27 exclude human errors before publication (see Section on human errors in Supplemental  
28 Material).

29 *Conclusion on outliers.* Thus, we have no reason to assume that errors before  
30 publication could not have produced some of the 16%. It also seems unlikely that none  
31 of the other causes above could have contributed. Distinguishing between the  
32 hypotheses above is currently beyond the statistical power of FlyClockbase. However,  
33 this might be irrelevant for many of the aims for which FlyClockbase was developed for:  
34 a broader understanding of circadian clocks, often intentionally ignoring the details of  
35 many special cases. Thus, even if we had perfect knowledge of all potential sources of  
36 variability above, we might still want to exclude outliers using a systematic approach  
37 such as the one we employed here (CARLING 2000).

1           **Hypotheses on causes for differences in variance.** An obvious explanation for  
2 such differences in protein peak times between PER and TIM could be given by similar  
3 differences in the mRNAs required for producing these proteins. This short-sighted  
4 hypothesis is easily tested using FlyClockbase. It turns out to be demonstrably wrong.  
5 As shown in Table 6 and Figure 6, the increased variance of PER relative to TIM cannot  
6 be attributed to an overall greater variance of *per* mRNA, because the peak time of *per*  
7 mRNA has a significantly lower variance than *tim* mRNA. Therefore, we can rule out  
8 carry-over from similar patterns of variance in mRNA peaks.

9           *Phosphorylation network size.* Here we propose that the increased relative  
10 variance of PER can be explained by the larger number of post- translational  
11 modifications for PER (relative to those observed for TIM). Post-translational  
12 modifications such as phosphorylation play a critical role in in the clock (WEBER *et al.*  
13 2011; RISAU-GUSMAN AND GLEISER 2012). While the exact nature and mechanisms of  
14 these modifications have yet to be fully resolved, there is strong evidence that PER  
15 undergoes more post-translational modifications than TIM.

16           *TIM protein* is phosphorylated by SGG (KO *et al.* 2010), which promotes nuclear  
17 accumulation of PER/TIM complexes (MARTINEK *et al.* 2001), perhaps by allowing  
18 interaction with the nuclear import protein IMPalpha1 (JANG *et al.* 2015). SGG-  
19 dependent TIM phosphorylation has also been implicated in light-induced TIM  
20 degradation, likely in conjunction with CRY and JET (ROTHENFLUH *et al.* 2000a; BAE AND  
21 EDERY 2006; KOH *et al.* 2006; PESCHEL *et al.* 2009). TIM protein therefore undergoes  
22 approximately two to three post-translational modifications.

23           *PER protein*, however, could be subject to ten or more post-translational  
24 modifications. PER is initially phosphorylated by NEMO, which then promotes additional  
25 phosphorylation by DBT (CHIU *et al.* 2011; YU *et al.* 2011). DBT phosphorylates PER  
26 multiple times and influences PER stability, nuclear translocation, and SLIMB-induced  
27 degradation (BAYLIES *et al.* 1992; EDERY *et al.* 1994; ROTHENFLUH *et al.* 2000a;  
28 MARTINEK *et al.* 2001; KO *et al.* 2002; KIM *et al.* 2007; CHIU *et al.* 2008; KIVIMÄE *et al.*  
29 2008; KO *et al.* 2010; CHIU *et al.* 2011; MEZAN *et al.* 2013). PER is also phosphorylated  
30 by CK2A, which promotes nuclear import (LIN *et al.* 2002a; LIN *et al.* 2005; MEISSNER *et al.*  
31 2008). PP1 and PP2A both work against these kinases to dephosphorylate and  
32 stabilize PER (HARMS *et al.* 2004; SATHYANARAYANAN *et al.* 2004; FANG *et al.* 2007; CHIU  
33 *et al.* 2008; GARBE *et al.* 2012).

34           *Mechanistic phosphorylation network stochasticity hypotheses.* Post-translational  
35 modifications could be opportunities for increasing the variability of timing. This is  
36 especially true if a required molecular type only exists in low copy numbers per cell at  
37 some relevant stages of a circadian cycle. As described above, PER protein is at the  
38 center of a large network of potential phosphorylation patterns and proteins, which also  
39 include dephosphorylations. This network of post-translational modifications dwarfs  
40 those observed in TIM protein. A large number of different types of potential

1 modifications will break a large population of PER molecules into much smaller sub-  
2 populations, thereby greatly increasing stochasticity. The heterogeneity of this network  
3 and the relevance of antagonistic forces (dephosphorylation delays degradation)  
4 increase the potential for stochasticity and complicate predictions without detailed  
5 stochastic simulations. In comparison, few rather large subpopulations for TIM probably  
6 result in copy numbers that are high enough to substantially reduce stochasticity.

7 *Previous simulations* have highlighted the possibility of additional variability in the  
8 time required for growing to a defined level, when amplification starts from smaller  
9 amounts. For example, biochemical systems like signal-transduction cascades that  
10 amplify very low molecular counts can easily generate differences in variance for times  
11 to reach a peak (LOEWE *et al.* 2009a; LOEWE *et al.* 2009b; AKMAN *et al.* 2010; EHLERT  
12 AND LOEWE 2014). The inherent stochasticity of circadian clocks might explain the  
13 observed variability via various mechanisms. Potential explanations could include  
14 systematic differences in the distributions of the low molecular counts at the start of the  
15 respective amplifications. If this does not cause all observed differences in variability of  
16 PER or TIM peak timing, differences could be further amplified by the nature of the  
17 different reaction networks that generate the peaks of PER or TIM.

18 *Future simulations.* While beyond the scope of this present study, we think that  
19 such mechanistic phosphorylation network stochasticity hypotheses are worth exploring  
20 in reasonably realistic stochastic simulation models.

21  
22 **Expanding hypotheses on CURLED.** The inversion of variance differences  
23 seen when comparing mRNAs and proteins of PER and RIM suggests that the  
24 variability discussed above is probably governed by the post-translational processes  
25 described above. However, it is less clear how these processes might explain the  
26 significant differences in the variance of valley timing for *per* and *tim* mRNA.

27 Circadian mRNA degradation might be influenced by CURLED (CU), which is  
28 known to affect circadian rhythms. Although *curled* mutants have been known for  
29 decades, CU was only recently identified as dNOCTURNIN (NOC), the *D. melanogaster*  
30 homolog of the mammalian NOCTURNIN (GRÖNKE *et al.* 2009). NOC has been shown  
31 to associate with the CCR4-NOT complex, which promotes deadenylation (and  
32 subsequent degradation) of mRNA (TEMME *et al.* 2010). While NOC is thought to  
33 influence circadian gene control, specific NOC targets have yet to be identified (GODWIN  
34 *et al.* 2013). The gene *noc* produces three transcripts (*nocturnin-RD*, *nocturnin-RC*, and  
35 *nocturnin-RE*), and NOCTURNIN-RD is rhythmically expressed in DN3s (NAGOSHI *et al.*  
36 2010), a subset of dorsal neurons which are part of the circadian circuit and contribute  
37 to evening activity (STOLERU *et al.* 2004). NOCTURNIN-RD knockdown mutants have  
38 abnormal responses to constant light exposure, suggesting that NOCTURNIN may play  
39 a role in circadian light responses (NAGOSHI *et al.* 2010). GREEN *et al.* (GREEN *et al.*  
40 2007) also noted changes in gene expression in response to a high-fat diet for mutant

1 *Noc*<sup>-/-</sup> mice, which could implicate NOC in circadian metabolic control. It would be  
2 premature to postulate an interaction between NOC and *per* or *tim* mRNA. Instead, we  
3 suggest here that NOC and other circadian proteins that influence mRNA degradation  
4 might be a fruitful area of investigation, particularly given the connection between NOC,  
5 light response, and metabolism.

### 8 **Hypothesis: peaks from PCR methods are more variable**

9  
10 The *Attributes* collected for time series in FlyClockbase can be used to compare  
11 different groups of time series for a given clock component based on biological,  
12 methodological, or other factors. These comparisons can suggest sources of variability  
13 that affect future experiments and the interpretation of simulations. To illustrate this  
14 possibility, we compared different measurement methods for observing peaks and  
15 restricted our analysis to *per* mRNA time series, which produced 88 peaks, the largest  
16 number we could extract from FlyClockbase.

17  
18 **Methods background.** Five methods were used to collect at least three  
19 independent time series: (i) Microarrays, (ii) RNA-seq and nascent-seq, (iii) PCR, (iv)  
20 RNase protection assays (RPAs), and (v) Northern Blots. Each method provides  
21 advantages and disadvantages. Historically, Northern Blots were the first of the five  
22 methods to be developed. Although they can provide information about transcript size  
23 (SHARKEY *et al.* 2004), they have low sensitivity (VANDENBROUCKE *et al.* 2001) and can  
24 only be used to analyze one gene at a time (FRYER *et al.* 2002). RPAs were developed  
25 after Northern Blots. They can analyze multiple transcripts (SHARKEY *et al.* 2004) and  
26 can be used to determine absolute RNA levels (VANDENBROUCKE *et al.* 2001). However,  
27 they might have low reproducibility (QU AND BOUTJDIR 2007), and RPA is time-intensive,  
28 typically requiring about four days (STREIT *et al.* 2009). All three of the newer techniques  
29 (PCR, microarrays, and RNA-seq) are high-throughput methods (BUSTIN 2002; SHARKEY  
30 *et al.* 2004; MORTAZAVI *et al.* 2008). PCR, RNA-seq and nascent-seq methods do not  
31 require previous knowledge of specific genes or sequences to be identified (FRYER *et al.*  
32 2002; MORTAZAVI *et al.* 2008). While automation can be difficult for PCR (FRYER *et al.*  
33 2002), microarrays are typically automated. Although RNA-seq and nascent-seq are the  
34 most newly developed methods, technical variability may be a concern, particularly  
35 when using a low number of read counts (BULLARD *et al.* 2010; MCINTYRE *et al.* 2011).

36  
37 **Sensitivity vs reproducibility.** When comparing measurement methods, it is  
38 important to consider both the sensitivity and reproducibility of each method; methods  
39 that have high sensitivity may or may not have high reproducibility. Northern Blots  
40 generally have low sensitivity (GILLILAND *et al.* 1990; WANG AND BROWN 1999; MALINEN *et*

1 *al.* 2003). RPA is more sensitive than Northern Blots, but sensitivity remains a  
2 challenge, especially when using low amounts of mRNA (WANG AND BROWN 1999;  
3 VANDENBROUCKE *et al.* 2001). PCR is considerably more sensitive than either RPA or  
4 Northern Blots (WANG AND BROWN 1999; MALINEN *et al.* 2003). RNA-seq also shows  
5 good sensitivity (MORTAZAVI *et al.* 2008), but RNA-seq sensitivity depends on  
6 normalization techniques (BULLARD *et al.* 2010). There is mixed evidence for microarray  
7 sensitivity. For example, some researchers found that Northern Blots were slightly more  
8 sensitive than microarrays for 14 of 29 assayed genes (TANIGUCHI *et al.* 2001). Six of  
9 the remaining genes, however, were detected by microarrays and not by Northern Blots,  
10 suggesting microarrays were more sensitive to these genes (TANIGUCHI *et al.* 2001).  
11 Older microarrays might only have been able to detect changes reliably if they were at  
12 least two-fold (FRYER *et al.* 2002), but some newer Microarrays have become at least as  
13 sensitive as RNA-seq (WILLENBROCK *et al.* 2009).

14  
15 **Poor reproducibility may be masked by biological variability.** In addition to  
16 differences in sensitivity, measurement methods vary in reproducibility, and the  
17 procedures used in each measurement method point to different potential sources of  
18 variability. For example, RNA-seq requires a small portion of the sample RNA to be  
19 used to construct a library, and PCR used to create this library can introduce variability  
20 through amplification bias (AIRD *et al.* 2011). However, biological variability typically  
21 outweighs methodological variability for RNA-seq (BULLARD *et al.* 2010). A detailed  
22 review of the reproducibility of RNA-seq is given elsewhere (SEQC/MAQC-III  
23 CONSORTIUM 2014). Reports of reproducibility for microarray studies have been mixed.  
24 The 2005 Toxicogenomics Research Consortium raised concerns of variability between  
25 laboratories and between platforms (BAMMLER *et al.* 2005), and cross-platform  
26 reproducibility issues were echoed elsewhere too (CANALES *et al.* 2006). However,  
27 simultaneously a large study by the MAQC Consortium found microarray experiments to  
28 be reproducible both across platforms and across laboratories (SHI *et al.* 2006). We  
29 expected time series measured with RNA-seq and microarrays to show the least  
30 variability, but there was not sufficient data to test this hypothesis.

31  
32 **Experimental causes for PCR variability.** A number of different factors have  
33 been shown to influence the variability of PCR experiments (BUSTIN 2002). For  
34 example, different samples can have different amplification efficiencies (VANGUILDER *et al.*  
35 2008), and, as noted above, the percentage of GC bases can introduce amplification  
36 bias (AIRD *et al.* 2011; ORPANA *et al.* 2012). Others noted that, although PCR is often  
37 thought to be a “gold standard”, extensive tests showed that calibration and selecting  
38 appropriate primers and probes can be challenging (VANGUILDER *et al.* 2008;  
39 SEQC/MAQC-III CONSORTIUM 2014). A low quantity of starting material can also  
40 influence PCR variability (VANDENBROUCKE *et al.* 2001; BUSTIN AND NOLAN 2004).

1  
2 **PCR and Northern Blot accuracy.** Despite these challenges, PCR was  
3 developed more recently than RPA and Northern Blots, and the latter have largely have  
4 largely fallen out of favor, at least partially due to the greater degree of sensitivity  
5 afforded by PCR. Northern Blots are also less accurate than PCR (VANGUILDER *et al.*  
6 2008) and are considered to have low reproducibility (QU AND BOUTJDIR 2007). We  
7 therefore expected to see greater variability in time series measured with RPA and  
8 Northern Blot and less variability in those measured with PCR. However, our analysis  
9 revealed that peak values for time series collected with PCR were significantly more  
10 variable than those from time series measured with RPA or Northern Blot.

11  
12 **Differences between qPCR and RT-PCT?** We subdivided time series measured  
13 with PCR into those measured with real-time PCR (“RT-PCR”) and those not measured  
14 with RT-PCR (“qPCR”). Neither type of PCR was more variable than the other.  
15 Variability did not significantly differ between qPCR and Northern Blot or between qPCR  
16 and RPAs, but careful inspection of the bootstrap distributions produced by *comvar2*  
17 suggests that this could be merely an issue of statistical power (qPCR has fewer  
18 samples than RT-PCR). Accordingly, RT-PCR was significantly more variable than  
19 Northern Blot and RPA. Finding significantly higher variability for RT-PCR was also  
20 surprising, given that real-time PCR was developed more recently than qPCR, and RT-  
21 PCR is considered to be the standard for PCR, as it decreases experimental error by  
22 requiring less data processing than qPCR (VANGUILDER *et al.* 2008).

23  
24 **Analysis of measurement protocol references using FlyClockbase.** We  
25 attempted to explain our observed increase of variability for time series traits observed  
26 with PCR by examining the experimental protocol references cited by each type of  
27 mRNA observation method. It is common for the methods section of studies in  
28 FlyClockbase to reference the experimental protocol of previously published studies.  
29 We hypothesized that differences in these protocol references could explain the  
30 increased variability of time series measured with PCR. The time series identifier  
31 structure, easy access to references, content of respective studies, and the overall  
32 structure of FlyClockbase were instrumental for collecting and organizing information on  
33 experimental protocol references, even though this data was not originally recorded.  
34 The information on method references for *per* mRNA time series is shown in Figure 9.  
35 Table 8 provides overview counts that translate into statistical power when analyzing  
36 each method, either based on counts of time series (bold numbers in Table 8), or based  
37 on counts of studies (non-bold numbers in Table 8).



1           **Shared references are less frequent for PCR studies.** Of the three methods  
2 we analyzed, some methods generally cited more references than others. While all 45  
3 time series using RPA cited at least one method reference, such references were cited  
4 by only about 56% (5/9) of the studies using Northern Blots and about 72% (18/25) of  
5 PCR based time series. Some of the method references were cited once, while others  
6 were cited more frequently. We defined “shared method references” as references cited  
7 by two or more studies which use the same measurement method. Studies using RPA  
8 had 93% (42/45) shared method references. 40% (2/5) of studies that used Northern  
9 Blots had at least one shared method reference, while only 17% (3/18) of PCR studies  
10 had a shared method reference. We hypothesized that decreased variability for time  
11 series measured with RPAs and Northern Blots could be attributed to increased number  
12 of method references and shared method references. However, our statistical tests  
13 found no significant differences between time series with or without method references  
14 or shared method references. We therefore suggest that increased variability in time  
15 series measured with PCR is not caused by a lack of properly documenting or a lack of  
16 using shared protocols but rather stems from actual differences in variability based on  
17 measurement method.

### 20 **Explanation: large fluctuations from PCR stochasticity**

21  
22 Here we provide a mechanistic explanation for the increased variance of *per* mRNA  
23 peak times as measured by PCR (here brief for RT-PCR and qPCR) in comparison to  
24 non-PCR methods (here brief for Northern Blot and RPAs). Briefly, repeated replication  
25 required by PCR starts with substantial stochasticity at very low copy numbers before  
26 reaching its deterministic exponential growth phase. Non-PCR methods for observing  
27 *per* mRNA do not require replication and thus have less potential for variability. Thus,  
28 non-PCR methods cannot distort peak timings as much as PCR can.

29  
30           **Exponential growth causes for PCR variability.** As indicated above, many  
31 different factors can influence PCR variability, including amplification bias, calibration,  
32 primers, probe selection, operator experience, and importantly the overall quantity of  
33 starting material. It is easy to compare at length potential reasons for variability in PCR  
34 and in other methods. We suggest the following simplified analysis that relies on the  
35 fundamentally different behavior of timing errors in exponential growth vs linear growth.  
36 Such errors generate the larger variance of PCR-measured peak timings. Our  
37 explanation requires three basic assumptions:

- 38 (i) Real-world individuals cannot be divided without destroying them.
- 39 (ii) Replication without resource limits inevitably leads to exponential growth.

1 (iii) Timing of later events in an exponentially growing system are easily affected by  
2 an earlier or later start of growth.

3 These assumptions define implicitly a theoretical model of exponential growth that can  
4 explain the increased variability mechanistically. We then present evidence suggesting  
5 the larger variability of PCR peak times should not come as a surprise.

6  
7 **Great sensitivity and poor reproducibility are linked.** The goal of PCR is to  
8 amplify rare nucleic acids by repeatedly replicating in well-defined rounds. During later  
9 stages of growth many molecules are replicated simultaneously. Therefore, any  
10 individual replication event will not significantly impact the overall population, as the  
11 stochasticity of many individuals cancels out increasingly. Ordinary differential  
12 equations work well for such large populations, because their constant violations of  
13 basic assumption (i) are negligible here. The contrast of this precisely predictable  
14 scenario could not be bigger when compared to the very early stages of a PCR reaction  
15 designed to start with low copy numbers for maximal sensitivity. Here basic assumption  
16 (i) severely constrains potentially parallel actions, because single molecules cannot be  
17 broken up without affecting their functionality and are limited in what they can do  
18 simultaneously. This limitation inevitably creates stochastic waiting times that lead to  
19 larger or smaller growth delays that generate the initial timing differences at the root of  
20 cascades of delay that propagate throughout the exponential growth phase due to  
21 assumption (iii).

22 Amplifying single molecules is a hallmark of PCR's exceptional sensitivity. It also  
23 causes PCR's reproducibility problems for the reasons just explained, making it  
24 extremely sensitive to early rare template numbers. Here timing differences in  
25 polymerase access and replication speed can quickly snowball into faster or slower  
26 growth, and thereby, lower or higher amounts inferred for the original molecules  
27 investigated. These problems are highly relevant for all forms of quantitative PCR,  
28 which are designed to operate completely under exponential growth for better  
29 quantitation.

30 Circadian clock cycles with small variations of initial amounts inside of cells,  
31 stochastic timing differences, variations in extracted volume, and other factors can  
32 easily conspire to modify final amounts inferred by PCR (if stopped before resources  
33 become scarce). PCR time series measurements rely on these final amounts to define  
34 the PCR end results used for inferring how much may have been present at the  
35 beginning. For this to work as a quantitative method, PCR has to be stopped in the  
36 middle of exponential growth, implying it will inevitably experience substantial noise  
37 from slight variations in the starting conditions under a broad range of circumstances.

1           **Observations of the theory.** The strong impact of stochastic timing differences  
2 in exponentially growing systems is easily demonstrated in stochastic simulations of a  
3 very simple exponentially growing population (EHLERT AND LOEWE 2014). There the  
4 initial amount is kept constant for all simulations, making timing differences the only  
5 source of stochasticity. The same principles are responsible for translating the  
6 stochasticity of low molecule counts at the input of sensitive signaling cascades into a  
7 reliably transmitted signal, albeit with variation in the waiting time until the signal is  
8 switched on completely (LOEWE *et al.* 2009a; LOEWE *et al.* 2009b). Thus it is not  
9 surprising if experimental measurements show that different researchers with varying  
10 PCR expertise can easily generate 100-fold differences in their inferred initial number of  
11 molecules at the start of a PCR (BUSTIN 2002). Such variability might stem from small  
12 changes introduced to factors that impact the exponential growth essential to PCR in  
13 subtle, but powerful ways; see (BUSTIN 2002; BUSTIN AND NOLAN 2004).

14  
15           *How this applies to amount peak timing observed by PCR.* As shown by growth  
16 mechanism discussed above individual PCR reactions bring individual challenges,  
17 which complicates observations of time series. The main reason is that each time point  
18 measured by PCR will require an independent PCR reaction probably starting with a low  
19 molecular count as obtained from sacrificing an independently running circadian clock.  
20 Thus, observing mRNA clock oscillations by some quantitative PCR method will  
21 inextricably intertwine two processes of variation that inevitably interfere with each  
22 other's observation in these two ways:

- 23           (i)       Oscillations of the clock itself may exhibit substantial stochasticity depending  
24                   on molecular amounts involved (AKMAN *et al.* 2010). This implies that the  
25                   peak itself as measured by PCR may vary, even if PCR were perfectly  
26                   precise.
- 27           (ii)       Low initial molecule counts of the templates that start any quantitative PCR  
28                   reaction cause substantial inherent stochasticity that can substantially affect  
29                   the final amount of PCR products measured. If this happens, researcher are  
30                   likely to infer corresponding deterministic changes in the initial molecular  
31                   counts (BUSTIN 2002).

32  
33           Since every single time series observed by any quantifying PCR is inevitably impacted  
34 by both, a substantial amount of random noise is added to each independently  
35 observed time point. As a result, several time points might falsely appear to be peaks  
36 (or the converse).

37  
38           **Summary.** A low quantity of starting material can influence PCR variability to a  
39 very large degree (VANDENBROUCKE *et al.* 2001; BUSTIN AND NOLAN 2004). Given the  
40 systematically larger potential for measurement noise in PCR methods caused by the  
41 low initial molecule count induced stochasticity, it might even be surprising that PCR is

1 not noisier compared to methods like RPA or Northern Blots that do not require  
2 exponential growth.

### 6 **Model curation for integrating molecular systems biology data**

7  
8 The process of model curation inherently works towards integrating all data that is  
9 relevant and available for a given model of interest. Models may be broadly defined as  
10 systems, parts, processes or questions that are being represented from certain  
11 perspectives to efficiently find particular types of answers deemed to be interesting. We  
12 will next briefly discuss, how this view of model curation can facilitate the integration of  
13 knowledge-fragments from molecular systems biology in order to enable the emergence  
14 of expertise as represented by well-curated systems biology models (e.g. of circadian  
15 clocks) or corresponding relevant sets of real-world observations (e.g. of time series in  
16 FlyClockbase). We will first look at more specific followed by more general levels of  
17 abstraction before discussing other fundamental aspects of model curation.

18  
19 **Related concrete solutions.** At a more specific level, there is no shortage of  
20 standards, formalisms, approaches, tools and other systems for supporting the  
21 application of more abstract categories (like ontologies or models) to concrete problem  
22 areas of interest. Examples include the Systems Biology Markup Language for  
23 constructing simulation models (HUCKA *et al.* 2003; KRAUSE *et al.* 2010), Systems  
24 Biology Graphical Notation for visually representing molecular reaction models (LE  
25 NOVERE *et al.* 2009; MOODIE *et al.* 2011), UMLS and SNOMED for defining and using  
26 medical reference terms with different approaches to synonyms (MAJOR *et al.* 1978;  
27 MERRILL 2009), and specific ontologies for listing existing entities such as 'all genes' in  
28 an area of interest (JONQUET *et al.* 2011; MUSEN *et al.* 2012).

29 At the most specific level are concrete collections of actual models implemented  
30 in one of the formalisms described above. For example, BioBase, which collects and  
31 curates published SBML models (LE NOVERE *et al.* 2006; CHELLIAH *et al.* 2015). This is  
32 closer to the level of FlyClockbase, which collects and curates published time series  
33 within its scope. The substantial number of different formalisms for describing models  
34 can be very confusing. To get a clearer understanding of essential, non-redundant  
35 aspects of model construction it can be useful to consider a more abstract perspective.

36  
37 **Related abstract frameworks.** Several abstract perspectives exist. An ontology  
38 is a list of potentially existing things. A taxonomy is a list of potentially existing species. A  
39 type system is a classification of potentially existing types and how they could be used  
40 to compose new types. Similarly, a model is a specification of potentially existing

1 elements in the world of the model. At the most general level, ontologies and  
2 taxonomies are fundamentally related (ARP *et al.* 2015). The same holds for type  
3 systems, the semantic web, and models in general. All these could be described as  
4 'worlds', as each of these is like a small description of its world. Unless otherwise  
5 specified, they buy into the Closed World Assumption, which implies that nothing else  
6 exists or matters except for the details explicitly specified. At this abstract level, worlds  
7 are all equivalent to systems that encapsulate detailed statements about the conditional  
8 existence of sub-systems, items or events that may be nested or composed from  
9 defined structures, capabilities, and/or other properties. Such abstractions enable the  
10 detection of isomorphisms that can facilitate the transfer of equivalent solutions across  
11 problem domains and hence cut development costs by building on results obtained  
12 elsewhere. For example, different elements or types can be grouped into a set in the  
13 contexts of taxonomy, ontology, type system, or model construction. They each may use  
14 different key words to describe this concept, but its core meaning, i.e. semantics, stays  
15 the same. Each of these worlds comes with its own semantic formalism.

16 It can be challenging to navigate these abstract semantic formalisms for  
17 representing the meaning of statements (VAN RENSSSEN 2005). This resulted in the  
18 paradoxical (non-expert) use of 'semantics' as synonym for 'meaningless' in common  
19 language. A semantic model that is genuinely useful to its writer but incomprehensible to  
20 its reader is not useful to that reader and thus appears 'meaningless, resulting in  
21 semantic irreproducibility (LOEWE 2016). The resulting communication failure is a  
22 substantial problem for modeling, programming, giving names and using names (LOEWE  
23 2016). FlyClockbase has not been spared; we encountered a broad range of semantic  
24 problems caused by naming, from trivial spelling errors (with non-trivial consequences  
25 in database searches) to profound research questions about the nature of certain  
26 molecules (see discussion of CURLED above). Related questions of naming and  
27 nomenclature are of critical importance for biomedical research; correspondingly tools  
28 that efficiently map local nomenclature to standard nomenclature have been identified  
29 as critically important (NIH *et al.* 2012), and would have made development of  
30 FlyClockbase substantially faster (e.g. by helping to manage changes in local names).

31  
32 **Baseline: conceptual unity of reality despite diversity of experimental**  
33 **methods.** Science builds on the physical unity of reality that is observed by different  
34 persons using different methods. This principle is usually so compelling that it is  
35 unconsciously assumed. It allows scientists to confidently assume the same conceptual  
36 unity for aspects of reality that are challenging to study because they may present a  
37 different view when investigated by different approaches. This principle of conceptual  
38 unity is the foundation of model curation. For example, let  $Q$  be the amount of a given  
39 protein type in a single cell specified by place and time. Then  $Q$  itself does not depend  
40 on the various methods subsequently used to measure  $Q$ . If results from different

1 methods of observation contradict each other, we can confidently search for errors. The  
2 confidence is rooted in the conceptual unity of our world, or any cell, or Q.

3  
4 **Contradictory biological information.** While developing FlyCockbase we  
5 repeatedly encountered situations where there were contradictions between different  
6 observations that appeared to be of equally high credibility. On some occasions, even  
7 substantial efforts on our part to check each credible source of confusion we could think  
8 of, did not identify any credible information on what could have gone wrong. Such  
9 situations are profoundly confusing and cost substantial amounts of time. Handling such  
10 difficult situations defines much of the quality of a *VBIR* and its underlying logic  
11 formalism (see also Discussion below and in Supplementary Text).

12 *Debugging time limits.* We found it important to limit the time we used for  
13 attempts to resolve such problems. In this we aimed to be generous yet responsible  
14 with our resources. We also started to search for more formal ways of signaling among  
15 curators when a particular set of problematic time series already had been investigated  
16 sufficiently. The implications of this question for the reproducibility debate are unclear.  
17 Should a seemingly solid experimental study be declared ‘irreproducible’ because an  
18 apparently rushed, ill-conceived experiment failed to reproduce results? Probably not.  
19 Should a seemingly rushed, ill-conceived original study be defended as a valid original  
20 observation, despite the apparent inability of thorough, time-consuming attempts to  
21 reproduce results? Probably neither. However, where is the line between these two  
22 rather extreme scenarios? It is not the task of biological model curators to assess the  
23 credibility of experiments by repeating them. Hence, they need other means of  
24 assessing the quality and relevance of reported observations for the model they curate.  
25 A more differentiated formalized way of communicating various perceived problems  
26 could greatly increase the efficiency of curation work by relieving curators of the implied  
27 unrealistic obligations to always get to the bottom of all inconsistencies or to invent a  
28 reliable taxonomy of resulting errors.

29 *Communicating errors.* Developing a formalism for communicating clearly how to  
30 handle errors efficiently is a complicated problem more closely related to compiler  
31 construction than to biological questions. It requires expertise in both areas. We started  
32 to search for efficient ways of how to best represent outcomes of error analyses for  
33 particular time series. We aimed to formalize such communications with the intent to  
34 enable a compiler to exclude certain types of errors from the results of time series  
35 searches. It became increasingly clear that binary choices like “error: yes/no” were  
36 inappropriately simplistic for many real-world uses of data in biology.

37 *Types of problems with data.* The discussion above demonstrates that a  
38 differentiated approach is necessary for appropriately representing biological data. Not  
39 all trustworthy biological expertise is documented by directly observed data and not all  
40 data that is available has the quality most researchers would ideally aspire to. Statistical

1 inference and logical deduction from experimental observations are also valuable tools  
2 of biological discovery. However, they can only yield conclusions that are as strong as  
3 the observations that support them. It is therefore of utmost importance for reliable and  
4 reproducible research in biology to represent specific experimental observations and  
5 general biological data as they are, including all known limitations and unforeseeable  
6 circumstances, confounding variables, or event. From this perspective, almost all data is  
7 imperfect to some degree. Imperfection in an imperfect world is not a problem, as long  
8 as we are aware of the nature of the imperfections. The current reproducibility crisis  
9 reflects in part the complicated nature of reporting the essence of research results  
10 concisely, yet without ignoring their limitations or omitting potentially undermining details  
11 (BAKER 2016). In our study, we have attempted to be as complete and open as possible,  
12 e.g. by conducting a human error analysis for the raw data of our most important  
13 conclusions and reporting multiple potential variations of our statistics (see  
14 Supplemental Statistical Analysis); this has both substantially increased the length of  
15 this report and the time to complete it. As can be seen in the overall structure of our R-  
16 script that computed our final analysis, such work often requires exploring various  
17 alternative analyses. These all initially appear to be equally valid ways of working  
18 around a given imperfection of the data. Substantial parts of calculating all useful tests  
19 can reasonably be delegated to a compiler for many frequently encountered scenarios –  
20 assuming there is a formal way of communicating the type of data imperfection to the  
21 compiler.

22 *Using imperfect data.* For the reasons above, imperfect biological data is  
23 extremely valuable. Hence, no need to throw out baby hypotheses with imperfect data  
24 bathwater. High-quality model curation considers what can reasonably be learned from  
25 an imperfect dataset by describing as many quantitative aspects as reasonable,  
26 reflecting ideas from the “New Statistics” (CUMMING 2013; CUMMING 2014). Often the  
27 cutting edge of research is defined by situations where not enough high-quality data is  
28 available for a final interpretation. In fact, the value of resources like FlyClockbase is  
29 precisely in their ability to synthesize the limits of what is known and highlight  
30 hypotheses that merit further experimentation. Ignoring imperfect data in this context  
31 would be inappropriate.

32 *Imperfection spelled out.* Hence, FlyClockbase will require better ways of  
33 representing confusing and uncertain real-world data at the current biological cutting  
34 edge of research. Data there can be aggregated, biased, contradictory, diffuse,  
35 exception-prone, false, generated, gap-ridden, hidden, imprecise, jumbled, limited,  
36 missing, modified, noisy, objectionable, problematic, questionable, redundant, scattered,  
37 swapped, tangential, transformed, uncertain, veiled, washed, wobbly, xeroxed, or  
38 otherwise imperfect. A hallmark of good biologists is their ability to intuitively navigate  
39 these difficulties appropriately in their study systems. The rise of big data has led to  
40 substantial experience in how to deal with imperfect data (McCALLUM 2013).

1  
2        *Problem type repository.* Developing *VBIRs* like FlyClockbase efficiently depends  
3 critically on the ability of biological model curators to describe these intuitions in ways  
4 that are formal enough, so that an automated solution can be developed eventually.  
5 Biological experiences with rates of identifying new species in an ecosystem where  
6 many of them exist (GROVE AND STORK 2000) indicate that eventually known species will  
7 be resampled. The same can be expected for the varied number of data problems that  
8 can be observed during the long-term development of *VBIRs*. *VBIRs* would greatly  
9 benefit from a central repository for the logic problems associated with imperfect data.  
10 Such a repository can substantially cut costs of identifying logic problems and would  
11 help in compiler construction, simply by documenting the extent of the problem. It is  
12 difficult, even for experienced biologists, to imagine many of the complications of real-  
13 world data in the absence of actual research interactions with real-world data. It is near  
14 impossible for compiler constructors to do so without also being biologists who work  
15 with real-world data.

16  
17        **The role of logic.** Communicating errors in clear ways fuels our interests in  
18 exploring logic formalisms beyond classic Boolean systems (see also below). Providing  
19 a full formal definition for a chosen logic formalism, alongside all appropriate proofs and  
20 consistency checks is clearly work best done by theoretical computer scientists with the  
21 corresponding formal training. For the reasons discussed above, we do not think that  
22 developing an appropriate logic can be reasonably delegated. As indicated above by the  
23 idea of problem type repository, we found that one of the biggest challenges was the  
24 need to realize the existence of a given problem. Typically, and trivially, biologists find it  
25 easier to specify uncertainties and inconsistencies in real-world observations based on  
26 their experience, while logicians find it easier to identify particular contradictions that  
27 result from an inappropriately defined logic formalism. Our experience suggests that  
28 their combined imagination and expertise will need to be complemented by a slow  
29 careful collaborative review of the detailed problems in a sufficiently complex real-world  
30 research scenario. To facilitate such collaboration, we have described elsewhere the  
31 Flipped Programming Language Design approach (LOEWE 2016), which also inspired  
32 our discussion below of Figure 11.

33        These complex efforts to develop a sufficiently expressive logic for problems with  
34 biological observations contribute towards answering the next question that is in  
35 principle very simple.

36  
37        **Simple question: how many molecules of a given type exist at a given time**  
38 **in a given cell?** Modern biology has invested much effort into developing many diverse  
39 approaches for investigating intracellular quantities of interest. Such quantities often  
40 relate to the simple question of amounts in one of the myriads of forms in which it is



1 posed in biology today. Generating well-defined, credible answers that properly quantify  
2 all relevant uncertainties would go a long way towards providing the data required for  
3 algorithms aiming to solve the inverse problem (see Models Section). The answers to  
4 this problem quantify the uncertainty of parameters, which are needed for simulating  
5 models of molecular systems in cells. Such simulations can be seen as devices for  
6 extending biologists' thinking capabilities and enable investigating new areas of biology  
7 (see comments on evolutionary systems biology (LOEWE 2016)). Unfortunately, it is  
8 extremely challenging to answer the conceptually simple question above for real  
9 molecules in real cells with reasonable quantifications of uncertainty.

10 *Observations in FlyClockbase.* Many of the practical challenges of determining  
11 such amounts of molecules have been constant companions of our work with  
12 FlyClockbase. For example, consider the differences in techniques used to measure  
13 amounts of mRNAs or proteins produced by genes such as *per* or *tim*, (see Figure 10 or  
14 *TimeSeries Attribute Table* in FlyClockbase for details on methods). While each  
15 technique is limited in unique ways, a given quantity of interest can usually be  
16 measured in several ways that vary in trade-offs between precision, cost, and other  
17 method parameters. As a result, interesting quantities that can be measured in cells  
18 have often been measured by dozens of methods, each of which may be implemented  
19 by different independent experimental protocols and belong to one of several applicable  
20 broader methodological approaches. Each of these may provide different answers to  
21 the following practical questions that are highly relevant for model curation. Are amounts  
22 of molecules in a single relevant core clock cell of *D. melanogaster* ...

- 23 • ... *absolute counts* (our preferred ideal) or *relative* (usually reported)?
- 24 • ... from a *single cell* (may be used to infer molecular noise) or from *averaging* over a  
25 population of cells (or some other aggregation difficult to disentangle)?
- 26 • ... *complete and direct raw observations* (enabling independent statistical analyses)  
27 or *summaries* of "typical plots" of "the most relevant data" (that can introduce  
28 uncontrollable ascertainment biases as observed in other areas, e.g. (AMOS *et al.*  
29 2003; CLARK *et al.* 2005; FOLL *et al.* 2008; LACHANCE AND TISHKOFF 2013; MINIKEL *et*  
30 *al.* 2014))?
- 31 • ... *appropriately annotated* with all key details for maximizing long-term use in  
32 diverse meta-analyses (rare; authors have little guidance on what to report) or  
33 *missing annotations* for key details known to exist even if unreported (e.g. fly age,  
34 sex), or not reasonably knowable (e.g. fly clocks were disturbed by unexpected and  
35 unreported drastic changes in temperature)?
- 36 • ... *reasonable approximations of reliable results* (as would be expected from diligent  
37 analyses of larger and higher-quality data sets if reproduced in the same system or  
38 *irreproducible* (recent observations may give reason to pause (IOANNIDIS *et al.*  
39 2009a; SALANTI AND IOANNIDIS 2009; MOBLEY *et al.* 2013; FREEDMAN *et al.* 2015a;  
40 FREEDMAN *et al.* 2015b; HALSEY *et al.* 2015))?

1 The unity of reality implies that similar representational approaches can contribute  
2 towards rigorously assessing reproducibility and towards curating heterogeneous and  
3 imperfect datasets into an internally consistent *VBIR*: both efforts would benefit from  
4 explicitly stating all uncertainties and other problems associated with a given set of  
5 observations.

6  
7 **Curation efforts for circadian clock research.** FlyClockbase is unique in its  
8 scope, datasets covered and many other aspects – as far as we can tell. In particular,  
9 we are not aware of other circadian clock time series resources or meta-analyses that  
10 bring similar numbers of replicate time-series or studies together in order to answer  
11 questions about the differences in variances of peak times between different  
12 components of the core circadian clock of *D. melanogaster*. However, FlyClockbase is  
13 not the first biological information resource sharing observations about circadian  
14 oscillations in gene expression. We will next discuss some examples of related efforts; a  
15 review of additional bioinformatics resources relevant for clock research can be found  
16 elsewhere (LOPES *et al.* 2013; LI *et al.* 2017).

- 17 ● *CircaDB* ( <http://circadb.hogeneschlab.org> ) is a publicly accessible web database  
18 storing time series observations that record how gene expression changes in various  
19 mammalian tissues throughout the day (PIZARRO *et al.* 2013). It has been used for  
20 documenting the large extent to which gene expression in mice follows circadian  
21 patterns – with interesting implications for drugs that target the products of  
22 rhythmically expressed genes and that might benefit from timed dosage (ZHANG *et*  
23 *al.* 2014a). While many genes in the mouse clock are homologous to fly clock genes,  
24 there were no observations of non-mammalian gene oscillations in *CircaDB* at the  
25 end of 2016. A strength of *CircaDB* is the availability of detailed tissue specific data  
26 from mice.
- 27 ● *CGDB*, the Circadian Gene DataBase ( <http://cgdb.biocuckoo.org> ) version 1.0 (as  
28 of 2017-01-14) contains information (i) on 1,382 instances where gene expression  
29 followed circadian rhythms as observed by techniques like RT-PCR, Northern Blots  
30 or *in situ* hybridization; (ii) on 26,582 observations of gene expression found in  
31 transcriptome profiling studies to follow circadian rhythms; and (iii) on 44,836  
32 potentially oscillating genes as identified in a search for orthologs of oscillating  
33 genes (LI *et al.* 2017). A strength of *CGDB* is its broad coverage of 148 different  
34 animals, plants, or fungi. Of the 27,964 genes with experimental evidence of  
35 oscillatory gene expression, 3166 have been observed in *D. melanogaster*. Of these,  
36 14 observations cover all isoforms of *per* and *tim*, but only 5 of these were recorded  
37 in LD. The peak and valley times reported in *CGDB* do not contradict those reported  
38 by us here; however, the reported sample size does not have the statistical power to  
39 suggest new hypotheses on potential clock mechanisms.

- 1 ● *Deep (machine) learning* approaches were investigated for their capacity to predict  
2 time and to distinguish rhythmic from arrhythmic time series (AGOSTINELLI *et al.*  
3 2016). To this end BioCycle<sub>Real</sub> was curated from 36 gene expression datasets,  
4 including 32 from CircadiOmics ( <http://circadiomics.igb.uci.edu/> ) (PATEL *et al.*  
5 2012). Except for one from the plant *Arabidopsis thaliana*, all datasets came from  
6 mice (AGOSTINELLI *et al.* 2016).
- 7 ● SCNseq ( <http://wgpembroke.com/shiny/SCNseq/> ) provides access to temporal  
8 transcriptomics of circadian clock controlling cells in the suprachiasmatic nucleus of  
9 the mouse brain at unprecedented precision (PEMBROKE *et al.* 2015).
- 10 ● *Bioclock* ( <http://www3.nd.edu/~bioclock/> ) is a repository of circadian transcriptional  
11 profiling data from *Anopheles gambiae* and *Aedes aegypti*, mosquitoes acting as  
12 vectors for malaria and yellow fever, respectively (RUND *et al.* 2011; RUND *et al.*  
13 2013; LEMING *et al.* 2014).
- 14 ● *BioDare* ( <http://biodare.ed.ac.uk/> ; <http://millar.bio.ed.ac.uk/data.htm> ) is an online  
15 service for data-sharing and analysis of circadian time series observations. It's 10  
16 datasets from *A. thaliana* were used for comparing period estimation methods and  
17 other clock research (ZIELINSKI *et al.* 2014).
- 18 ● dbCRY ( <http://www.dbcryptochrome.org/> ) facilitates comparative genomics of  
19 cryptochromes, the light-sensing proteins in clocks (KIM *et al.* 2014); see Figure 1.
- 20 ● *Diurnal 2.0* ( <http://diurnal.mocklerlab.org/> ) provides access to observations of  
21 circadian genome-wide gene expression patterns observed in several common  
22 model plants (MOCKLER *et al.* 2007).
- 23 ● *EUCLIS* ( <http://www.bioinfo.mpg.de/euclis/> ) is the 'EU Clock Information System'.  
24 It adapted an advanced database architecture from another systems biology project  
25 for circadian clock researchers in order to combine modules for experimental data,  
26 clock models, and a related digital library (BATISTA *et al.* 2007; LOPES *et al.* 2013).

27  
28 *Individual meta-analyses* occasionally integrate different datasets in an effort to  
29 increase the statistical power and reliability of conclusions. For example, combining and  
30 curating data from five independent microarray studies in *D. melanogaster* confirmed  
31 the rhythmical expression of 81 transcripts while also identifying 133 new cycling  
32 transcripts (KEEGAN *et al.* 2007). To arrive at their conclusions, KEEGAN *et al.* had to  
33 obtain data directly from the authors of the microarray studies they analyzed as not all  
34 necessary data was available online (CLARIDGE-CHANG *et al.* 2001; McDONALD AND  
35 ROSBASH 2001; CERIANI *et al.* 2002; LIN *et al.* 2002b; UEDA *et al.* 2002). In turn, the  
36 same happened with their results: "All data used to produce this report are available  
37 upon request. Files that contain the individually formatted results from each of the

1 original reports were too numerous and large to be included with this manuscript ...”  
2 (KEEGAN *et al.* 2007). Some (non-meta-analysis) studies that generate substantial  
3 amounts of new data put in the substantial additional work necessary for making  
4 material available online (e.g. see <http://biorhythm.rockefeller.edu/> (CLARIDGE-CHANG *et al.* 2001)). Merely *storing* complex data in one or more file archives online is usually  
5 easy, but organizing and documenting complex datasets for use by independent  
6 researchers is not. This requires semantic reproducibility, which can quickly become  
7 prohibitively complex (LOEWE 2016) if no existing conventions are shared with users.  
8 Projects above have used database technology and/or web interfaces as shared  
9 conventions facilitating communication; as argued elsewhere in our study, this is neither  
10 ideal for all biologists nor for all work in biology. These problems are less acute for  
11 studies that can fall back on using public repositories with an appropriate data format.  
12 For example, a functional analysis study of fly genes expressed in response to the light-  
13 induced resetting of the circadian clock (ADEWOYE *et al.* 2015) stored most data at the  
14 NCBI-maintained Gene Expression Omnibus database (  
15 <https://www.ncbi.nlm.nih.gov/geo/query/acc.cgi?acc=GSE39578> ); NCBI GEO offers  
16 semantics particularly well suited for describing typical microarray datasets (BARRETT *et al.* 2005; BARRETT *et al.* 2011; BARRETT *et al.* 2013; CLOUGH AND BARRETT 2016).

19 *Generic model organism repositories.* Resources like the individual-study  
20 repositories above, meta-analyses, and circadian research specific repositories are  
21 complemented by generic model organism resources such as FlyAtlas  
22 ( <http://flyatlas.org> ) for gene expression information (CHINTAPALLI *et al.* 2007;  
23 CHINTAPALLI *et al.* 2013a; CHINTAPALLI *et al.* 2013b; ROBINSON *et al.* 2013) and FlyBase ( <http://flybase.org/> ) for genomic and other information (ASHBURNER AND DRYSDALE 1994;  
24 ST PIERRE AND MCQUILTON 2009; GRAMATES *et al.* 2017).

26 *Why curate circadian data?* Without detracting from the important achievements  
27 that continue to be enabled by the resources specified above, some points are worth  
28 noting for further discussion. Scarcity is first. We attempted to be as inclusive as  
29 possible and added resources far beyond the focus of our study on core clock genes in  
30 flies; recent reviews (LOPES *et al.* 2013; LI *et al.* 2017) do not list much more. Yet  
31 rhythmic gene expression is pivotal for fitness, health and more. This is underlined by  
32 estimates of 10% or 43% of the expressed genome under rhythmic control (BOYLE *et al.*  
33 2017) or of all protein coding genes showing circadian expression patterns somewhere  
34 in the body (ZHANG *et al.* 2014a), respectively. Given this importance of circadian  
35 biology, it seems surprising that not more circadian clock related repositories exist. One  
36 potential reason is that the tools for managing data are inadequate and discourage  
37 many biologists from getting involved. Secondly, the existing resources are scattered,  
38 very heterogeneous with respect to their data structures resulting in poor  
39 interoperability, and they are haphazardly reorganized (e.g. web addresses move,  
40 internal structures are modified).

1           *Challenges.* Circadian clock researchers have repeatedly stated over the years  
2 that the arrival of new data due to experimental advances creates new challenges for  
3 data management and data processing (ZIELINSKI *et al.* 2014). These could be  
4 addressed by the development of a new infrastructure that standardizes data and  
5 software to reduce re-implementation efforts, improve documentation, and increase  
6 collaboration by sharing data (BATISTA *et al.* 2007; ZIELINSKI *et al.* 2014). This need for  
7 improved and simplified infrastructure exists for systems biology in general (CASSMAN  
8 2005) and similar ideas have been echoed in the debate about reproducibility (BUCK  
9 2015). The underlying issues have not yet been solved on a broader scale (NIH *et al.*  
10 2012; NIH 2015; NIH 2016; WILKINSON *et al.* 2016). A recent review of additional  
11 bioinformatics resources pointed out that tools cannot replace researchers, because it is  
12 “often necessary to conduct an evaluation of the results of a data mining effort to  
13 determine the degree of reliability” (LOPES *et al.* 2013). Indeed, experiences at UniProt  
14 show that “expert curation is by far the most reliable method to report gold-standard  
15 information and provide an up-to-date knowledgebase containing experimental  
16 information” (THE UNIPROT CONSORTIUM 2017). We argue that much of the low-level  
17 work of ensuring reproducibility and adherence to formal standards could be handled  
18 reliably by a compiler that transparently executes well-defined recurring tasks (see  
19 Discussion below and in Supplemental Material).

20  
21           **Perspectives on biological model curation.** Circadian clocks control rhythmic  
22 gene expression for a substantial and important fraction of the genome, approximating  
23 half of all genes in mice (ZHANG *et al.* 2014a). It is thus difficult to isolate clocks from the  
24 rest of the organism they govern. An overall assessment of the impact of circadian  
25 clocks might thus require simulating whole cells or even whole organisms. This  
26 perspective raises several questions.

27           *Will this scale to real cells?* The challenges of reproducibility for systems that are  
28 comparatively small are multiplied on much more complex systems, such as the  
29 molecular systems biology simulations of whole cells that have started recently at a  
30 larger scale (KARR *et al.* 2012; KARR *et al.* 2013; LEE *et al.* 2013; PURCELL *et al.* 2013;  
31 SANGHVI *et al.* 2013; KARR *et al.* 2014; KARR *et al.* 2015a; KARR *et al.* 2015b). The  
32 ultimate aim of such studies is to understand in detail, how a real cell work and evolves  
33 over time (LYNCH *et al.* 2014). However, the question is, whether our tools will be able to  
34 scale in such a way that errors can be kept down and our toolchain remains reliable.  
35 Hence, outstanding reproducibility of smaller models and datasets are a prerequisite for  
36 any further integration. We have chosen to focus on the simplest possible  
37 implementations when developing *VBIRs* to enable durability.

1           *Will tool development overwhelm biological goals?* The essential requirement of  
2 tools that handle biological data more accurately and with more ease could continue to  
3 bind disproportional amount of resources through a lack of coordination (see eg.  
4 (CASSMAN 2005)). Usually only one excellent tool for a given task is needed, not several  
5 that are usually good enough but break down in some special cases, which then require  
6 completely new implementations. It is encouraging that the accuracy of computational  
7 tools in some areas converges towards that of high-quality experiments (e.g.  
8 (LEJAEGHERE *et al.* 2016)); likewise, the development of more precise higher-level  
9 abstractions simplifies much of the lower-level programming (e.g. (ARP *et al.* 2015)).  
10 However, the need for new and more precise tools is vast, and only few biologists can  
11 program well enough to contribute. Thus, support from computer scientists and  
12 professional programmers will certainly be needed. However, without the extraordinarily  
13 close collaboration described here it will be extraordinarily difficult to develop tools that  
14 are efficient enough in real biological research in order to drive adoption. Only then will  
15 tool development start to contribute to the overall biological goals. In our analysis, the  
16 development of a VBIR compiler is a particularly efficient way of tool development (see  
17 Discussion below). The efficiencies from compiler development might help with raising  
18 the funding for VBIRs on a more permanent footing (EMBER *et al.* 2013).  
19 Simultaneously, experimental methods, their limits, and associated errors and biases  
20 will require more rigorous analyses in order to contribute towards a more accurate  
21 description of the precision associated with the actual observations (e.g. for sequencing  
22 errors see (ROBERTS *et al.* 2013; ROBERT AND WATSON 2015), for n-fold gene expression  
23 see (CANALES *et al.* 2006; CANALES 2016), for PCR see (BUSTIN 2002; BUSTIN AND NOLAN  
24 2004; VANGUILDER *et al.* 2008), for tests of a parameter estimation method, e.g. see  
25 (DAIGLE *et al.* 2012); many more analyses for other methods are needed).

26  
27           *Will biology try to advance too fast for its own good?* The 1970's saw the rise of  
28 systems theory in ecology, albeit arguably too early (WOLKENHAUER 2001). Now systems  
29 biology has in principle a computational method at its disposal for every single step  
30 along the causality chain from genotype and environment to phenotype and fitness  
31 (LOEWE 2009; LOEWE 2012; LOEWE 2016). However, what does not exist at the moment  
32 is a rigorous and integrated problem management for the full causality chain. Clearly,  
33 more uncertain output at more causal calculations will combine with additional  
34 uncertainties at more consequential calculations. If this accumulation of uncertainties  
35 occurs on the long causal chain from genotype to phenotype, then it is presently not  
36 clear, which signal-to-noise ratio is to be expected. This question can only be resolved  
37 by an integral management of uncertainties similar to what we propose. Advancing  
38 simulations of whole cells or even organism too fast without allowing for appropriate  
39 precision to grow in method development and curation might cause rigorous scientists

1 to lose patience, throw out the baby with the bathwater, and thereby cause unnecessary  
2 setbacks.

3 *Balance.* It is neither possible nor necessary to manage either of the extremes  
4 above beyond being aware of them, to avoid falling into either trap. The dynamic nature  
5 of biological research will then run its course. However, any foreseeable scenario will  
6 have a very large need for biological model curation, which will require many well-  
7 equipped biologists, as high-quality model curation will always remain a human task.  
8 Similarly, in any credible scenario, biological model curators will greatly benefit from  
9 support by a well-equipped VBIRs compiler.

10

11

12

## Towards a compiler for advancing FlyClockbase and biology

Working with FlyClockbase has given us ample opportunities to observe first-hand many diverse problems that frequently complicate an otherwise efficient use of computers or formal simulation methods for advancing biology. Below we highlight a few key observations suggesting a greatly increased efficiency for integrating computers in the workflow of FlyClockbase and similar *VBIRs* could be enabled by the construction of a corresponding *VBIR* compiler. This requires paying the moderately increased cost of constructing such a compiler only once. In return, the whole biological community could substantially cut the excessive costs of manually constructing or maintaining *VBIRs*. The substantial costs of *VBIRs* construction conflict with the growing need of compiling thousands of *VBIRs* that integrate in computable form the biological expertise necessary for engaging the grand challenges of our time. Leveraging abstractions developed in computer science for cutting through the complexities of data management with the help of an appropriately designed compiler could greatly reduce the costs of integrating biological expertise in order to address grand challenges more efficiently.

**History.** Similar thoughts about better computing for biological discovery have been recurring since the dawn of computing (TURING 1936), fueling many discussions of chances and challenges in diverse areas and applications, including the following examples: harness the precision of logic for biological discovery (WOODGER *et al.* 1937), simulate genetic systems (CROSBY 1973), open science (BARTLING AND FRIESIKE 2014), improve reproducibility (IOANNIDIS 2005b; DONOHO 2009; HUANG AND GOTTARDO 2013; LOEWE AND KEEL 2014; STODDEN *et al.* 2014; FREEDMAN *et al.* 2015a; JAMES *et al.* 2015; STODDEN 2015; BARBA 2016; LOEWE 2016; LOEWE *et al.* 2016), share data (WILKINSON *et al.* 2016), and do so efficiently at larger scales (NIH *et al.* 2012; NIH 2015; NIH 2016). To contribute to this debate that also affects FlyClockbase, the next sections distill the essence of selected key challenges we observed. We connect our observations to relevant research in other disciplines to reduce rediscovery where possible.

**Unusual approaches to constructing an unusual compiler.** We will conclude that many or most of the problems below could be solved efficiently by carefully constructing a corresponding compiler. Its specialty is to facilitate the implementation of best-practice solutions for constructing *VBIRs* and addressing the many challenges which biologists regularly face when they aim to use computers for advancing their research. Our approach goes far beyond superficial reassignments of responsibility; rather it proposes that broad classes of problems in biology could benefit from computational solutions if the latter are designed with enough time and care for those



1 abstractions that matter for real-world biology. Figure 11 illustrates key aspects of the  
2 development process we used. It represents a very unique informal blend of two  
3 opposite extremes in software development. The extreme known as ‘agile methods’  
4 advocates for quick iterations that implement tangible improvements. Its successes  
5 have made it popular, but it is not without a dark side that can stifle the development of  
6 innovations and strategies needed for solving more complex problems (JANES AND SUCCI  
7 2012; ANNOSI *et al.* 2016). The other extreme approach to software development is  
8 known as the ‘water-fall method’. It emphasizes thorough planning of various stages,  
9 and clearly separates developing a design from implementing it. As captured in Figure  
10 11, data integration in FlyClockbase followed faster (internal) release cycles. Questions  
11 of fundamental importance with implications for formal or theoretical aspects of compiler  
12 design followed a much slower timeline. This allows us to focus our implementation  
13 resources on the most promising and efficient formalisms, and avoid the need for  
14 implementing potential solutions that appear attractive for some time, but are replaced  
15 by the need for further improvements. In such situations, overall speed of compiler  
16 development probably benefits from manual VBIR curation, since this allows the  
17 compiler design the time it needs to mature. Working in a research setting, as we did  
18 with FlyClockbase, creates additional challenges, simply from the unpredictability of  
19 research. Classifying potential bugs in compiler construction can be seen as a problem  
20 similar to the development of the taxonomy of beetles: both exist in exceedingly larger  
21 numbers, and continued random sampling eventually leads to re-encountering similar  
22 bugs. Constructing a compiler that can deal with biology’s uncertainty and complexity in  
23 a stable and reliable way requires a very extensive sampling of these potential bugs (i.e.  
24 logical program inconsistencies). We have developed the Flipped Programming  
25 Language Design Approach in order to address this problem using repeated rounds of  
26 rigorous review of proposed compiler designs from multiple usability and domain  
27 experts (LOEWE 2016). Our work on FlyClockbase benefitted from this approach and  
28 also contributed to its development. It illustrated for us, how developing good  
29 abstractions can take a very long time, and how much finding them worth the effort.

30  
31  
32 Place FIGURE 11 about here.

33  
34 **Cost of *not* constructing a VBIR compiler.** Research on circadian clocks in  
35 flies can be used to illustrate some of the cost to biology if no VBIR compiler is  
36 available. As explained above, time series observations are extremely valuable for  
37 inferring mechanistic models of clocks in flies. Yet, in the last 25 years, the vast majority  
38 of models of the core *D. melanogaster* circadian clock have been based on *abstract*  
39 clock features, such as the response to light, the period and presence of oscillations.  
40 We conducted an extensive search for such models, and only three of the 66 models

1 identified used specific experimental time series to inform parameters (Figure 4). Even if  
2 combined, these models only used a small fraction of all studies with time series data  
3 they could have used (Figure 5). Specifically, parameters study A (FATHALLAH-SHAYKH *et al.*  
4 *2009*), B (LEISE AND MOIN *2007*), and C (KUCZENSKI *et al.* *2007*) were based on time  
5 series from, respectively, one study (KADENER *et al.* *2007*), three studies (LEE *et al.*  
6 *1998*; BAE *et al.* *2000*; SHAFER *et al.* *2002*), and 11 studies (HARDIN *et al.* *1992*; ZENG *et al.*  
7 *1994*; SEHGAL *et al.* *1995*; SO AND ROSBASH *1997*; BAE *et al.* *1998*; LEE *et al.* *1998*;  
8 BLAU *1999*; BAE *et al.* *2000*; KIM *et al.* *2002*; CYRAN *et al.* *2003*; GLOSSOP *et al.* *2003*).

9 The sparse use of directly observed experimental evidence such as time series is  
10 understandable in light of the many challenges that complicate the integration of messy  
11 biological real-world observations into the abstract mathematical models that are often  
12 extremely simplified to facilitate their mathematical analysis. In addition to such  
13 conceptual problems, deceptively simple problems such as the storage and  
14 organization of very heterogeneous, imprecise, noisy and contradictory experimental  
15 datasets can easily create insurmountable practical challenges for directly using  
16 experimental time series data to inform parameters in models.

17 FlyClockbase substantially lowers this barrier by providing a nucleus for  
18 collecting, organizing, and curating relevant time series and their many potentially  
19 informative *Attributes*. If increasing numbers of experimental time series are deposited  
20 in FlyClockbase and its organizational structures keep pace with this growth, then future  
21 modeling studies could be structured in a way that enables the automated improvement  
22 of some types of models in response to the submission of new data. Such data handling  
23 capabilities are likely to enable the investigation of new biological aspects of circadian  
24 clocks that are beyond practical limits of the complexity manageable by current tools. If  
25 a reasonably well-working VBIRs compiler had been available for a long time, then the  
26 substantially lower barrier to the development of a resource like FlyClockbase would  
27 most likely have resulted in a more comprehensive use of hard won experimental data  
28 in theoretical models. Even where datasets have been compiled and published under  
29 open access, an unstructured way of storing them can very quickly make it prohibitively  
30 complicated to keep them up-to-date on the longer-term (e.g. (WHITE *et al.* *2013*; SUPP  
31 *et al.* *2015a*)). Such problems also pose challenges for citizen science projects (e.g.  
32 (LOEWE *2007*; SUPP *et al.* *2015b*)). Even if computational results are fully structured from  
33 one perspective, the lack of appropriate data structures for analysis from another  
34 perspective, can create prohibitive barriers for some research (LOEWE *2002*).

35  
36 **Counter intuitive challenges and other work.** However, before such a vision of  
37 biological research can move closer to reality, a number of counterintuitive challenges  
38 will need to be addressed. Since an appropriate discussion is beyond the scope of this  
39 paper and more details are given in the Supplemental Material, we will merely touch on  
40 the tips of several icebergs below by discussing a few illustrative examples. Despite

1 great and sustained progress in logic research, much remains to be done to improve the  
2 expressive power of known systems of logic (SMITH 2008).

3 *More biological precision requires handling more imprecision more precisely.* The  
4 ultimate aim of FlyClockbase is to improve the precision of circadian clock models by  
5 making all relevant data easily available for parameter estimation tool. Accomplishing  
6 this goal goes far beyond compiling the data. It requires entirely new approaches for  
7 dealing with uncertainty, imprecision, contradictions, gaps, and numerous exceptions  
8 created by the astonishing diversity of methods used to observe biological systems.  
9 These challenges belong to the many predictably unpredictable surprises that will be  
10 encountered by any efforts for constructing *VBIRs* of substantial complexity, such as  
11 FlyClockbase. Accurately describing biological observations made in this often-  
12 confusing context is a substantial challenge we encountered while developing  
13 FlyClockbase. We found that it is not enough to ‘describe the issues in words’; this  
14 would merely create additional free-text repositories with unstructured information,  
15 maybe with a bit more focus than a corresponding collection of PDF-files with the full  
16 text of the study. Such free texts could not have enabled us to search efficiently for time  
17 series. We found it extraordinarily useful to have key information in a more structured  
18 form, e.g., to compare mRNA measurement methods (see above). However, such  
19 structure must not come at the expense of the ability to efficiently represent newly  
20 encountered imprecision or data. We found that a working biologist with sufficient  
21 domain expertise is the best expert for choosing how to handle newly encountered  
22 information: ignore, describe in unstructured comments, or create corresponding  
23 *Columns* in an *AttributeTable*. Without a substantially sophisticated and extendable  
24 system for dealing with imprecisions, very little information will become available for  
25 automated processing in more coordinated ways. Ignoring such problems may be  
26 reasonable in some cases, but eventually, the inability to handle such imprecisions  
27 correctly will artificially narrow distributions and create illusory precision that wrongly  
28 rejects simulations as unrealistic and can unnecessarily complicate parameter  
29 searches. Conversely, allowing for too broad a margin of error can easily result in a  
30 misleading model caused by biologically unrealistic parameters. Thus, appropriately  
31 managing errors and uncertainties in observed time series is one important key to  
32 improving mechanistic models of circadian clocks informed by the real-world time series  
33 in FlyClockbase.

34 *Logic in gene regulatory networks.* The classical Boolean logic of compilers and  
35 gene regulatory networks share an unexpected connection if the input, output, and  
36 every step in between are well approximated by just two states (KARLEBACH AND SHAMIR  
37 2008). Thus, compilers could provide unexpected help for modeling gene regulatory  
38 networks. If provided with the right details, compilers could also automatically detect  
39 situations where gene regulation becomes stochastic due to low molecule counts in a  
40 cell (MACNEIL AND WALHOUT 2011). The help of compilers that automatically analyze

1 complex logic constructs correctly could prove essential for understanding how  
2 complicated binary gene regulatory networks behave if under the control of the daily  
3 rhythms of a circadian clock (LOWREY AND TAKAHASHI 2004; DOHERTY AND KAY 2010;  
4 ZHANG *et al.* 2014a). Logic modelling of various genetics problems has a long history  
5 (COTTERMAN 1983; OPITZ 1983; CROW 2001) and a bright future helping us to  
6 understand many diverse aspects of gene networks and their modular structures (MITRA  
7 *et al.* 2013; LE NOVERE 2015; SAEZ-RODRIGUEZ *et al.* 2016).

8  
9 **Formal systems of logic are usually not logical enough for biology.** This  
10 paradox is easily resolved by contrasting the complexity of biology with the simplicity  
11 typical for formal logic systems. Errors of omission in formal logic limit its ability to  
12 express corresponding biological statements efficiently. Omissions have been found to  
13 be among those types of errors that are most difficult to detect (PANKO 2016).

14 Our own work on FlyClockbase confirms the substantial frequency and cost  
15 associated with errors of omission. Table 5 reports a substantial discrepancy between  
16 two types of error rates observed during our exhaustive in-depth re-check of each time  
17 series that could in principle affect our main conclusions regarding the variances of  
18 peak timing that differ between PER and TIM. Some types of errors could be  
19 characterized as ‘simpler errors’ like obvious swaps or typos in FlyClockbase itself. As  
20 expected (PANKO 2016), these simpler errors occurred at much lower rates (affecting  
21 cells of spreadsheets at rates just below 1%). In contrast, we detected a bit over 10% of  
22 all time series when re-checking our meta-analysis for systematic errors such as  
23 inadvertently omitting agreed-upon steps from routine analyses by trained curators.  
24 Much work in our study went into ensuring that important rules were indeed  
25 implemented in all applicable cases.

26 The unlimited potential of omissions to confound biological results repeatedly  
27 creates ‘important biological investigations’ aiming to determine whether a given  
28 biological conclusion might have been compromised by faulty logic (see our own  
29 examples above, where we excluded too much data). While these investigations can be  
30 essential for progress in biology, execution often involves excessive, tedious, ‘non-  
31 biological’ work towards finding elusive ‘needles in haystacks.’ This metaphor easily  
32 takes on ever more complicating levels of nesting when the logical ‘needles’ in question  
33 actually consist of errors of omission; finding them can be as challenging as identifying  
34 entirely new logical blind spots for the first time. These challenges were felt throughout  
35 the development of FlyClockbase from start to finish on numerous occasions, which  
36 were too many to track beyond a few illustrative examples.

37 *Data quality, plot quality, and task completion.* One specific time series figure  
38 seemed such a perfect interpretation nightmare that preventing publication of figures  
39 like it might be counted as a donation towards supporting FlyClockbase. This figure  
40 provided the initial illusion that it shouldn’t be too difficult to unambiguously decide  
41 which data point belonged to each of its different time series. However, when actually

1 attempting to extract the values, it slowly became clear that achieving unambiguity was  
2 impossible because the figure had been irreversibly degraded to the point where its  
3 semantic reproducibility was no longer complete (LOEWE 2016). The reason was an  
4 unlucky combination requiring *all* the following factors controlled by different entities: (i)  
5 the authors' decision to combine all these time series into a single plot, (ii) miniscule,  
6 similar plot symbols, chosen by the authors or the plotting software, (iii) a very low scan  
7 quality for the figure, chosen by the publisher, and (iv) substantial overlaps of some of  
8 the time series, chosen by nature.

9 *Cost.* Aiming to collect all relevant data, we did not want to allow for arbitrary  
10 decisions that excluded plots due to a curator's fleeting perceptions of potential  
11 difficulties. It took several independent rounds of revisiting by the three most  
12 experienced curators and repeated discussions among them before all agreed on the  
13 irresolvable nature of this figure's ambiguities. In total, we spent more than four hours  
14 trying to resolve ambiguities (excluding time for finding and initial digitizing). In contrast,  
15 it might only have required 10 min of the person producing the figure to choose plot  
16 settings that would have completely eliminated more than four hours of work for us.  
17 From this we concluded: (i) FlyClockbase needs a reliable mechanism to help future  
18 curators avoid such known time killers (e.g.: 'KK' in POST LOEWE 2016) in the absence  
19 of substantial new information. (ii) Efforts such as FlyClockbase need to find principled  
20 ways for protecting their limited time resources against irresolvable ambiguous plots or  
21 dataset, without delegating decisions on the inclusion of data to a moment's fleeting  
22 perceptions of a single curator. (iii) It might pay huge dividends across all sciences if a  
23 targeted effort could improve the clarity of plots produced by typical default settings.

24 *Implications for Logic.* This example highlights the recurring observation that  
25 managing challenging tasks like the one discussed above might benefit from two  
26 different dedicated *BioBinary* values, one for 'progress of the work', one for 'results of  
27 the work'. Using the *OKScale* in FlyClockbase, a 'Progress BioBinary' could store:  
28 Progress: *KO* (not started), *OKO* (working), *OK* (done), *MIS* (incomplete because  
29 problems occurred). Similarly, a 'Result BioBinary' could store: Result: *KO* (has errors),  
30 *OKO* (intermediate), *OK* (completed), *MIS* (missing).

31  
32 **How to detect logic errors in FlyClockbase.** The detection of logic errors can  
33 be greatly accelerated by open discussions that invite outsiders to share their  
34 observations freely. This could greatly improve the quality of FlyClockbase if this could  
35 be made efficient. One of the most notorious bugs is error by omission. This is equally  
36 true for omissions in typical program source code as it is in the analysis of biological  
37 observations. Omissions are hard to find anywhere (PANKO 2016) and can affect the  
38 reproducibility of results (HUANG AND GOTTARDO 2013) at great cost to science  
39 (FREEDMAN *et al.* 2015a). Clearly, a well-defined formal system of logic that is capable of  
40 handling biology's complexities would be a great asset for FlyClockbase and VBIRs in  
41 general. It's formal axioms and rules would exclude many options as impossible,

1 thereby helping researchers to save time by avoiding many fruitless investigations and  
2 focusing attention on options of likely interest. Pivotaly, such a logic would achieve  
3 these aims by providing a conceptual base-line for establishing the few potentially real  
4 omissions that need to be considered, while keeping infinities of useless speculations  
5 and contradictions from interfering with productive research. If correct, such a logic  
6 would be extremely useful for FlyClockbase. However, to the degree that it is  
7 misleading, its adoption would waste critical research capacity and lower the chances of  
8 uncovering such problems, because people in general rarely question an adopted logic,  
9 even if misleading. Thus, using *any* formal logic for understanding complex real-world  
10 biology is a double-edged sword, which cannot be avoided when studying mechanisms,  
11 including those of clocks in flies.

12 The idea that a formal logic for biology could facilitate biological research was  
13 first expressed only a year after Turing defined the essence of computing (TURING 1936;  
14 WOODGER *et al.* 1937). Yet, general mutual inspiration aside, it has been difficult to  
15 develop a more general formal logic that “makes better logical sense in biology” Most  
16 researchers strongly prefer to collaborate on much more specific questions they  
17 understand comparatively well, and experts in logic do not often engage with the  
18 uncertainty of biological observations. Hence, it has been much easier for most  
19 researchers to produce successful special-purpose computing tools for biology, than to  
20 arrive at more general solutions. For example, a sorely needed general-purpose  
21 programming language designed by biologists for biologists is not available despite all  
22 research in bioinformatics, computational biology, and systems biology so far.  
23 A credible effort to produce such a language, requires experienced experimental  
24 biologists as prime partners on the very same table, where expert logicians design the  
25 formal aspects of a logic for biology in numerous iterations. The expressivity of such a  
26 logic needs to be tested by its ability to represent actual real-world wet-lab or field-  
27 expedition observations. Working on FlyClockbase as described in Figure 11 provided  
28 us with such a rare opportunity.

29 Identifying omissions in the logic of a complex system does not necessarily  
30 provide the right resolution and exceedingly many partial workaround solutions are  
31 usually found much faster. Such quick-fixes offer immediate relief, albeit at the cost of  
32 increasing accidental and historic complexity inessential to a system’s function  
33 (RAYMOND 2003). Without mechanisms for removal, the accumulation of such special  
34 case stop-gaps will eventually increase the complexity of a system until it collapses  
35 under its own rules. At this point, new potential users will no longer be able or willing to  
36 invest the time needed for learning how to navigate the system’s idiosyncrasies.  
37 FlyClockbase will not be able to escape this eventual fate, if its data model is not  
38 carefully guarded against these problems. Inessential complexity creates numerous  
39 difficulties in many contexts, which include defining programming languages, logics, or  
40 type systems in computer science (PIERCE 2002), rules of operator precedence (RAZALI

1 *et al.* 2015-10-26), designing data models, databases, or data integration frameworks  
2 (DE TRE *et al.* 2004; DOAN *et al.* 2012), maintaining a user-friendly organization for large  
3 libraries, information resources or hard drives, and constructing ontologies, taxonomies,  
4 modeling frameworks, or query languages (VAN RENSSSEN 2005; ZEIGLER AND HAMMONDS  
5 2007; RUBINSON 2014; ARP *et al.* 2015; HAZBER *et al.* 2015). With a bit of abstraction, the  
6 shared root of these problems might be summarized by asking: “What is the best  
7 description of a complex world with all its possibilities for nesting, linking, traveling, and  
8 communicating?” The relevance of such logic research for FlyClockbase, is that it  
9 greatly simplifies managing the complexities of consistently handling inconsistent  
10 biological data in FlyClockbase.

11  
12 **Error handling in the face of uncertainty.** No *VBIR* of sufficient complexity will  
13 be free of errors. This certainly also applies to FlyClockbase. The question is, how to  
14 handle errors. Problems with tracing the identity, availability, accuracy, precision, and  
15 reliability of data have been the topic of numerous investigations in various contexts,  
16 some of which involve big data (e.g. see (REASON AND MYCIELSKA 1982; REASON 1990;  
17 REASON AND HOBBS 2003; GOLDSTON 2008; DOAN *et al.* 2012; GITELMAN 2013; GRIMES *et al.*  
18 2013; McCALLUM 2013; REASON 2013; BLANKENBERG *et al.* 2014; REASON 2015)).

19 *Opportunities.* FlyClockbase presented us with excellent opportunities for  
20 exploring numerous important issues for complex *VBIRs* aiming to integrate data that is  
21 imperfect in some form, such as being incomplete, uncertain, contradictory, erroneous  
22 or scattered across a wide range of sources. Any of these conditions occur frequently in  
23 biology. It is beyond the scope of this study to explore all such challenges faced by  
24 every biologist, whether she’s aware or not; in the Supplemental Material we describe a  
25 few of the insights gleaned from our work on FlyClockbase. These could be  
26 summarized as follows.

27 *Challenges.* Any information resource of substantial biological interest will quickly  
28 grow to a complexity at which it will inevitably accumulate a substantial amount of  
29 human errors that are difficult to detect by human users. Many independent repeats of  
30 biological information are typically associated with large amounts of genuine biological  
31 variability. In many current biological databases, it can be difficult to distinguish such  
32 genuine variability from artificial variability that is easily caused by human errors of  
33 various well-known types. Such errors span a broad range of different complexities and  
34 corresponding frequencies. For example, simple typos or label swaps usually occur at  
35 low rates such as 1%, see (PANKO 2016). Simple logic errors occur at substantially  
36 higher rates, especially in spreadsheets (PANKO 1998; PANKO AND AURIGEMMA 2010;  
37 PANKO 2013; PANKO 2016). However, errors of omission are usually the hardest to find  
38 (PANKO 2016). This is especially true, when an omission has become part of a logic  
39 formalism. This is one reason, why it is so important to use good approaches to  
40 represent *Null* (WHITE *et al.* 2013), and why it can be dangerous to confuse different

1 types of *Null* (WARAPORN AND PORKAEW 2008; HOARE 2009; THALHEIM AND SCHEWE  
2 2011). FlyClockbase has experienced *Null*-confusion already. Entries in a *DZT* column  
3 define an hour of the day. We initially allowed *DZT=0h* as a valid time, excluded *24h*,  
4 and defined 'absence' as '*NotGiven*', a particular type of '*Nothing*'. However,  
5 understanding '*Nothing*' correctly is difficult. Hence, it is unsurprising when biological  
6 model curators occasionally allow well-known intuitive algebraic properties of addition to  
7 affect their views of 'Null'. As a result, '*0 apples*' is correctly interpreted as '*no apples*';  
8 yet it may fuel the erroneous idea of equating 'time not observed' and 'adding zero to a  
9 list of hours. In this case, some *DZT=0* values are correct and some are not, but  
10 checking correctness is complicated and expensive. This test becomes trivial, if *24h* is  
11 included as a valid time, and *0h* is defined as always invalid. For more details on such  
12 challenges, see also discussion of the BioBinary data type in the Supplemental Material.

13 *Trans-disciplinary solutions.* Several non-biological areas of research and  
14 technology, such as computer science, space flight, and nuclear reactor safety have  
15 developed sophisticated approaches for detecting and correcting potential human errors  
16 (NASA *et al.* 2001-09-30; NASA *et al.* 2006-07; NASA *et al.* 2011; PANKO 2016). While  
17 designers of biological information resources can learn much from the decades of  
18 research that informed the development of human error analysis tools in those areas, it  
19 is less straight forward how these insights could be applied to improve the quality of  
20 biological information available to most biologists. A source of concern is the substantial  
21 complexity of many human error analysis frameworks (REASON AND MYCIELSKA 1982;  
22 REASON 1990; NASA *et al.* 2001-09-30; REASON AND HOBBS 2003; NASA *et al.* 2006-07;  
23 GOLDSTON 2008; NASA *et al.* 2011; GITELMAN 2013; GRIMES *et al.* 2013; MCCALLUM  
24 2013; REASON 2013; BLANKENBERG *et al.* 2014; REASON 2015; PANKO 2016). Most of  
25 these frameworks will handle the complexity of biological data, but require near  
26 prohibitive research and implementation efforts that make integration into grass roots  
27 *VBIR* projects such as FlyClockbase not efficient if started by biologists. However, that  
28 does not imply that sophisticated approaches cannot contribute to solutions, even if  
29 *VBIRs* curators do not bring the expertise necessary for implementing a framework. To  
30 see how this might work requires a look at an advanced area in computer science that  
31 is not readily accessible to many: compiler construction.

32  
33 **Error analyses could be amortized across *VBIRs* by compilers.** As argued  
34 above, appropriate error analyses for a single *VBIR* are not feasible. However, our  
35 experience with developing FlyClockbase suggests that a substantial number of  
36 essential tasks are recurrent when compiling any *VBIR* of comparable complexity.

37 *Efficiency.* Thus, the most efficient solution to improving the quality of *VBIRs*  
38 without exploding costs is to develop an automated compiler that can test for all known  
39 *VBIR* problems and that supports a programming language that integrates biology  
40 expertise (LOEWE 2016). Programmers frequently say that it is important to use the right



1 tool for a given programming task. Despite numerous biology-oriented libraries for non-  
2 biological programming languages (e.g. (STAJICH *et al.* 2002)) no general-purpose  
3 programming language exists yet for supporting typical compiler-style consistency  
4 analyses for general complex *biological* datasets like *VBIRs*. We will not repeat here the  
5 substantial number reasons why such a language would be helpful and why current  
6 (non-biological) programming languages are insufficient (see Supplemental Material  
7 and additional reasons discussed in LOEWE *et al.*(2017)).

8 *Examples.* Such a compiler could address tasks such as the following. There is a  
9 need for handling missing data, inapplicable data and similar cases by choosing  
10 appropriate representations that distinguish these cases instead of lumping them  
11 together as 'NA' or the value zero (e.g. (CANDAN *et al.* 1997; WHITE *et al.* 2013)). All  
12 biological measurements will always come as imprecise ranges, not as precise values.  
13 Measurement methods for a given observation are usually heterogeneous and need  
14 some description. Observations can be made in may be compared between various  
15 *MethodRealms*, like *in vitro*, *in vivo*, or *in silico*. Comparisons between wildtypes and  
16 mutants are frequent. Synonyms are almost ubiquitous. It is easy to continue this list  
17 with many other aspects of biological interest. In addition, there are data processing  
18 basics, such as the ability to read in all tables of FlyClockbase and produce a report of  
19 all inconsistencies and errors that require human attention. The arrival of big data has  
20 brought substantial experience with questions of data hygiene (GOLDSTON 2008; HOWE  
21 *et al.* 2008; KRISHNAMURTHY *et al.* 2011; GITELMAN 2013; MCCALLUM 2013; SCHUTT AND  
22 O'NEIL 2013; MAHMOOD 2016; ZWEIG 2016). Most of this expertise is also essential for  
23 correctly and efficiently handling data in *VBIRs*. For all features like those above and all  
24 error types detected, a solution only needs to be implemented once for simultaneously  
25 improving the reliability of all *VBIRs*.

## 29 **PopGen predictions on FlyClockbase survival and success**

30  
31 Most new versioned biological information resources (*VBIRs*) such as FlyClockbase  
32 face a dizzying array of potential paths into the future, not unlike newly mutated alleles  
33 in a population. As population geneticists have learned, all this complexity can be boiled  
34 down to two essential outcomes (KIMURA 1962): all alleles are either kept or lost  
35 eventually. To explore other useful aspects of this analogy, we will abstract a few brief  
36 lessons from population genetics that also apply to collections of information.

37  
38 **The stage.** If seen in such a general way, a newly arisen DNA-allele could be  
39 compared to a newly published *VBIR* similar to FlyClockbase or a newly developed tool  
40 in bioinformatics (thereby accessing a broader pool of historic precedents). Both alleles

1 and *VBIRs* contain new information, stored in DNA or on computer hard drives  
2 respectively. Both are part of their ecosystems, which belong to different realms. An  
3 allele exists in carbon-based organisms that compete for natural resources in a  
4 population where the allele may be kept indefinitely. Omitting replication details allows  
5 for simplification. One could think of alleles as replicators based on DNA; similarly,  
6 memes were originally defined as replicators in mindspace (DAWKINS 1976). Thus like  
7 FlyClockbase, each *VBIR*, can be seen as a meme that competes for the ‘mindshare’ of  
8 humans potentially interested in a given topic. Technically, memes are units of  
9 information that usually spread through communication and compete for the limited  
10 attention of individuals and communities, irrespective of their success of replication  
11 (DAWKINS 1976; LYNCH *et al.* 1989; GLEESON *et al.* 2014; DAWKINS 2016; HE *et al.* 2016).  
12 These generic features result in mechanisms similar to those of population genetics,  
13 which we use here to derive informal expectations for the future of FlyClockbase and  
14 similar *VBIRs* (a formal theory is beyond our scope). We do so hoping to avoid the most  
15 likely outcome, the complete loss of FlyClockbase, by aiming to increase the chances  
16 that FlyClockbase will be kept in the population of useful *VBIRs*. We next reinterpret  
17 concepts like aging, death, growth and reproduction from the perspective of *VBIRs*;  
18 Incomplete Fitness Traits (IFT) like these combine with a given environmental context to  
19 define fitness in biological evolution (LOEWE 2016). Even without a quantitative meme  
20 model, we expect qualitatively similar outcomes when translating IFTs to the realm of  
21 *VBIRs* memes. In many cases this will suffice to make decisions that increase the  
22 chances of survival for FlyClockbase.

23  
24 **Aging and death.** *VBIRs* are aging if they degrade without the time and energy  
25 investments necessary for maintaining their semantic reproducibility (LOEWE 2016); they  
26 are on their deathbed when nobody wants to use them anymore, and are buried once  
27 nobody can remember them. Potential causes of death vary with age and include (i)  
28 being locked into remaining an exploratory toy ‘too simple’ for any real use, (ii) being  
29 ‘too simple in comparison’ from a lack of features that could have helped fight  
30 competing *VBIRs* and win over their human users, (iii) having become ‘too complicated’  
31 for real-world users after years of accumulating inessential complexity (RAYMOND 2003),  
32 and (iv) many other causes from internal specifics to external generics (such as political  
33 decisions).

34  
35 **Growth and reproduction.** *VBIRs* can grow in various respects, some helpful,  
36 some harmful, and some hard to assess. We use ‘growth’ here only in a narrow sense  
37 for helpful traits like features required by users. In contrast, we denote as ‘aging’ the  
38 growth of harmful traits like inessential complexity, whereas the reduction of such  
39 complexity can be seen as growth (e.g. by simplifying an interface to save user time).  
40 Likewise, the loss of useful features can be seen as aging caused by semantic

1 irreproducibility. For example, this could be caused by incompatible changes in required  
2 software packages. Here growth always affects the quality of the best implementation of  
3 a *VBIR* type, in contrast to reproduction, which could be seen as increasing its  
4 mindshare through favorable communication and/or copying the *VBIR* data to new  
5 servers (presumably to win new voluntary users). Thus, growth and reproduction in this  
6 sense are likely to help a *VBIR* to spread and increase its fitness.

7  
8 **Speciation and merging.** The same is not usually true for processes  
9 comparable to speciation. The ‘forking’ of a *VBIRs* or any other software or data  
10 collection into two independent lines of development is often perceived as an  
11 unwelcome increase in complexity by users without a stake in the details (e.g. Python 2  
12 vs Python 3). This implies that the reduction of independent lines of development should  
13 be welcomed, but reality is more nuanced. A reduction from merging without loss of  
14 features is positive.

15  
16 **Extinction.** However, sometimes it is impossible to save all features due to  
17 mutual incompatibility or other constraints; this might be comparable to extinction,  
18 where good features are irredeemably lost to global mindshare. If occurring to all  
19 development lines of a *VBIR* (e.g. due to catastrophic environmental changes such as  
20 ‘loss of funding’), then the loss is usually tragic, even if the *VBIR* is preserved as a fossil  
21 on cutting-edge archives of its time (like floppy disks, CDs, bioinformatics journals,  
22 websites, and various open source repositories). As in real life, software fossils are  
23 rarely revived, an act that would require extra-ordinary semantic reproducibility as  
24 defined elsewhere (LOEWE 2016). Semantic reproducibility is very difficult to achieve, as  
25 seen and further discussed in the source code for the statistical analyses in this study  
26 and the discussion of the ‘DISCOVARCHY’ documentation style (see Table D1 in the  
27 Supplemental Material). In both cases, it is much more likely to lose fossils to changing  
28 environments and random damage than to revive them successfully. Furthermore,  
29 chances of successful reactivation drop dramatically in both cases, as bacteria are  
30 easier to revive than dinosaurs, and old algorithms for merely sorting numbers are  
31 reused more easily than the software systems that put a man on the moon (though we  
32 do not wish to imply that either is possible). Extinction can happen to any *VBIR*, no  
33 matter how well known. Some planning can usually ensure preservation of a fossil form;  
34 ideally a tombstone will inform would-be users where the fossil is archived (see  
35 Supplementary Material).

36  
37 **Horizontal gene transfer.** As we watched the evolution of FlyClockbase we  
38 witnessed a number of remarkable exchanges of information. Our experiences have  
39 played out in the conceptual arena defined by Figure 11: we started as initiators,  
40 completed the substantial integration work presented here, and have used

1 FlyClockbase for research purposes (see Results). At the same time one of us has been  
2 deeply engaged with developing the compiler architecture for the Evolvix modeling  
3 language, aiming to meet particular requirements of biology. This combination of aims  
4 has enabled a substantial flow of critical design information that has benefitted all sides.  
5 Compiler architects benefit from first-hand exposure to challenging practical problems in  
6 logic and data modeling in the domain of their target audience, while biologists are kept  
7 from computationally short-sighted quick-fixes that otherwise could easily wreck a *VBIR*  
8 on the longer-term. Such collaborations are powerful opportunities for uncovering and  
9 clarifying misconceptions on all sides and at all levels; in our experience, they greatly  
10 improve the conceptual quality and robustness of resulting solutions, but come at the  
11 expense of the rate at which some more tangible results can be produced. Combining  
12 these costs with those of human error analyses (see above) when developing reliable  
13 *VBIRs* increases costs substantially, often prohibitively.

14 *Practically*, we advocate that *VBIRs* do not reinvent the wheel of reliability  
15 independently. This unnecessary reimplementing work is expensive and substantially  
16 increases costs of developing and maintaining a *VBIR*. A thorough analysis of historic  
17 sources of funding for various existing *VBIRs* has exposed a lack of support for this  
18 critical work that integrates, consolidates, and checks the quality of data in *VBIRs*  
19 (EMBER *et al.* 2013). An overview of these essential tasks in the context of FlyClockbase  
20 is given in Figure 11. Here we suggest that much of these costs could disappear if the  
21 initiators, integrators, and researchers working with a *VBIR* would have efficient means  
22 of passing on their formal needs for data representation and analysis to the architects of  
23 an integrative compiler. From their integrative perspective, these architects could then  
24 provide solutions that are compatible and interoperable for many *VBIRs*. Support for  
25 such a versatile open source compiler-building project that serves the *VBIRs* community  
26 well would not nearly be as expensive as independently solving this problem repeatedly.  
27 Experience indicates that well-maintained tools do get used; such a project could hence  
28 substantially contribute towards closing the critical funding gap highlighted by a  
29 thorough analysis elsewhere (EMBER *et al.* 2013). Here is not the space to provide a  
30 reasonable overview of the many aspects of working towards an integrated compiler  
31 architecture. Informed by experiences with FlyClockbase, the tips of several icebergs  
32 are touched in Figure 11. It lists important needs of various contributors, and specifies  
33 several types of lessons learned by *VBIR* contributors and services provided by the  
34 compiler and its construction team envisioned here. This work generally occurs in three  
35 broad stages of integration: combining fragmented insights gleaned from work on  
36 FlyClockbase, investigating broader designs, and integrating solutions into a single  
37 coherent architecture. The high-level analogy of aging and growth in *VBIRs* plays out on  
38 the background summarized by Figure 11. The values of such *IFTs* governing the  
39 evolutionary trajectory of *VBIR* meme evolution are determined by the hundreds of  
40 small implementation decisions necessary for arriving at an overall coherent *VBIR*

1 organization perceived as elegant, expressive, useful, efficient, and overall simple  
2 enough to be worth a user's while. Such simplicity is pivotal for engaging anonymous  
3 users with a *VBIR* (or any other meme), especially since many are suffering from  
4 information overload, data smog, and the resulting paradox of choice (SHENK 1997;  
5 SCHWARTZ 2004). Physics is not the only discipline where theory should be "as simple  
6 as possible, but not simpler" (EINSTEIN AND CALAPRICE 2011).

7  
8 **Potential predictions.** So, what can we learn from population genetics to  
9 improve the long-term usefulness of FlyClockbase? We do not aim to exhaustively list  
10 all general lessons but rather present several possibilities of likely interest in the bigger  
11 picture that we expect based on population genetics theory. This will allow readers to  
12 connect additional dots between more detailed requirements and solutions presented  
13 above as well as in the Supplemental Material. As we review the following potential  
14 paths into the future we interchangeably use the terms 'FlyClockbase', 'new allele',  
15 'bioinformatics tool', and *VBIR* to reduce repetition.

16  
17 **Loss is likely** for all new information. Population genetics theory shows that  
18 most newly arisen alleles are lost very quickly by the random sampling that occurs  
19 between generations (KIMURA 1962). All alleles have to navigate this hurdle, regardless  
20 of how beneficial they might otherwise be. Observing bioinformatics research quickly  
21 reveals a similar pattern: on the web very many tools start out (and fizzle out),  
22 professional researchers ensure that at least one peer-reviewed publication exists (but  
23 lack the time to keep websites and tools from breaking), enthusiastic programmers will  
24 keep tools working (but are happy with little documentation), good software engineers  
25 understand the value of organization and documentation (but usually do not work in  
26 biology). All new tools and resources face an intimidating phalanx of these and similar  
27 dilemmas, which made us think hard about all possible avenues for simplifying the  
28 overall system while increasing flexibility. First lesson: FlyClockbase is no exception and  
29 faces the same challenges. It may sound strange to discuss death in the context of a  
30 birth that we believe is to be celebrated. However, ignorance is not a good defense  
31 against child mortality.

32  
33 **Loss is fast and 'child mortality' matters.** Alleles that have just arisen by  
34 mutation and new bioinformatics tools that have just been published also share another  
35 important detail: they will probably be lost very soon. Except for extremely harmful  
36 alleles, initial survival for good and bad alleles depends almost entirely on the individual  
37 that carries them. Therefore, FlyClockbase must travel as light as possible if it is to  
38 survive. Like other *VBIRs*, it must be able to fit it into the life of a single publicly known  
39 person who can act as a synchronizing point of contact for coordinating further work  
40 (even if not done by that person). Such public maintainers of *VBIRs* are probably  
41 extremely busy and will have very little time and energy left for high-maintenance

1 solutions. This excludes the use of many great database technologies that unfortunately  
2 shower their users regularly with recommended updates with various degrees of  
3 compatibility and urgency. Without a highly-automated process, such updates would  
4 prohibitively increase the rate of aging for FlyClockbase or the energy required to  
5 maintain it. Accordingly, we have been developing approaches to simplify life with  
6 *VBIRs* like FlyClockbase, but much more remains to be done. Our various strategies for  
7 simplifying are discussed above and in the Supplementary Material. Laurence Loewe  
8 has agreed to be the first public maintainer of FlyClockbase and will post updates to the  
9 GitHub website given at the beginning of our description of FlyClockbase.

10  
11 **Fossilization is usually deadly.** An easy way of avoiding the loss of a project  
12 from a broken hard drive is to submit it to a public repository such as Github. This  
13 ensures a form of travelling light, as everything stays in place, if a maintainer does  
14 nothing (maintenance cost is near zero, and mostly a thought and a password). This  
15 establishes a minimalistic baseline, as the mere existence of data (or ancient code, see  
16 above) does not differ much from fossils, which are awkward to access, dry and brittle to  
17 work with, and for all practical purposes impossible to revive. Lesson three: If nobody  
18 continues to work with the code, then chances are that it has already fossilized. Thus,  
19 we next review steps that are likely to facilitate future work with FlyClockbase.

## 20 21 22 23 **Next practical steps for FlyClockbase**

24  
25 In order to raise the chances of survival and success as described above, we are  
26 working towards implementing the following practical steps that improve the  
27 organization of FlyClockbase and move it towards increased stability.

28  
29 **Reorganize files, define versioning policy and simplify folder structure.** It is  
30 very frustrating to work with a project where everything can move (and break) at a  
31 moment's notice. Nascent resources never really know what awaits them, and  
32 FlyClockbase has not been different. As a result, our time series data has seen more  
33 profound reorganizations of its storage space than any of us had anticipated. Some of  
34 this additional work was due to the fact that we were simultaneously developing crucial  
35 technological underpinnings, such as TabFS (Figure 11) and the POST system (LOEWE  
36 2016). We also did not have a stepwise guide on *VBIR* construction with an overview  
37 roadmap from an expert, which could have further reduced the work. However, as  
38 indicated in Figure 11, the initial phases of a *VBIR* will always be special: each *VBIR*, by  
39 definition, is ill-defined at its inception and negligibly small. As it starts growing, it  
40 is restructured, renamed, and reorganized many times while in its 'embryonic' form. While  
41 guidance helps, some messy aspects of initiating a *VBIR* are probably impossible to

1 avoid if the freedom is retained to develop any *VBIR* supporting any research. Figure 11  
2 makes a clear distinction between this early more informal stage and the subsequent  
3 iterations managed by integrators. While much of the work of integrators is also done at  
4 the initiator stage, *VBIR* publication marks a milestone. It is an excellent opportunity for  
5 internal restructuring and cleanup that should not be dismissed lightly, as reorganizing  
6 will never be as easy again. This is particularly true if the versioning system changes.  
7 Long-term resources require stabilizing versioning systems right from the start to reduce  
8 inessential complexity and confusion. FlyClockbase will build on the *StablizingZone*  
9 (LOEWE 2016) of the POST system. These needs motivated us to delay publication of  
10 FlyClockbase while still under review.

11  
12 **Use a public distributed version control system to be efficient.** The use of  
13 Git for version control is rising and services like <http://github.com> allow open source  
14 projects to be published ‘at no cost’. Not having to pay for leaving code in a published  
15 state increases chances of avoiding ‘death by negligence’ for many *VBIRs*. More  
16 importantly, using Git allows *VBIR* collaborators to essentially cut the huge costs of  
17 manually performing the search and merge operations regularly required for close  
18 research collaborations. We have experienced enough of these complex operations to  
19 appreciate the huge value provided by Git and have decided to use it for FlyClockbase  
20 (currently in a closed repository using <http://gitolite.com/gitolite/> ). However, using Git is  
21 not free of costs. At first these seem reasonable: learn how to use Git and avoid  
22 advanced moves that get ‘the rest of us’ into serious trouble (including loss of data).  
23 However, in our experience, Git idiosyncrasies and the complexities of version trees  
24 pose such formidable barriers for most biological users, that tool adoption requires a  
25 large activation energy, even when using excellent graphical user interface software  
26 (albeit developed for programmers). We have found an approach for getting biologists  
27 to work with reasonably well with Git. It currently requires determination, detailed  
28 instructions, an expert who performs all operations except the very simplest, and who  
29 happily explains everything again until users follow the instructions (cleaning up the  
30 mess, if they do not). Given the outstanding efficiency of Git, not just for FlyClockbase,  
31 motivated us to explore how to hide our simplified Git workflow behind scripts called  
32 when users ‘hit a button’. While our design requires more development and testing, our  
33 internal results so far suggest that it will be more than worth the effort develop this for  
34 FlyClockbase (and reuse for other *VBIRs*). We highlight all this because many biologists  
35 seem unable to imagine how much more efficient the development of a *VBIRs* can be if  
36 Git works as it should. Conversely, many Git users seem unable to imagine why some  
37 biologists prefer to explore every non-Git option first, irrespective of cost. We found that  
38 some of these ‘attractive’ alternatives can easily turn into complexity traps or create  
39 serious bottlenecks for development. This is in particular true for the prevalent mode of  
40 distributing supporting material for journal articles, which allows reading data from files  
41 without the ability to write back. Such immutability is good for ensuring well-defined

1 versions, but unless there are files that can actually be updated in place, it will be very  
2 difficult to efficiently work with the data. Complications can abound when manually  
3 merging two sets of text files, each with changes that accumulated in separately  
4 evolving lines of revision descent. Since not all combinations have been tested together,  
5 some could trigger prohibitive integration problems comparable to the severity of  
6 Dobzhansky-Muller Incompatibilities known from evolutionary genetics (COYNE AND ORR  
7 2004). In this analogy, using a system like Git for regularly merging all new changes into  
8 a single main line of revision descent is comparable to keeping all individuals in one  
9 large population. This efficiently prevents the accumulation of the source-code  
10 equivalent of Dobzhansky-Muller Incompatibilities and is desirable for improving one  
11 *VBIR* that serves a single purpose. Thus, typical archival data storage is not ideal for  
12 FlyClockbase and similar *VBIRs*; we therefore chose Git and aim to mitigate its less  
13 than ideal aspects.

14  
15 **Develop TabFS.** For decades, there has been no shortage of databases, file  
16 formats, file systems, and other types of storage - all with unique strengths and  
17 weaknesses. There is no universal agreement on how to best store complex data  
18 transparently. Text-based formats that distribute data across folders in a file system  
19 provide instant and continuous access to content that is easy to read and write for  
20 humans. This flexibility does not depend on any special tools that could break. However,  
21 such transparency benefits are balanced by the need to ensure consistency in the  
22 presence of notoriously inconsistent human users. While binary formats increase speed  
23 and consistency, they complicate *VBIR* development and create costly dependencies on  
24 special tools for reading or writing *any* data. As *VBIR* development requires biological  
25 model curators to easily modify the data model of a *VBIR*, we decided against using  
26 existing excellent binary technologies such as ProtocolBuffers  
27 (<https://developers.google.com/protocol-buffers/> ) and HDF5  
28 (<https://www.hdfgroup.org/hdf5/> ). For these and other reasons detailed in the  
29 Supplemental Material we decided that *VBIRs* and TabFS require human readable text-  
30 based file formats. Appropriately reviewing these is beyond the scope this paper, but  
31 some recurring patterns provide food for thought. For example, the text-based  
32 'eXtensible Mark-up Language' (XML) and the representation independent 'Abstract  
33 Syntax Notation One' (ASN.1) are both widely used, formally defined  
34 ( <https://www.w3.org/XML/> - <https://www.ncbi.nlm.nih.gov/Structure/asn1.html> ) and  
35 demonstrate the following possibilities for data storing file format standards:

- 36 1. it is possible to define broadly applicable standards that maintain a very simple and  
37 stable core set of features (encouraging simplicity in TabFS);
- 38 2. combining a few built-in data types with arbitrary nesting and repeating of user  
39 defined data types can inspire multitudes of specific extensions (suggesting TabFS  
40 will need to help users navigate diverse complex *VBIRs* code contributions to  
41 reduce complexity and unnecessary reinvention);



- 1 3. fierce competitors are capable of adopting shared standards resulting in win-win-  
2 win outcomes for both competitors and the general public; see the use of ASN.1 in  
3 telecommunication (and also by NCBI, see link above; the research benefits of a  
4 system that significantly simplifies the sharing of complex biological data are  
5 undisputed; developing FlyClockbase across the Win-Mac divide together with the  
6 Project Organization Stabilizing Tool (POST) system (LOEWE 2016) by using the  
7 process in Figure 11 led to major TabFS design ideas that could simplify current  
8 challenges enough to motivate grass-roots adoption; details beyond scope here);
- 9 4. the rise of simple text-based XML could not quench the need for even simpler text-  
10 based file formats that are popular for simplicity where it matters (suggesting TabFS  
11 needs to provide comparable ease of use);
- 12 5. simplistic file formats are insufficient for representing many types of biological  
13 complexity and will therefore never be adopted universally (suggesting TabFS must  
14 handle arbitrarily complex data in elegant ways).

15 Comma Separated Value files (CSVs) and the equivalent tab-delimited table files of  
16 TabFS are still particularly convenient file formats of choice due to their simplicity and  
17 extraordinary broad interoperability. Research collaborations frequently share data  
18 across very different systems. Thus, a file format that can easily be read and written  
19 everywhere remains competitive against faster rivals that do not work everywhere.  
20 Unfortunately, CSVs store only values, but cannot store types and cannot directly  
21 describe arbitrary data structures. Therefore, all additional information requires  
22 extensions that are rarely standardized. Recent text-based standards like JSON (see  
23 <http://json.org> ) or YAML (see <http://yaml.org> ) cover many use-cases, but have not  
24 replaced CSVs in many contexts.

25 *Tables in their simplest form.* The two-dimensional layout of CSVs is particularly  
26 well suited for time series, arrays, and other frequent forms of biological data. CSVs are  
27 easy to read and write with spreadsheet tools that are widely used among biologists.  
28 Many experimental biologists would not hesitate to use such tools for modifying sets of  
29 CSVs but would avoid equivalent tasks in SQL databases. This fundamental usability  
30 advantage of text-based tables motivated our data storage choices for FlyClockbase.  
31 The downside to this flexibility is the lack of formally defined computational expressivity  
32 that is powerful enough to represent all the needs of *VBIRs*. Our numerous searches  
33 have brought many interesting file formats to our attention, but none approaches the  
34 simplicity and usability of CSVs while also providing a stable international standard with  
35 the features necessary for efficient *VBIRs* development. This gap surprised us.

36 *TabFS specification.* We plan to fill this important *VBIR* tool gap by developing a  
37 definition and implementation of TabFS. The TabFS specification aims to define  
38 precisely a completely open and customizable, easily accessible and usable, extremely  
39 simple and stable, maximally versatile and expressive storage system for long-term use  
40 in *VBIRs* such as FlyClockbase. Here *long-term* indicates the requirement to be long-

1 term backwards compatible as defined by the ‘*TrustedTested*’ (TT) level in the POST  
2 system defined elsewhere (LOEWE 2016). To achieve these goals, some aspects of  
3 computational speed will receive a lower priority in TabFS, as speed of *VBIR*  
4 development is more important for TabFS than speed of execution. Practically, TabFS  
5 builds on the stability of standard file systems and uses tables and other fragments in  
6 files and folders to implement well-defined conventions for storing the necessary  
7 nuances required for *VBIRs* development. A major design aim is to keep the raw  
8 convenience and efficiency of tab-delimited table text files (hence the name TabFS).  
9 Such files are easily edited by spreadsheet tools familiar to many biologists and readily  
10 imported and exported by many other systems. TabFS is developed in the context of  
11 *VBIR* development as described in Figure 11 and uses the flipped programming  
12 language design approach presented elsewhere (LOEWE 2016). Many *VBIRs* share  
13 similar problems, some of which are typical for biology. Solving them once in a reusable  
14 way can greatly contribute to the reproducibility and the sustainability of domain specific  
15 resources of digital data (EMBER *et al.* 2013).

16  
17 **16. Define a type system for TabFS.** Work towards defining each essential data  
18 type for TabFS in general and *VBIRs* in particular will need to continue in parallel to  
19 developing TabFS itself. Substantial overlap in development is essential for ensuring  
20 that TabFS provides all important capabilities for making high-level *VBIRs* development  
21 efficient while minimizing overall system complexity. Establishing a stable core of TabFS  
22 first will greatly shrink the complexity of developing a stable and consistent type system  
23 for recurrent tasks in both TabFS and general *VBIRs* development. The same  
24 mechanisms will later be used by developers of any specific *VBIR* to define a type  
25 system for their particular area that can then be enforced with the same mechanisms  
26 that protect the integrity of TabFS or general *VBIR* types. Since type systems are  
27 conceptually equivalent to ontologies at a high level (ARP *et al.* 2015), such work can be  
28 structured in work-stages that are familiar to biologists since the start of taxonomy:  
29 observe, describe, define. Practically:

- 30 1. *Observing* which types of folders, files, or fragments are useful for developing and  
31 maintaining a *VBIR* is only possible in the context of a real *VBIR* with real research  
32 problems, such as FlyClockbase. Pure thought or toy projects cannot reveal enough  
33 real-world nuisances and nuances for developing a high-quality *VBIR* type-system.  
34 The next step for the resulting list of observed entities is:
- 35 2. *Describing* at epic length in human readable text every detail about, why and how  
36 exactly each folder, file, or fragment is stored and used by expert biological model  
37 curators provides a solid foundation for the final step of explaining all this to  
38 computers:
- 39 3. *Defining* each type formally, which results in a checklist for determining the integrity  
40 of this *VBIR* type and for detecting all known errors.

1 Initially, such checklists are best developed and refined by expert users willing to accept  
2 a temporary slowdown caused by the need to document and check every step of their  
3 work, including the simplest ones (tedious for humans, essential preparation for  
4 computers). Once sufficiently detailed, these checks can be automated, enabling  
5 experts to focus their energy on complications that computers cannot currently handle  
6 correctly. Such a style of collaboration with *VBIR* compilers would allow all parties to  
7 focus on what they do best. Machines mindlessly repeat mind-numbing instruction  
8 sequences. In contrast, experts focus on activities where humans excel: apply expertise  
9 and common sense to check the integrity of computational results, think creatively about  
10 new tasks for the *VBIR* compiler, and expand the *VBIR* by exploring interesting  
11 hypotheses. Once this *VBIR* has matured enough to answer the interesting questions in  
12 its field, start a new *VBIR*.

13 For the first several *VBIRs* most contributions to such a compiler will probably  
14 focus on the basics of defining and referencing various types of memory devices, such  
15 as folders, files, file names, tables and fragments of these. A well-defined type system  
16 will greatly simplify the implementation of the consistency checks that are essential for  
17 maintaining the integrity of FlyClockbase.

### 18 **Automate TabFS checks to help expand the biology of FlyClockbase.**

19 Developing FlyClockbase, TabFS and a *VBIR* compiler for ensuring the long-term  
20 stability of *VBIRs* can be greatly facilitated by a code library implementing a storage  
21 interface for TabFS instances. Detecting formal errors, enforcing rules and limitations,  
22 ensuring the full execution of all aspects of a TabFS or *VBIR* task, and performing other  
23 jobs can then be delegated to such a storage library and will no longer consume  
24 precious development or research time. These new liberties can then be invested in  
25 expanding the reach of FlyClockbase by adding the latest biological studies, new and  
26 old mutants, and many other aspects. Additions require defining new columns or new  
27 values for the controlled lists of existing columns. Carefully reviewing anticipated usage  
28 reduces clutter in the name-spaces of FlyClockbase. This is pivotal, since column  
29 names become immutable once pronounced '*TrustedTested*' as defined (LOEWE 2016).  
30 The ability of FlyClockbase to disentangle the long-term need for stability and the short-  
31 term freedom required for *VBIR* innovation will critically depend on the early introduction  
32 of a well-thought out stabilizing version number system for FlyClockbase, lest it be killed  
33 by inessential complexity on the long run.  
34  
35  
36  
37  
38  
39

## Conclusion

This study contributes important foundations to our overall goal of improving the reproducibility, reliability, and relevance of biological data analyses, starting with observations of the *D. melanogaster* circadian clock. To this end, we aim to automate as many repetitive tasks as possible by providing computational tools that can be efficiently used by experimental biologists. Ideally, this will inspire increased adoption of computational tools and empower biologists to expand their thinking capabilities to investigate new questions. This will be required to meet current grand challenges from personalizing medicine to predicting mechanistic fitness landscapes in evolutionary systems biology (LOEWE 2016). Such types of problems often require the analysis of innumerable smaller computational models, which is impossible without highly automated information processing to cut through the associated cognitive complexity.

**FlyClockbase as a VBIR.** The resource we compiled might be able to serve as an example for a versioned biological information resource that is organized in a radically simple way by being completely accessible as tables of text. It also exemplifies what a ‘small model’ in a grand challenge context might look if comparable in size to our clock model (see Figure 1) with similar amounts of time series or other experimental data. We expect such data to be as scattered as it was for FlyClockbase. Experience with time series in FlyClockbase suggests that many other datasets are probably also likely to contain a mix of broad general trends and numerous statements that remain incomplete, imprecise and contradictory. To successfully handle this avalanche of challenges in biology, we have been analyzing observations and models of the fly circadian clock. Simultaneously we have been collecting instances, where automation by a compiler could greatly increase the efficiency of integrating biological knowledge-fragments and maintaining the integrity of a VBIR in face of common uncertainties in biological data.

**Designing a compiler for biological data.** The design of such a compiler is greatly improved in our experience, when developed simultaneously and in close collaboration with biological model curators who regularly expose compiler designers to the many imperfections of biological data. The seemingly perfect abstractions of compiler type systems need to meet the messy observations made in biology, and conversely, biological observations need to become more organized by learning from the abstraction techniques developed in computer science. Such trans-disciplinary communication is possible in our experience (see Figure 11 for an overview of the process). Consequently, our work in this study drills deep in distant areas from different disciplines, both basic and applied. The volume of relevant material forced us repeatedly to refer to Supplemental Material, the Evolvix BEST Names study (LOEWE

1 2016), or simply limit scope (usually indicated). A brief overview of the relevant research  
2 areas might illustrate these challenges for compiler construction.

3 **Trans-disciplinary aspects.** The seemingly disparate areas of enquiry in this  
4 study are deeply connected by our desire to improve the reproducibility and reliability of  
5 models in computational molecular systems biology. We study:

- 6 (i) *the molecular genetics* of gene regulatory networks in *Drosophila* circadian  
7 clocks (reviewed in Figure 1),
- 8 (ii) *the statistics of robust differences* in variance among observed time series traits  
9 (Figure 5),
- 10 (iii) *the applied mathematics of simulating* time series from Continuous Time Markov  
11 Chain models (Figure 4 lists models, leaving simulation for later),
- 12 (iv) *the behavior of modelers*, namely how they prefer to parameterize their models  
13 (Figure 4),
- 14 (v) *the human-computer interactions* that help to reduce data smog and information  
15 overload by improving visualization and organization in plots, in models, in and  
16 data structures (Figure 1,2,6,7,9),
- 17 (vi) *the statistics of detecting human errors* in spreadsheets, data analysis, logic, and  
18 source code (Figure 3, Table 5, Discussion, Supplementary Material),
- 19 (vii) *the data science of reproducibility* for improving reliability, semantic, statistic, and  
20 other reproducibility of publishable research results from the early investigative  
21 stages (see Supplemental Material, Table P1 and the ‘DISCOVARCHY’  
22 Documentation Style), and
- 23 (viii) *the computer science of compilers and programming languages* as needed for  
24 supporting the development of other biological information resources like  
25 FlyClockbase. This requires addressing a broad range of topics, including  
26 mathematical logic, type theory, arithmetic, syntax, semantics, memory  
27 organization, naming, and others. Figure 11 provides an overview of the types of  
28 interactions we have observed between biological model curators and a compiler  
29 architect while developing FlyClockbase.

30 Thus, we touched the tips of many icebergs and often needed to limit our scope. Much  
31 of this tension was caused by our desire to build a compiler that understands the  
32 imprecisions and complexities of biology and supports the efficient construction of high-  
33 quality *VBIRs*. We have pursued this goal by constructing such a *VBIR* and performing  
34 manually all tasks that we would like to delegate; this gave us the opportunity to reflect  
35 on the nature of the tasks and the quality of the outcome. This reduces the speed of  
36 both: compiler construction and *VBIR* construction, but simultaneously greatly increases  
37 quality. As argued by our analogy to aspects of population genetics theory, such  
38 increases in quality can be pivotal for the survival of a *VBIR* like FlyClockbase, which  
39 can easily be killed by small increases of inessential complexity. In this study, we  
40 provided a broad overview of this tandem work. We have removed from this paper all

1 aspects that can also stand on their own. For example, readers of this journal might be  
2 less interested in a formally complete description of the data structures that comprise  
3 Evolvix and the nuances of data models that contribute towards long-term stability. We  
4 endeavored to keep in the main text only those computational aspects that are most  
5 important for navigating the broader concepts used in FlyClockbase or that convey a  
6 general overview of our approach to reducing the cost of maintaining digital resources  
7 with the help of a compiler designed for this purpose. There is no reason why such a  
8 compiler could not be used by individual researchers collecting their own data, some of  
9 which they might want to share later. Therefore, our work presented here could also be  
10 seen from the following points of view.

11  
12 **View on gene expression variability.** The most direct purpose of our study is to  
13 use FlyClockbase to generate and analyze hypotheses about circadian clocks in *D.*  
14 *melanogaster*. We analyzed patterns of circadian variability across diverse independent  
15 studies of fruit flies, accumulating the largest number of time series for this purpose to  
16 date (to our knowledge). We have used the statistical power of FlyClockbase to detect  
17 consistent differences in the variance of peak times for the important clock proteins PER  
18 and TIM. This led us to hypothesize that these differences have mechanistic causes that  
19 are worth investigating with the methods of computational molecular systems biology  
20 (out of scope here). Our detailed analysis of variances in the peaks of PER and TIM  
21 and the potential causes for outliers (see above) suggests the removal of outliers by  
22 default using the method of Carling (2000) to focus more efficiently on estimating what  
23 typical clocks usually do (without suppressing natural variability in time series). Similarly,  
24 FlyClockbase can be used to compare the accuracy of different observation methods  
25 (Figure 8) and many other *Attributes*. An important contribution of FlyClockbase towards  
26 simulations of fly clock models of gene expression variability is its rich set of over 400  
27 wildtype time series that can be used - in principle - to improve estimates for circadian  
28 clock parameters. Such estimates might change the rather sobering observation that  
29 most clock modelers do not use most experimental observations when deciding on the  
30 parameter values for their simulations (see Figure 4). A study using state-of-the-art  
31 inference methods for obtaining the best possible clock model has been moved beyond  
32 the scope of this paper but could start immediately.

33  
34 **View on simplifying VBIRs development.** The broader purpose of our study is  
35 to develop, describe, and use FlyClockbase as a real-world testing ground for designing  
36 an extraordinarily reliable yet simple system for long-term backwards-compatible data  
37 integration. We also explored how to annotate, name, reference, identify, store, query,  
38 retrieve, and analyze the imperfect and complex biological data and its translation into  
39 well-defined computational concepts. Developing these capabilities is essential for the  
40 long-term mission of programming languages like Evolvix that aim to provide built-in  
41 support for biological research. This goal requires unusual amounts of direct user

1 feedback from experimental biologists to the language designers, as described  
2 elsewhere (LOEWE 2016). Since computers and their computations are ultimately  
3 abstract, software engineers have come to value the input of so called ‘domain experts’  
4 without whom it would be impossible to develop efficient and reliable non-trivial  
5 systems. Such feedback is easier to provide in engineering and other technical  
6 scenarios where domain experts and software engineers tend to speak a similar  
7 language. However, such a shared language does not usually exist in biology where the  
8 ‘domain experts’ are experimental biologists who often are not used to expressing their  
9 expertise in a form easily understood by software engineers. It is an important goal of  
10 Evolvix to fill that gap and enable the best experimental biologists to express their  
11 expertise in a form that is readily translatable into computable models. Simplifying the  
12 construction of VBIRs is an essential component of this larger goal and critically  
13 important for evolutionary systems biology (LOEWE 2016).  
14

15 **View on Evolutionary System Biology.** The ultimate long-term purpose of  
16 FlyClockbase is to substantially contribute towards implementing the vision of  
17 mechanistic simulations in evolutionary systems biology as detailed elsewhere (LOEWE  
18 2009; LOEWE 2012; LOEWE 2016). Evolutionary systems biology aims to quantify fitness  
19 landscapes by mapping genotypes (via realistic fitness causality networks) to  
20 phenotypes and ultimately fitness. Since circadian clocks have a large impact on  
21 fitness, their behavior is of direct evolutionary importance (BEAVER *et al.* 2002; BEAVER  
22 *et al.* 2003; DODD *et al.* 2005; LOEWE AND HILLSTON 2008; AKMAN *et al.* 2010; BEAVER *et al.*  
23 *et al.* 2010). Constructing a high-quality model of a circadian clock in *D. melanogaster*  
24 could thus provide the opportunity to explore many mutant options *in silico* (LOEWE AND  
25 HILLSTON 2008) and thus bring us closer to the goal of quantifying fitness landscapes of  
26 interest (LOEWE 2009; LOEWE 2012; LOEWE 2016). To enable this vision, myriads of  
27 models on the scale of FlyClockbase will need to be constructed, connected and  
28 analyzed both individually and in various combinations. Most of today’s tools do not  
29 manage imprecision with the high degree of precision that is needed for integrating  
30 models at such a scale. To address these problems, we need the VBIRs automation  
31 discussed above and other new approaches to biological model curation.  
32

33 **Biological model curation.** The substantial needs for biological model curation  
34 illustrated in this study highlight a challenge faced by biology as a discipline.  
35 Researchers have accumulated very large amounts of biological data that is currently  
36 scattered across the scientific literature in forms that are difficult to access efficiently (or  
37 become completely inaccessible as lab notebooks are being thrown out or primary data  
38 is lost from hard drives). In FlyClockbase we integrated scattered data from across the  
39 literature. The substantial amount of work involved forced us to acknowledge, that it is  
40 not possible to engage in the integration of biological information at this scale without a  
41 substantial investment of time. Even if VBIRs construction is eventually simplified to the

1 highest possible degree by the most user-friendly compiler and *VBIRs* construction  
2 environment imaginable, the need for model curation in biology will not become trivial.  
3 On the contrast, such a compiler could motivate a new generation of biologists to  
4 actually revisit and integrate data that has long been ignored, because using it without  
5 compiler support would have been too tedious. This possibility will likely boost interest in  
6 a currently unusual avenue to biological research that is not well represented in the  
7 biological job market of today.

8 *Status quo.* For a long time, most biology undergraduates have been aiming to  
9 work at the bench in a wet-lab. Biologists overly focused on wet-lab work might  
10 undervalue the importance of biological model curation by underestimating the  
11 intellectual efforts it requires. However, what use is experimental data if it remains  
12 inaccessible? While biological model curation does not generate new data *per se*, it  
13 makes existing experimental observations accessible in integrated forms. The resulting  
14 information repositories, such as GeneBank, are prime sources of data used by  
15 computational biologists. The rising importance of computational modeling and  
16 bioinformatics in biology is now recognized well enough so that students in these areas  
17 can readily self-identify and point to labs, role models and career paths. Such  
18 computational professions require substantial training in formal methods, quantitative  
19 approaches and computational tools – usually not easily understood by experimental  
20 biologists who dedicate their career to investigating a particular system in great detail.  
21 Conversely, many computational, mathematical, and other programming biologists  
22 struggle to develop enough dedication for a career committed to studying a single  
23 biological system. The time they take to develop their computational expertise takes  
24 away from the time they have to develop their biological intuitions to the level required  
25 for high-quality biological model curation.

26 *A growing avenue to biological research.* Work on biological model curation  
27 which was integral to obtaining the results we presented alerted us to a rising need for  
28 the integration of biological data. As shown by the new biological insights presented in  
29 this study, biological model curation is as essential to biological research as  
30 bioinformatics algorithm development, original lab observations, and field data  
31 collecting. It does not stand behind lab experiments or computational work in its  
32 potential for contributing new biological insights. The low entry bar to model curation  
33 should not be mistaken for a lacking ability to advance the cutting edge of science. Each  
34 major avenue of biological research has trivial activities that do not speak to its potential  
35 for biological innovation. Pipetting samples into tubes does not reflect the complexities  
36 of experimental biology. Defining the initial values for a few variables in a program does  
37 not reflect the potential for innovations from computational biology. Similarly, the simple  
38 activity of comparing a few numbers from a few studies in a spreadsheet does not  
39 reflect the importance of biological model curation for progress towards addressing  
40 grand scientific challenges. In our experience, in depth biological model curation for



1 non-trivial questions requires a substantial amount of attention that will not realistically  
2 leave much room for additional work on the side, whether in wet-lab or in computation.  
3 The FlyClockbase work present here demanded the undivided attention of several  
4 researchers and integrators. Model curation work is easy to scale up or down, but  
5 significant new findings still require dedicated resources – as everywhere in research.

6 *What it takes to do biological model curation.* While biological model curators are  
7 still rare, their work has more history than commonly known (see Introduction on  
8 biocurators). Biological model curators must have sufficient interests in the wet-lab work  
9 necessary for generating the observations they curate to know about typical pitfalls, but  
10 they typically do not work at the bench. They must be sufficiently aware of the strengths  
11 and weaknesses of relevant modeling approaches and extract the most relevant  
12 information from the scientific literature, but they do not need to be expert programmers.  
13 Most importantly, they need a passion for ‘their’ system to the point where they want to  
14 know everything about it, irrespective of the method used to observe it. This will enable  
15 them to accumulate enough expertise for learning about the strengths and weaknesses  
16 of different methods of observation and for developing an intuition about the quality of a  
17 given data set. Such expertise is essential for helping to improve the overall  
18 reproducibility of statistical processing pipelines by improving quality of relevant input  
19 data, as recently called for (LEEK AND PENG 2015).

20 *On the shoulders of giants.* We aimed to stand on the shoulders of giants in fly  
21 clock research. This would have been impossible without the biological contributions  
22 from the high-quality model curation work that resulted in FlyClockbase. To enable more  
23 biologists to stand on the shoulders of their giants we have been working towards  
24 capturing our experiences with FlyClockbase in the definitions of *VBIRs*. We expect that  
25 constructing a corresponding *VBIRs* compiler will greatly accelerate the integration of  
26 the biological expertise required to meet the grand challenges of our time. One of these  
27 is to understand the long causality chain that starts with the daily rhythms of core clocks  
28 and ends with detailed mechanisms for the changes in health and fitness caused by the  
29 daily rhythms of the thousands of genes under circadian control.

## Acknowledgements

We thank Jerry Yin, John Hogenesch and Chris Bradfield for stimulating discussions of circadian clocks, methods of how to observe them in mice and flies, and how to interpret aspects of these observations and of our findings. We thank John Yin, Millard Susman and Anthony D. Pietsch for many discussions on more general aspects of this work and numerous comments on earlier versions of this manuscript. We thank Cecilia Moog, Jocelyn Meyer, Sarah L. Northey, Ginger Ann Contreras, Coco Contreras, Kimberli Ward, and Martha Loewe for helping to refine some sections of the text, as well as reviewing BioBinary definitions and suggesting substantial relevant improvements.

We thank Alyssa Hotz, Claire Nusbaum, Devanie Tucker, Noah Waters, and Keegan Reilly for stimulating discussions of various aspects of circadian clocks and their importance and all other members of the Loewe Lab who have in various ways contributed to innumerable discussions of requirements for a programming language that can handle the uncertainties and complexities of biology.

We are very grateful to Ben Liblit, David Page, Ines Dutra, David Anderson, and Michael Ferris for numerous comments over the years on a wide range of technical, formal, and mathematical details that have shaped in several ways the design of FlyClockbase and/or aspects of analyses performed in this study.

We are particularly grateful to Seth A. Keel for setting up the initial Git repository of FlyClockbase and helping with numerous Git-troubles. Most importantly, he contributed critically to the stability of FlyClockbase by highlighting the flexibility-vs-performance trade-off in databases-vs-file-systems: he made us realize how databases usually compromise flexibility, long-term stability, and low maintenance costs in order to gain performance in searching for answers to prepared types of questions. In contrast, for research we need maximal flexibility, reliability, accessibility, recoverability – all at minimal complexity and costs. Seth showed that these traits are more important than faster answers to more restricted, recurrent questions, since question types in research are unpredictable.

**Funding.** We thank the Welton Family Foundation for an early grant to K.S. that helped to start this work, the National Science Foundation for NSF CAREER Award 1149123 to L.L. that supported most of this work, and the Wisconsin Institute for Discovery at the University of Wisconsin-Madison for general support. Any opinions, findings, and conclusions or recommendations expressed in this material reflect those of the corresponding author and do not necessarily reflect the views of NSF or other funders or contributors to this work.

## 1 **Author contributions**

2  
3 **Conception and design.** K.S. created, designed, developed, tested, and repeatedly  
4 improved most aspects of FlyClockbase, *PeakValleyTables*, and their initial statistical  
5 pilot analyses that indicated which results were interesting for our first analysis,  
6 eventually leading to the analyses presented here. K.S. was supported by J. Dr. and  
7 E.N. in many practical aspects, including substantial re-organizations of FlyClockbase;  
8 she was also supported by L.L. in theoretical, modeling, and various data layout design  
9 aspects, as well as in questions of computational modeling, and managing connections  
10 to Evolvix. After L.L. set the initial stage by formulating the overarching goal to work  
11 towards creating the best possible circadian clock model for *D. melanogaster*, K.S. took  
12 the idea and in several iterations developed the biological model in Fig. 1 which drove  
13 many biological aspects of FlyClockbase and of this paper; L.L. conceived the approach  
14 for investigating error rates and potential blind spots of poor reliability in FlyClockbase.

15 L.L. conceived, designed, and has been continually developing Evolvix, TabFS,  
16 POST, and various other concepts in Evolvix that also underpin FlyClockbase and  
17 governed its technology choices. In his design work he was substantially supported by  
18 K.S. who conducted countless usability reviews and provided numerous suggestions for  
19 improving, clarifying and simplifying many diverse aspects of Evolvix, TabFS, logic  
20 systems and operator precedence problems from a user's perspective. Her feedback  
21 included conceptual suggestions, architectural aspects of item-type-context interplays  
22 with BioBinaries to indicate TS analysis integrity, numerous ideas for syntax and name  
23 choices that improve the consistency and visual elegance of many important  
24 punctuation symbol choices for Evolvix, TabFS, and FlyClockbase. L.L. conceived and  
25 designed the overall strategy of mixing disciplines by combining in-depth molecular  
26 system biology model curation work integrating all expertise and observations about a  
27 system, with research relevant for compiler construction. The latter includes in-depth  
28 analyses of the limits of some formal logic systems and the practical aspects of  
29 developing an architecture that better supports biology by developing a readable syntax  
30 and naming-support for facilitating VBIR curation.

31 **Experiments and acquisition of data.** K.S. collected and organized all data  
32 (as described above, supported by J.Dr. and E.N.). J.Da wrote a script that greatly  
33 facilitated many early explorations by K.S. To measure human error rates, L.L.  
34 developed a strategy in close collaboration with K.S. and J.Dr., who both executed this  
35 strategy (with assistance from E.N.) by thoroughly searching for human errors that –  
36 despite all caution – had persisted into *Mod5* (resulting in *Mod6* after correction; see  
37 text).

38 **Analysis and interpretation of data.** Substantial statistical consulting and  
39 numerous very helpful discussions came from B.H. and J.Da. The initial exploratory  
40 statistical analysis was done by K.S. (with consulting support from B.H.). B.H. provided

1 an important independent statistical analysis that was instrumental in prioritizing  
2 questions while designing the final statistical analysis. L.L. independently developed  
3 and implemented the final statistical analysis performed by over 12K lines of R source  
4 code available as Supplemental Material with the input files used. L.L. collated the  
5 output with comments into a single PDF denoted as Supplemental Statistical Analysis in  
6 the text. B.H. also contributed towards various practical aspects of exploring the data  
7 and helped defining the approach that turned into the “linearization” of CZT discussed in  
8 this study; B.H.’s regular practical and statistical input has been extremely helpful for  
9 K.S. and L.L. by providing innumerable valuable pointers that helped navigate many  
10 complex decisions about how to best analyze the data presented. B.H. thereby  
11 substantially shaped the work and increased the overall statistical realism and rigor of  
12 this study. K.S. designed and implemented the workflow for increasingly refining the  
13 *PeakValleyTables*.

14 **Drafting of manuscript, revising content.** K.S. wrote the first draft of the whole  
15 paper, created Figures 1-6+9, substantially refined many sections (Introduction, all  
16 sections directly discussing biological parts, Materials and Methods, Results,  
17 Discussion) and provided detailed feedback on most parts written or revised by L.L.. In  
18 addition, K.S. helped adjust the overall paper structure and figure representations based  
19 on discussions with L.L.. K.S. created several items of Supplemental Material,  
20 summarizing various results in tables, and worked with L.L. to streamline the overall  
21 presentation of results in order to reduce complexity for readers.

22 L.L. wrote the sections describing the data model of FlyClockbase (including its  
23 Supplemental Materials and substantial revisions to the FlyClockbase overview Fig. 2).  
24 L.L. greatly expanded K.S.’s texts on statistics and modeling, as used in this study  
25 (robust statistics, see R script, Supplemental Statistical Materials; parameter estimation  
26 for solving inverse problems). LL substantially edited the presentation of the Results and  
27 Discussion, and added Figures 7,8,10,11, and Tables 2,8. L.L. motivated and greatly  
28 improved the error analysis within the limitations of this study. L.L. wrote all sections on  
29 biological model curators, and computational aspects that build links to VBIRs, TabFS,  
30 Evolvix, reproducibility, logic, compiler construction, the ‘DISCOVARCHY’ documentation  
31 style, and broader links to biological modeling and evolutionary systems biology. L.L.  
32 provided biological consulting thought-out this project.  
33

# FlyClockbase: Importance of Biological Model Curation for Analyzing Variability in the Circadian Clock of *Drosophila melanogaster* by Integrating Time Series from 25 Years of Research

Katherine S. Scheuer<sup>\*†</sup>, Bret Hanlon<sup>‡</sup>, Jerdon W. Dresel<sup>\*†</sup>, Erik D. Nolan<sup>\*†</sup>, John C. Davis<sup>‡</sup>, Laurence Loewe<sup>\*†</sup>

<sup>\*</sup>Systems Biology Theme, Wisconsin Institute for Discovery, <sup>†</sup>Laboratory of Genetics, <sup>‡</sup>Department of Statistics, University of Wisconsin-Madison

## Appendix: Supplemental Text

### Table of Contents

|                                                                                                                                                                                                     |            |
|-----------------------------------------------------------------------------------------------------------------------------------------------------------------------------------------------------|------------|
| <b>1. FlyClockbase design processes in more detail</b>                                                                                                                                              | <b>126</b> |
| FlyClockbase development is intertwined with Evolvix                                                                                                                                                | 126        |
| --- FlyClockbase and its challenges to programming languages                                                                                                                                        | 127        |
| --- Evolvix development follows a unique approach                                                                                                                                                   | 127        |
| --- Long-term goals of Evolvix                                                                                                                                                                      | 128        |
| --- How FlyClockbase helped Evolvix                                                                                                                                                                 | 128        |
| --- How Evolvix helped FlyClockbase                                                                                                                                                                 | 129        |
| --- Stabilizing Versioning                                                                                                                                                                          | ---        |
| --- Examples: QQv1, RRV1                                                                                                                                                                            | ---        |
| --- Why stabilizing versioning?                                                                                                                                                                     | 129        |
| --- Table P1                                                                                                                                                                                        | 130        |
| --- The role of TabFS in the stability of FlyClockbase                                                                                                                                              | ---        |
| --- How does stabilizing versioning benefit FlyClockbase?                                                                                                                                           | ---        |
| --- Types in FlyClockbase                                                                                                                                                                           | ---        |
| --- Test case for Evolvix                                                                                                                                                                           | ---        |
| --- Why not a conventional database?                                                                                                                                                                | 131        |
| --- Logic challenges posed by missing data                                                                                                                                                          | 132        |
| --- Table P2                                                                                                                                                                                        | 133        |
| --- Permissions, backups, and the reliability of data storage                                                                                                                                       | 134        |
| --- Challenges in logic                                                                                                                                                                             | ---        |
| --- Trade-offs: paper vs databases vs filesystems                                                                                                                                                   | ---        |
| --- Long-term stability in VBIRs data structures will enable new biology                                                                                                                            | 136        |
| --- Tombstone example                                                                                                                                                                               | 137        |
| <b>2. Human error analyses: approaches, challenges, efficiencies</b>                                                                                                                                | <b>138</b> |
| Finding capable curators                                                                                                                                                                            | 138        |
| --- Errors are inevitable                                                                                                                                                                           | 138        |
| --- Errors are hard to detect for humans                                                                                                                                                            | 139        |
| --- Human error analysis and prevention methods are difficult to develop                                                                                                                            | 139        |
| --- Error analysis could be amortized across resources by compilers                                                                                                                                 | 142        |
| --- Efficiencies of scale                                                                                                                                                                           | 142        |
| --- Tool development and funding strategy development are connected tasks                                                                                                                           | 143        |
| <b>3. DISCOVARCHY Documentation Style Questions for Coders</b>                                                                                                                                      | <b>144</b> |
| Source code as documentation                                                                                                                                                                        | 144        |
| --- Source code as electronic lab note book for <i>in silico</i> research                                                                                                                           | 144        |
| --- Trade-offs in code writing                                                                                                                                                                      | 144        |
| --- DISCOVARCHY in brief                                                                                                                                                                            | 145        |
| --- Table D1                                                                                                                                                                                        | 146        |
| <b>4. Example of an error a compiler could have caught by type checking: Effect of linearizing clock times on distributions of Peaks and Valleys</b>                                                | <b>147</b> |
| Recall Example Context                                                                                                                                                                              | 147        |
| --- Problem in principle                                                                                                                                                                            | 147        |
| --- Problem in practice                                                                                                                                                                             | 148        |
| --- Uninformative DZTs                                                                                                                                                                              | 148        |
| --- Detecting excessive noise                                                                                                                                                                       | 148        |
| --- Table S1                                                                                                                                                                                        | 149        |
| --- Solution by linearization                                                                                                                                                                       | 150        |
| --- How a simple VBIR compiler can help                                                                                                                                                             | 150        |
| --- How a more advanced VBIR compiler can help                                                                                                                                                      | 150        |
| --- Other examples                                                                                                                                                                                  | 150        |
| --- Compilers that directly assist in biological research                                                                                                                                           | 151        |
| --- Expected cost reductions                                                                                                                                                                        | 151        |
| <b>5. Literature cited in supplemental material</b>                                                                                                                                                 | <b>152</b> |
| <b>TABLE P1</b> The <i>StablizingZone</i> of the <i>Project Organization Stabilizing Tool</i> (POST) system is defined by the <i>StabilityCodes MM</i> to <i>TT</i> , presented by their BEST Names | 130        |
| <b>TABLE P2</b> The <i>BioBinary</i> data type for cases in biology that are less than clear-cut                                                                                                    | 133        |
| <b>TABLE D1</b> The DISCOVARCHY questions on documentation style help highlight source code that is hard to read and might offer ideas for improving it efficiently                                 | 146        |
| <b>TABLE S1</b> The impact of linearizing circadian time on summary statistics like the <i>Peak</i> (A) and <i>Valley</i> (B) traits of time series                                                 | 149        |

## 1. FlyClockbase design processes in detail

An overview of biological and data integrity aspects of FlyClockbase, as well as a description of relevant data types and their units is given in the Models section of the main text. Here we present practical ‘behind the scenes’ aspects of information management work. Although information management work is not “biological”, it is of substantial importance for the usability, reproducibility, and maintainability of FlyClockbase. Our paper stands by itself without these details. However, given the importance of reproducibility in computational biology; the enormous struggle to design systems that facilitate a desirable level of reproducibility over longer periods of time; as well as our interest in this topic, we decided to take the opportunity to reflect on some of the choices we made, and our subsequent experiences.

**FlyClockbase development is intertwined with Evolvix.** Many aspects of FlyClockbase are linked with our work on developing reliable general-purpose programming capabilities for Evolvix. Evolvix is a modeling language that aims to facilitate accurate modeling for investigating biological systems and to provide long-term backwards compatibility for computational biologists to build on each other’s work in a more direct way (reducing time on re-implementing models). A prototype of Evolvix is available for download at ( <http://evolvix.org> ). The prototype download efficiently simulates pure mass-action models described in a declarative programming paradigm, and efficiently collects the most important time series data points during a specified simulation run (thwarting the origin of potentially large simulation results datasets before they become difficult to handle). This Evolvix prototype has been used for simulating models in research (EHLERT AND LOEWE 2014). Our practical experiences with this prototype in the context of a more complex modeling study (EHLERT AND LOEWE 2014) demonstrated the need for adding general-purpose programming capabilities to further simplify the construction of many modeling scenarios (debugging across several different languages as done currently is not an efficient use of research time). To overcome these challenges, we are developing an extension for Evolvix that implements a general-purpose programming language, designed to simplify general programming as much as possible, in order to stay true to the original vision of Evolvix, i.e. to make accurate modeling easier. This effort turned out to be highly unusual and required us to develop a new approach to programming language design, which we described elsewhere as Flipped Programming Language Design Approach (LOEWE *et al.* 2017). Briefly, this approach ensures that unexperienced users of Evolvix can provide useful input in how the language is designed in order to ensure overall simplicity is maximized too, while experts work to maximize expressivity.

1           **FlyClockbase and its challenges to programming languages.** Many real-  
2 world modeling problems in biology share characteristics that simultaneously  
3 characterize corresponding general-purpose programming challenges. The biggest  
4 computational obstacles to efficient computation in biology might be in its unique mix of  
5 diversity, complexity, uncertainty and vastness. In combination, these efficiently  
6 frustrate many computational abstractions that work well for less intense combinations  
7 of these complicating traits. A particular challenge is often the unpredictability and  
8 subtleness of such problems and exceptions; thus, there is no substitute for covering  
9 ground “on the ground” by walking detail by detail through specific biological examples  
10 while paying particular attention to cognitive dissonances that indicate a poor fit  
11 between the biological realm and the realm of current programming approaches. When  
12 certain types of programming bugs are eventually observed repeatedly, a programming  
13 ecologist might take solace in the observation that continued sampling in complex  
14 ecosystems will eventually yield a finite count for the number of types in a species  
15 richness problem (DOPFER *et al.* 2008; ZHANG AND STERN 2009; MAGNUSSEN *et al.* 2010),  
16 even if that number is very large as in the case of bugs (GROVE AND STORK 2000;  
17 HAMILTON *et al.* 2010). FlyClockbase has provided us with the outstanding opportunity to  
18 observe at close range many instances that frustrate the efficient use of biological  
19 observations for computational purposes. Taken alone these issues are rarely large or  
20 complicated, but combined can be challenging (“glass of water” vs “tsunami”). This is a  
21 characteristic of scattered big data that often become relevant only in much larger  
22 datasets (to accumulate enough exceptions for triggering complexity problems). The  
23 data collected for FlyClockbase presented numerous challenges regarding the diversity  
24 and uncertainty of time series data. These challenges of FlyClockbase have inspired  
25 various important requirements for Evolvix development, aiming to simplify such work in  
26 the future (see Discussion of main text for some examples, but reporting most results  
27 would be beyond the scope of this study).

28  
29           **Evolvix development follows a unique approach.** The unique programming  
30 challenges of biology have inspired the rather unconventional Flipped Programming  
31 Language Design Approach for developing Evolvix (LOEWE *et al.* 2017). This design  
32 process for Evolvix is heavily front-loaded and emphasizes the coherent, user-friendly  
33 integration of functionally mature sets of features that are chosen with a view to long-  
34 term stability. The aim of these priorities is to reduce idiosyncrasies and confusion for  
35 users, as well as inessential complexity and costly busy-work for developers, especially  
36 on the long term. The slightly higher short-term development efforts required for  
37 facilitating the necessary review processes are negligible in comparison to the benefit of  
38 developing Evolvix in a way that generates a long-term backwards-compatible  
39 language.

1           **Long-term goals of Evolvix.** Evolvix aims to provide general-purpose  
2 programming capabilities designed by biologists for biologists to help with facing the  
3 complexities of biology. Given that inessential complexity is at the heart of many  
4 inefficiencies and problems in computational biology, it is mandatory for Evolvix to find  
5 the most efficient way of cutting as much programming complexity as possible.  
6 Efficiency will increase the ease of handling additional biological complexity. Architects  
7 of languages or compiler designs can only consciously address problems that they have  
8 noticed or that have been brought to their attention. Once such problems are openly  
9 visible, it is much easier to propose solutions. Once a solution has been proposed, it is  
10 much easier to critique it. The Flipped Programming Language Design approach used  
11 by Evolvix facilitates a communication line between a language architect that can still  
12 change the design of a language, and potential future users, who would otherwise just  
13 keep to themselves the many reasons that motivate them to classify a programming  
14 language as too complicated for them. Evolvix aims to break that cycle, where  
15 (otherwise clever) users prefer to not acquire computational skills that are well within  
16 their reach, simply because they are confused by some language-specific idiosyncrasy.  
17 To get passed this barrier to semantic reproducibility requires work towards debugging  
18 what has been termed the Code2Brain Interface (LOEWE *et al.* 2017).

19  
20           **How FlyClockbase helped Evolvix.** In programming language design, as  
21 elsewhere, problems that remain hidden rarely go away and accidentally solving them is  
22 unlikely. We have used this perspective to turn these problems into a treasure trove of  
23 inspiration for designing innovative Evolvix programming language features. Working  
24 through the fly clock time series data that we integrated into FlyClockbase has  
25 presented us with a rich set of subtleties, semi-regularities, exceptions, uncertainties,  
26 contradictions, and other imperfections of real-world biological data. The decision to  
27 face these difficulties has enabled the development of designs for general-purpose  
28 programming language features that fit biological research problems much more  
29 naturally than solutions developed in 'non-biological' general-purpose programming  
30 languages (e.g. BEST Names for handling synonyms as described elsewhere (LOEWE *et*  
31 *al.* 2017)). Many of the general results from our substantial engagement in this trans-  
32 disciplinary process remain beyond the scope of this study. However, the study that  
33 introduces FlyClockbase is the most natural place for presenting some important  
34 aspects of the process that helped us develop key concepts for representing the  
35 confusing complexity of biological data that we encountered in our work with  
36 FlyClockbase. An overview is described in Figure 11 of the main text and its respective  
37 comments. We have included illustrative examples of insight gained from this process  
38 below and in the Discussion.



1           **How Evolvix helped FlyClockbase.** Conversely, the intertwined development  
2 process has motivated the adoption by FlyClockbase of numerous approaches originally  
3 developed to meet Evolvix requirements. An unduly short list of examples include the  
4 BEST Names concept, (LOEWE AND KEEL 2014; LOEWE *et al.* 2016), the Project  
5 Organization Stabilizing Tool (POST) system (LOEWE *et al.* 2017), the insights we used  
6 to assign a special role to standard filesystems for storing data (which eventually  
7 stimulated the development of TabFS as described in the main text Discussion as the  
8 storage structure underpinning FlyClockbase), BioBinaries, and the stabilizing  
9 versioning system briefly described next.

10  
11           **Stabilizing Versioning.** To facilitate development, versioned variants of  
12 FlyClockbase are numbered according to the stabilizing versioning system developed  
13 for Evolvix and described as part of the “*StabilizingZone*” of the POST system (see  
14 online material of LOEWE *et al.* (2017)). The term “version variants” is meant to highlight  
15 the diversity of types of variants that might change an instance of FlyClockbase in the  
16 stabilizing versioning system that it uses. For example, let us consider the version  
17 variants of this document when initially submitted to reviewers, and at the moment of  
18 initial publication as peer-reviewed study.

19           *QQv1.* The version variant associated with this submission is *QQv1*. This is the  
20 Brief Evolvix way of pointing to the meaning of the *StabilityCode* for “*QualityQuest*” and  
21 indicate that a substantial milestone has been reached that is known in *QQ* as *Version 1*  
22 and is now waiting for evaluation by various types of reviewers (including usability-  
23 reviewers and subject-matter expert reviewers for all relevant disciplines). There might  
24 be many or few, small or big, new versions, releases, and/or patches on the *QQ* level.  
25 How many depends on the number necessary for incorporating the feedback that is  
26 necessary for taking the next (more public) step in a responsible manner.

27           *RRv1.* The version variant *RRv1* is associated with the first reviewed release that  
28 is intended for some productive use (albeit without particular stability guarantees yet).  
29 This is the Brief Evolvix way of saying “*ReviewedRelease*” and indicate that someone  
30 with the authority to release this variant has reviewed all pertinent issues and deemed  
31 the overall maturity to be sufficient for public release. For this study, this point will be  
32 reached, when FlyClockbase accompanies the final publication of this study in the form  
33 of a corresponding public release of FlyClockbase on Github.

34           *Why stabilizing versioning?* This versioned variant numbering system was  
35 selected to encourage responsible steps towards enabling long-term backwards  
36 compatibility for FlyClockbase and to enable it to be a *VBIRs*, i.e. a truly *Versioned*  
37 *Biological Information Resource* (vs being only a *BIRs*, where “Current” is the only well-  
38 defined state or versioning is incomplete). Stabilizing versioning alleviates the tension  
39 between repeated rounds of rigorous review as required for long-term stability and the  
40 flexibility to quickly experiment with risky ideas as required for innovation. Some of

1 these ideas have to be tried out before it is possible to reasonably decide what to do  
 2 with them (many of them should never appear in a system aiming for stability). The  
 3 concept of a *StablizingZone* has been developed to alleviate a similar tension in Evolvix.  
 4 It builds on the *StabilityCodes* that are part of the POST system and are shown in Table  
 5 P1.

8 **TABLE P1. The *StablizingZone* of the *Project Organization Stabilizing Tool* (POST)  
 9 system is defined by the *StabilityCodes* *MM* to *TT*, presented by their BEST Names.**

| Brief     | Explicit                | Summarizing Name                                                                                                             |
|-----------|-------------------------|------------------------------------------------------------------------------------------------------------------------------|
| <b>MM</b> | <i>MockupModel</i>      | MockupModel_UsedFor_RapidPrototyping_InformalLearning____<br>__ExpertimentsToBeThrownAway_StabilizingDesignNotCode           |
| <b>NN</b> | <i>NewNonfunctional</i> | NewNonfunctional_UsedFor_NotYetFunctioning_DeepFoundations____<br>__ForLargerStableDesigns_ThatDoNotYetWorkForUsers          |
| <b>OO</b> | <i>OperatesOften</i>    | OperatesOften_UsedFor_Systems_PartiallyWorkingForEndUsers____<br>__while_StillMissing_ImportantFeatures_ToBeImplemented      |
| <b>PP</b> | <i>PreProbing</i>       | PreProbing_UsedFor_Preparing_PeerReviewAndPublicProbing____<br>__by_PolishingExistingFeatures_UntilSubmissionFor_Questioning |
| <b>QQ</b> | <i>QualityQuest</i>     | QualityQuest_UsedFor_Questioning_AxiomsDataScienceAccuracy____<br>__RigorClarityUsability_InMany_ExpertBeginnerReviewRounds  |
| <b>RR</b> | <i>ReviewedRelease</i>  | ReviewedRelease_UsedFor_NewReleasesRecommended_by____<br>__QualityQuestEditors_after_AnsweringAllReviewerQuestions           |
| <b>SS</b> | <i>StableSource</i>     | StableSource_UsedFor_StunningSoftware_RunningInProduction____<br>__with_LongTermSuccess_and_VeryRareRevisionRequests         |
| <b>TT</b> | <i>TrustedTested</i>    | TrustedTested_UsedFor_Marking_VeryLongTermStableDesigns_in____<br>__WellUnderstoodDomains_AllowingBackwardsCompatibleGrowth  |

11 *Both have been developed for the general-purpose programming features of Evolvix with the*  
 12 *goal of facilitating the development of long-term backwards compatibility. More details have*  
 13 *been discussed as the Evolvix BEST Names concept was introduced (LOEWE et al. 2017).*

16 *The role of TabFS in the stability of FlyClockbase.* FlyClockbase depends on the  
 17 stability of its underpinning storage infrastructure. As argued below, we decided against  
 18 traditional databases, because the constant stream of upgrades easily imposes  
 19 prohibitive burdens of IT administration work on those biologists who are likely to initiate  
 20 and maintain *VBIRs*. To resolve this, FlyClockbase development has also been  
 21 intertwined with the development of what we call ‘TabFS’, an extremely thin and  
 22 transparent file system that sits on top of a standard file system. This study is not the  
 23 place to appropriately describe and define TabFS; suffice to say it is being designed to

1 have the abilities of a fully functional file system with additional features that simplify  
2 some work in computational biology. These features are combined with a priority on  
3 radical openness allowing the local user in the host operating system to change  
4 anything and everything (e.g. this allows a biological model curator to easily change the  
5 type system of a *VBIR*). These desirables of *TabFS* come at the price of having to deal  
6 with inconsistent states that are more likely to be caused by users in *TabFS* than in  
7 other file systems. Resolving this will require additional checks and redundancies to  
8 enable recovery of consistency when users generate errors. Thus, the biggest trade-off  
9 in this setup is a slower performance. However, a fundamentally important and  
10 conscious design decision for *TabFS* is to trade short-term performance for increased  
11 long-term durability. Practically, *TabFS* stores everything in tab-delimited tables of text  
12 stored in the folders of a standard file system. It can be thought of as an organized  
13 equivalent of Comma-Separated-Value (CSV) files, albeit with strict formal rules that  
14 enable compiler checks.

15 *How does stabilizing versioning benefit FlyClockbase?* The decision to buy into  
16 the stability of major standard file systems does not mean that problems of storage  
17 incompatibility cannot affect FlyClockbase. To efficiently organize FlyClockbase we  
18 need to abstract recurring themes, and these abstractions need to be developed, which  
19 takes time. FlyClockbase bundles these storage abstractions into TabFS; hence any  
20 changes in TabFS that are not backward compatible will threaten the data stored in  
21 FlyClockbase if not handled appropriately. This is where stabilizing versioning is  
22 expected to be extremely helpful: it indicates to users how reliable a potential upgrade is  
23 likely to be. It also indicates to developers and reviewers shared expectations about the  
24 quality of the code they write or read. Thus, proper versioning is essential for stability of  
25 FlyClockbase as a *VBIR*. Reporting more on our progress towards this goal is beyond  
26 the scope of this study.

27 *Types in FlyClockbase.* In addition to using TabFS, FlyClockbase has also been  
28 developing its own type system and content that requires coordinated changes and can  
29 hence benefit from versioning.

30 *Test case for Evolvix.* Without detracting from its biological focus, FlyClockbase  
31 provides an important real-world testing ground for developing approaches to enable  
32 long-term backwards compatibility in Evolvix(LOEWE *et al.* 2017) serving longer-term  
33 research goals in Evolutionary Systems Biology (LOEWE 2016).

34  
35 **Why not a conventional database?** FlyClockbase is designed at a time when  
36 data science is of growing importance for biomedical research (see (NIH *et al.* 2012)).  
37 We have considered the many virtues of diverse well-developed database management  
38 systems (from SQL to NoSQL to NewSQL). These guarantee consistency of data,  
39 simplify complex searches via special query languages, and increase speed of access

1 for growing amounts of data that is appropriately organized (e.g. (JURNEY 2013;  
2 MAHMOOD 2016)).

3 Unfortunately, these advantages usually come at a price that includes the hidden  
4 or deferred costs of:

- 5 (i) becoming increasingly dependent on a specific stack of software that is often  
6 growing in complexity,
- 7 (ii) complicating installation or transport across platforms,
- 8 (iii) becoming too difficult for non-specialists to tentatively add new data and  
9 datatypes,
- 10 (iv) complicating the migration from an old (often rigid) database schema to one with  
11 new features (and complexity, but usually equally fragile).

12 Combined with poor documentation and sloppy naming, such problems can easily  
13 degrade the semantic reproducibility (LOEWE *et al.* 2017) and, hence, the long-term  
14 usability of any data collection that builds on top of such tools. The Introduction of the  
15 main text discusses more aspects. As a result, pre-clinical biomedical research in the  
16 US has been estimated to invest about \$7Bn/yr in studies that were deemed to contain  
17 irreproducible data analysis or reporting (FREEDMAN *et al.* 2015). Such an environment  
18 is hardly conducive to efficient biology, computational or otherwise; as a consequence,  
19 the critical importance for reproducibility of research results has been recognized across  
20 many disciplines (DONOHO 2009; GOECKS *et al.* 2010; KARR *et al.* 2012; NIH *et al.* 2012;  
21 STODDEN *et al.* 2014; JAMES *et al.* 2015; KARR *et al.* 2015a; KARR *et al.* 2015b; KENALL *et al.*  
22 *et al.* 2015; POLDRACK AND POLINE 2015; STODDEN 2015; LOEWE 2016; LOEWE *et al.* 2017).  
23 As argued in the Discussion of the main text, simple text files have many desirable  
24 features. We decided to carefully build on those.

25  
26 **Logic challenges posed by missing data.** Another notorious difficulty in many  
27 “standard” databases is how to indicate the absence of particular data, which can be  
28 interpreted as different types of zero. The difference between “not available”, “not  
29 applicable” and various other types of “null” is widely recognized (ZANIOLO 1984;  
30 CANDAN *et al.* 1997; DE TRE *et al.* 2004; WARAPORN AND PORKAEW 2008; BOSC AND  
31 PIVERT 2010; HERNICH *et al.* 2011; THALHEIM AND SCHEWE 2011; HARTMANN AND LINK  
32 2012; LIFSCHITZ *et al.* 2012; MARTINEZ *et al.* 2013; MIRZA 2015), yet standard databases  
33 struggle to provide automated support beyond an unspecified, potentially ambiguous  
34 ‘NA’ (may stand for *NotAvailable*, *NotApplicable*, *NotAllowed*, ...). Further, they build  
35 on the Closed World Assumption (that all relevant data is always fully specified) and aim  
36 to represent everything in the stark true-false dichotomy of Boolean logic. Current  
37 research in logic has provided many examples for the crippling effects of such black-  
38 white limitations when confronted with a more nuanced world of color (SMITH 2008).  
39 These problems surface very quickly, when attempting to reconcile the crisp true-false  
40 dichotomies of a world of Boolean variables with biological observations with a certainty

1 that is less than clear-cut. To quickly allow for the identification of such biologically  
2 important cases without losing the advantages of the crisp semantics of Boolean logic,  
3 the following “OKScale” of four alternative states for a value of the type ‘BioBinary’ has  
4 been designed for Evolvix (see p.16, online material of (LOEWE *et al.* 2017)).  
5 FlyClockbase is adopting the *BioBinary* type to facilitate clearly marking the states  
6 described in Table P2.

7  
8 **TABLE P2. The *BioBinary* data type for cases in biology that are less than clear-cut.**

|    |            |                                                                                                                                                                                                                                                                                                                     |
|----|------------|---------------------------------------------------------------------------------------------------------------------------------------------------------------------------------------------------------------------------------------------------------------------------------------------------------------------|
| 9  |            |                                                                                                                                                                                                                                                                                                                     |
| 10 | <b>OK</b>  | Indicates the full agreement with a specified test that has been completely executed (equivalent to Boolean “true”);                                                                                                                                                                                                |
| 11 |            |                                                                                                                                                                                                                                                                                                                     |
| 12 | <b>KO</b>  | Indicates the full disagreement in all points with the specified test that has been completely executed (equivalent to Boolean “false”);                                                                                                                                                                            |
| 13 |            |                                                                                                                                                                                                                                                                                                                     |
| 14 | <b>OKO</b> | Indicates any intermediate between OK and KO for cases that are well known not to be clear cut, albeit without storing any other information, such as a probability that could specify the distance from OK or KO (it is up to users to determine what they do want to store); No Boolean equivalent exist for OKO; |
| 15 |            |                                                                                                                                                                                                                                                                                                                     |
| 16 |            |                                                                                                                                                                                                                                                                                                                     |
| 17 |            |                                                                                                                                                                                                                                                                                                                     |
| 18 | <b>MIS</b> | Indicates any mistake or problem that made it impossible to reach any of the other three conclusions, irrespective of the nature of this problem (it is up to users to decide how much about the potentially infinite complexities of such problems they wish to store; no Boolean equivalent exists for MIS).      |
| 19 |            |                                                                                                                                                                                                                                                                                                                     |
| 20 |            |                                                                                                                                                                                                                                                                                                                     |
| 21 |            |                                                                                                                                                                                                                                                                                                                     |
| 22 |            |                                                                                                                                                                                                                                                                                                                     |

23 *This new data type has been designed for efficiently reasoning about biological observations*  
24 *with a certainty that is neither perfectly true nor false. More details elsewhere (LOEWE et al.*  
25 *2017). It is equivalent to parliamentary voting systems that have long distinguished the*  
26 *‘Yes’ (OK) and ‘No’ (KO) votes from ‘Abstain’ (OKO) and ‘NotPresent’ (MIS).*

27  
28  
29 The basic features of the *BioBinary* do not eliminate the need to find a way of  
30 representing the infinitely many more detailed types of OKO, KO, and MIS, which might  
31 be used to represent details about the infinitely many stages of incompleteness, zero,  
32 null-hypotheses, or potential mistakes and contradictions that could be encountered  
33 when analyzing biological data. It is extremely difficult to anticipate which of the more  
34 nuanced types of information beyond these four will be encountered while actually  
35 analyzing biological observations. Maximizing the flexibility for describing such  
36 exceptions, while providing useful guidelines to educate FlyClockbase users about  
37 important subtleties, improves the quality of the reported data and reduces the  
38 frequency of misleadingly strong statements that overstate their claim. Such statement  
39 can easily be generated by if the logic formalism of a system does not allow recording a  
40 weaker statement. Our most important goal is to have a logical formalism that is neither  
41 overly restrictive (which would prohibit the representation of certain observations), nor  
42 as unstructured and flexible as a blank page (which would make it very difficult to

1 conduct any useful logic analyses). We found it helpful to work with lists of controlled  
2 vocabularies and only to add freeform comments for special cases, which could  
3 eventually add to controlled vocabulary if repetitive. The decisions about which columns  
4 are controlled, which are free, which entries make it into a controlled vocabulary list, and  
5 when a free-form comment will be extracted in order to populate a new column, and  
6 many more such decisions strongly depend on the subject matter and the content of a  
7 VBIRs. We therefore decided that biological model curators would need the full ability to  
8 change any of the types in a VBIRs as they see fit to represent the observations they  
9 curate. Since VBIRs are Versioned, all these decisions can and should be properly  
10 reviewed to improve consistency.

11  
12 **Permissions, backups and the reliability of data storage.** Beginners  
13 and experts, all have full administrative (“root”) access to almost every aspect in  
14 FlyClockbase. The very open approach of FlyClockbase raises the question of  
15 how to guarantee the integrity of its use. While in theory a user can compromise  
16 FlyClockbase quickly, the chances of such an event with lasting consequences are  
17 much smaller than these unrestricted settings might suggest. When viewed in context:

- 18  
19 (i) few users of FlyClockbase *aim* to compromise their installation; moderate hiding of  
20 critical infrastructure or clear indications warning about the potential of breaking  
21 sensitive parts is usually sufficient to prevent mistakes; the latest working release of  
22 FlyClockbase is never in danger if a release manager keeps backups;  
23  
24 (ii) distributed development of FlyClockbase poses the same challenges as all  
25 distributed information processing, namely, the merge/cache-invalidation/naming  
26 problem. It can be solved in principle by distributed version control systems (like Git),  
27 or by using cloud synchronized folders in combination with strictly following a version  
28 variant naming scheme to prevent loss of data (see Fig. 1BC in LOEWE *et al.* 2017).  
29 We tested both approaches (Git and cloud-style automatic synchronization). We  
30 found both to be less inviting than they could be if a set of reliable scripts were to  
31 automate repetitive tasks in a way that reliably excludes loss of data (and without  
32 adding to the cognitive load of the user).

33  
34 While it may seem that widely known database technologies are free from these  
35 problems, they in-turn come with independent problems of their own. For example,  
36 FlyClockbase may give ordinary users too much administrative power. Many other  
37 databases resolve this problem by locking down access. Yet, in turn these databases  
38 require special expertise or permissions for exploring new avenues of recording a richer  
39 spectrum of biologically relevant difficulties with contradictory scattered big data. Even  
40 experienced database architects may use natural language for the very early initial

1 stages of database development. We aim to give model curators the ability to do exactly  
2 this ‘*in situ*’.

3       *On some challenges in logic work.* Capturing details important for describing  
4 biological observations in a consistent way can be challenging research in logic  
5 formalisms, because of the vagueness of some biological data (SMITH 2008). Most  
6 biological model curators are not likely to have the training in formal methods to define  
7 the new formalisms that remain at the end of this research. As argued above and in  
8 Figure 11 (main text), curators can still contribute a lot by providing examples and  
9 detailed expertise on how to interpret their various challenging aspects, which is  
10 impossible for non-biologists to do. To facilitate the practical work necessary for  
11 enabling this type of discussion, a number of smaller problems need to be resolved:

- 12  
13 • *Form of recording.* Any persistent record of observations in logic needs to encode  
14 the observations of principles or bugs in some formal way that can also be read by  
15 other persons. In a world of infinite resources, it does not matter how these  
16 observations are encoded, as long as their semantics is completely reproducible  
17 (LOEWE *et al.* 2017). However, for most biologists engaged with model curation,  
18 patience with logic formalisms is a limited resource. Approaches used in practice for  
19 communicating logic problems ought to be as simple to use as possible. A blank  
20 page or an arbitrary text description work well, written or spoken; it is the task of a  
21 person with more understanding in formalisms to translate such fragmented insights  
22 into a more coherent formal picture. Additional burdens, such as transforming  
23 descriptions of logic problems into a particular logic formalism, are probably  
24 counterproductive. Many curators might be tempted to indicate that they have  
25 nothing to report, simply to avoid the difficult task to re-encode their observations,  
26 e.g. in a relational database formalism. While certainly possible, it does not mean  
27 that this is advisable; in principle, these problems could also be expressed in the  
28 form of Gödel numbers (GÖDEL 1931), but this would only add huge amounts of  
29 inessential complexity. Thus, the simplest possible storage medium is probably best.  
30
- 31 • *Durability of recording.* For the sake of argument, let us assume that there was a  
32 very straightforward way of recording all such statements in a database. Then such  
33 work can become unnecessarily complicated, if the database system requires  
34 frequent complex updates that are triggered by external database developers aiming  
35 to deliver ongoing improvements like new features, security, performance or more. If  
36 such upgrading becomes excessive, paper and pencil might become increasingly  
37 attractive.  
38
- 39 • *Size and complexity.* Documenting progress in debugging or developing logic does  
40 not usually generate large amounts of data, but the few cases that are there are

1 important and complicated. Hence, an uncomplicated, distraction free storage  
2 medium is desirable.

- 3
- 4 • *Speed of copying.* For efficient communication, it is desirable to find a storage  
5 medium that is easily copied through communication channels. This is where non-  
6 electronic approaches have their greatest drawbacks.

7

8 *Trade-offs.* To solve these challenges in a practical way, let us consider the following  
9 advantages and disadvantages of paper, file systems and databases.

- 10
- 11 • *Paper*, for example, does not suddenly refuse to operate as expected because it  
12 needs an upgrade – a plus for stability. Its durability is legendary and generally  
13 measured on the scale of centuries. However, the speed of writing, reading, and  
14 copying is slow and error prone.
  - 15
  - 16 • *Dedicated databases*, relational or otherwise, when designed for fast retrieval of  
17 certain types of answers are hard to beat in speed for that particular application. Yet  
18 that speed will drop to zero, if the latest essential upgrade is not applied and all data  
19 in the system becomes inaccessible (see tombstone example below).
  - 20
  - 21 • *Filesystems* in contrast, offer the best of both worlds: almost the reliability of paper  
22 (assuming that there will always be electricity and hardware that enables access to  
23 the file system and perpetuation of backups); almost the flexibility of paper  
24 (assuming corresponding types of files); almost the speed of databases (assuming  
25 the data is organized so that the speed of reading or writing approaches the limit  
26 supported by the hardware). The big question for file systems is whether a way of  
27 organization can be found that keeps all important data appropriately organized.
- 28

29 ***Long-term stability in VBIRs data structures will enable new biology.***

30 *We suggest that a compiler could help curators to efficiently maintain long-term stable*  
31 *VBIRs in consistent formal states so that these VBIRs can be used as foundations,*  
32 *which are solid enough to build on them for the long term. This will eventually make it*  
33 *feasible to construct more advanced VBIRs on top of more basic ones.*

34 *If foundational VBIRs describe causal genotypic or environmental information*  
35 *and more advanced VBIRs describe more consequential molecular, cellular,*  
36 *physiological, or other phenotypic information, then VBIRs enable the implementation of*  
37 *a full fitness-causality network that maps the genotypes and environments of an*  
38 *organism to its phenotypes in a transparent mechanistic way that connects well to the*  
39 *latest updates of all data that is available – if all relevant data and data structures are*  
40 *well curated and appropriately versioned for stability.*



1  
2 **Tombstone example.** Here we illustrate with an example the very real long-term  
3 danger to biological research posed by database technology that is not long-term  
4 backwards compatible. The TIGR Gene Indices were first published at  
5 <http://www.tigr.org/tdb/tgi> (QUACKENBUSH *et al.* 2000). After their introduction, the TIGR  
6 Gene Index databases quickly became a well-known tool for biological discovery (LEE  
7 AND QUACKENBUSH 2003; PERTEA *et al.* 2003; LEE *et al.* 2005). They are now no longer  
8 available online as documented on their tombstone:  
9

10 <http://compbio.dfci.harvard.edu/tgi/>

11  
12 In case the tombstone itself disappears eventually, here we paraphrase its 2017 report  
13 of some vital statistics about TGI:  
14

15 *Supported by NIH, DOE and NSF 1998-2010, the relevant*  
16 *TGI papers were cited >2000 times. When the tombstone*  
17 *was written the TGI website still received >7 million hits per*  
18 *year (assuming the actual number on the tombstone was a*  
19 *typo). When funding ended in 2010, the team continued to*  
20 *maintain the website, but the hardware and software*  
21 *required behind the scenes began to fail. Effective July 15,*  
22 *2014 operations had to be suspended, because there were*  
23 *not sufficient funds to maintain it properly. The software*  
24 *powering TGI (DFCI Gene Indices Software Tools) and the*  
25 *data sets it used was ‘fossilized’ to*

26 *<ftp://occams.dfci.harvard.edu/pub/bio/tgi/software/>*

27 *<ftp://occams.dfci.harvard.edu/pub/bio/tgi/data/>.*

28  
29 It is not up to us to comment on TGI’s science or its funding history. Neither is  
30 relevant to our main point: extinction is a real risk for VBIRs and fossilization to some  
31 archive is not a real life-saver. The haphazard nature of funding for biological  
32 information repositories is well known and a significant source of concern (EMBER *et al.*  
33 2013). Less obvious is the impact of a stable VBIRs compiler for TGI. Imagine the  
34 software behind TGI would use appropriate abstractions and thus not fail. Imagine it  
35 could continue to operate reliably on different hardware, including that of users. Imagine  
36 the software would be long-term backwards compatible. Imagine it could help many  
37 biologists to contribute to curation of TGI. Imagine a whole community would annotate,  
38 improve, deprecate, or otherwise edit various aspects of TGI in order to preserve its  
39 benefits or point to improved successor tools. Imagine other biological research codes  
40 had built on long-term stable parts of TGI and could all continue to operate simply by  
41 copying TGI to a local hard drive. Would that make a difference?

## 2. Human error analyses: approaches, challenges, efficiencies

Problems with tracing the identity, availability, accuracy, precision, and reliability of data have been the topic of numerous investigations and recently received renewed attention in the context of assessing potential uses of scattered biological data sources and big data (e.g. see (REASON AND MYCIELSKA 1982; REASON 1990; REASON AND HOBBS 2003; GOLDSTON 2008; GITELMAN 2013; GRIMES *et al.* 2013; MCCALLUM 2013; REASON 2013; BLANKENBERG *et al.* 2014; REASON 2015)).

FlyClockbase presented us with an excellent opportunity to explore numerous issues related to the quality, accuracy, and reliability of complex collections of information that aim to integrate data that can be incomplete, uncertain, contradictory, erroneous and scattered across a wide range of sources. Much expertise in biology currently exists in such less-than-well-defined states that can be difficult or impossible to process computationally. Thus, we expect that some of the lessons we learned while compiling FlyClockbase become increasingly important as biologists expand their use of computational resources throughout their work. While it is beyond the scope of this study to appropriately review all corresponding challenges and potential solutions we encountered, a few observations of common challenges of general interest are reviewed next.

**Finding capable curators.** Compiling nontrivial resources of biological information requires a substantial and sustained effort from researchers who bring a certain set of skills. They need to (i) possess the background expertise necessary to understand the importance of the information they compile, and (ii) be motivated to collect information from various scattered representations into a single, less idiosyncratic representation that constitutes the new resource. New resource creation, as listed above, usually requires more effort than experimental or computational biologists are willing to dedicate. This might require researchers with a special interest in high-quality information collection regarding the respective system. Like airplane pilots, curators will need training in appropriate error handling.

**Errors are inevitable.** A broad body of research has shown that human errors in any non-trivial data processing are inevitable and that error rates increase with the complexity of a task (REASON 1990; REASON AND HOBBS 2003; REASON 2013; REASON 2015; PANKO 2016). This is true in particular for the use of spreadsheet software (PANKO 1998; PANKO AND SPRAGUE 1998; PANKO AND AURIGEMMA 2010), for which rates for various types of error have been measured. Our own results confirm that some errors (e.g. simpler data entry) occur with lower rates than other more complex errors, that stem from occasionally forgetting non-obvious steps in a complicated procedure (see

1 Table 4). We can confirm previous findings, showing that even the most motivated  
2 researchers with substantial training and background expertise will inevitably err when  
3 transferring information in complicated scenarios where many complex details could go  
4 awry (see also (LESGOLD *et al.* 1988; GALLETTA *et al.* 1993; GALLETTA *et al.* 1997; PANKO  
5 AND SPRAGUE 1998)).

6  
7 **Errors are hard to detect for humans.** Proofreading software is well known for  
8 not catching all spelling errors. It is also well known, that not all humans catch all  
9 spelling errors. Yet spelling errors are the simplest errors. All others are more difficult to  
10 detect in comparison. Errors in logic are particularly difficult; however, the worst  
11 category of errors are errors of omission (PANKO 2016).

12 Given the various complex operations required for integrating and analyzing data  
13 with FlyClockbase, FlyClockbase has competitive error rates, as found when re-visiting  
14 parts of the database (see Table 5). However, manually extracting even simple time  
15 series traits (e.g. peak-valley times) has proven more error prone than we expected.  
16 The complexity of traits can rise substantially as increasing numbers of important  
17 conditions and special cases need to be observed for extracting a valid trait. Eventually  
18 complex decisions, when integrating less-than-perfectly fitting new observations into  
19 biological information resources, might easily generate very complex error scenarios.  
20 This is mainly because such work requires many decisions about which types in the  
21 data and in a *VBIR* are functionally equivalent and when effective differences are large  
22 enough to justify the introduction of new categories. The complexity of such offline  
23 decisions could rival the complexity (after preparation and training) of online decisions in  
24 mission-critical scenarios that have been analyzed elsewhere, from cardiac surgery  
25 (CARTHEY *et al.* 2001; REASON 2005) to space flight (NASA *et al.* 2011; HOOEY *et al.*  
26 2014). In many of these scenarios, human failure is catastrophic; correspondingly  
27 sophisticated human reliability analysis methods have been developed to ensure that  
28 human error is exceedingly unlikely - if not preventable, in principle (REASON 1990;  
29 NASA *et al.* 2001-09-30; REASON AND HOBBS 2003; NASA *et al.* 2006-07; NASA *et al.*  
30 2011; REASON 2013; REASON 2015).

31  
32 **Human error analysis and prevention methods are difficult to develop.**

33 Many of the methods that are appropriate for investigating and preventing human error  
34 in contexts such as space flight, nuclear power plants, or aviation (NASA *et al.* 2006-07;  
35 NASA *et al.* 2011) are much too complex and costly for applying them towards  
36 improving the reliability of biological information resources like FlyClockbase. This is  
37 true even if the complexity of problems generated by resources such as FlyClockbase  
38 rivals or exceeds the complexity of navigating a space ship.

1           The huge immediate and catastrophic danger and costs of errors in navigating  
2 space ships and running nuclear power stations make it obvious and easy to justify the  
3 large effort required for in-depth analyses of human errors. In contrast, adding data to  
4 *VBIRs* seems harmless; it certainly is if only the immediate impact is considered, and it  
5 probably also is on the long term. However, in biomedical research there is a small  
6 chance that errors in *VBIRs* are not as harmless as they seem if they remain  
7 uncorrected. The following scenario is difficult to exclude categorically in bio-medical  
8 research. Imagine that some researcher integrates data into some medically relevant  
9 *VBIR* and makes an unnoticed error that remains in that *VBIR* for a long time and even  
10 replicates across repositories. If that error prevents the discovery an important new  
11 medical cure by leading a researcher to the wrong conclusions, then cost and risk  
12 calculations are no longer trivial.

13  
14           It is not clear how to resolve this problem. If each *VBIR* produced its own error  
15 analyses, costs would quickly spiral out of control and few resources would remain for  
16 actual biological research.

17  
18           Error analyses require a substantial level of biological expertise, yet are  
19 perceived as ‘tedious’ and ‘non-biological’ (by experimentalists) or ‘non-automatable’ (by  
20 computationally oriented biologists). Thus, recruiting experts for such error analyses can  
21 be exceedingly difficult or prohibitive, despite their importance for modern biology. The  
22 following potential ‘solutions’ are also likely to be counter-productive on the long term:

23  
24 (i) *Omitting error analyses.* While cost-effective during the initial stages of compiling a  
25 new resource, ignoring the potential for errors by not engaging in error analyses will  
26 result in a growing number of databases with questionable quality. Whenever  
27 databases have been analyzed, some rate of errors has been found (e.g. (JONES *et al.* 2007;  
28 HUTCHINS *et al.* 2010; WEIL *et al.* 2015)). It should not usually require open  
29 letters or other drastic measures (e.g. (DRAKE *et al.* 2008; ALLISON *et al.* 2016)) to  
30 possibly get errors corrected. The current state of software tools makes post-  
31 publication changes very difficult and most databases do not offer an easy way to  
32 submit proposed changes for review and efficient inclusion by administrators. While  
33 this explains the reluctance to update the latest available information, it is not  
34 conducive to advancing the integrity of scientific data. If no resolution to this error  
35 crisis can be found on the long-term, the resulting loss of quality will lead to a loss of  
36 reliability, reproducibility, and ultimately to a loss of trust in ‘data-based’ results.  
37 These costs are not immediately obvious to the authors of a new resource, but they  
38 will eventually manifest somewhere in the scientific community, either as  
39 irreproducible results, misguided research directions, or unnecessary ‘confusion-tax’  
40 for the users of a resource.

1  
2 (ii) *Automating database operations.* Some types of errors are greatly reduced by the  
3 use of automated database technology (e.g. leveraging SQL to keep indices up to  
4 date and reduce redundancy,). This is particularly effective for types of errors that  
5 occur in large numbers, thus making it easy to automate detection.

6 *Heterogeneity.* However, the highly heterogeneous nature of many advanced  
7 biological information resources can easily generate as many potentially relevant  
8 exceptions as entries. Relevant exceptions not addressed by the built-in logic of a  
9 database management system are at high-risk of causing errors, since errors by  
10 omission (of a special condition) are particularly difficult to detect (e.g. see  
11 discussions of *BioBinary*).

12 Such errors can be even more difficult to detect in automated systems, if they are  
13 not already detected automatically. Automation might tempt researchers to become  
14 over-reliant on computational results they no longer understand (especially if  
15 implemented by non-biological experts). The substantial computer science literature  
16 on compiler construction demonstrates that the use of automation via software does  
17 not protect against the innumerable types of errors that can be added to source code  
18 and can corrupt results (if not caught by a compiler; see (PARSONS 1992; AHO 2007;  
19 COOPER 2012; GRUNE 2012)). This suggests the following interesting conclusion:

20 *Automation trades some human errors for others.* For example, inconsistency  
21 errors that often occur in data that is entered manually are avoided by automation  
22 through programming; get programming can easily generate inconsistencies of its  
23 own that humans would not produce. Since about 2% - 5% of all lines of source  
24 code have been estimated to contain some errors (PANKO 2016), it is far from  
25 obvious how automatically handling the many special cases in resources like  
26 FlyClockbase can make additional analyses of various human errors superfluous.

27  
28 (iii) *No retrospective meta-analyses.* Not engaging with data analyses that trigger the  
29 need for error analyses robs biology of important perspectives. This would be  
30 equivalent to a call for stopping such otherwise non-controversial biological  
31 research. The impact on integrative work and relevant modeling efforts could be  
32 devastating. Hence, this options is not attractive.

33  
34 While currently no ideal solutions exist, raised awareness of the problem is likely to  
35 eventually contribute to the development of appropriate solutions. As argued above in  
36 the context of compiler design: seeing the problem in the first place is often the most  
37 difficult step. Maybe compilers could also help by automating many tedious aspects of  
38 these error analyses.

1           **Error analyses could be amortized across resources by compilers.** As  
2 argued above, developing appropriate error analyses for a single *VBIR* is not feasible.  
3 However, our experience with developing FlyClockbase suggests that a substantial  
4 number of essential tasks are recurrent and of comparable complexity across the  
5 development of a groups of *VBIRs*. Examples include the need for handling missing  
6 data, inapplicable data, imprecise ranges (rather than precise values), heterogeneous  
7 method descriptions, comparisons of wild types to mutants, and many other aspects of  
8 biological interest. Thus:

9  
10           *The most efficient solution to improving the quality of VBIRs without*  
11 *exploding costs is to develop an automated compiler that can*  
12 *automatically test for all known and formally described cases of*  
13 *errors and supports a programming language that integrates biology*  
14 *expertise to simplify the description of test cases by biologists.*

15  
16 Programmers frequently say that it is important to use the right tool for a given  
17 programming task, yet no such tool exists for the compilation of complex *biological*  
18 datasets. We will not repeat here the substantial number of reasons why such a  
19 language would be helpful and why current (non-biological) programming languages are  
20 insufficient (see Online Material and additional reasons discussed in (LOEWE *et al.*  
21 2017)).

22  
23           **Efficiencies of scale.** In the long term, it would be more cost efficient to  
24 construct a compiler that can read in all tables of FlyClockbase (or other *VBIRs*) and  
25 produce a report of all inconsistencies and errors that require human attention (as well  
26 as produce tables with all requested search results). Thus, certain types of errors would  
27 be detected automatically. Error detection modules and other solutions would be  
28 implemented only once and would simultaneously improve the reliability of all *VBIRs*  
29 construction efforts.

30           For those who wonder why we did not directly implement such a compiler, we  
31 would like to point out that - as so often is the case in computational biology - the overall  
32 time for obtaining a given biological result by manual 'compilation' is usually much  
33 shorter than the time it would take to implement a corresponding compiler. This certainly  
34 was the case here. For example, compiling the time series data of wildtype flies and  
35 checking the integrity of PER and TIM data to reasonable reliability was completed  
36 *much* faster manually, then if we had attempted to automate it by constructing a  
37 compiler for this. This cost calculation changes very quickly if large amounts of  
38 integration work are anticipated over long amounts of time in FlyClockbase or other  
39 *VBIRs*. There seems to be little debate over the need for curating biological data,

1 especially as it keeps growing (BOURNE AND MCENTYRE 2006; BURKHARDT *et al.* 2006;  
2 SALIMI AND VITA 2006; HOWE *et al.* 2008; BURGE *et al.* 2012).

3  
4 **Tool development and funding strategy development are connected tasks.**

5 Some development of tools beyond the scope of a single project already started,  
6 addressing the large amount of text mining done by biocurators (WEI *et al.* 2013; RAK *et al.*  
7 *et al.* 2014; SINGHAL *et al.* 2016). However, developing clear and successful funding  
8 strategies has remained a challenge (EMBER *et al.* 2013; ORCHARD AND HERMJAKOB  
9 2015; RODRIGUEZ-ESTEBAN 2015; REISER *et al.* 2016). The inefficiencies of present-day  
10 curation work in biology are substantial and might be sufficient to convince most funders  
11 to invest elsewhere. Our experiences have shown that many of these inefficiencies  
12 could be alleviated in principle by appropriately constructed tools. By today's standards  
13 it was unimaginably laborious to sequence a few genes in 1977, or a single human  
14 genome in 2001 (SANGER *et al.* 1977a; SANGER *et al.* 1977b; LANDER *et al.* 2001;  
15 VENTER *et al.* 2001; HAYDEN 2014; SHERIDAN 2014; TELENTI *et al.* 2016). Given the lack  
16 of appropriate tools, the lack of funding for corresponding work might be less surprising.  
17 Funding for sequencing human genomes in 1977 was negligible, if not \$0.

### 3. DISCOVARCHY Documentation Style Questions for Coders

The attitude of some programmers towards documentation can be summarized as:

***The source code is the documentation.***

Indeed, the agile approach to software development tries to avoid documentation, which can be costly to write, and is constantly out of date for fast developing code bases unless it is maintained with a large amount of effort (e.g. see comments in (HENRY 2013)). As a corollary, one might conclude that documenting scientific research code is a waste of time, since by definition such code is moving fast<sup>1</sup>. Unfortunately, such practice results in semantic irreproducibility (LOEWE *et al.* 2017), which hampers research (FREEDMAN *et al.* 2015). On the other extreme, again, it is neither reasonable nor efficient to demand that all research codes are refactored and documented excessively. For the most part, research codes are indeed only used very few times.

**Source code as electronic lab note book for *in silico* research.** For example, consider the highly specialized *R*-script, which was written especially for this study and that might be seen as a 'unique research application'. It is likely to serve only the purpose of re-running the analyses of our study, facilitating computational reproducibility of our study's results. While writing that code, there was no mandate to use best practices for software engineering – unless it would help get the job done faster or more reliably. Hence, no refactoring for longer-term use was done for increasing the quality of the source code.

**Trade-offs in code writing.** Good writing usually requires multiple rounds of revision and similarly, good code requires substantial refactoring. Depending on the occasion, this may be effort well spent, or time wasted. Our supplementary code for this study lives in this tension, and so do many other research computing codes written for specific unique analyses. How can such code be made more readable in order to help other researchers benefit from the work of the authors, and not waste their time on inessential complexities? This question is at the heart of semantic reproducibility (LOEWE *et al.* 2017). Table D1 introduces the DISCOVARCHY questions on documentation style. The acronym DISCOVARCHY highlights typical problem areas that can sometimes easily be improved once awareness increases. The acronym is on purpose designed to illustrate the many transitions small and large that are between worst and best practice. Some of the distinguishing characteristics are easy to change while programming, but prohibitively costly later (e.g. choosing summarizing variable names). On other occasions, it is prohibitively costly to refactor a whole code base

---

<sup>1</sup> It is important to distinguish such fast-moving research code from other, more mature scientific code that implements important algorithms which have become important research tools and are thus expected to behave reliably.



1 merely to make it easier to understand. Such cost-quality related tensions highlighted by  
2 DISCOVARCHY are linked to a fundamental trade-off faced by every innovator aiming to  
3 produce features reproducible by others. The trade-off forces numerous choices  
4 between the following ideals:  
5

- 6 • *Reproducibility* (much time for tests and documenting, little time for new features);
  - 7 • *New features* (little time for tests and documenting, much time for new features).
- 8

9 Every scientist needs to navigate the contrast between these ideals that is particularly  
10 sharp in research, where the goal is to make innovative new discoveries, while enabling  
11 others also to reproduce these innovations. The same tensions exist for software  
12 developers and programmers, only that reproducibility comes with a human and a  
13 machine aspect. For machines, reproducibility is the repeated execution on machines;  
14 this links the diversity of machines included in this claim directly to the cost of  
15 reproducibility. The human aspect of reproducibility implies that a human being other  
16 than the developer can read and understand the code correctly, an ability defined by the  
17 quality of the Code2Brain interfaces involved (LOEWE *et al.* 2017). As with machines,  
18 producing something that is more widely understood is usually more expensive. Much of  
19 the work needed for improving clarity and documentation of research codes could be  
20 delegated to a compiler that can easily translate between Brief Names preferred by  
21 developers and more verbose alternatives more easily understood by newcomers. The  
22 Evolvix BEST Names concept has been developed in order to facilitate such translation  
23 (LOEWE AND KEEL 2014; LOEWE 2016; LOEWE *et al.* 2016; LOEWE *et al.* 2017).  
24 Documenting code has a long history (KNUTH AND LEVY 1994) and requires more  
25 attention than this study can offer here.  
26

27 **DISCOVARCHY in brief.** The documentation style in Table D1 is based on the  
28 notion that awareness can allow researchers to exploit unique coding time opportunities  
29 for writing inexpensive imperfect comments that nevertheless greatly increase the real-  
30 world readability of their code. The DISCOVARCHY acronym highlights strategies that  
31 allow code writers to easily reduce common challenges to code readers. Briefly,

32 **Describing Design** beats *deduction*,  
33 **Info Included** beats *inference*,  
34 **Source Simplicity** beats *secrecy*,  
35 **Code Clarity** beats *complexity*,  
36 **Offline-Online Overview Offers** beat *online odysseys*,  
37 **Vetted Variables** beat *vagueness*,  
38 **Argued Axioms** beat *arbitrary assumptions*,  
39 **Relevant Restraints** beat *random restrictions*,  
40 **Collected Comments** beat *cancelled comments*, and  
41 **Your Yield** from using this code should not cost *years* of learning about it.  
42

1 **TABLE D1: The DISCOVARCHY Documentation Style raises awareness for causes that**  
 2 **make source code hard to read and offers efficient strategies for improving it.**

| Brief Names | <b>Coder centric view</b><br>Quicker to produce,<br>Costlier to consume | <i>discovercy</i> vs <b>DISCOVARCHY</b>                                                                                                                                                                                                 | <b>Reader centric view</b><br>Costlier to produce,<br>Quicker to consume | Brief Names |
|-------------|-------------------------------------------------------------------------|-----------------------------------------------------------------------------------------------------------------------------------------------------------------------------------------------------------------------------------------|--------------------------------------------------------------------------|-------------|
|             | <b>Reader Challenges</b>                                                | <b>Questions for Coders &amp; Comments</b>                                                                                                                                                                                              | <b>Coder Challenges</b>                                                  |             |
| <b>d</b>    | <i>documentation derivable by deduction and decoding</i>                | Does documentation help coders, readers, or neither? Ideal reader support is often too costly; but brief notes on higher design decisions in broken English (lacking time or writing skills) are usually extremely helpful.             | <b>Documentation D Describing Design Decisions</b>                       |             |
| <b>i</b>    | <i>inference</i>                                                        | If <i>source code is the documentation</i> , it should have relevant info included, not force reader inference of the coder's state of mind.                                                                                            | <b>Info I Included</b>                                                   |             |
| <b>s</b>    | <i>secrecy</i>                                                          | How much rare expertise is assumed? Are advanced coding tricks explained & marked?                                                                                                                                                      | <b>Source S Simplicity</b>                                               |             |
| <b>c</b>    | <i>complexity</i>                                                       | Complexity is easy to write, hard to read. Clarity, simplicity is hard to write, easy to read. Hard work: removing inessential complexity, without removing essential functionality.                                                    | <b>Code C Clarity</b>                                                    |             |
| <b>o</b>    | <i>online odysseys overwhelming outsiders</i>                           | Does code offer offline 'code-catchups' and online links to key background overviews, reducing reader overwhelm? Or are endless online odysseys mandatory for outsiders?                                                                | <b>Offline-Online O Overview Offers</b>                                  |             |
| <b>v</b>    | <i>vagueness</i>                                                        | Is the meaning of variables and functions tested & obvious from explicit or summarizing names? Using copy & paste, are names long enough to exclude random reuse of "x" etc?                                                            | <b>Vetted V Variables</b>                                                |             |
| <b>a</b>    | <i>arbitrary assumptions</i>                                            | Different solutions build on different assumed axioms. Are they explicitly argued for?                                                                                                                                                  | <b>Argued A Axioms</b>                                                   |             |
| <b>r</b>    | <i>random restrictions, reasons removed, rarely refactored</i>          | Are restraints relevant or restrictions random and in need of refactoring? Are reasons recorded or relevant results removed?                                                                                                            | <b>Relevant Restraints, R Recording Rare and Regular Reasons</b>         |             |
| <b>c</b>    | <i>cancelled comments</i>                                               | We like complete, clear comments over chaos & contradictions, but few can write a book. Do not cancel comments, but time-stamp collect them to help others follow. Mark older 'mixed quality' texts as 'retired' until the next update. | <b>Collected C Comments</b>                                              |             |
| <b>y</b>    | <i>years go quickly learning many poorly written codes bases</i>        | Understanding confusing code can quickly become prohibitive. Reading clear code is learning from a teacher. What will you write? What will you see if you re-read in 10 years?                                                          | <b>Your Y Yield</b>                                                      |             |

3 *Properties of poor code ('discovercy') are on a continuum with those of great code ('DISCOVARCHY').*  
 4 *Questions can help coders quickly add imperfect comments that save the day for their readers.*

#### 4. Example of an error a compiler could have caught by type checking: Effect of linearizing clock times on distributions of *Peaks* and *Valleys*

Please see Methods in the main text for motivating the linearization of times and for details on how it works. To illustrate the effect in the context of real data analysis, we selected types of mRNA and protein from FlyClockbase that are affected to varying degrees. Their observed peak and valley times are in Table S1, which compares their respective *ObsRaw* (non-linearized) and *ObsMod* (linearized) times.

**Recall Example Context.** For observing the impact of linearizing time, we remember that the time measurements in *ObsRaw TimeSeries* belong to the time type *DailyZT*, or *DZT*. If this information about types is understood by a compiler, then the compiler will know that such time measurements are recorded in time units of decimalized *Hours* and that they are reset to *0h* at the dawn of each day, which will reoccur every *24h* and increase a separate day counter by +1. If we ignore the day counter as usually done in circadian biology research, then *DZT* is a cyclical time type, which simultaneously is also a cyclical real number type. In contrast, all *ObsMod TimeSeries* are measured in linear time without resets, as defined by *ContinuousZT*, or *CZT*. A compiler that understands this type information will know how to convert *CZT* to *DZT* and back (by adjusting the additional number of days that have occurred; see main text). If the compiler understands the assumptions required for computing valid summary statistics, it can check if those assumptions are met.

For example, using the well-known equations for inferring the mean of a Normal distribution requires that all values exist on a linear real number line, before attempting to calculate averages. Using values of a fundamentally different type (e.g. with the value 'MyText') would result in a compiler error ("Cannot use 'MyText' when averaging"). For time measurements of type *CZT*, the decision is easy, because the definition  $0 < CZT \leq \text{infinity}$  can never generate cyclical time. For *DZT* time types, the decision is not as easy, because definitions like  $0 < DZT \leq 24h$  do not imply the end of time once the *24h* mark has passed. Flies, clocks and the rest of the world simply move on and will generate new data points. A sloppy *DZT* implementation will ignore the day-counter and act as if controlled by a time-loop – albeit with no effect on the linear time experienced by flies. The logical contradiction between the existence of a time-loop as assumed by such programs absence of such a time-loop in real life does not always matter. For example, if comparing only events from a *single* day, nothing can go wrong. However, some time series in FlyClockbase are longer than *24h*, which can generate profound confusion, as explained next.

**Problem in principle.** To illustrate the problem, let us consider an artificial dataset of *DZT* peak times for which a mean of *23h* has been inferred for the first day and where the observed min and max has been *22.1h* and *23.9h*, respectively. Despite

1 a circular number type, calculating a mean of  $23h$  is appropriate; no data is included  
2 from another day; hence, all times are effectively linear. Let us assume that the next  
3 peak added occurs 90 minutes after  $23h$ . If measured in *CZT*, this new peak would add  
4  $24.5h$  to an expected mean of  $23h$ ; the time remains linear and the mean remains valid.  
5 But expressed as *DZT*, this new peak would appear as a big outlier at  $0.5h$  in simplistic  
6 comparisons with a mean of  $23h$  (which implicitly drop a day). This type mismatch  
7 would misrepresent a peak of  $+1.5h$  after  $23h$  as  $-22.5h$ , an erroneously large distance  
8 with the wrong sign. Such errors will bias inferred means in the wrong direction and  
9 greatly inflate inferred variances, possibly obscuring genuine biological signals. If  
10 undetected, these errors may substantially bias biological conclusions at unspecified  
11 cost to both reproducibility and biology.

12  
13 **Problem in practice.** Initially we were not aware of these logical subtleties in  
14 handling different types of time. Calculating averages and variances requires a linear  
15 scale, a condition that is *completely* met out-of-the-box for all *Peak* or *Valley* times of  
16 some core clock components reported in Table S1. In these cases, time-linearizing  
17 does not affect summary statistics, since all observations already belong to the same  
18 day (e.g. TIM Protein *Peak*,  $18.41 \pm 2.54h$ ). However, if some observations belong to  
19 the previous or next day, a change in summary statistics can be observed (e.g. PER  
20 protein *Peak: Raw*  $16.77 \pm 5.48$  to *Mod*  $19.51 \pm 3.40 h SD$ ; see also the other average  
21 values in bold). To interpret SDs, it is instructive to consider random times of a day.

22  
23 **Uninformative DZTs.** As reported in the main text,  $SD > 6h$  is on the order of  
24 the  $SD$  of a uniform distribution across the day (deterministic 1h intervals from 0 to  $24h$   
25 result in  $SD \pm 7.36h$  around  $12h$  and drawing 1,000 corresponding uniformly distributed  
26 values does not fundamentally change the results ( $SDs$ : 6.81, 6.92, 7.02  $h$ ). Informal  
27 tests reducing the sample size to 20 presented a similar picture, albeit with substantially  
28 more noise (as we would expect for sample sizes comparable to the number of time  
29 series for a component in FlyClockbase).

30  
31 **Detecting excessive noise.** We can use the random *DZT* results to detect some  
32 cases, where a clock signal is known to exist, but measurement or data handling  
33 problems have obscured the signal dramatically (so it looks like random noise). Indeed,  
34 Table S1 presents such cases. Peaks of Raw *clk* mRNA ( $SD \pm 8.59h$ ), PER protein ( $SD$   
35  $\pm 5.99h$ ), and *per* mRNA valley ( $SD \pm 6.22h$ ) all show this problem, but there are also  
36 enough other cases to clearly demonstrate that not all time series are affected.

1 **TABLE S1. The impact of linearizing circadian time on summary statistics like**  
 2 **the *Peak (A)* and *Valley (B)* traits of time series.**  
 3

| <b>A</b>           |           | Peak<br>Median |        |      |       | Peak<br>Avg ± SD |        |        |        |           |
|--------------------|-----------|----------------|--------|------|-------|------------------|--------|--------|--------|-----------|
| Clock<br>Component | $n_{Raw}$ | Raw            | Mod    | Mod  | Mod   | Raw              | Mod    | Mod    | Mod    | $n_{Maj}$ |
|                    | $n_{Mod}$ | Circ           | Linear | Maj  | Odd   | Circ             | Linear | Maj    | Odd    | $n_{Odd}$ |
| clk mRNA           | 12        | 6.00           | 3.56   | 3.56 | 5.03  | <b>8.79</b>      | 2.79   | 3.56   | 3.02   | 4         |
|                    | 12        |                |        |      |       | <b>± 8.59</b>    | ± 3.16 | ± 1.12 | ± 3.73 | 8         |
| per mRNA           | 88        | 14.9           | 14.9   | 15.0 | 12.35 | 14.62            | 14.64  | 14.72  | 14.48  | 68        |
|                    | 88        |                |        |      |       | ± 1.68           | ± 1.65 | ± 1.01 | ± 2.87 | 22        |
| tim mRNA           | 48        | 14.83          | 14.83  | 15.0 | 12.0  | 14.67            | 14.54  | 14.85  | 14.14  | 30        |
|                    | 48        |                |        |      |       | ± 2.09           | ± 1.92 | ± 0.98 | ± 2.66 | 22        |
| PER protein        | 36        | 18.93          | 19.0   | 19.0 | 16.87 | <b>16.61</b>     | 17.72  | 18.61  | 19.71  | 30        |
|                    | 36        |                |        |      |       | <b>± 5.99</b>    | ± 4.79 | ± 2.10 | ± 5.90 | 10        |
| TIM protein        | 39        | 19.0           | 19.0   | 19.0 | 19.0  | 18.03            | 18.65  | 18.50  | 18.65  | 35        |
|                    | 39        |                |        |      |       | ± 3.50           | ± 2.83 | ± 1.35 | ± 4.29 | 11        |

  

| <b>B</b>           |           | Valley<br>Median |        |       |       | Valley<br>Avg ± SD |        |        |        |           |
|--------------------|-----------|------------------|--------|-------|-------|--------------------|--------|--------|--------|-----------|
| Clock<br>Component | $n_{Raw}$ | Raw              | Mod    | Mod   | Mod   | Raw                | Mod    | Mod    | Mod    | $n_{Maj}$ |
|                    | $n_{Mod}$ | Circ             | Linear | Maj   | Odd   | Circ               | Linear | Maj    | Odd    | $n_{Odd}$ |
| clk mRNA           | 30        | 14.97            | 14.97  | 14.97 | 14.50 | 14.33              | 14.33  | 14.58  | 14.15  | 17        |
|                    | 30        |                  |        |       |       | ± 1.67             | ± 1.67 | ± 0.69 | ± 2.12 | 17        |
| per mRNA           | 24        | 5.0              | 4.5    | 5.0   | 4.75  | <b>6.61</b>        | 3.61   | 4.20   | 3.65   | 20        |
|                    | 24        |                  |        |       |       | <b>± 6.22</b>      | ± 2.60 | ± 1.36 | ± 3.40 | 10        |
| tim mRNA           | 21        | 5.0              | 5.0    | 5.0   | 5.0   | 4.86               | 4.86   | 5.13   | 4.84   | 18        |
|                    | 21        |                  |        |       |       | ± 1.52             | ± 1.52 | ± 0.81 | ± 1.37 | 11        |
| PER protein        | 47        | 9.0              | 9.0    | 8.68  | 12.0  | 9.01               | 9.27   | 8.68   | 10.08  | 32        |
|                    | 47        |                  |        |       |       | ± 2.17             | ± 2.10 | ± 0.92 | ± 3.06 | 15        |
| TIM protein        | 36        | 4.0              | 4.0    | 4.0   | 10    | 6.19               | 6.19   | 4.83   | 9.66   | 29        |
|                    | 36        |                  |        |       |       | ± 3.26             | ± 3.26 | ± 1.51 | ± 3.98 | 10        |

4  
 5  
 6 *Bold values indicate suspiciously high SD suggestive of excessive noise. ObsRaw are in*  
 7 *circular time and not yet linearized; ObsMod are in linearized time. Mod refers to data from the*  
 8 *Mod6 PeakValleyTables; see main text Figure 3. To compare summary statistics of distributions*  
 9 *that mostly come from usual or extreme values, statistics are also calculated for Maj (Majority)*  
 10 *or Odd values. The counts of these values are given by  $n_{Maj}$  or  $n_{Odd}$  for usual majority or odd*  
 11 *extreme values; these were collected from the middle of ObsMod or from its margins,*  
 12 *respectively. For further explanations see text above. This table also draws on summary*  
 13 *statistics of Odd6 to show the increased variability of odd values. The other results in this table*  
 14 *are from a comparative TS tables analysis completed on 2016-08-16 for Obs Raw, Mod, and*  
 15 *Maj. No outliers were removed for calculating Raw, Mod, or Odd. The number of Obs included*  
 16 *is given by  $n_{Raw}$ ,  $n_{Mod}$ ,  $n_{Maj}$ , and  $n_{Odd}$ , for Raw, Mod, Maj, and Odd, respectively. For related*  
 17 *analyses see also Table 4 in the main text, as well as Table 6, Table 7, Figure 6, Figure 7, and*  
 18 *parts of the Supplemental Statistical Analysis.*

1           **Solution by linearization.** Close inspection indicated the problem (see above).  
2 We used these insights to devise a linearization procedure. The manual effort required  
3 for detecting the problem in the first place and then developing a solution consumed  
4 substantial amounts of research time. Other researchers will have to retrace or re-invent  
5 our work at substantial cost if they aim to avoid this problem. If a solution could be made  
6 available in the form of a compiler, then others could use and build on our results with  
7 almost no effort.

8  
9           **How a simple VBIR compiler can help.** Compilers can easily detect type-  
10 mismatches such as “DZT” vs “CZT” and plainly refuse any operations that require any  
11 mix of types. While this would mean that our data could not be analyzed with automated  
12 help, it would also guarantee that the root problem of type mismatch is brought to the  
13 attention of researchers.

14  
15           **How a more advanced VBIR compiler can help.** Sophistication beyond plain  
16 checks of type labels requires dedicated code addressing specific problem using  
17 domain specific biological expertise. For example, a *VBIR* compiler with definitions for a  
18 well-developed type system for circadian time series analysis could automatically check  
19 for potential *DZT* vs *CZT* confusion when calculating statistics beyond day 1, while  
20 allowing day 1 to be calculated if all data points are indeed from that day. Such a  
21 compiler would use a test for matching types to deduce the implicit drop of days from  
22 inspecting the type mismatch in combination with the actual data available at days  
23 beyond the first and explore remaining safe options. If user-friendly enough, it would  
24 create an understandable error diagnosis and alert the biological model curator in  
25 charge. If intelligent enough, such a compiler will offer a list of potential solutions from  
26 which the biologist in charge can choose efficiently how to address this problem and  
27 newcomers could request additional information. If analyses could only be performed by  
28 lucky accident (because *this* dataset allowed it, but others might not), then this compiler  
29 could produce a warning to that effect, so curators can anticipate potential problems as  
30 new data arrives.

31  
32           **Other examples.** It would be easy to create a long and detailed list of cases  
33 where appropriate support by a compiler could have speeded up our work with  
34 FlyClockbase. Examples include the lack of support for expressing ranges or three-  
35 point-estimates for parameter values or measurements with substantial uncertainty, the  
36 lack of warnings when spreadsheet parsing or calculating algorithms come across  
37 values of the wrong type, the lack of appropriate number systems that guarantee correct  
38 handling of cyclical and linear numbers and many more.

1  
2  
3  
4  
5  
6  
7  
8  
9  
10  
11  
12  
13  
14  
15  
16  
17  
18  
19  
20  
21  
22

**Compilers that directly assist in biological research.** A sufficiently advanced compiler would be like a helpful assistant<sup>2</sup>, finding errors like needles in haystacks of potential problems, cutting debugging time, and preventing untold additional problems on the way. Such a compiler will be useful to the degree that it can provide diagnoses and abstractions for detailed and difficult challenges. These challenges need to be solved first by a human, who can then build/teach a compiler how to solve the problem.

**Expected cost reductions.** Once the compiler will then be able to routinely perform the corresponding work the cost savings for *VBIR* development and teaching become substantial (the compiler can easily point to additional resources and more as demonstrated by the integrated help function of the *R* statistical programming language. If statistics has its language in *R*, why does biology not have its own language? The efficiencies gained would allow the scientists of today to enable the next generation of scientists tomorrow to get much faster to stand on the shoulders of giants. The compiler would be like an aerial cableway, which gets others faster to a place of uncluttered overviews.

---

<sup>2</sup> See <http://elm-lang.org/blog/compilers-as-assistants> for an exposition of what it might mean if compilers actually operated as assistants. This problem is inextricably linked to questions of syntax design. For example, see the importance of operator priorities [Razali et al., 2015, Operators and Precedence in Programming Languages.] and parsing which impacts the flexibility and quality of error messages that a compiler can produce [see Grune & Jacobs, 2008, *Parsing techniques: a practical guide*. Springer, New York.]

1  
2  
3  
4  
5  
6  
7  
8  
9  
10  
11  
12  
13  
14  
15  
16  
17  
18  
19  
20  
21  
22  
23  
24  
25  
26  
27  
28  
29  
30  
31  
32  
33  
34  
35  
36  
37  
38  
39  
40  
41  
42  
43  
44  
45  
46  
47  
48

## LITERATURE CITED IN SUPPLEMENTAL MATERIAL

- Aho, A. V. L., Monica S.; Sethi, Ravi; Ullman, Jeffrey D., 2007 *Compilers: Principles, Techniques, and Tools*. Pearson Education, Boston, MA.
- Allison, D. B., A. W. Brown, B. J. George and K. A. Kaiser, 2016 Reproducibility: A tragedy of errors. *Nature* 530: 27-29.
- Blankenberg, D., J. E. Johnson, J. Taylor, A. Nekrutenko and G. Team, 2014 Wrangling Galaxy's reference data. *Bioinformatics* 30: 1917-1919.
- Bosc, P., and O. Pivert, 2010 Modeling and Querying Uncertain Relational Databases: A Survey of Approaches Based on the Possible Worlds Semantics. *International Journal of Uncertainty Fuzziness and Knowledge-Based Systems* 18: 565-603.
- Bourne, P. E., and J. McEntyre, 2006 Biocurators: Contributors to the world of science. *Plos Computational Biology* 2: 1185-1185.
- Burge, S., T. K. Attwood, A. Bateman, T. Z. Berardini, M. Cherry *et al.*, 2012 Biocurators and Biocuration: surveying the 21st century challenges. *Database-the Journal of Biological Databases and Curation*.
- Burkhardt, K., B. Schneider and J. Ory, 2006 A biocurator perspective: Annotation at the research collaboratory for structural bioinformatics protein data bank. *Plos Computational Biology* 2: 1186-1189.
- Candan, K. S., J. Grant and V. S. Subrahmanian, 1997 A unified treatment of null values using constraints. *Information Sciences* 98: 99-156.
- Carthey, J., M. R. de Leval and J. T. Reason, 2001 The human factor in cardiac surgery: errors and near misses in a high technology medical domain. *Ann Thorac Surg* 72: 300-305.
- Cooper, K. D. T., Linda, 2012 *Engineering A Compiler*. Morgan Kaufmann, Burlington, MA.
- de Tre, G., R. de Caluwe and H. Prade, 2004 Null values revisited in prospect of data integration. *Semantics of a Networked World: Semantics for Grid Databases* 3226: 79-90.
- Donoho, D. M., Arian; Rahman, Inam; Shahram, Morteza; Stodden, Victoria, 2009 15 Years of Reproducible Research in Computational Harmonic Analysis. *Computing in Science and Engineering* 2009: 8-18.
- Dopfer, D., W. Buist, Y. Soyer, M. A. Munoz, R. N. Zadoks *et al.*, 2008 Assessing genetic heterogeneity within bacterial species isolated from gastrointestinal and environmental samples: How many isolates does it take? *Applied and Environmental Microbiology* 74: 3490-3496.
- Drake, V. J., B. Frei and L. M. Bouley, 2008 An error in the US Department of Agriculture nutrient database results in vitamin A values that are 6 times too high. *Am J Clin Nutr* 87: 1067-1068; author reply 1068-1069.
- Ehlert, K., and L. Loewe, 2014 Lazy Updating of hubs can enable more realistic models by speeding up stochastic simulations. *J Chem Phys* 141: 204109.
- Ember, C., R. Hanisch, G. Alter, H. Berman, M. Hedstrom *et al.*, 2013 Sustaining Domain Repositories for Digital Data: A White Paper, pp. [http://datacommunity.icpsr.umich.edu/sites/default/files/WhitePaper\\_ICPSR\\_SDRDD\\_121113.pdf](http://datacommunity.icpsr.umich.edu/sites/default/files/WhitePaper_ICPSR_SDRDD_121113.pdf) in *Workshop on Sustaining Domain Repositories for Digital Data, June 24-25, 2013*, ICPSR, University of Michigan, Alfred P. Sloan Foundation.
- Freedman, L. P., I. M. Cockburn and T. S. Simcoe, 2015 The economics of reproducibility in preclinical research. *PLoS Biol* 13: e1002165.



- 1 Galletta, D. F., D. Abraham, M. El Louadi, W. Lekse, Y. A. Pollalis *et al.*, 1993 An Empirical  
2 Study of Spreadsheet Error Performance. *Journal of Accounting, Management, and*  
3 *Information Technology* 3: 79-95.
- 4 Galletta, D. F., K. S. Hartzel, S. Johnson and J. L. Joseph, 1997 Spreadsheet Presentation and  
5 Error Detection: An Experimental Journal. *Journal of Management Information Systems*  
6 13: 45-63.
- 7 Gitelman, L., 2013 *"Raw data" is an oxymoron*. The MIT Press, Cambridge, Massachusetts ;  
8 London, England.
- 9 Gödel, K., 1931 Über formal unentscheidbare Sätze der Principia Mathematica und verwandter  
10 Systeme, I. *Monatshefte für Mathematik und Physik* 38: 173–198.
- 11 Goecks, J., A. Nekrutenko, J. Taylor and T. Galaxy, 2010 Galaxy: a comprehensive approach  
12 for supporting accessible, reproducible, and transparent computational research in the  
13 life sciences. *Genome Biol* 11: R86.
- 14 Goldston, D., 2008 Big data: Data wrangling. *Nature* 455: 15-15.
- 15 Grimes, M. L., W. J. Lee, L. Van der Maaten and P. Shannon, 2013 Wrangling  
16 Phosphoproteomic Data to Elucidate Cancer Signaling Pathways. *Plos One* 8.
- 17 Grove, S. J., and N. E. Stork, 2000 An inordinate fondness for beetles. *Invertebrate Taxonomy*  
18 14: 733-739.
- 19 Grune, D., and C. J. H. Jacobs, 2008 *Parsing techniques : a practical guide*. Springer, New  
20 York.
- 21 Grune, D. e. a., 2012 *Modern Compiler Design*. Springer Science, New York, NY.
- 22 Hamilton, A. J., Y. Basset, K. K. Benke, P. S. Grimbacher, S. E. Miller *et al.*, 2010 Quantifying  
23 Uncertainty in Estimation of Tropical Arthropod Species Richness. *American Naturalist*  
24 176: 90-95.
- 25 Hartmann, S., and S. Link, 2012 The Implication Problem of Data Dependencies over SQL  
26 Table Definitions: Axiomatic, Algorithmic and Logical Characterizations. *Acm*  
27 *Transactions on Database Systems* 37.
- 28 Hayden, E. C., 2014 Technology: The \$1,000 genome. *Nature* 507: 294-295.
- 29 Henry, P. L., 2013 "Ultimately, the source code is the documentation for developers" quoted in:  
30 "Lessons from the Agile trenches: The ups and downs of Agile development".  
31 [ibm.com/developerWorks: http://www.ibm.com/developerworks/library/a-agiletrenches/a-](http://www.ibm.com/developerWorks/library/a-agiletrenches/a-agiletrenches-pdf.pdf)  
32 [agiletrenches-pdf.pdf](http://www.ibm.com/developerWorks/library/a-agiletrenches/a-agiletrenches-pdf.pdf).
- 33 Hernich, A., L. Libkin and N. Schweikardt, 2011 Closed World Data Exchange. *Acm*  
34 *Transactions on Database Systems* 36.
- 35 Hooey, B. L., M. Aurisicchio, R. Bracewell and D. C. Foyle, 2014 Evidence-Based Error  
36 Analysis: Supporting the Design of Error-Tolerant Systems. *Human-Computer*  
37 *Interaction: Applications and Services*, Pt Iii 8512: 401-412.
- 38 Howe, D., M. Costanzo, P. Fey, T. Gojobori, L. Hannick *et al.*, 2008 Big data: The future of  
39 biocuration. *Nature* 455: 47-50.
- 40 Hutchins, L. N., Y. Ding, J. P. Szatkiewicz, R. Von Smith, H. Yang *et al.*, 2010 CGDSNPdb: a  
41 database resource for error-checked and imputed mouse SNPs. *Database (Oxford)*  
42 2010: baq008.
- 43 James, D., N. Wilkins-Diehr, V. Stodden, D. Colbry, C. Rosales *et al.*, 2015 Standing Together  
44 for Reproducibility in Large-Scale Computing: Report on reproducibility@XSEDE, pp.  
45 <http://arxiv.org/abs/1412.5557> in *Arxiv: Distributed, Parallel, and Cluster Computing*  
46 *(cs.DC)*, arXiv:1412.5557v2 [cs.DC].
- 47 Jones, C. E., A. L. Brown and U. Baumann, 2007 Estimating the annotation error rate of curated  
48 GO database sequence annotations. *BMC Bioinformatics* 8: 170.
- 49 Journey, R., 2013 *Agile data science*. O'Reilly Media, Beijing ; Sebastopol, CA.
- 50 Karr, J. R., J. C. Sanghvi, D. N. Macklin, M. V. Gutschow, J. M. Jacobs *et al.*, 2012 A whole-cell  
51 computational model predicts phenotype from genotype. *Cell* 150: 389-401.

- 1 Karr, J. R., K. Takahashi and A. Funahashi, 2015a The principles of whole-cell modeling. *Curr Opin Microbiol* 27: 18-24.
- 2
- 3 Karr, J. R., A. H. Williams, J. D. Zucker, A. Raue, B. Steiert *et al.*, 2015b Summary of the  
4 DREAM8 Parameter Estimation Challenge: Toward Parameter Identification for Whole-  
5 Cell Models. *PLoS Comput Biol* 11: e1004096.
- 6 Kenall, A., S. Edmunds, L. Goodman, L. Bal, L. Flintoft *et al.*, 2015 Better reporting for better  
7 research: a checklist for reproducibility. *Gigascience* 4: 32.
- 8 Knuth, D. E., and S. Levy, 1994 *The CWEB system of structured documentation : version 3.0*.  
9 Addison-Wesley Pub. Co., Reading, Mass.
- 10 Lander, E. S., L. M. Linton, B. Birren, C. Nusbaum, M. C. Zody *et al.*, 2001 Initial sequencing  
11 and analysis of the human genome. *Nature* 409: 860-921.
- 12 Lee, Y., and J. Quackenbush, 2003 Using the TIGR gene index databases for biological  
13 discovery. *Curr Protoc Bioinformatics* Chapter 1: Unit 1 6.
- 14 Lee, Y., J. Tsai, S. Sunkara, S. Karamycheva, G. Pertea *et al.*, 2005 The TIGR Gene Indices:  
15 clustering and assembling EST and known genes and integration with eukaryotic  
16 genomes. *Nucleic Acids Res* 33: D71-74.
- 17 Lesgold, A., H. Rubinson, P. Feltovich, R. Glaser, D. Klopfer *et al.*, 1988 Expertise in a Complex  
18 Skill: Diagnosing X-Ray Pictures. in *The Nature of Expertise.*, edited by R. G. Micheline  
19 Chi and M. Farr. Lawrence Erlbaum, Hillsdale, NJ.
- 20 Lifschitz, V., K. Pichotta and F. K. Yang, 2012 Relational theories with null values and non-  
21 herbrand stable models. *Theory and Practice of Logic Programming* 12: 565-582.
- 22 Loewe, L., 2016 Systems in Evolutionary System Biology. *Encyclopedia of Evolutionary Biology*  
23 ed. 1, vol. 4: 297-318 ([http://evolutionarysystemsbiology.org/pdf/Loewe-2016-](http://evolutionarysystemsbiology.org/pdf/Loewe-2016-evosysbio.pdf)  
24 [evosysbio.pdf](http://evolutionarysystemsbiology.org/pdf/Loewe-2016-evosysbio.pdf)).
- 25 Loewe, L., and S. Keel, 2014 BEST Names for Semantic Units to Support Reproducible  
26 Modeling, pp. 4 pages, *Workshop: "reproducibility@XSEDE", XSEDE14 Annual*  
27 *Conference* [https://www.xsede.org/documents/659353/703287/xsede659314\\_loewe.pdf](https://www.xsede.org/documents/659353/703287/xsede659314_loewe.pdf)  
28 in 2014-07-14 ( <https://www.xsede.org/web/reproducibility> ), Atlanta, GA, USA.
- 29 Loewe, L., K. S. Scheuer and S. Keel, 2016 Evolvix Concept: BEST Names for Semantic Units  
30 Increase Semantic Reproducibility and Help Combine Complex Biological Models, pp.  
31 <https://sites.google.com/site/dslabhs2016/proceeding-papers> in *Workshop on Data*  
32 *Science, Learning, and Applications to Biomedical & Health Sciences, January 7 - 8,*  
33 *2016*. NY Academy of Sciences, New York Academy of Sciences.
- 34 Loewe, L., K. S. Scheuer, S. A. Keel, V. Vyas, B. Liblit *et al.*, 2017 Evolvix BEST Names for  
35 semantic reproducibility across code2brain interfaces; with 74 pages online material at  
36 <http://dx.doi.org/10.1111/nyas.13192> and updates at <http://evolvix.org/naming> ;  
37 <http://evolvix.org/post>. *Annals of the New York Academy of Sciences* 1387: 124-144.
- 38 Magnussen, S., B. Smith, C. Kleinn and I. F. Sun, 2010 An urn model for species richness  
39 estimation in quadrat sampling from fixed-area populations. *Forestry* 83: 293-306.
- 40 Mahmood, Z., 2016 *Data science and big data computing : frameworks and methodologies*.  
41 Springer Berlin Heidelberg, New York, NY.
- 42 Martinez, M. V., C. Molinaro, J. Grant and V. S. Subrahmanian, 2013 Customized Policies for  
43 Handling Partial Information in Relational Databases. *IEEE Transactions on Knowledge*  
44 *and Data Engineering* 25: 1254-1271.
- 45 McCallum, Q. E., 2013 *Bad Data Handbook: Mapping the world of data problems*. O'Reilly,  
46 Sebastopol, CA.
- 47 Mirza, G. A., 2015 Null Value Conflict: Formal Definition and Resolution. 2015 13th International  
48 Conference on Frontiers of Information Technology (Fit): 132-137.
- 49 NASA, F. Chandler, T., Y. H. Chang, James, A. Mosleh, J. Marble, L. *et al.*, 2006-07 *Human*  
50 *Reliability Analysis Methods Selection Guidance for NASA*. NASA/OSMA, NASA,  
51 Washington, DC.

- 1 NASA, K. Leiden, K. R. Laughery, J. Keller, J. French *et al.*, 2001-09-30 *A Review of Human*  
2 *Performance Models for the Prediction of Human Error*. National Aeronautics and Space  
3 Administration, System-Wide Accident Prevention Program, Ames Research Center,  
4 Moffett Field, CA,  
5 <http://citeseerx.ist.psu.edu/viewdoc/download?doi=10.1.1.468.6969&rep=rep1&type=pdf>  
6 NASA, M. Stamatelatos and H. Dezfuli, 2011 *Probabilistic Risk Assessment Procedures Guide*  
7 *for NASA Managers and Practitioners (2nd Edition)*, NASA Headquarters, Washington,  
8 DC.  
9 NIH, D. DeMets, L. Tabak, R. Altman, D. Botstein *et al.*, 2012 Data and Informatics Working  
10 Group Report to the Advisory Committee to the Director, pp., <http://acd.od.nih.gov/Data>  
11 and Informatics Working Group Report.PDF.  
12 Orchard, S., and H. Hermjakob, 2015 Shared resources, shared costs--leveraging biocuration  
13 resources. Database (Oxford) 2015.  
14 Panko, R. R., 1998 Applying code inspection to spreadsheet testing. *Effective Utilization and*  
15 *Management of Emerging Information Technologies*: 358-362.  
16 Panko, R. R., 2016 Human Error Website. Accessed 2016-10-31:  
17 <http://panko.shidler.hawaii.edu/HumanErr/Index.htm>  
18 Panko, R. R., and S. Aurigemma, 2010 Revising the Panko-Halverson taxonomy of spreadsheet  
19 errors. *Decision Support Systems* 49: 235-244.  
20 Panko, R. R., and R. H. Sprague, 1998 Hitting the wall: errors in developing and code  
21 inspecting a 'simple' spreadsheet model. *Decision Support Systems* 22: 337-353.  
22 Parsons, T. W., 1992 *Introduction to Compiler Construction*. Computer Science Press, New  
23 York.  
24 Pertea, G., X. Huang, F. Liang, V. Antonescu, R. Sultana *et al.*, 2003 TIGR Gene Indices  
25 clustering tools (TGICL): a software system for fast clustering of large EST datasets.  
26 *Bioinformatics* 19: 651-652.  
27 Poldrack, R. A., and J. B. Poline, 2015 The publication and reproducibility challenges of shared  
28 data. *Trends Cogn Sci* 19: 59-61.  
29 Quackenbush, J., F. Liang, I. Holt, G. Pertea and J. Upton, 2000 The TIGR gene indices:  
30 reconstruction and representation of expressed gene sequences. *Nucleic Acids Res* 28:  
31 141-145.  
32 Rak, R., R. T. Batista-Navarro, A. Rowley, J. Carter and S. Ananiadou, 2014 Text-mining-  
33 assisted biocuration workflows in Argo. Database (Oxford) 2014.  
34 Razali, N., J. Noble and S. Marshall, 2015-10-26 Operators and Precedence in Programming  
35 Languages. PLATEAU'15: 53-56 (<http://dx.doi.org/10.1145/2846680.2846690> ).  
36 Reason, J., 2005 Safety in the operating theatre - Part 2: human error and organisational failure.  
37 *Qual Saf Health Care* 14: 56-60.  
38 Reason, J. T., 1990 *Human error*. Cambridge University Press, Cambridge England ; New York.  
39 Reason, J. T., 2013 *A life in error : from little slips to big disasters*. Ashgate, Surrey, UK  
40 England.  
41 Reason, J. T., 2015 *Organizational accidents revisited*. Ashgate, Burlington, VT.  
42 Reason, J. T., and A. Hobbs, 2003 *Managing maintenance error : a practical guide*. Ashgate,  
43 Aldershot, Hampshire, England ; Burlington, VT, USA.  
44 Reason, J. T., and K. Mycielska, 1982 *Absent-minded? : the psychology of mental lapses and*  
45 *everyday errors*. Prentice-Hall, Englewood Cliffs, N.J.  
46 Reiser, L., T. Z. Berardini, D. Li, R. Muller, E. M. Strait *et al.*, 2016 Sustainable funding for  
47 biocuration: The Arabidopsis Information Resource (TAIR) as a case study of a  
48 subscription-based funding model. Database (Oxford) 2016.  
49 Rodriguez-Esteban, R., 2015 Biocuration with insufficient resources and fixed timelines.  
50 Database (Oxford) 2015.

- 1 Salimi, N., and R. Vita, 2006 The biocurator: Connecting and enhancing scientific data. Plos  
2 Computational Biology 2: 1190-1192.
- 3 Sanger, F., G. M. Air, B. G. Barrell, N. L. Brown, A. R. Coulson *et al.*, 1977a Nuclotide  
4 sequence of bacteriophage phi X174 DNA. Nature 265: 687-695.
- 5 Sanger, F., S. Nicklen and A. R. Coulson, 1977b DNA sequencing with chain-terminating  
6 inhibitors. Proceedings of the National Academy of Sciences of the U.S.A. 74: 5463-  
7 5467.
- 8 Sheridan, C., 2014 Illumina claims \$1,000 genome win. Nat Biotechnol 32: 115.
- 9 Singhal, A., R. Leaman, N. Catlett, T. Lemberger, J. McEntyre *et al.*, 2016 Pressing needs of  
10 biomedical text mining in biocuration and beyond: opportunities and challenges.  
11 Database (Oxford) 2016.
- 12 Smith, N. J. J., 2008 *Vagueness and Degrees of Truth*. Oxford University Press, Oxford, Great  
13 Britain.
- 14 Stodden, V., 2015 Reproducing Statistical Results. Annu. Rev. Stat. Appl. 2: 1-19.
- 15 Stodden, V., F. Leisch and R. D. Peng (Editors), 2014 *Implementing Reproducible Research*.  
16 CRC Press, Boca Raton, FL.
- 17 Telenti, A., L. C. Pierce, W. H. Biggs, J. di Iulio, E. H. Wong *et al.*, 2016 Deep sequencing of  
18 10,000 human genomes. Proc Natl Acad Sci U S A 113: 11901-11906.
- 19 Thalheim, B., and K. D. Schewe, 2011 NULL 'Value' Algebras and Logics. Information Modelling  
20 and Knowledge Bases Xxii 225: 354-367.
- 21 Venter, J. C., M. D. Adams, E. W. Myers, P. W. Li, R. J. Mural *et al.*, 2001 The sequence of the  
22 human genome. Science 291: 1304-1351.
- 23 Waraporn, N., and K. Porkaew, 2008 Semantics of null values in subqueries. Imecs 2008:  
24 International Multiconference of Engineers and Computer Scientists, Vols I and II: 400-  
25 405.
- 26 Wei, C. H., H. Y. Kao and Z. Lu, 2013 PubTator: a web-based text mining tool for assisting  
27 biocuration. Nucleic Acids Res 41: W518-522.
- 28 Weil, G., C. Motamed, A. Eghiaian, M. L. Guye and J. L. Bourgain, 2015 The use of a clinical  
29 database in an anesthesia unit: focus on its limits. J Clin Monit Comput 29: 163-167.
- 30 Zaniolo, C., 1984 Database Relations with Null Values. Journal of Computer and System  
31 Sciences 28: 142-166.
- 32 Zhang, H. M., and H. Stern, 2009 Sample Size Calculation for Finding Unseen Species.  
33 Bayesian Analysis 4: 763-791.
- 34  
35

1  
2  
3  
4  
5  
6  
7  
8  
9  
10  
11  
12  
13  
14  
15  
16  
17  
18  
19  
20  
21  
22  
23  
24  
25  
26  
27  
28  
29  
30  
31  
32  
33  
34  
35  
36  
37  
38  
39  
40  
41  
42  
43  
44  
45  
46  
47  
48  
49  
50

## LITERATURE CITED IN MAIN TEXT

- 2016 *Advances in mathematical modeling, optimization and optimal control*. Springer Science+Business Media, New York, NY.
- Aarts, A. A., J. E. Anderson, C. J. Anderson, P. R. Attridge, A. Attwood *et al.*, 2015 Estimating the reproducibility of psychological science. *Science* 349.
- Abruzzi, K., X. Chen, E. Nagoshi, A. Zadina and M. Rosbash, 2015 RNA-seq profiling of small numbers of *Drosophila* neurons. *Meth Enzymol* 551: 369-386.
- Abruzzi, K. C., J. Rodriguez, J. S. Menet, J. Desrochers, A. Zadina *et al.*, 2011 *Drosophila* CLOCK target gene characterization: implications for circadian tissue-specific gene expression. *Genes & development* 25: 2374-2386.
- Ades, A. E., N. J. Welton, D. Caldwell, M. Price, A. Goubar *et al.*, 2008 Multiparameter evidence synthesis in epidemiology and medical decision-making. *J Health Serv Res Policy* 13 Suppl 3: 12-22.
- Adewoye, A. B., C. P. Kyriacou and E. Tauber, 2015 Identification and functional analysis of early gene expression induced by circadian light-resetting in *Drosophila*. *BMC Genomics* 16: 570.
- Agostinelli, F., N. Ceglia, B. Shahbaba, P. Sassone-Corsi and P. Baldi, 2016 What time is it? Deep learning approaches for circadian rhythms. *Bioinformatics* 32: i8-i17.
- Aimo, L., R. Liechti, N. Hyka-Nouspikel, A. Niknejad, A. Gleizes *et al.*, 2015 The SwissLipids knowledgebase for lipid biology. *Bioinformatics* 31: 2860-2866.
- Aird, D., M. G. Ross, W. S. Chen, M. Danielsson, T. Fennell *et al.*, 2011 Analyzing and minimizing PCR amplification bias in Illumina sequencing libraries. *Genome Biol* 12: R18.
- Akman, O., M. L. Guerriero, L. Loewe and C. Troein, 2010 Complementary approaches to understanding the plant circadian clock. Proceedings 3rd Workshop "From Biology To Concurrency and back" - FBTC 2010 published in *Electronic Proceedings in Theoretical Computer Science* 19: 1-19 (<http://arxiv.org/abs/1002.4661v1001>).
- Akten, B., E. Jauch, G. K. Genova, E. Y. Kim, I. Edery *et al.*, 2003 A role for CK2 in the *Drosophila* circadian oscillator. *Nature neuroscience* 6: 251-257.
- Allada, R., N. E. White, W. V. So, J. C. Hall and M. Rosbash, 1998 A mutant *Drosophila* homolog of mammalian Clock disrupts circadian rhythms and transcription of period and timeless. *Cell* 93: 791-804.
- Allison, D. B., A. W. Brown, B. J. George and K. A. Kaiser, 2016 Reproducibility: A tragedy of errors. *Nature* 530: 27-29.
- Altman, D. G., S. M. Gore, M. J. Gardner and S. J. Pocock, 1983 Statistical guidelines for contributors to medical journals. *Br Med J (Clin Res Ed)* 286: 1489-1493.
- Amos, W., C. M. Hutter, M. D. Schug and C. F. Aquadro, 2003 Directional evolution of size coupled with ascertainment bias for variation in *Drosophila* microsatellites. *Mol Biol Evol* 20: 660-662.
- Anderson, D. F., 2007 A modified next reaction method for simulating chemical systems with time dependent propensities and delays. *J Chem Phys* 127: 214107.
- Anderson, D. F., A. Ganguly and T. G. Kurtz, 2011 Error Analysis of Tau-Leap Simulation Methods. *Annals of Applied Probability* 21: 2226-2262.
- Annosi, M. C., M. Magnusson, A. Martini and F. P. Appio, 2016 Social Conduct, Learning and Innovation: An Abductive Study of the Dark Side of Agile Software Development. *Creativity and Innovation Management* 25: 515-535.

- 1 Arp, R., B. Smith and A. D. Spear, 2015 *Building ontologies with Basic Formal Ontology*.
- 2 Massachusetts Institute of Technology, Cambridge, Massachusetts
- 3 <http://ontology.buffalo.edu/smith/>.
- 4 Ascher, U. M., and L. R. Petzold, 1998 *Computer Methods for Ordinary Differential Equations*
- 5 *and Differential-Algebraic Equations*. SIAM, Philadelphia.
- 6 Ashburner, M., and R. Drysdale, 1994 FlyBase--the Drosophila genetic database. *Development*
- 7 120: 2077-2079.
- 8 Ashley, E. A., 2016 Towards precision medicine. *Nat Rev Genet* 17: 507-522.
- 9 Bae, K., and I. Edery, 2006 Regulating a Circadian Clock's Period, Phase and Amplitude by
- 10 Phosphorylation: Insights from Drosophila. *Journal of Biochemistry* 140: 609-617.
- 11 Bae, K., C. Lee, P. Hardin and I. Edery, 2000 dCLOCK is present in limiting amounts and likely
- 12 mediates daily interactions between the dCLOCK-CYC transcription factor and the PER-
- 13 TIM complex. *Journal of Neuroscience* 20: 1746-1753.
- 14 Bae, K., C. Lee, D. Sidote, K. Y. Chuang and I. Edery, 1998 Circadian regulation of a
- 15 Drosophila homolog of the mammalian Clock gene: PER and TIM function as positive
- 16 regulators. *Mol Cell Biol* 18: 6142-6151.
- 17 Bagheri, N., M. J. Lawson, J. Stelling and F. J. Doyle, 2008a Modeling the Drosophila
- 18 melanogaster Circadian Oscillator via Phase Optimization. *Journal of biological rhythms*
- 19 23: 525-537.
- 20 Bagheri, N., J. Stelling and F. J. Doyle, 2007 Circadian phase entrainment via nonlinear model
- 21 predictive control. *International Journal of Robust and Nonlinear Control* 17: 1555-1571.
- 22 Bagheri, N., S. R. Taylor, K. Meeker, L. R. Petzold and F. J. Doyle, 2008b Synchrony and
- 23 entrainment properties of robust circadian oscillators., pp. S17-28 in *J R Soc Interface*.
- 24 Baker, M., 2016 1,500 scientists lift the lid on reproducibility. *Nature* 533: 452-454.
- 25 Bammler, T., R. P. Beyer, S. Bhattacharya, G. A. Boorman, A. Boyles *et al.*, 2005 Standardizing
- 26 global gene expression analysis between laboratories and across platforms. *Nat*
- 27 *Methods* 2: 351-356.
- 28 Banko, Z., and J. Abonyi, 2015 Mixed dissimilarity measure for piecewise linear approximation
- 29 based time series applications. *Expert Systems with Applications* 42: 7664-7675.
- 30 Bao, S., J. Rihel, E. Bjes, J. Y. Fan and J. L. Price, 2001 The Drosophila double-timeS mutation
- 31 delays the nuclear accumulation of period protein and affects the feedback regulation of
- 32 period mRNA. *Journal of Neuroscience* 21: 7117-7126.
- 33 Barba, L. A., 2016 The hard road to reproducibility. *Science* 354: 142-142.
- 34 Barkai, N., and S. Leibler, 2000 Circadian clocks limited by noise. *Nature* 403: 267-268.
- 35 Barrett, T., T. O. Suzek, D. B. Troup, S. E. Wilhite, W. C. Ngau *et al.*, 2005 NCBI GEO: mining
- 36 millions of expression profiles--database and tools. *Nucleic Acids Res* 33: D562-566.
- 37 Barrett, T., D. B. Troup, S. E. Wilhite, P. Ledoux, C. Evangelista *et al.*, 2011 NCBI GEO: archive
- 38 for functional genomics data sets--10 years on. *Nucleic Acids Res* 39: D1005-1010.
- 39 Barrett, T., S. E. Wilhite, P. Ledoux, C. Evangelista, I. F. Kim *et al.*, 2013 NCBI GEO: archive for
- 40 functional genomics data sets--update. *Nucleic Acids Res* 41: D991-995.
- 41 Bartling, S., and S. Friesike, 2014 *Opening science*. Springer, New York,
- 42 <http://book.openingscience.org/>
- 43 Bateman, A., 2010 Curators of the world unite: the International Society of Biocuration.
- 44 *Bioinformatics* 26: 991.
- 45 Batista, G. E. A. P. A., X. Wang and E. J. Keogh, 2011 A Complexity-Invariant Distance
- 46 Measure for Time Series.
- 47 Batista, R. T., D. B. Ramirez, R. D. Santos, M. C. del Rosario and E. R. Mendoza, 2007
- 48 EUCLIS--an information system for circadian systems biology. *IET Syst Biol* 1: 266-273.
- 49 Bauer, P., A. Thorpe and G. Brunet, 2015 The quiet revolution of numerical weather prediction.
- 50 *Nature* 525: 47-55.

- 1 Baylies, M. K., L. B. Vosshall, A. Sehgal and M. W. Young, 1992 New Short-Period Mutations of  
2 the *Drosophila* Clock Gene *Per*. *Neuron* 9: 575-581.
- 3 Beaver, L. M., B. O. Gvakharia, T. S. Vollintine, D. M. Hege, R. Stanewsky *et al.*, 2002 Loss of  
4 circadian clock function decreases reproductive fitness in males of *Drosophila*  
5 *melanogaster*., pp. 2134-2139 in *P Natl Acad Sci Usa*.
- 6 Beaver, L. M., L. A. Hooven, S. M. Butcher, N. Krishnan, K. A. Sherman *et al.*, 2010 Circadian  
7 clock regulates response to pesticides in *Drosophila* via conserved Pdp1 pathway., pp.  
8 513-520 in *Toxicol. Sci*.
- 9 Beaver, L. M., B. L. Rush, B. O. Gvakharia and J. M. Giebultowicz, 2003 Noncircadian  
10 regulation and function of clock genes *period* and *timeless* in oogenesis of *Drosophila*  
11 *melanogaster*., pp. 463-472 in *J Biol Rhythms*.
- 12 Beersma, D. G. M., 2005 Why and how do we model circadian rhythms? *Journal of Biological*  
13 *Rhythms* 20: 304-313.
- 14 Bell-Pedersen, D., V. M. Cassone, D. J. Earnest, S. S. Golden, P. E. Hardin *et al.*, 2005  
15 Circadian rhythms from multiple oscillators: Lessons from diverse organisms. *Nature*  
16 *Reviews Genetics* 6: 544-556.
- 17 Berndt, A., T. Kottke, H. Breitkreuz, R. Dvorsky, S. Hennig *et al.*, 2007 A Novel Photoreaction  
18 Mechanism for the Circadian Blue Light Photoreceptor *Drosophila* Cryptochrome.  
19 *Journal of Biological Chemistry* 282: 13011-13021.
- 20 Bishop, C. M., 2006 *Pattern recognition and machine learning*. Springer, New York.
- 21 Blankenberg, D., J. E. Johnson, J. Taylor, A. Nekrutenko and G. Team, 2014 Wrangling  
22 Galaxy's reference data. *Bioinformatics* 30: 1917-1919.
- 23 Blau, J., 1999 Cycling *vri* Expression Is Required for a Functional *Drosophila* Clock. *Cell* 99:  
24 661-671.
- 25 Boos, D. D., and L. A. Stefanski, 2011 P-Value Precision and Reproducibility. *American*  
26 *Statistician* 65: 213-221.
- 27 Bourne, P. E., and J. McEntyre, 2006 Biocurators: Contributors to the world of science. *PLOS*  
28 *Computational Biology* 2: 1185-1185.
- 29 Boyle, G., K. Richter, H. D. Priest, D. Traver, T. C. Mockler *et al.*, 2017 Comparative Analysis of  
30 Vertebrate Diurnal/Circadian Transcriptomes. *PLOS ONE* 12: e0169923.
- 31 Brandes, C., J. D. Plautz, R. Stanewsky, C. F. Jamison, M. Straume *et al.*, 1996 Novel features  
32 of *drosophila* *period* Transcription revealed by real-time luciferase reporting. *Neuron* 16:  
33 687-692.
- 34 Brodland, G. W., 2015 How computational models can help unlock biological systems.  
35 *Seminars in Cell & Developmental Biology* 47-48.
- 36 Broman, K. W., 1999 Cleaning genotype data. *Genet Epidemiol* 17 Suppl 1: S79-83.
- 37 Broman, K. W., M. P. Keller, A. T. Broman, C. Kendziorski, B. S. Yandell *et al.*, 2015  
38 Identification and Correction of Sample Mix-Ups in Expression Genetic Data: A Case  
39 Study. *G3 (Bethesda)* 5: 2177-2186.
- 40 Brooksbank, C., G. Cameron and J. Thornton, 2005 The European Bioinformatics Institute's  
41 data resources: towards systems biology. *Nucleic Acids Res* 33: D46-53.
- 42 Buck, S., 2015 Solving reproducibility. *Science* 348: 1403.
- 43 Bullard, J. H., E. Purdom, K. D. Hansen and S. Dudoit, 2010 Evaluation of statistical methods  
44 for normalization and differential expression in mRNA-Seq experiments. *Bmc*  
45 *Bioinformatics* 11.
- 46 Burge, S., T. K. Attwood, A. Bateman, T. Z. Berardini, M. Cherry *et al.*, 2012 Biocurators and  
47 Biocuration: surveying the 21st century challenges. *Database-the Journal of Biological*  
48 *Databases and Curation*.
- 49 Burkhardt, K., B. Schneider and J. Ory, 2006 A biocurator perspective: Annotation at the  
50 research collaboratory for structural bioinformatics protein data bank. *PLOS*  
51 *Computational Biology* 2: 1186-1189.

- 1 Bussieck, M. R., and A. Meeraus, 2004 General algebraic modeling system (GAMS). Modeling  
2 Languages in Mathematical Optimization 88: 137-157.
- 3 Bustin, S. A., 2002 Quantification of mRNA using real-time reverse transcription PCR (RT-  
4 PCR): trends and problems. Journal of Molecular Endocrinology 29: 23-39.
- 5 Bustin, S. A., and T. Nolan, 2004 Pitfalls of quantitative real-time reverse-transcription  
6 polymerase chain reaction. J Biomol Tech 15: 155-166.
- 7 Busza, A., M. Emery-Le, M. Rosbash and P. Emery, 2004 Roles of the two Drosophila  
8 CRYPTOCHROME structural domains in circadian photoreception. Science 304: 1503-  
9 1506.
- 10 Buzbas, E. O., and N. A. Rosenberg, 2015 AABC: approximate approximate Bayesian  
11 computation for inference in population-genetic models. Theor Popul Biol 99: 31-42.
- 12 Canales, B. K., 2016 Comment On: Prospective evaluation of urinary metabolic indices in  
13 severely obese adolescents after weight loss surgery. Surg Obes Relat Dis 12: 367-368.
- 14 Canales, R. D., Y. Luo, J. C. Willey, B. Austermler, C. C. Barbacioru *et al.*, 2006 Evaluation of  
15 DNA microarray results with quantitative gene expression platforms. Nat Biotechnol 24:  
16 1115-1122.
- 17 Candan, K. S., J. Grant and V. S. Subrahmanian, 1997 A unified treatment of null values using  
18 constraints. Information Sciences 98: 99-156.
- 19 Carling, K., 2000 Resistant outlier rules and the non-Gaussian case. Computational Statistics &  
20 Data Analysis 33: 249-258.
- 21 Carter, S. J., H. J. Durrington, J. E. Gibbs, J. Blaikley, A. S. Loudon *et al.*, 2016 A matter of  
22 time: study of circadian clocks and their role in inflammation. Journal of Leukocyte  
23 Biology 99: 549-560.
- 24 Carthey, J., M. R. de Leval, D. J. Wright, V. T. Farewell, J. T. Reason *et al.*, 2003 Behavioural  
25 markers of surgical excellence. Safety Science 41: 409-425.
- 26 Cassman, M., 2005 Barriers to progress in systems biology. Nature 438: 1079.
- 27 Cathala, G., J. F. Savouret, B. Mendez, B. L. West, M. Karin *et al.*, 1983 A Method for Isolation  
28 of Intact, Translationally Active Ribonucleic-Acid. DNA-a Journal of Molecular & Cellular  
29 Biology 2: 329-335.
- 30 Ceriani, M. F., T. K. Darlington, D. Staknis, P. Más, A. A. Petti *et al.*, 1999 Light-dependent  
31 sequestration of TIMELESS by CRYPTOCHROME. Science 285: 553-556.
- 32 Ceriani, M. F., J. B. Hogenesch, M. Yanovsky, S. Panda, M. Straume *et al.*, 2002 Genome-wide  
33 expression analysis in Drosophila reveals genes controlling circadian behavior. Journal  
34 of Neuroscience 22: 9305-9319.
- 35 Chelliah, V., N. Juty, I. Ajmera, R. Ali, M. Dumousseau *et al.*, 2015 BioModels: ten-year  
36 anniversary. Nucleic Acids Res 43: D542-548.
- 37 Chen, K. F., N. Peschel, R. Zavodska, H. Sehadova and R. Stanewsky, 2011 QUASIMODO, a  
38 Novel GPI-Anchored Zona Pellucida Protein Involved in Light Input to the Drosophila  
39 Circadian Clock. Current biology : CB 21: 719-729.
- 40 Chen, W.-F., J. Majercak and I. Edery, 2006 Clock-gated photic stimulation of timeless  
41 expression at cold temperatures and seasonal adaptation in Drosophila., pp. 256-271 in  
42 *J Biol Rhythms*.
- 43 Cheng, Y., B. Gvakharia and P. E. Hardin, 1998 Two alternatively spliced transcripts from the  
44 Drosophila period gene rescue rhythms having different molecular and behavioral  
45 characteristics., pp. 6505-6514 in *Mol Cell Biol*.
- 46 Chintapalli, V. R., M. Al Bratty, D. Korzekwa, D. G. Watson and J. A. Dow, 2013a Mapping an  
47 atlas of tissue-specific Drosophila melanogaster metabolomes by high resolution mass  
48 spectrometry. PLOS ONE 8: e78066.
- 49 Chintapalli, V. R., J. Wang and J. A. Dow, 2007 Using FlyAtlas to identify better Drosophila  
50 melanogaster models of human disease. Nat Genet 39: 715-720.



- 1 Chintapalli, V. R., J. Wang, P. Herzyk, S. A. Davies and J. A. Dow, 2013b Data-mining the  
2 FlyAtlas online resource to identify core functional motifs across transporting epithelia.  
3 BMC Genomics 14: 518.
- 4 Chiu, J. C., H. W. Ko and I. Edery, 2011 NEMO/NLK phosphorylates PERIOD to initiate a time-  
5 delay phosphorylation circuit that sets circadian clock speed., pp. 357-370 in *Cell*.
- 6 Chiu, J. C., J. T. Vanselow, A. Kramer and I. Edery, 2008 The phospho-occupancy of an  
7 atypical SLIMB-binding site on PERIOD that is phosphorylated by DOUBLETIME  
8 controls the pace of the clock. *Genes & development* 22: 1758-1772.
- 9 Chomczynski, P., and N. Sacchi, 1987 Single-Step Method of Rna Isolation by Acid  
10 Guanidinium Thiocyanate Phenol Chloroform Extraction. *Analytical Biochemistry* 162:  
11 156-159.
- 12 Chouhan, N. S., R. Wolf, C. Helfrich-Forster and M. Heisenberg, 2015 Flies remember the time  
13 of day. *Curr Biol* 25: 1619-1624.
- 14 Chylek, L. A., L. A. Harris, J. R. Faeder and W. S. Hlavacek, 2015 Modeling for (physical)  
15 biologists: an introduction to the rule-based approach. *Physical Biology* 12.
- 16 Cirelli, C., 2009 The genetic and molecular regulation of sleep: from fruit flies to humans. *Nature*  
17 *Reviews Neuroscience* 10: 549-560.
- 18 Citri, Y., H. V. Colot, A. C. Jacquier, Q. Yu, J. C. Hall *et al.*, 1987 A family of unusually spliced  
19 biologically active transcripts encoded by a *Drosophila* clock gene., pp. 42-47 in *Nature*.
- 20 Claridge-Chang, A., H. Wijnen, F. Naef, C. Boothroyd, N. Rajewsky *et al.*, 2001 Circadian  
21 regulation of gene expression systems in the *Drosophila* head. *Neuron* 32: 657-671.
- 22 Clark, A. G., M. J. Hubisz, C. D. Bustamante, S. H. Williamson and R. Nielsen, 2005  
23 Ascertainment bias in studies of human genome-wide polymorphism. *Genome Res* 15:  
24 1496-1502.
- 25 Clough, E., and T. Barrett, 2016 The Gene Expression Omnibus Database. *Methods Mol Biol*  
26 1418: 93-110.
- 27 Collins, F. S., and L. A. Tabak, 2014 Policy: NIH plans to enhance reproducibility. *Nature* 505:  
28 612-613.
- 29 Coogan, A. N., A. L. Baird, A. Popa-Wagner and J. Thome, 2016 Circadian rhythms and  
30 attention deficit hyperactivity disorder: The what, the when and the why. *Progress in*  
31 *Neuro-Psychopharmacology & Biological Psychiatry* 67: 74-81.
- 32 Cooper, K. D. T., Linda, 2012 *Engineering A Compiler*. Morgan Kaufmann, Burlington, MA.
- 33 Costa, R., A. A. Peixoto, G. Barbujani and C. P. Kyriacou, 1992 A latitudinal cline in a  
34 *Drosophila* clock gene., pp. 43-49 in *Proc Biol Sci*.
- 35 Cotterman, C. W., 1983 Relationship and probability in Mendelian populations. *Am J Med Genet*  
36 16: 393-440.
- 37 Coyne, J. A., and H. A. Orr, 2004 *Speciation*. Sinauer Associates, Sunderland, Mass.
- 38 Crosby, J. L., 1973 *Computer simulation in genetics*. Wiley, London, New York,.
- 39 Crow, J. F., 2001 Shannon's brief foray into genetics. *Genetics* 159: 915-917.
- 40 Csillery, K., M. G. Blum, O. E. Gaggiotti and O. Francois, 2010a Approximate Bayesian  
41 Computation (ABC) in practice. *Trends Ecol Evol* 25: 410-418.
- 42 Csillery, K., M. G. B. Blum, O. E. Gaggiotti and O. Francois, 2010b Approximate Bayesian  
43 Computation (ABC) in practice. *Trends in Ecology & Evolution* 25: 410-418.
- 44 Cumming, G., 2013 The New Statistics: A How-To Guide. *Australian Psychologist* 48: 161-170.
- 45 Cumming, G., 2014 The New Statistics: Why and How. *Psychological Science* 25: 7-29.
- 46 Curran-Everett, D., 2009 Explorations in statistics: confidence intervals. *Advances in Physiology*  
47 *Education* 33: 87-90.
- 48 Cusick, M. E., H. Yu, A. Smolyar, K. Venkatesan, A. R. Carvunis *et al.*, 2009 Literature-curated  
49 protein interaction datasets. *Nat Methods* 6: 39-46.

- 1 Cyran, S. A., A. M. Buchsbaum, K. L. Reddy, M.-C. Lin, N. R. J. Glossop *et al.*, 2003 vrille,  
2 Pdp1, and dClock form a second feedback loop in the Drosophila circadian clock. *Cell*  
3 112: 329-341.
- 4 Daigle, B. J., Jr., M. K. Roh, L. R. Petzold and J. Niemi, 2012 Accelerated maximum likelihood  
5 parameter estimation for stochastic biochemical systems. *BMC Bioinformatics* 13: 68.
- 6 Darlington, T. K., K. Wager-Smith, M. F. Ceriani, D. Staknis, N. Gekakis *et al.*, 1998 Closing the  
7 circadian loop: CLOCK-induced transcription of its own inhibitors per and tim. *Science*  
8 280: 1599-1603.
- 9 Dawkins, R., 1976 *The selfish gene*. Oxford University Press, Oxford.
- 10 Dawkins, R., 2016 *The selfish gene : 40th anniversary edition*. Oxford University Press, New  
11 York, NY.
- 12 de Tre, G., R. de Caluwe and H. Prade, 2004 Null values revisited in prospect of data  
13 integration. *Semantics of a Networked World: Semantics for Grid Databases* 3226: 79-  
14 90.
- 15 Debray, T. P., K. G. Moons, G. van Valkenhoef, O. Efthimiou, N. Hummel *et al.*, 2015 Get real in  
16 individual participant data (IPD) meta-analysis: a review of the methodology. *Res Synth*  
17 *Methods* 6: 293-309.
- 18 Demidenko, E., 2016 The p-Value You Can't Buy. *American Statistician* 70: 33-38.
- 19 Deng, Z., S. Arsenault, C. Caranica, J. Griffith, T. Zhu *et al.*, 2016 Synchronizing stochastic  
20 circadian oscillators in single cells of *Neurospora crassa*. *Sci Rep* 6: 35828.
- 21 Diambra, L., and C. P. Malta, 2012 Modeling the emergence of circadian rhythms in a clock  
22 neuron network. *PLOS ONE* 7: e33912.
- 23 Ding, H., G. Trajcevski, P. Scheuermann, X. Wang and E. J. Keogh, 2008 Querying and Mining  
24 of Time Series Data Experimental Comparison of Representations and Distance  
25 Measures.
- 26 Dissel, S., V. Codd, R. Fedic, K. J. Garner, R. Costa *et al.*, 2004 A constitutively active  
27 cryptochrome in *Drosophila melanogaster*. *Nature neuroscience* 7: 834-840.
- 28 DiStefano, J. J., 2013 *Dynamic systems biology modeling and simulation*. Elsevier, Academic  
29 Press, Amsterdam.
- 30 Doan, A., A. Halevy and Z. G. Ives, 2012 *Principles of data integration*. Morgan Kaufmann,  
31 Waltham, MA.
- 32 Dodd, A. N., N. Salathia, A. Hall, E. Kevei, R. Toth *et al.*, 2005 Plant circadian clocks increase  
33 photosynthesis, growth, survival, and competitive advantage. *Science* 309: 630-633.
- 34 Doherty, C. J., and S. A. Kay, 2010 Circadian control of global gene expression patterns., pp.  
35 419-444 in *Annu Rev Genet*.
- 36 Doi, S. A., 2014 Evidence synthesis for medical decision making and the appropriate use of  
37 quality scores. *Clin Med Res* 12: 40-46.
- 38 Donoho, D. M., Arian; Rahman, Inam; Shahram, Morteza; Stodden, Victoria, 2009 15 Years of  
39 Reproducible Research in Computational Harmonic Analysis. *Computing in Science and*  
40 *Engineering* 2009: 8-18.
- 41 dos Santos, G., A. J. Schroeder, J. L. Goodman, V. B. Strelets, M. A. Crosby *et al.*, 2015  
42 FlyBase: introduction of the *Drosophila melanogaster* Release 6 reference genome  
43 assembly and large-scale migration of genome annotations. *Nucleic Acids Research* 43:  
44 D690-D697.
- 45 Drager, A., and B. O. Palsson, 2014 Improving collaboration by standardization efforts in  
46 systems biology. *Front Bioeng Biotechnol* 2: 61.
- 47 Drummond, G. B., and S. L. Vowler, 2011 Show the data, don't conceal them. *Journal of*  
48 *Physiology-London* 589: 1861-1863.
- 49 Drummond, G. B., and S. L. Vowler, 2013 Statistical Reporting Guidelines. Type I: families,  
50 planning and errors. *Exp Physiol* 98: 3-6.

- 1 Dubruille, R. R., A. A. Murad, M. M. Rosbash and P. P. Emery, 2009 A constant light-genetic  
2 screen identifies KISMET as a regulator of circadian photoresponses. *Audio,*  
3 *Transactions of the IRE Professional Group on 5:* e1000787-e1000787.
- 4 Dumbell, R., O. Matveeva and H. Oster, 2016 *Circadian Clocks, Stress, and Immunity. Frontiers*  
5 *in Endocrinology* 7.
- 6 Edery, I., L. J. Zwiebel, M. E. Dembinska and M. Rosbash, 1994 Temporal phosphorylation of  
7 the *Drosophila* period protein., pp. 2260-2264 in *P Natl Acad Sci Usa*.
- 8 Edwards, A. W. F., 1992 *Likelihood*. John Hopkins University Press.
- 9 Efthimiou, O., T. P. Debray, G. van Valkenhoef, S. Trelle, K. Panayidou *et al.*, 2016 GetReal in  
10 network meta-analysis: a review of the methodology. *Res Synth Methods* 7: 236-263.
- 11 Ehlert, K., and L. Loewe, 2014 Lazy Updating of hubs can enable more realistic models by  
12 speeding up stochastic simulations. *J Chem Phys* 141: 204109.
- 13 Einstein, A., and A. Calaprice, 2011 *The ultimate quotable Einstein*. Princeton University Press,  
14 Princeton, N.J.
- 15 Ember, C., R. Hanisch, G. Alter, H. Berman, M. Hedstrom *et al.*, 2013 Sustaining Domain  
16 Repositories for Digital Data: A White Paper, pp.  
17 [http://datacommunity.icpsr.umich.edu/sites/default/files/WhitePaper\\_ICPSR\\_SDRDD\\_12](http://datacommunity.icpsr.umich.edu/sites/default/files/WhitePaper_ICPSR_SDRDD_121113.pdf)  
18 [1113.pdf](http://datacommunity.icpsr.umich.edu/sites/default/files/WhitePaper_ICPSR_SDRDD_121113.pdf) in *Workshop on Sustaining Domain Repositories for Digital Data, June 24-25,*  
19 *2013*, ICPSR, University of Michigan, Alfred P. Sloan Foundation.
- 20 Emery, P., W. V. So, M. Kaneko, J. C. Hall and M. Rosbash, 1998 CRY, a *Drosophila* clock and  
21 light-regulated cryptochrome, is a major contributor to circadian rhythm resetting and  
22 photosensitivity. *Cell* 95: 669-679.
- 23 Erguler, K., and M. P. Stumpf, 2011 Practical limits for reverse engineering of dynamical  
24 systems: a statistical analysis of sensitivity and parameter inferability in systems biology  
25 models. *Mol Biosyst* 7: 1593-1602.
- 26 Eyre-Walker, A., and P. D. Keightley, 2007 The distribution of fitness effects of new mutations.  
27 *Nat Rev Genet* 8: 610-618.
- 28 Fang, Y., S. Sathyanarayanan and A. Sehgal, 2007 Post-translational regulation of the  
29 *Drosophila* circadian clock requires protein phosphatase 1 (PP1). *Genes &*  
30 *development* 21: 1506-1518.
- 31 Fathallah-Shaykh, H. M., 2010 Dynamics of the *Drosophila* Circadian Clock: Theoretical Anti-  
32 Jitter Network and Controlled Chaos. *PLOS ONE* 5.
- 33 Fathallah-Shaykh, H. M., J. L. Bona and S. Kadener, 2009 Mathematical Model of the  
34 *Drosophila* Circadian Clock: Loop Regulation and Transcriptional Integration.  
35 *Biophysical Journal* 97: 2399-2408.
- 36 Foll, M., M. A. Beaumont and O. Gaggiotti, 2008 An approximate Bayesian computation  
37 approach to overcome biases that arise when using amplified fragment length  
38 polymorphism markers to study population structure. *Genetics* 179: 927-939.
- 39 Forger, D., M. Drapeau, B. Collins and J. Blau, 2005 A new model for circadian clock research?  
40 *Molecular systems biology* 1: 2005.0014.
- 41 Freedman, L. P., I. M. Cockburn and T. S. Simcoe, 2015a The economics of reproducibility in  
42 preclinical research. *PLOS Biol* 13: e1002165.
- 43 Freedman, L. P., M. C. Gibson, S. P. Ethier, H. R. Soule, R. M. Neve *et al.*, 2015b  
44 Reproducibility: changing the policies and culture of cell line authentication. *Nat Methods*  
45 12: 493-497.
- 46 Fryer, R. M., J. Randall, T. Yoshida, L. L. Hsiao, J. Blumenstock *et al.*, 2002 Global analysis of  
47 gene expression: Methods, interpretation, and pitfalls. *Experimental Nephrology* 10: 64-  
48 74.
- 49 Garbe, D. S., Y. Fang, X. Zheng, M. Sowcik, R. Anjum *et al.*, 2012 Cooperative interaction  
50 between phosphorylation sites on PERIOD maintains circadian period in *Drosophila*.  
51 *PLOS Genetics* 9: e1003749-e1003749.

- 1 Gekakis, N., L. Saez, A. M. Delahaye-Brown, M. P. Myers, A. Sehgal *et al.*, 1995 Isolation of  
2 timeless by PER protein interaction: defective interaction between timeless protein and  
3 long-period mutant PERL., pp. 811-815 in *Science*.
- 4 Gerard, C., D. Gonze and A. Goldbeter, 2009 Dependence of the period on the rate of protein  
5 degradation in minimal models for circadian oscillations. *Philosophical Transactions of*  
6 *the Royal Society A: Mathematical, Physical and Engineering Sciences* 367: 4665-4683.
- 7 Gibson, R., B. Alako, C. Amid, A. Cerdeno-Tarraga, I. Cleland *et al.*, 2016 Biocuration of  
8 functional annotation at the European nucleotide archive. *Nucleic Acids Res* 44: D58-66.
- 9 Gillespie, D. T., 1977 Exact Stochastic Simulation of Coupled Chemical-Reactions. *Abstracts of*  
10 *Papers of the American Chemical Society* 173: 128-128.
- 11 Gillespie, D. T., 2007 Stochastic simulation of chemical kinetics. *Annu Rev Phys Chem* 58: 35-  
12 55.
- 13 Gillespie, D. T., 2008 Simulation Methods in Systems Biology. *Formal Methods for*  
14 *Computational Systems Biology* 5016: 125-167.
- 15 Gillespie, D. T., A. Hellander and L. R. Petzold, 2013 Perspective: Stochastic algorithms for  
16 chemical kinetics. *Journal of Chemical Physics* 138: 170901.
- 17 Gilliland, G., S. Perrin, K. Blanchard and H. F. Bunn, 1990 Analysis of Cytokine Messenger-Rna  
18 and DNA - Detection and Quantitation by Competitive Polymerase Chain-Reaction.  
19 *Proceedings of the National Academy of Sciences of the United States of America* 87:  
20 2725-2729.
- 21 Gitelman, L., 2013 "*Raw data*" is an oxymoron. The MIT Press, Cambridge, Massachusetts ;  
22 London, England.
- 23 Glaser, F. T., and R. Stanewsky, 2005 Temperature synchronization of the Drosophila circadian  
24 clock. *Current biology : CB* 15: 1352-1363.
- 25 Gleeson, J. P., J. A. Ward, K. P. O'Sullivan and W. T. Lee, 2014 Competition-induced criticality  
26 in a model of meme popularity. *Phys Rev Lett* 112: 048701.
- 27 Glossop, N., J. Houl, H. Zheng, F. Ng, S. Dudek *et al.*, 2003 VRILLE feeds back to control  
28 circadian transcription of Clock in the Drosophila circadian oscillator. *Neuron* 37: 249-  
29 261.
- 30 Glynn, E. F., J. Chen and A. R. Mushegian, 2006 Detecting periodic patterns in unevenly  
31 spaced gene expression time series using Lomb-Scargle periodograms. *Bioinformatics*  
32 22: 310-316.
- 33 Godwin, A. R., S. Kojima, C. B. Green and J. Wilusz, 2013 Kiss your tail goodbye: The role of  
34 PARN, Nocturnin, and Angel deadenylases in mRNA biology. *Biochimica Et Biophysica*  
35 *Acta- Gene Regulatory Mechanisms* 1829: 571-579.
- 36 Goldbeter, A., 1995 A Model for Circadian Oscillations in the Drosophila Period Protein (Per).  
37 *Proceedings. Biological sciences / The Royal Society* 261: 319-324.
- 38 Goldbeter, A., 2002 Computational approaches to cellular rhythms. *Nature* 420: 238-245.
- 39 Goldston, D., 2008 Big data: Data wrangling. *Nature* 455: 15-15.
- 40 Gonze, D., 2011 Modeling circadian clocks: From equations to oscillations. *Central European*  
41 *Journal of Biology* 6: 699-711.
- 42 Gonze, D., J. Halloy and A. Goldbeter, 2002a Deterministic versus stochastic models for  
43 circadian rhythms. *Journal of Biological Physics* 28: 637-653.
- 44 Gonze, D., J. Halloy and A. Goldbeter, 2002b Robustness of circadian rhythms with respect to  
45 molecular noise. *Proceedings of the National Academy of Sciences of the United States*  
46 *of America* 99: 673-678.
- 47 Gonze, D., J. Halloy and A. Goldbeter, 2004 Emergence of coherent oscillations in stochastic  
48 models for circadian rhythms, pp. 221-233 in *Physica a-Statistical Mechanics and Its*  
49 *Applications*.

- 1 Gonze, D., J. Halloy, J.-C. Leloup and A. Goldbeter, 2003 Stochastic models for circadian  
2 rhythms: effect of molecular noise on periodic and chaotic behaviour. *Comptes Rendus*  
3 *Biologies* 326: 189-203.
- 4 Goodwin, B. C., 1964 A statistical mechanics of temporal organization in cells. *Symp Soc Exp*  
5 *Biol* 18: 301-326.
- 6 Goodwin, B. C., 1965 Oscillatory behavior in enzymatic control processes. *Adv Enzyme Regul*  
7 3: 425-438.
- 8 Gramates, L. S., S. J. Marygold, G. D. Santos, J. M. Urbano, G. Antonazzo *et al.*, 2016 FlyBase  
9 at 25: looking to the future. *Nucleic Acids Res*.
- 10 Gramates, L. S., S. J. Marygold, G. D. Santos, J. M. Urbano, G. Antonazzo *et al.*, 2017 FlyBase  
11 at 25: looking to the future. *Nucleic Acids Res* 45: D663-D671.
- 12 Green, C. B., N. Douris, S. Kojima, C. A. Strayer, J. Fogerty *et al.*, 2007 Loss of Nocturnin, a  
13 circadian deadenylase, confers resistance to hepatic steatosis and diet-induced obesity.  
14 *Proceedings of the National Academy of Sciences of the United States of America* 104:  
15 9888-9893.
- 16 Grima, B., A. Dognon, A. Lamouroux, E. Chélot and F. Rouyer, 2012 CULLIN-3 Controls  
17 TIMELESS Oscillations in the Drosophila Circadian Clock. *PLOS biology* 10: e1001367.
- 18 Grima, B., A. Lamouroux, E. Chélot, C. Papin, B. Limbourg-Bouchon *et al.*, 2002 The F-box  
19 protein Slimb controls the levels of clock proteins Period and Timeless. *Nature* 420: 178-  
20 182.
- 21 Grimes, M. L., W. J. Lee, L. Van der Maaten and P. Shannon, 2013 Wrangling  
22 Phosphoproteomic Data to Elucidate Cancer Signaling Pathways. *PLOS ONE* 8.
- 23 Grönke, S., I. Bickmeyer, R. Wunderlich, H. Jäckle and R. P. Kühnlein, 2009 Curled encodes  
24 the Drosophila homolog of the vertebrate circadian deadenylase Nocturnin., pp. 219-232  
25 in *Genetics*.
- 26 Grove, S. J., and N. E. Stork, 2000 An inordinate fondness for beetles. *Invertebrate Taxonomy*  
27 14: 733-739.
- 28 Grune, D. e. a., 2012 *Modern Compiler Design*. Springer Science+Business Media, New York,  
29 NY.
- 30 Haag-Liautard, C., M. Dorris, X. Maside, S. Macaskill, D. L. Halligan *et al.*, 2007 Direct  
31 estimation of per nucleotide and genomic deleterious mutation rates in Drosophila.  
32 *Nature* 445: 82-85.
- 33 Halsey, L. G., D. Curran-Everett, S. L. Vowler and G. B. Drummond, 2015 The fickle P value  
34 generates irreproducible results. *Nature Methods* 12: 179-185.
- 35 Hamblen, M. J. M., N. E. N. White, P. T. P. Emery, K. K. Kaiser and J. C. J. Hall, 1998  
36 Molecular and behavioral analysis of four period mutants in Drosophila melanogaster  
37 encompassing extreme short, novel long, and unorthodox arrhythmic types. *Genetics*  
38 149: 165-178.
- 39 Harbison, S. T., M. A. Carbone, J. F. Ayroles, E. A. Stone, R. F. Lyman *et al.*, 2009a Co-  
40 regulated transcriptional networks contribute to natural genetic variation in Drosophila  
41 sleep. *Nat Genet* 41: 371-375.
- 42 Harbison, S. T., T. F. Mackay and R. R. Anholt, 2009b Understanding the neurogenetics of  
43 sleep: progress from Drosophila. *Trends Genet* 25: 262-269.
- 44 Harbison, S. T., L. J. McCoy and T. F. Mackay, 2013 Genome-wide association study of sleep  
45 in Drosophila melanogaster. *BMC Genomics* 14: 281.
- 46 Hardin, P., and J. C. Hall, 1992 Circadian cycling in the levels of protein and mRNA from  
47 Drosophila melanogaster's period gene, pp. 155-169 in *Molecular Genetics of Biological*  
48 *Rhythms*, edited by M. W. Young.
- 49 Hardin, P. E., 1994 Analysis of period mRNA cycling in Drosophila head and body tissues  
50 indicates that body oscillators behave differently from head oscillators., pp. 7211-7218 in  
51 *Mol Cell Biol*.

- 1 Hardin, P. E., 2011 Molecular Genetic Analysis of Circadian Timekeeping in *Drosophila*, pp.  
2 141-173. Elsevier.
- 3 Hardin, P. E., J. C. Hall and M. Rosbash, 1990 Feedback of the *Drosophila* period gene product  
4 on circadian cycling of its messenger RNA levels. *Nature* 343: 536-540.
- 5 Hardin, P. E., J. C. Hall and M. Rosbash, 1992 Circadian oscillations in period gene mRNA  
6 levels are transcriptionally regulated., pp. 11711-11715 in *P Natl Acad Sci Usa*.
- 7 Harms, E., S. Kivimae, M. W. Young and L. Saez, 2004 Posttranscriptional and posttranslational  
8 regulation of clock genes. *Journal of Biological Rhythms* 19: 361-373.
- 9 Hazber, M. A. G., R. X. Li, X. W. Gu, G. D. Xu and Y. H. Li, 2015 Semantic SPARQL query in a  
10 relational database based on ontology construction. 2015 11th International Conference  
11 on Semantics, Knowledge and Grids (SkG): 25-32.
- 12 He, S., X. Zheng and D. Zeng, 2016 A Model-Free Scheme for Meme Ranking in Social Media.  
13 *Decis Support Syst* 81: 1-11.
- 14 Hermann-Luibl, C., T. Yoshii, P. R. Senthilan, H. Dirksen and C. Helfrich-Förster, 2014 The Ion  
15 Transport Peptide Is a New Functional Clock Neuropeptide in the Fruit Fly *Drosophila*  
16 *melanogaster*. *Journal of Neuroscience* 34: 9522-9536.
- 17 Heyde, C. C., 1997 *Quasi-likelihood and its application : a general approach to optimal*  
18 *parameter estimation*. Springer, New York.
- 19 Hirschman, L., G. A. Burns, M. Krallinger, C. Arighi, K. B. Cohen *et al.*, 2012 Text mining for the  
20 biocuration workflow. *Database (Oxford)* 2012: bas020.
- 21 Hoare, C. A. R., 2009 Null References: The Billion Dollar Mistake. Presentation at QCon 2009-  
22 08-25: [https://www.infoq.com/presentations/Null-References-The-Billion-Dollar-Mistake-](https://www.infoq.com/presentations/Null-References-The-Billion-Dollar-Mistake-Tony-Hoare)  
23 [Tony-Hoare](https://www.infoq.com/presentations/Null-References-The-Billion-Dollar-Mistake-Tony-Hoare) ; [https://www.lucidchart.com/techblog/2015/2008/2031/the-worst-mistake-of-](https://www.lucidchart.com/techblog/2015/2008/2031/the-worst-mistake-of-computer-science/)  
24 [computer-science/](https://www.lucidchart.com/techblog/2015/2008/2031/the-worst-mistake-of-computer-science/) ; [https://valbonne-consulting.com/computing-pioneers/tony-hoare-](https://valbonne-consulting.com/computing-pioneers/tony-hoare-1934/)  
25 [1934/](https://valbonne-consulting.com/computing-pioneers/tony-hoare-1934/)
- 26 Hodson, R., 2016 Precision medicine. *Nature* 537: S49.
- 27 Hoffmann, A. A., R. Hallas, C. Sinclair and L. Partridge, 2001 Rapid loss of stress resistance in  
28 *Drosophila melanogaster* under adaptation to laboratory culture. *Evolution* 55: 436-438.
- 29 Hong, C. I., and J. J. Tyson, 1997 A proposal for temperature compensation of the circadian  
30 rhythm in *Drosophila* based on dimerization of the PER protein. *Chronobiology*  
31 *International* 14: 521-529.
- 32 Howe, D., M. Costanzo, P. Fey, T. Gojobori, L. Hannick *et al.*, 2008 Big data: The future of  
33 biocuration. *Nature* 455: 47-50.
- 34 Huang, E. P., X. F. Wang, K. R. Choudhury, L. M. McShane, M. Gonen *et al.*, 2015 Meta-  
35 analysis of the technical performance of an imaging procedure: guidelines and statistical  
36 methodology. *Stat Methods Med Res* 24: 141-174.
- 37 Huang, Y., and R. Gottardo, 2013 Comparability and reproducibility of biomedical data. *Brief*  
38 *Bioinform* 14: 391-401.
- 39 Hucka, M., A. Finney, H. M. Sauro, H. Bolouri, J. C. Doyle *et al.*, 2003 The systems biology  
40 markup language (SBML): a medium for representation and exchange of biochemical  
41 network models. *Bioinformatics* 19: 524-531.
- 42 Hughes, M. E. M., G. R. G. Grant, C. C. Paquin, J. J. Qian and M. N. M. Nitabach, 2012 Deep  
43 sequencing the circadian and diurnal transcriptome of *Drosophila* brain. *Genes &*  
44 *development* 22: 1266-1281.
- 45 Hurley, J. M., J. J. Loros and J. C. Dunlap, 2016 The circadian system as an organizer of  
46 metabolism. *Fungal Genetics and Biology* 90: 39-43.
- 47 Hut, R. A., S. Paolucci, R. Dor, C. P. Kyriacou and S. Daan, 2013 Latitudinal clines: an  
48 evolutionary view on biological rhythms. *Proceedings of the Royal Society B-Biological*  
49 *Sciences* 280.
- 50 Ince, D. C., L. Hatton and J. Graham-Cumming, 2012 The case for open computer programs.  
51 *Nature* 482: 485-488.

- 1 loannidis, J. P., 2005a Molecular bias. *Eur J Epidemiol* 20: 739-745.
- 2 loannidis, J. P., 2005b Why most published research findings are false. *PLOS Med* 2: e124.
- 3 loannidis, J. P., D. B. Allison, C. A. Ball, I. Coulibaly, X. Cui *et al.*, 2009a Repeatability of  
4 published microarray gene expression analyses. *Nat Genet* 41: 149-155.
- 5 loannidis, J. P., G. Thomas and M. J. Daly, 2009b Validating, augmenting and refining genome-  
6 wide association signals. *Nat Rev Genet* 10: 318-329.
- 7 Ishikawa, T., A. Matsumoto, T. Kato, S. Togashi, H. Ryo *et al.*, 1999 DCRY is a *Drosophila*  
8 photoreceptor protein implicated in light entrainment of circadian rhythm., pp. 57-65 in  
9 *Genes Cells*.
- 10 Itoh, T. Q., T. Tanimura and A. Matsumoto, 2011 Membrane-bound transporter controls the  
11 circadian transcription of clock genes in *Drosophila*., pp. 1159-1167 in *Genes Cells*.
- 12 James, D., N. Wilkins-Diehr, V. Stodden, D. Colbry, C. Rosales *et al.*, 2015 Standing Together  
13 for Reproducibility in Large-Scale Computing: Report on reproducibility@XSEDE, pp.  
14 <http://arxiv.org/abs/1412.5557> in *Arxiv: Distributed, Parallel, and Cluster Computing*  
15 *(cs.DC)*, arXiv:1412.5557v2 [cs.DC].
- 16 Janes, A. A., and G. Succi, 2012 The dark side of agile software development, pp. 215-228 in  
17 *Proceedings of the ACM international symposium on New ideas, new paradigms, and*  
18 *reflections on programming and software*. ACM, Tucson, Arizona, USA.
- 19 Jang, A. R., K. Moravcevic, L. Saez, M. W. Young and A. Sehgal, 2015 *Drosophila* TIM binds  
20 importin alpha1, and acts as an adapter to transport PER to the nucleus. *PLOS Genet*  
21 11: e1004974.
- 22 Janssens, A. C., A. M. Gonzalez-Zuloeta Ladd, S. Lopez-Leon, J. P. loannidis, B. A. Oostra *et*  
23 *al.*, 2009 An empirical comparison of meta-analyses of published gene-disease  
24 associations versus consortium analyses. *Genet Med* 11: 153-162.
- 25 Jasny, B. R., G. Chin, L. Chong and S. Vignieri, 2011 Data replication & reproducibility. Again,  
26 and again, and again .... Introduction. *Science* 334: 1225.
- 27 Jaynes, E. T., and G. L. Bretthorst, 2003 *Probability theory : the logic of science*. Cambridge  
28 University Press, Cambridge, UK ; New York, NY.
- 29 Jin, L., 2011 A data-driven test to compare two or multiple time series. *Computational Statistics*  
30 *& Data Analysis* 55: 2183-2196.
- 31 Johnson, R. T., and K. Dickersin, 2007 Publication bias against negative results from clinical  
32 trials: three of the seven deadly sins. *Nature Clinical Practice Neurology* 3: 590-591.
- 33 Johnson, V. E., 2013 Revised standards for statistical evidence. *Proceedings of the National*  
34 *Academy of Sciences of the United States of America* 110: 19313-19317.
- 35 Jones, C. E., A. L. Brown and U. Baumann, 2007 Estimating the annotation error rate of curated  
36 GO database sequence annotations. *BMC Bioinformatics* 8: 170.
- 37 Jonquet, C., P. Lependu, S. Falconer, A. Coulet, N. F. Noy *et al.*, 2011 NCBO Resource Index:  
38 Ontology-Based Search and Mining of Biomedical Resources. *Web Semant* 9: 316-324.
- 39 Kadener, S., J. S. Menet, K. Sugino, M. D. Horwich, U. Weissbein *et al.*, 2009 A role for  
40 microRNAs in the *Drosophila* circadian clock. *Genes Development* 23: 2179-2191.
- 41 Kadener, S., D. Stoleru, M. McDonald, P. Nawathean and M. Rosbash, 2007 Clockwork Orange  
42 is a transcriptional repressor and a new *Drosophila* circadian pacemaker component.  
43 *Genes & development* 21: 1675-1686.
- 44 Kamp, P.-H., 2011 The most expensive one-byte mistake: Did Ken, Dennis, and Brian choose  
45 wrong with NUL-terminated text strings? *ACM Queue - The Bikeshed* 9: 1-4 ( comments  
46 at <http://queue.acm.org/detail.cfm?id=2010365> ).
- 47 Kannan, N. N., K. M. Vaze and V. K. Sharma, 2012 Clock accuracy and precision evolve as a  
48 consequence of selection for adult emergence in a narrow window of time in fruit flies  
49 *Drosophila melanogaster*., pp. 3527-3534 in *J Exp Biol*.
- 50 Karlebach, G., and R. Shamir, 2008 Modelling and analysis of gene regulatory networks. *Nature*  
51 *Reviews Molecular Cell Biology* 9: 770-780.

- 1 Karr, J. R., N. C. Phillips and M. W. Covert, 2014 WholeCellSimDB: a hybrid relational/HDF  
2 database for whole-cell model predictions. Database (Oxford) 2014.
- 3 Karr, J. R., J. C. Sanghvi, D. N. Macklin, A. Arora and M. W. Covert, 2013 WholeCellKB: model  
4 organism databases for comprehensive whole-cell models. Nucleic Acids Res 41: D787-  
5 792.
- 6 Karr, J. R., J. C. Sanghvi, D. N. Macklin, M. V. Gutschow, J. M. Jacobs *et al.*, 2012 A whole-cell  
7 computational model predicts phenotype from genotype. Cell 150: 389-401.
- 8 Karr, J. R., K. Takahashi and A. Funahashi, 2015a The principles of whole-cell modeling. Curr  
9 Opin Microbiol 27: 18-24.
- 10 Karr, J. R., A. H. Williams, J. D. Zucker, A. Raue, B. Steiert *et al.*, 2015b Summary of the  
11 DREAM8 Parameter Estimation Challenge: Toward Parameter Identification for Whole-  
12 Cell Models. PLOS Comput Biol 11: e1004096.
- 13 Katakura, Y., and H. Ohmori, 2006 Synchronized Control for Circadian Rhythm Based on the  
14 Central Clock Model of Drosophila. Audio, Transactions of the IRE Professional Group  
15 on: 2358-2361.
- 16 Keegan, K. P., S. Pradhan, J. P. Wang and R. Allada, 2007 Meta-analysis of Drosophila  
17 circadian microarray studies identifies a novel set of rhythmically expressed genes.  
18 PLOS Comput Biol 3: e208.
- 19 Keightley, P. D., U. Trivedi, M. Thomson, F. Oliver, S. Kumar *et al.*, 2009 Analysis of the  
20 genome sequences of three Drosophila melanogaster spontaneous mutation  
21 accumulation lines. Genome Res 19: 1195-1201.
- 22 Khodor, Y. L., J. Rodriguez, K. C. Abruzzi, C.-H. A. Tang, M. T. Marr *et al.*, 2011 Nascent-seq  
23 indicates widespread cotranscriptional pre-mRNA splicing in Drosophila. Genes &  
24 development 25: 2502-2512.
- 25 Kidd, P. B., M. W. Young and E. D. Siggia, 2015 Temperature compensation and temperature  
26 sensation in the circadian clock. Proc Natl Acad Sci U S A 112: E6284-6292.
- 27 Killeen, P. R., 2005 An alternative to null-hypothesis significance tests. Psychol Sci 16: 345-  
28 353.
- 29 Kim, E. Y., K. Bae, F. S. Ng, N. R. J. Glossop, P. E. Hardin *et al.*, 2002 Drosophila CLOCK  
30 protein is under posttranscriptional control and influences light-induced activity., pp. 69-  
31 81 in *Neuron*.
- 32 Kim, E. Y., H. W. Ko, W. Yu, P. E. Hardin and I. Edery, 2007 A DOUBLETIME kinase binding  
33 domain on the Drosophila PERIOD protein is essential for its hyperphosphorylation,  
34 transcriptional repression, and circadian clock function. Molecular and cellular biology  
35 27: 5014-5028.
- 36 Kim, S., R. I. Dogan, A. Chatr-Aryamontri, C. S. Chang, R. Oughtred *et al.*, 2016 BioCreative V  
37 BioC track overview: collaborative biocurator assistant task for BioGRID. Database-the  
38 Journal of Biological Databases and Curation.
- 39 Kim, Y. M., J. Choi, H. Y. Lee, G. W. Lee, Y. H. Lee *et al.*, 2014 dbCRY: a Web-based  
40 comparative and evolutionary genomics platform for blue-light receptors. Database  
41 (Oxford) 2014: bau037.
- 42 Kimura, M., 1962 On the probability of fixation of mutant genes in a population. Genetics 47:  
43 713-719.
- 44 Kirk, P. D., A. C. Babbie and M. P. Stumpf, 2015 Systems biology (un)certainties. Science 350:  
45 386-388.
- 46 Kivimäe, S., L. Saez and M. W. Young, 2008 Activating PER repressor through a DBT-directed  
47 phosphorylation switch. PLOS biology 6: e183.
- 48 Kloss, B., J. L. Price, L. Saez, J. Blau, A. Rothenfluh *et al.*, 1998 The Drosophila clock gene  
49 double-time encodes a protein closely related to human casein kinase Iε. Cell 94:  
50 97-107.



- 1 Kloss, B. B., A. A. Rothenfluh, M. W. M. Young and L. L. Saez, 2001 Phosphorylation of  
2 PERIOD Is Influenced by Cycling Physical Associations of DOUBLE-TIME, PERIOD,  
3 and TIMELESS in the *Drosophila* Clock. *Neuron* 30: 8-8.
- 4 Knowles, A., K. Koh, J.-T. Wu, C.-T. Chien, D. A. Chamovitz *et al.*, 2009 The COP9  
5 Signalosome Is Required for Light-Dependent Timeless Degradation and *Drosophila*  
6 Clock Resetting. *Journal of Neuroscience* 29: 1152-1162.
- 7 Knuth, D. E., 1974 Structured programming with go to statements. *Computing Surveys* 6: 261-  
8 301.
- 9 Ko, H. W., J. Jiang and I. Edery, 2002 Role for Slimb in the degradation of *Drosophila* Period  
10 protein phosphorylated by Doubletime. *Nature* 420: 673-678.
- 11 Ko, H. W., E. Y. Kim, J. Chiu, J. T. Vanselow, A. Kramer *et al.*, 2010 A hierarchical  
12 phosphorylation cascade that regulates the timing of PERIOD nuclear entry reveals  
13 novel roles for proline-directed kinases and GSK-3 $\beta$ /SGG in circadian clocks. *Journal*  
14 *of Neuroscience* 30: 12664-12675.
- 15 Koh, K., X. Zheng and A. Sehgal, 2006 JETLAG resets the *Drosophila* circadian clock by  
16 promoting light-induced degradation of TIMELESS. *Science* 312: 1809-1812.
- 17 Konopka, R. J., and S. Benzer, 1971 Clock mutants of *Drosophila melanogaster*., pp. 2112-  
18 2116 in *P Natl Acad Sci Usa*.
- 19 Koskinen, P., P. Toronen, J. Nokso-Koivisto and L. Holm, 2015 PANNZER: high-throughput  
20 functional annotation of uncharacterized proteins in an error-prone environment.  
21 *Bioinformatics* 31: 1544-1552.
- 22 Kotsifakos, A., V. Athitsos and P. Papapetrou, 2016 Query-sensitive distance measure selection  
23 for time series nearest neighbor classification. *Intelligent Data Analysis* 20: 5-27.
- 24 Kraft, P., E. Zeggini and J. P. Ioannidis, 2009 Replication in genome-wide association studies.  
25 *Stat Sci* 24: 561-573.
- 26 Krause, F., J. Uhlendorf, T. Lubitz, M. Schulz, E. Klipp *et al.*, 2010 Annotation and merging of  
27 SBML models with semanticSBML. *Bioinformatics* 26: 421-422.
- 28 Krishnamurthy, B., W. Willinger, P. Gill and M. Arlitt, 2011 A Socratic method for validation of  
29 measurement-based networking research. *Computer Communications* 34: 43-53.
- 30 Kuczenski, R. S., K. C. Hong, J. Garcia-Ojalvo and K. H. Lee, 2007 PERIOD-TIMELESS  
31 interval timer may require an additional feedback loop., pp. e154 in *PLOS Comput Biol*.
- 32 Kula-Eversole, E., E. Nagoshi, Y. Shang, J. Rodriguez, R. Allada *et al.*, 2010 Surprising gene  
33 expression patterns within and between PDF-containing circadian neurons in  
34 *Drosophila*. *Proceedings of the National Academy of Sciences of the United States of*  
35 *America* 107: 13497-13502.
- 36 Kulasiri, D., and Z. Xie, 2008 Modelling Circadian Rhythms in *Drosophila* and Investigation of  
37 VRI and PDP1 Feedback Loops Using a New Mathematical Model. *Mathematical*  
38 *Modelling of Natural Phenomena* 3: 1-26.
- 39 Kumar, S. S., D. D. Chen and A. A. Sehgal, 2012 Dopamine acts through Cryptochrome to  
40 promote acute arousal in *Drosophila*. *Genes & development* 26: 1224-1234.
- 41 Kurata, H., T. Tanaka and F. Ohnishi, 2007 Mathematical identification of critical reactions in the  
42 interlocked feedback model. *PLOS ONE* 2: e1103-e1103.
- 43 Kurosawa, G., A. Mochizuki and Y. Iwasa, 2002 Comparative study of circadian clock models, in  
44 search of processes promoting oscillation. *Journal of theoretical biology* 216: 193-208.
- 45 Kurtz, T. G., 1972 Relationship between Stochastic and Deterministic Models for Chemical  
46 Reactions. *Journal of Chemical Physics* 57: 2976-&.
- 47 Kyriacou, C. P., A. A. Peixoto and R. Costa, 2007 A cline in the *Drosophila melanogaster* period  
48 gene in Australia: neither down nor under. *Journal of Evolutionary Biology* 20: 1649-  
49 1651.
- 50 Kyriacou, C. P., A. A. Peixoto, F. Sandrelli, R. Costa and E. Tauber, 2008 Clines in clock genes:  
51 fine-tuning circadian rhythms to the environment. *Trends in Genetics* 24: 124-132.

- 1 Lachance, J., and S. A. Tishkoff, 2013 SNP ascertainment bias in population genetic analyses:  
2 why it is important, and how to correct it. *Bioessays* 35: 780-786.
- 3 Laibe, C., and N. Le Novere, 2007 MIRIAM Resources: tools to generate and resolve robust  
4 cross-references in Systems Biology. *BMC Syst Biol* 1: 58.
- 5 Lamaze, A. A., A. A. Lamouroux, C. C. Vias, H.-C. H. Hung, F. F. Weber *et al.*, 2011 The E3  
6 ubiquitin ligase CTRIP controls CLOCK levels and PERIOD oscillations in *Drosophila*.  
7 *EMBO Reports* 12: 549-557.
- 8 Lamba, P., D. Bilodeau-Wentworth, P. Emery and Y. Zhang, 2014 Morning and Evening  
9 Oscillators Cooperate to Reset Circadian Behavior in Response to Light Input.  
10 *CellReports* 7: 601-608.
- 11 Lander, E. S., L. M. Linton, B. Birren, C. Nusbaum, M. C. Zody *et al.*, 2001 Initial sequencing  
12 and analysis of the human genome. *Nature* 409: 860-921.
- 13 Law, A. M., and W. D. Kelton, 2000 *Simulation modeling and analysis*. McGraw-Hill, Boston.
- 14 Le Novere, N., 2015 Quantitative and logic modelling of molecular and gene networks. *Nat Rev*  
15 *Genet* 16: 146-158.
- 16 Le Novere, N., B. Bornstein, A. Broicher, M. Courtot, M. Donizelli *et al.*, 2006 BioModels  
17 Database: a free, centralized database of curated, published, quantitative kinetic models  
18 of biochemical and cellular systems. *Nucleic Acids Res* 34: D689-691.
- 19 Le Novere, N., M. Hucka, H. Mi, S. Moodie, F. Schreiber *et al.*, 2009 The Systems Biology  
20 Graphical Notation. *Nature Biotechnology* 27: 735-741.
- 21 Lear, B. C., L. Zhang and R. Allada, 2009 The neuropeptide PDF acts directly on evening  
22 pacemaker neurons to regulate multiple features of circadian behavior. *PLOS biology* 7:  
23 e1000154-e1000154.
- 24 Lebiecz, D., M. Rehberg and D. Skanda, 2012 Robust optimal design of synthetic biological  
25 networks. *Methods Mol Biol* 813: 45-55.
- 26 Lee, C., K. Bae and I. Edery, 1998 The *Drosophila* CLOCK protein undergoes daily rhythms in  
27 abundance, phosphorylation, and interactions with the PER-TIM complex. *Neuron* 21:  
28 857-867.
- 29 Lee, C., K. Bae and I. Edery, 1999 PER and TIM inhibit the DNA binding activity of a *Drosophila*  
30 CLOCK-CYC/dBMAL1 heterodimer without disrupting formation of the heterodimer: a  
31 basis for circadian transcription., pp. 5316-5325 in *Mol Cell Biol*.
- 32 Lee, E., E. H. Jeong, H.-J. Jeong, E. Yildirim, J. T. Vanselow *et al.*, 2014a Phosphorylation of a  
33 Central Clock Transcription Factor Is Required for Thermal but Not Photic Entrainment.  
34 *PLOS Genetics* 10: e1004545.
- 35 Lee, R., J. R. Karr and M. W. Covert, 2013 WholeCellViz: data visualization for whole-cell  
36 models. *BMC Bioinformatics* 14: 253.
- 37 Lee, X. J., C. C. Drovandi and A. N. Pettitt, 2014b Model choice problems using approximate  
38 Bayesian computation with applications to pathogen transmission data sets. *Biometrics*.
- 39 Leek, J. T., and R. D. Peng, 2015 Statistics: P values are just the tip of the iceberg. *Nature* 520:  
40 612.
- 41 Leise, T. L., and E. E. Moin, 2007 A mathematical model of the *Drosophila* circadian clock with  
42 emphasis on posttranslational mechanisms. *Journal of theoretical biology* 248: 48-63.
- 43 Lejaeghere, K., G. Bihlmayer, T. Bjorkman, P. Blaha, S. Blugel *et al.*, 2016 Reproducibility in  
44 density functional theory calculations of solids. *Science* 351: aad3000.
- 45 Leloup, J.-C., 2009 Circadian clocks and phosphorylation: Insights from computational  
46 modeling. *Central European Journal of Biology* 4: 290-303.
- 47 Leloup, J. C., and A. Goldbeter, 1997 Temperature compensation of circadian rhythms: Control  
48 of the period in a model for circadian oscillations of the per protein in *Drosophila*.  
49 *Chronobiology International* 14: 511-520.

- 1 Leloup, J. C., and A. Goldbeter, 1998a A model for circadian rhythms in *Drosophila*  
2 incorporating the formation of a complex between the PER and TIM proteins. *Journal of*  
3 *biological rhythms* 13: 70-87.
- 4 Leloup, J. C., and A. Goldbeter, 1998b Modeling circadian oscillations of the PER and TIM  
5 proteins in *Drosophila*. *Biological Clocks* 1152: 81-88.
- 6 Leloup, J. C., and A. Goldbeter, 2000 Modeling the molecular regulatory mechanism of  
7 circadian rhythms in *Drosophila*. *Bioessays* 22: 84-93.
- 8 Leloup, J. C., and A. Goldbeter, 2001 A molecular explanation for the long-term suppression of  
9 circadian rhythms by a single light pulse., pp. R1206-1212 in *Am J Physiol Regul Integr*  
10 *Comp Physiol*.
- 11 Leming, M. T., S. S. Rund, S. K. Behura, G. E. Duffield and J. E. O'Tousa, 2014 A database of  
12 circadian and diel rhythmic gene expression in the yellow fever mosquito *Aedes aegypti*.  
13 *BMC Genomics* 15: 1128.
- 14 Lerner, I., O. Bartok, V. Wolfson, J. S. Menet, U. Weissbein *et al.*, 2015 Clk post-transcriptional  
15 control denoises circadian transcription both temporally and spatially. *Nat Commun* 6:  
16 7056.
- 17 Leroi, A. M., A. K. Chippindale and M. R. Rose, 1994 Long-term laboratory evolution of a  
18 genetic life-history trade-off in *Drosophila melanogaster*. 1. The role of genotype-by-  
19 environment interaction. *Evolution* 48: 1244-1257.
- 20 Leugering, G. n., 2012 *Constrained optimization and optimal control for partial differential*  
21 *equations*. Birkhäuser, Basel Switzerland ; New York.
- 22 Lew, M. J., 2012 Bad statistical practice in pharmacology (and other basic biomedical  
23 disciplines): you probably don't know P. *British Journal of Pharmacology* 166: 1559-  
24 1567.
- 25 Lewis, J., C. E. Breeze, J. Charlesworth, O. J. Maclaren and J. Cooper, 2016 Where next for the  
26 reproducibility agenda in computational biology? *BMC Syst Biol* 10: 52.
- 27 Li, Q., and X. Lang, 2008 Internal noise-sustained circadian rhythms in a *Drosophila* model., pp.  
28 1983-1994 in *Biophys J*.
- 29 Li, S., K. Shui, Y. Zhang, Y. Lv, W. Deng *et al.*, 2017 CGDB: a database of circadian genes in  
30 eukaryotes. *Nucleic Acids Res* 45: D397-D403.
- 31 Li, Y., and M. Rosbash, 2013 Accelerated degradation of perS protein provides insight into light-  
32 mediated phase shifting., pp. 171-182 in *J Biol Rhythms*.
- 33 Lim, C., B. Y. Chung, J. L. Pitman, J. J. McGill, S. Pradhan *et al.*, 2007 clockwork orange  
34 encodes a transcriptional repressor important for circadian-clock amplitude in  
35 *Drosophila*. *Current biology : CB* 17: 1082-1089.
- 36 Lim, C., J. Lee, C. Choi, V. L. Kilman, J. Kim *et al.*, 2011 The novel gene twenty-four defines a  
37 critical translational step in the *Drosophila* clock., pp. 399-403 in *Nature*.
- 38 Lin, J.-M., V. L. Kilman, K. Keegan, B. Paddock, M. Emery-Le *et al.*, 2002a A role for casein  
39 kinase 2alpha in the *Drosophila* circadian clock. *Nature* 420: 816-820.
- 40 Lin, J.-M., A. Schroeder and R. Allada, 2005 In vivo circadian function of casein kinase 2  
41 phosphorylation sites in *Drosophila* PERIOD. *Journal of Neuroscience* 25: 11175-11183.
- 42 Lin, Y., M. Han, B. Shimada, L. Wang, T. M. Gibler *et al.*, 2002b Influence of the period-  
43 dependent circadian clock on diurnal, circadian, and aperiodic gene expression in  
44 *Drosophila melanogaster*. *Proceedings of the National Academy of Sciences of the*  
45 *United States of America* 99: 9562-9567.
- 46 Linné, C. v., 1758 *Caroli Linnæi ... Systema naturæ per regna tria naturæ, secundum classes,*  
47 *ordines, genera, species, cum characteribus, differentiis, synonymis, locis.* impensis L.  
48 *Salvii, Holmiæ.*
- 49 Loewe, L., 2002 Global computing for bioinformatics. *Briefings in Bioinformatics* 3: 377-388.
- 50 Loewe, L., 2007 Evolution@home: observations on participant choice, work unit variation and  
51 low-effort global computing. *Software Practice & Experience* 37: 1289-1318.

- 1 Loewe, L., 2009 A framework for evolutionary systems biology. *BMC Systems Biology* 3: 27.
- 2 Loewe, L., 2012 How evolutionary systems biology will help understand adaptive landscapes  
3 and distributions of mutational effects, pp. 399-410 in *Evolutionary Systems Biology*,  
4 edited by O. Soyer. Springer, New York, NY.
- 5 Loewe, L., 2016 Systems in Evolutionary System Biology. *Encyclopedia of Evolutionary Biology*  
6 ed. 1, vol. 4: 297-318 ([http://evolutionarysystemsbiology.org/pdf/Loewe-2016-](http://evolutionarysystemsbiology.org/pdf/Loewe-2016-evosysbio.pdf)  
7 [evosysbio.pdf](http://evolutionarysystemsbiology.org/pdf/Loewe-2016-evosysbio.pdf)).
- 8 Loewe, L., and J. Hillston, 2008 The distribution of mutational effects on fitness in a simple  
9 circadian clock. *Lecture Notes in Bioinformatics* 5307: 156-175.
- 10 Loewe, L., and S. Keel, 2014 BEST Names for Semantic Units to Support Reproducible  
11 Modeling, pp. 4 pages,  
12 [https://www.xsede.org/documents/659353/703287/xsede659314\\_loewe.pdf](https://www.xsede.org/documents/659353/703287/xsede659314_loewe.pdf) in *2014-07-*  
13 *14 Workshop: "reproducibility@XSEDE", XSEDE14 Annual Conference* (  
14 <https://www.xsede.org/web/reproducibility> ), Atlanta, GA, USA. .
- 15 Loewe, L., S. Moodie and J. Hillston, 2009a Quantifying the implicit process flow abstraction in  
16 SBGN-PD diagrams with Bio-PEPA. *EPTCS* 6: 93-107 <http://arxiv.org/abs/0910.1410>.
- 17 Loewe, L., S. Moodie and J. Hillston, 2009b Technical Report: Defining a textual representation  
18 for SBGN Process Diagrams and translating it to Bio-PEPA for quantitative analysis of  
19 the MAPK signal transduction cascade. Technical Report, School for Informatics,  
20 University of Edinburgh EDI-INF-RR-1334:  
21 <http://www.inf.ed.ac.uk/publications/report/1334.html>
- 22 Loewe, L., K. S. Scheuer and S. Keel, 2016 Evolvix Concept: BEST Names for Semantic Units  
23 Increase Semantic Reproducibility and Help Combine Complex Biological Models, pp.  
24 <https://sites.google.com/site/dslabhs2016/proceeding-papers> in *Workshop on Data*  
25 *Science, Learning, and Applications to Biomedical & Health Sciences, January 7 - 8,*  
26 *2016*. NY Academy of Sciences, New York Academy of Sciences.
- 27 Loewe, L., K. S. Scheuer, S. A. Keel, V. Vyas, B. Liblit *et al.*, 2017 Evolvix BEST Names for  
28 semantic reproducibility across code2brain interfaces; with 74 pages online material at  
29 <http://dx.doi.org/10.1111/nyas.13192> and updates at <http://evolvix.org/naming> ;  
30 <http://evolvix.org/post>. *Annals of the New York Academy of Sciences* 1387: 124-144.
- 31 Loftus, G. R., 1993 A Picture Is Worth 1000 P-Values - on the Irrelevance of Hypothesis-Testing  
32 in the Microcomputer Age. *Behavior Research Methods Instruments & Computers* 25:  
33 250-256.
- 34 Long, D. M., M. R. Blake, S. Dutta, S. D. Holbrook, J. Kotwica-Rolinska *et al.*, 2014  
35 Relationships between the circadian system and Alzheimer's disease-like symptoms in  
36 *Drosophila*. *PLOS ONE* 9: e106068.
- 37 Lopes, R. d. S., N. M. Resende, A. C. Honorio-Franca and E. L. Franca, 2013 Application of  
38 bioinformatics in chronobiology research. *ScientificWorldJournal* 2013: 153839.
- 39 Lorenz, L. J., J. C. Hall and M. Rosbash, 1989 Expression of a *Drosophila* mRNA is under  
40 circadian clock control during pupation., pp. 869-880 in *Development*.
- 41 Lorsch, J. R., F. S. Collins and J. Lippincott-Schwartz, 2014 Cell Biology. Fixing problems with  
42 cell lines. *Science* 346: 1452-1453.
- 43 Lowrey, P. L., and J. S. Takahashi, 2004 Mammalian circadian biology: elucidating genome-  
44 wide levels of temporal organization. *Annu Rev Genomics Hum Genet* 5: 407-441.
- 45 Lynch, A., G. M. Plunkett, A. J. Baker and P. F. Jenkins, 1989 A Model of Cultural-Evolution of  
46 Chaffinch Song Derived with the Meme Concept. *American Naturalist* 133: 634-653.
- 47 Lynch, M., M. C. Field, H. V. Goodson, H. S. Malik, J. B. Pereira-Leal *et al.*, 2014 Evolutionary  
48 cell biology: Two origins, one objective. *Proceedings of the National Academy of*  
49 *Sciences of the United States of America* 111: 16990-16994.
- 50 Ma, L., J. Ma and K. Xu, 2015 Effect of Spaceflight on the Circadian Rhythm, Lifespan and  
51 Gene Expression of *Drosophila melanogaster*., pp. e0121600 in *PLOS ONE*.

- 1 Mackay, T. F., S. Richards, E. A. Stone, A. Barbadilla, J. F. Ayroles *et al.*, 2012 The *Drosophila*  
2 *melanogaster* Genetic Reference Panel. *Nature* 482: 173-178.
- 3 Macneil, L. T., and A. J. Walhout, 2011 Gene regulatory networks and the role of robustness  
4 and stochasticity in the control of gene expression. *Genome Res* 21: 645-657.
- 5 Mahmood, Z., 2016 *Data science and big data computing : frameworks and methodologies*.  
6 Springer Berlin Heidelberg, New York, NY.
- 7 Majercak, J., W.-F. Chen and I. Edery, 2004 Splicing of the period gene 3'-terminal intron  
8 is regulated by light, circadian clock factors, and phospholipase C., pp. 3359-3372 in *Mol*  
9 *Cell Biol.*
- 10 Majercak, J., D. Kalderon and I. Edery, 1997 *Drosophila melanogaster* deficient in protein  
11 kinase A manifests behavior-specific arrhythmia but normal clock function.
- 12 Majercak, J., D. Sidote, P. E. Hardin and I. Edery, 1999 How a circadian clock adapts to  
13 seasonal decreases in temperature and day length., pp. 219-230 in *Neuron*.
- 14 Major, P., B. J. Kostrewski and J. Anderson, 1978 Analysis of the semantic structures of  
15 medical reference languages: part 2. Analysis of the semantic power of MeSH, ICD and  
16 SNOMED. *Med Inform (Lond)* 3: 269-281.
- 17 Malinen, E., A. Kassinen, T. Rinttila and A. Palva, 2003 Comparison of real-time PCR with  
18 SYBR Green I or 5'-nuclease assays and dot-blot hybridization with rDNA-targeted  
19 oligonucleotide probes in quantification of selected faecal bacteria. *Microbiology* 149:  
20 269-277.
- 21 Mandrioli, D., and M. Pradella, 2015 Programming Languages shouldn't be "too Natural". *ACM*  
22 *SIGSOFT Software Engineering Notes* 40: 1--4.
- 23 Marrus, S. B., H. Zeng and M. Rosbash, 1996 Effect of constant light and circadian entrainment  
24 of *perS* flies: evidence for light-mediated delay of the negative feedback loop in  
25 *Drosophila*. *EMBO Journal* 15: 6877-6886.
- 26 Martinek, S., S. Inonog, A. S. Manoukian and M. W. Young, 2001 A role for the segment polarity  
27 gene shaggy/GSK-3 in the *Drosophila* circadian clock. *Cell* 105: 769-779.
- 28 Marygold, S. J., M. A. Crosby, J. L. Goodman and C. FlyBase, 2016 Using FlyBase, a Database  
29 of *Drosophila* Genes and Genomes. *Methods Mol Biol* 1478: 1-31.
- 30 Masri, S., K. Kinouchi and P. Sassone-Corsi, 2015 Circadian clocks, epigenetics, and cancer.  
31 *Current Opinion in Oncology* 27: 50-56.
- 32 Matsumoto, A., M. Ukai-Tadenuma, R. G. Yamada, J. Houl, K. D. Uno *et al.*, 2007 A functional  
33 genomics strategy reveals clockwork orange as a transcriptional regulator in the  
34 *Drosophila* circadian clock. *Genes & development* 21: 1687-1700.
- 35 Mavelli, F., 2012 Stochastic simulations of minimal cells: the Ribocell model. *BMC*  
36 *Bioinformatics* 13 Suppl 4: S10.
- 37 Mazumdar, M., S. Banerjee and H. L. Van Epps, 2010 Improved reporting of statistical design  
38 and analysis: guidelines, education, and editorial policies. *Methods Mol Biol* 620: 563-  
39 598.
- 40 McCallum, Q. E., 2013 *Bad Data Handbook: Mapping the world of data problems*. O'Reilly,  
41 Sebastopol, CA.
- 42 McClung, C. A., 2013 How Might Circadian Rhythms Control Mood? Let Me Count the Ways.....  
43 *Biological Psychiatry*.
- 44 McDonald, M. J., and M. Rosbash, 2001 Microarray analysis and organization of circadian gene  
45 expression in *Drosophila*. *Cell* 107: 567-578.
- 46 McDonald, M. J., M. Rosbash and P. Emery, 2001 Wild-type circadian rhythmicity is dependent  
47 on closely spaced E boxes in the *Drosophila* timeless promoter. *Mol Cell Biol* 21: 1207-  
48 1217.
- 49 McIntyre, L. M., K. K. Lopiano, A. M. Morse, V. Amin, A. L. Oberg *et al.*, 2011 RNA-seq:  
50 technical variability and sampling. *Bmc Genomics* 12.

- 1 McKenzie, J. E., G. Salanti, S. C. Lewis and D. G. Altman, 2013 Meta-analysis and The  
2 Cochrane Collaboration: 20 years of the Cochrane Statistical Methods Group. *Syst Rev*  
3 2: 80.
- 4 McNutt, M., 2014 Journals unite for reproducibility. *Science* 346: 679.
- 5 Meissner, R.-A., V. L. Kilman, J.-M. Lin and R. Allada, 2008 TIMELESS is an important mediator  
6 of CK2 effects on circadian clock function in vivo. *Journal of Neuroscience* 28: 9732-  
7 9740.
- 8 Menet, J. S., K. C. Abruzzi, J. Desrochers, J. Rodriguez and M. Rosbash, 2010 Dynamic PER  
9 repression mechanisms in the *Drosophila* circadian clock: from on-DNA to off-DNA.  
10 *Genes & development* 24: 358-367.
- 11 Merbitz-Zahradnik, T., and E. Wolf, 2015 How is the inner circadian clock controlled by  
12 interactive clock proteins?: Structural analysis of clock proteins elucidates their  
13 physiological role. *FEBS Lett* 589: 1516-1529.
- 14 Merrill, G. H., 2009 Concepts and synonymy in the UMLS Metathesaurus. *J Biomed Discov*  
15 *Collab* 4: 7.
- 16 Mesnard, O., and L. A. Barba, 2016 Reproducible and replicable CFD: it's harder than you think.  
17 *Computing in Science and Engineering*: <https://arxiv.org/abs/1605.04339>.
- 18 Mezan, S., R. Ashwal-Fluss, R. Shenhav, M. Garber and S. Kadener, 2013 Genome-wide  
19 assessment of post-transcriptional control in the fly brain., pp. 49 in *Front Mol Neurosci*.
- 20 Millis, S. R., 2003 Statistical practices: The seven deadly sins. *Child Neuropsychology* 9: 221-  
21 233.
- 22 Minikel, E. V., I. Zerr, S. J. Collins, C. Ponto, A. Boyd *et al.*, 2014 Ascertainment bias causes  
23 false signal of anticipation in genetic prion disease. *Am J Hum Genet* 95: 371-382.
- 24 Mitchell, C. S., A. Cates, R. B. Kim and S. K. Hollinger, 2015 Undergraduate Biocuration:  
25 Developing Tomorrow's Researchers While Mining Today's Data. *J Undergrad Neurosci*  
26 *Educ* 14: A56-65.
- 27 Mitra, K., A. R. Carvunis, S. K. Ramesh and T. Ideker, 2013 Integrative approaches for finding  
28 modular structure in biological networks. *Nature Reviews Genetics* 14: 719-732.
- 29 Miura, S., T. Shimokawa and T. Nomura, 2008 Stochastic simulations on a model of circadian  
30 rhythm generation. *Bio Systems* 93: 133-140.
- 31 Mobley, A., S. K. Linder, R. Braeuer, L. M. Ellis and L. Zwelling, 2013 A Survey on Data  
32 Reproducibility in Cancer Research Provides Insights into Our Limited Ability to  
33 Translate Findings from the Laboratory to the Clinic. *PLOS ONE* 8.
- 34 Mockler, T. C., T. P. Michael, H. D. Priest, R. Shen, C. M. Sullivan *et al.*, 2007 The DIURNAL  
35 project: DIURNAL and circadian expression profiling, model-based pattern matching,  
36 and promoter analysis. *Cold Spring Harb Symp Quant Biol* 72: 353-363.
- 37 Molina-Rodríguez, M., and V. Álvarez, 2016 Los ritmos circadianos en cancer y la cronoterapia.  
38 *Iatreia* 29.3: 301.
- 39 Moodie, S., S. Moodie, N. Le Novere, E. Demir, H. Mi *et al.*, 2011 Systems Biology Graphical  
40 Notation: Process Description language Level 1. *Nature Precedings*.
- 41 Mori, U., A. Mendiburu and J. A. Lozano, 2016 Similarity Measure Selection for Clustering Time  
42 Series Databases. *Ieee Transactions on Knowledge and Data Engineering* 28: 181-195.
- 43 Mortazavi, A., B. A. Williams, K. Mccue, L. Schaeffer and B. Wold, 2008 Mapping and  
44 quantifying mammalian transcriptomes by RNA-Seq. *Nature Methods* 5: 621-628.
- 45 Moura Neto, F. D., and A. n. J. Silva Neto, 2013 *An introduction to inverse problems with*  
46 *applications*. Springer, Heidelberg ; New York.
- 47 Murtaugh, P. A., 2014 In defense of P values. *Ecology* 95: 611-617.
- 48 Musen, M. A., N. F. Noy, N. H. Shah, P. L. Whetzel, C. G. Chute *et al.*, 2012 The National  
49 Center for Biomedical Ontology. *J Am Med Inform Assoc* 19: 190-195.

- 1 Muskus, M. J., F. Preuss, J.-Y. Fan, E. S. Bjes and J. L. Price, 2007 *Drosophila* DBT lacking  
2 protein kinase activity produces long-period and arrhythmic circadian behavioral and  
3 molecular rhythms., pp. 8049-8064 in *Mol Cell Biol*.
- 4 Myers, M. P., K. Wager-Smith, A. Rothenfluh-Hilfiker and M. W. Young, 1996 Light-Induced  
5 Degradation of TIMELESS and Entrainment of the *Drosophila* Circadian Clock. *Science*,  
6 New Series 271: 1736-1740.
- 7 Nagoshi, E., K. Sugino, E. Kula, E. Okazaki, T. Tachibana *et al.*, 2010 Dissecting differential  
8 gene expression within the circadian neuronal circuit of *Drosophila*., pp. 60-68 in *Nat*  
9 *Neurosci*.
- 10 Naidoo, N., W. Song, M. Hunter-Ensor and A. Sehgal, 1999 A role for the proteasome in the  
11 light response of the timeless clock protein. *Science* 285: 1737-1741.
- 12 Najafi, A., G. Bidkhori, J. H. Bozorgmehr, I. Koch and A. Masoudi-Nejad, 2014 Genome scale  
13 modeling in systems biology: algorithms and resources. *Curr Genomics* 15: 130-159.
- 14 Nakagawa, S., and I. C. Cuthill, 2007 Effect size, confidence interval and statistical significance:  
15 a practical guide for biologists. *Biological Reviews* 82: 591-605.
- 16 NASA, F. Chandler, T., Y. H. Chang, James, A. Mosleh, J. Marble, L. *et al.*, 2006-07 *Human*  
17 *Reliability Analysis Methods Selection Guidance for NASA*. NASA/OSMA, NASA,  
18 Washington, DC.
- 19 NASA, K. Leiden, K. R. Laughery, J. Keller, J. French *et al.*, 2001-09-30 *A Review of Human*  
20 *Performance Models for the Prediction of Human Error*. National Aeronautics and Space  
21 Administration, System-Wide Accident Prevention Program, Ames Research Center,  
22 Moffett Field, CA,  
23 <http://citeseerx.ist.psu.edu/viewdoc/download?doi=10.1.1.468.6969&rep=rep1&type=pdf>  
24 .
- 25 NASA, M. Stamatelatos and H. Dezfuli, 2011 *Probabilistic Risk Assessment Procedures Guide*  
26 *for NASA Managers and Practitioners (2nd Edition)*, NASA Headquarters, Washington,  
27 DC.
- 28 NCI-NHGRI Working Group on Replication in Association Studies, S. J. Chanock, T. Manolio,  
29 M. Boehnke, E. Boerwinkle *et al.*, 2007 Replicating genotype-phenotype associations.  
30 *Nature* 447: 655-660.
- 31 Ng, A., B. Bursteinas, Q. Gao, E. Mollison and M. Zvelebil, 2006 Resources for integrative  
32 systems biology: from data through databases to networks and dynamic system models.  
33 *Brief Bioinform* 7: 318-330.
- 34 NIH, 2015 National Institutes of Health Plan for Increasing Access to Scientific Publications and  
35 Digital Scientific Data from NIH Funded Scientific Research. 2015-02:  
36 <https://grants.nih.gov/grants/NIH-Public-Access-Plan.pdf>.
- 37 NIH, 2016 Strategies for NIH Data Management, Sharing, and Citation. Request for Information  
38 (RFI) Notice Number NOT-OD-17-015: [http://grants.nih.gov/grants/guide/notice-](http://grants.nih.gov/grants/guide/notice-files/NOT-OD-17-015.html)  
39 [files/NOT-OD-17-015.html](http://grants.nih.gov/grants/guide/notice-files/NOT-OD-17-015.html).
- 40 NIH, Blue Ribbon Panel, Tyler Jacks, E. Jaffee, D. Singer *et al.*, 2016 Cancer Moonshot Blue  
41 Ribbon Panel Report 2016-10-17, pp. [https://www.cancer.gov/research/key-](https://www.cancer.gov/research/key-initiatives/moonshot-cancer-initiative/blue-ribbon-panel/blue-ribbon-panel-report-2016.pdf)  
42 [initiations/moonshot-cancer-initiative/blue-ribbon-panel/blue-ribbon-panel-report-](https://www.cancer.gov/research/key-initiatives/moonshot-cancer-initiative/blue-ribbon-panel/blue-ribbon-panel-report-2016.pdf)  
43 [2016.pdf](https://www.cancer.gov/research/key-initiatives/moonshot-cancer-initiative/blue-ribbon-panel/blue-ribbon-panel-report-2016.pdf). National Institutes of Health,.
- 44 NIH, D. DeMets, L. Tabak, R. Altman, D. Botstein *et al.*, 2012 Data and Informatics Working  
45 Group Report to the Advisory Committee to the Director, pp., [http://acd.od.nih.gov/Data](http://acd.od.nih.gov/Data%20and%20Informatics%20Working%20Group%20Report.PDF)  
46 [and Informatics Working Group Report.PDF](http://acd.od.nih.gov/Data%20and%20Informatics%20Working%20Group%20Report.PDF).
- 47 Nordstokke, D. W., and B. D. Zumbo, 2007 A Cautionary Tale About Levene's Tests for Equal  
48 Variances. *Journal of Educational Research & Policy Studies* 7: 1-14.
- 49 Nuzzo, R., 2014 Scientific method: statistical errors. *Nature* 506: 150-152.
- 50 Oconnell, P., and M. Rosbash, 1984 Sequence, Structure, and Codon Preference of the  
51 *Drosophila* Ribosomal Protein-49 Gene. *Nucleic Acids Research* 12: 5495-5513.

- 1 Ogawa, Y., K. Arakawa, K. Kaizu, F. Miyoshi, Y. Nakayama *et al.*, 2008 Comparative study of  
2 circadian oscillatory network models of *Drosophila*. *Artificial life* 14: 29-48.
- 3 Oh, Y., S.-E. Yoon, Q. Zhang, H.-S. Chae, I. Daubnerová *et al.*, 2014 A homeostatic sleep-  
4 stabilizing pathway in *Drosophila* composed of the sex peptide receptor and its ligand,  
5 the myoinhibitory peptide., pp. e1001974 in *PLOS Biol.*
- 6 Okada, T., T. Sakai, T. Murata, K. Kako, K. Sakamoto *et al.*, 2001 Promoter analysis for daily  
7 expression of *Drosophila* timeless gene. *Biochemical and Biophysical Research*  
8 *Communications* 283: 577-582.
- 9 Oliver, D., and J. Phillips, 1970 Technical Note. *Drosophila Information Service*.
- 10 Onitilo, A. A., 2014 Is it time for the Cochrane Collaboration to reconsider its meta-analysis  
11 methodology? *Clin Med Res* 12: 2-3.
- 12 Opitz, J. M., 1983 Cotterman and combinatorial genetics. *Am J Med Genet* 16: 389-392.
- 13 Orchard, S., and H. Hermjakob, 2015 Shared resources, shared costs--leveraging biocuration  
14 resources. *Database (Oxford)* 2015.
- 15 Oreskes, N., K. Shraderfrechette and K. Belitz, 1994 Verification, Validation, and Confirmation  
16 of Numerical-Models in the Earth-Sciences. *Science* 263: 641-646.
- 17 Orpana, A. K., T. H. Ho and J. Stenman, 2012 Multiple Heat Pulses during PCR Extension  
18 Enabling Amplification of GC-Rich Sequences and Reducing Amplification Bias.  
19 *Analytical Chemistry* 84: 2081-2087.
- 20 Özkaya, Ö., and E. Rosato, 2012 The circadian clock of the fly: a neurogenetics journey through  
21 time., pp. 79-123 in *Adv Genet.*
- 22 Ozturk, N. N., C. P. C. Selby, Y. Y. Annayev, D. D. Zhong and A. A. Sancar, 2011 Reaction  
23 mechanism of *Drosophila* cryptochrome. *Proceedings of the National Academy of*  
24 *Sciences of the United States of America* 108: 516-521.
- 25 Packer, M., 2016 Data sharing: lessons from Copernicus and Kepler. *BMJ* 354: i4911.
- 26 Panko, R. R., 1998 Applying code inspection to spreadsheet testing. *Effective Utilization and*  
27 *Management of Emerging Information Technologies*: 358-362.
- 28 Panko, R. R., 2013 Users and Uses Research: Understanding "The Familiar Unknown". *Journal*  
29 *of Organizational and End User Computing* 25: Iv-Xi.
- 30 Panko, R. R., 2016 Human Error Website. Accessed 2016-10-31:  
31 <http://panko.shidler.hawaii.edu/HumanErr/Index.htm>
- 32 Panko, R. R., and S. Aurigemma, 2010 Revising the Panko-Halverson taxonomy of spreadsheet  
33 errors. *Decision Support Systems* 49: 235-244.
- 34 Parekh, P. K., A. R. Ozburn and C. A. McClung, 2015 Circadian clock genes: effects on  
35 dopamine, reward and addiction. *Alcohol* 49: 341-349.
- 36 Patel, V. R., K. Eckel-Mahan, P. Sassone-Corsi and P. Baldi, 2012 CircadiOmics: integrating  
37 circadian genomics, transcriptomics, proteomics and metabolomics. *Nature Methods* 9:  
38 772-773.
- 39 Patil, P., P. O. Bachant-Winner, B. Haibe-Kains and J. T. Leek, 2015 Test set bias affects  
40 reproducibility of gene signatures. *Bioinformatics* 31: 2318-2323.
- 41 Pegoraro, M., S. Noreen, S. Bhutani, A. Tsolou, R. Schmid *et al.*, 2014 Molecular evolution of a  
42 pervasive natural amino-acid substitution in *Drosophila* cryptochrome. *PLOS ONE* 9:  
43 e86483.
- 44 Pembroke, W. G., A. Babbs, K. E. Davies, C. P. Ponting and P. L. Oliver, 2015 Temporal  
45 transcriptomics suggest that twin-peaking genes reset the clock. *Elife* 4.
- 46 Peschel, N., 2008 New insights into circadian photoreception and the molecular regulation of  
47 the resetting of *Drosophila* circadian clock. 1-163.
- 48 Peschel, N., K. F. Chen, G. Szabo and R. Stanewsky, 2009 Light-dependent interactions  
49 between the *Drosophila* circadian clock factors cryptochrome, jetlag, and timeless. *Curr*  
50 *Biol* 19: 241-247.



- 1 Peschel, N., and C. Helfrich-Förster, 2011 Setting the clock – by nature: Circadian rhythm in the  
2 fruitfly *Drosophila melanogaster*. *Febs Letters* 585: 1435-1442.
- 3 Petri, B., and M. Stengl, 2001 Phase response curves of a molecular model oscillator:  
4 implications for mutual coupling of paired oscillators., pp. 125-141 in *J Biol Rhythms*.
- 5 Pierce, B. C., 2002 *Types and programming languages*. MIT Press, Cambridge, Mass.
- 6 Pierce, B. C., 2005 *Advanced topics in types and programming languages*. MIT Press,  
7 Cambridge, Mass.
- 8 Pittendrigh, C., and G. Victor, 1957 An Oscillator Model for Biological Clocks in *Rhythmic and*  
9 *Synthetic Processes in Growth*, edited by D. Rudnick. Princeton University Press,  
10 Princeton, NJ.
- 11 Pizarro, A., K. Hayer, N. F. Lahens and J. B. Hogenesch, 2013 CircaDB: a database of  
12 mammalian circadian gene expression profiles. *Nucleic Acids Res* 41: D1009-1013.
- 13 Plautz, J. D., M. Straume, R. Stanewsky, C. F. Jamison, C. Brandes *et al.*, 1997 Quantitative  
14 analysis of *Drosophila* period gene transcription in living animals. *Journal of biological*  
15 *rhythms* 12: 204-217.
- 16 Plowman, A. B., 2008 BIAZA statistics guidelines: toward a common application of statistical  
17 tests for zoo research. *Zoo Biol* 27: 226-233.
- 18 Pogue-Geile, K. L., J. Lyons-Weiler and D. C. Whitcomb, 2006 Molecular overlap of fly circadian  
19 rhythms and human pancreatic cancer. *Cancer Letters* 243: 55-57.
- 20 Poldrack, R. A., and J. B. Poline, 2015 The publication and reproducibility challenges of shared  
21 data. *Trends Cogn Sci* 19: 59-61.
- 22 Preussner, M., and F. Heyd, 2016 Post-transcriptional control of the mammalian circadian clock:  
23 implications for health and disease. *Pflugers Archiv-European Journal of Physiology*  
24 468: 983-991.
- 25 Price, J. L., J. Blau, A. Rothenfluh, M. Abodeely, B. Kloss *et al.*, 1998 double-time Is a Novel  
26 *Drosophila* Clock Gene that Regulates PERIOD Protein Accumulation. *Cell* 94: 83-95.
- 27 Purcell, O., B. Jain, J. R. Karr, M. W. Covert and T. K. Lu, 2013 Towards a whole-cell modeling  
28 approach for synthetic biology. *Chaos* 23: 025112.
- 29 Qiu, J., and P. E. Hardin, 1996 per mRNA cycling is locked to lights-off under photoperiodic  
30 conditions that support circadian feedback loop function., pp. 4182-4188 in *Mol Cell Biol*.
- 31 Qu, Y., and M. Boutjdir, 2007 RNase Protection Assay for Quantifying Gene Expression Levels  
32 in *Methods in Molecular Biology - Cardian Gene Expression: Methods and Protocols*,  
33 edited by J. Zhang and G. Rokosh. Humana Press Inc., Totowa, N.J.
- 34 Raymond, E. S., 2003 *The Art of Unix Programming*. Addison-Wesley (Pearson), Boston, MA,  
35 USA. <http://www.catb.org/~esr/writings/taoup/>.
- 36 Razali, N., J. Noble and S. Marshall, 2015-10-26 Operators and Precedence in Programming  
37 Languages. *PLATEAU'15*: 53-56 (<http://dx.doi.org/10.1145/2846680.2846690> ).
- 38 Read, K. B., J. R. Sheehan, M. F. Huerta, L. S. Knecht, J. G. Mork *et al.*, 2015 Sizing the  
39 Problem of Improving Discovery and Access to NIH-Funded Data: A Preliminary Study.  
40 *PLOS ONE* 10: e0132735.
- 41 Reason, J. T., 1990 *Human error*. Cambridge University Press, Cambridge England ; New York.
- 42 Reason, J. T., 2013 *A life in error : from little slips to big disasters*. Ashgate, Surrey, UK  
43 England.
- 44 Reason, J. T., 2015 *Organizational accidents revisited*. Ashgate, Burlington, VT.
- 45 Reason, J. T., and A. Hobbs, 2003 *Managing maintenance error : a practical guide*. Ashgate,  
46 Aldershot, Hampshire, England ; Burlington, VT, USA.
- 47 Reason, J. T., and K. Mycielska, 1982 *Absent-minded? : the psychology of mental lapses and*  
48 *everyday errors*. Prentice-Hall, Englewood Cliffs, N.J.
- 49 Refinetti, R., G. C. Lissen and F. Halberg, 2007 Procedures for numerical analysis of circadian  
50 rhythms. *Biol Rhythm Res* 38: 275-325.

- 1 Reiser, L., T. Z. Berardini, D. Li, R. Muller, E. M. Strait *et al.*, 2016 Sustainable funding for  
2 biocuration: The Arabidopsis Information Resource (TAIR) as a case study of a  
3 subscription-based funding model. Database (Oxford) 2016.
- 4 Richier, B., C. Michard-Vanhee, A. Lamouroux, C. Papin and F. Rouyer, 2008 The clockwork  
5 orange *Drosophila* protein functions as both an activator and a repressor of clock gene  
6 expression. J Biol Rhythms 23: 103-116.
- 7 Risau-Gusman, S., and P. M. Gleiser, 2012 Modelling the effect of phosphorylation on the  
8 circadian clock of *Drosophila*. Journal of theoretical biology 307: 53-61.
- 9 Risau-Gusman, S., and P. M. Gleiser, 2014 A Mathematical Model of Communication between  
10 Groups of Circadian Neurons in *Drosophila melanogaster*. Journal of biological rhythms  
11 29: 401-410.
- 12 Robert, C., and M. Watson, 2015 Errors in RNA-Seq quantification affect genes of relevance to  
13 human disease. Genome Biol 16: 177.
- 14 Robert, C. P., J. M. Cornuet, J. M. Marin and N. S. Pillai, 2011 Lack of confidence in  
15 approximate Bayesian computation model choice. Proc Natl Acad Sci U S A 108: 15112-  
16 15117.
- 17 Roberts, A., L. Schaeffer and L. Pachter, 2013 Updating RNA-Seq analyses after re-annotation.  
18 Bioinformatics 29: 1631-1637.
- 19 Robinson, S. W., P. Herzyk, J. A. Dow and D. P. Leader, 2013 FlyAtlas: database of gene  
20 expression in the tissues of *Drosophila melanogaster*. Nucleic Acids Res 41: D744-750.
- 21 Roden, D. M., 2011 Personalized medicine and the genotype-phenotype dilemma. J Interv Card  
22 Electrophysiol 31: 17-23.
- 23 Rodriguez, J., C.-H. A. Tang, Y. L. Khodor, S. Vodala, J. S. Menet *et al.*, 2013 Nascent-Seq  
24 analysis of *Drosophila* cycling gene expression. Proceedings of the National Academy of  
25 Sciences of the United States of America 110: E275-E284.
- 26 Rodriguez-Esteban, R., 2015 Biocuration with insufficient resources and fixed timelines.  
27 Database (Oxford) 2015.
- 28 Roenneberg, T., and M. Mrosovsky, 1998 Molecular circadian oscillators: An alternative  
29 hypothesis. Journal of Biological Rhythms 13: 167-179.
- 30 Rosato, E., A. A. Peixoto, A. Gallippi, C. P. Kyriacou and R. Costa, 1996 Mutational  
31 mechanisms, phylogeny, and evolution of a repetitive region within a clock gene of  
32 *Drosophila melanogaster*., pp. 392-408 in *J Mol Evol*.
- 33 Rosato, E., E. Tauber and C. P. Kyriacou, 2006 Molecular genetics of the fruit-fly circadian  
34 clock. European Journal of Human Genetics 14: 729-738.
- 35 Rothenfluh, A., M. W. Young and L. Saez, 2000a A TIMELESS-independent function for  
36 PERIOD proteins in the *Drosophila* clock. Neuron 26: 505-514.
- 37 Rothenfluh, A. A., M. M. Abodeely, J. L. J. Price and M. W. M. Young, 2000b Isolation and  
38 analysis of six timeless alleles that cause short- or long-period circadian rhythms in  
39 *Drosophila*. Genetics 156: 665-675.
- 40 Rouyer, F., M. Rachidi, C. Pikielny and M. Rosbash, 1997 A new gene encoding a putative  
41 transcription factor regulated by the *Drosophila* circadian clock., pp. 3944-3954 in *EMBO*  
42 *J*.
- 43 Rubinson, C., 2014 Ontological Considerations When Modeling Missing Data With Relational  
44 Databases. Social Science Computer Review 32: 769-780.
- 45 Rund, S. S., J. E. Gentile and G. E. Duffield, 2013 Extensive circadian and light regulation of the  
46 transcriptome in the malaria mosquito *Anopheles gambiae*. BMC Genomics 14: 218.
- 47 Rund, S. S., T. Y. Hou, S. M. Ward, F. H. Collins and G. E. Duffield, 2011 Genome-wide  
48 profiling of diel and circadian gene expression in the malaria vector *Anopheles gambiae*.  
49 Proc Natl Acad Sci U S A 108: E421-430.

- 1 Ruoff, P., M. K. Christensen and V. K. Sharma, 2005 PER/TIM-mediated amplification, gene  
2 dosage effects and temperature compensation in an interlocking-feedback loop model of  
3 the *Drosophila* circadian clock. *Journal of theoretical biology* 237: 41-57.
- 4 Ruoff, P., and L. Rensing, 1996 The temperature-compensated goodwin model simulates many  
5 circadian clock properties. *Journal of Theoretical Biology* 179: 275-285.
- 6 Ruoff, P., L. Rensing, R. Kommedal and S. Mohsenzadeh, 1997 Modeling temperature  
7 compensation in chemical and biological oscillators. *Chronobiology International* 14:  
8 499-510.
- 9 Ruoff, P., M. Vinsjevik, C. Monnerjahn and L. Rensing, 1999 The Goodwin Oscillator: On the  
10 Importance of Degradation Reactions in the Circadian Clock. *Journal of biological*  
11 *rhythms* 14: 469-479.
- 12 Rutila, J. E., V. Suri, M. Le, W. V. So, M. Rosbash *et al.*, 1998 CYCLE is a second bHLH-PAS  
13 clock protein essential for circadian rhythmicity and transcription of *Drosophila* period  
14 and timeless. *Cell* 93: 805-814.
- 15 Saez-Rodriguez, J., J. C. Costello, S. H. Friend, M. R. Kellen, L. Mangravite *et al.*, 2016  
16 Crowdsourcing biomedical research: leveraging communities as innovation engines.  
17 *Nature Reviews Genetics* 17: 470-486.
- 18 Salanti, G., and J. P. Ioannidis, 2009 Synthesis of observational studies should consider  
19 credibility ceilings. *J Clin Epidemiol* 62: 115-122.
- 20 Salavaty, A., 2015 Carcinogenic effects of circadian disruption: an epigenetic viewpoint.  
21 *Chinese Journal of Cancer* 34.
- 22 Salimi, N., and R. Vita, 2006 The biocurator: Connecting and enhancing scientific data. *PLOS*  
23 *Computational Biology* 2: 1190-1192.
- 24 Salsburg, D. S., 1985 The Religion of Statistics as Practiced in Medical Journals. *American*  
25 *Statistician* 39: 220-223.
- 26 Sambrook, J., E. Fritsch and T. Maniatis, 1989 *Molecular Cloning: A Laboratory Manual*. Cold  
27 Spring Harbor Laboratory Press, Cold Spring Harbor, New York.
- 28 Samuels, S., B. Balint, H. von der Leyen, P. Hupe, L. de Koning *et al.*, 2016 Precision medicine  
29 in cancer: challenges and recommendations from an EU-funded cervical cancer  
30 biobanking study. *Br J Cancer*.
- 31 Sandrelli, F., E. Tauber, M. Pegoraro, G. Mazzotta, P. Cisotto *et al.*, 2007 A molecular basis for  
32 natural selection at the timeless locus in *Drosophila melanogaster*. *Science* 316: 1898-  
33 1900.
- 34 Sanghvi, J. C., S. Regot, S. Carrasco, J. R. Karr, M. V. Gutschow *et al.*, 2013 Accelerated  
35 discovery via a whole-cell model. *Nat Methods* 10: 1192-1195.
- 36 Sathyanarayanan, S., X. Zheng, R. Xiao and A. Sehgal, 2004 Posttranslational regulation of  
37 *Drosophila* PERIOD protein by protein phosphatase 2A. *Cell* 116: 603-615.
- 38 Savalei, V., and E. Dunn, 2015 Is the call to abandon p-values the red herring of the replicability  
39 crisis? *Frontiers in Psychology* 6.
- 40 Sawyer, L. A., J. M. Hennessy, A. A. Peixoto, E. Rosato, H. PARKINSON *et al.*, 1997 Natural  
41 variation in a *Drosophila* clock gene and temperature compensation., pp. 2117-2120 in  
42 *Science*.
- 43 Scheper, T. O., D. Klinkenberg, C. Pennartz and J. van Pelt, 1999a A mathematical model for  
44 the intracellular circadian rhythm generator. *Journal of Neuroscience* 19: 40-47.
- 45 Scheper, T. O. T., D. D. Klinkenberg, J. J. van Pelt and C. C. Pennartz, 1999b A model of  
46 molecular circadian clocks: multiple mechanisms for phase shifting and a requirement  
47 for strong nonlinear interactions. *Journal of biological rhythms* 14: 213-220.
- 48 Schnoes, A. M., S. D. Brown, I. Dodevski and P. C. Babbitt, 2009 Annotation error in public  
49 databases: misannotation of molecular function in enzyme superfamilies. *PLOS Comput*  
50 *Biol* 5: e1000605.
- 51 Schutt, R., and C. O'Neil, 2013 *Doing data science*. O'Reilly Media, Beijing ; Sebastopol.

- 1 Schwartz, B., 2004 *The paradox of choice : why more is less*. Ecco, New York.
- 2 Scribner, E. Y., and H. M. Fathallah-Shaykh, 2011 Modeling of regulatory networks: theory and  
3 applications in the study of the *Drosophila* circadian clock. *Methods in enzymology* 487:  
4 39-71.
- 5 Sehgal, A., J. L. Price, B. Man and M. W. Young, 1994 Loss of Circadian Behavioral Rhythms  
6 and per RNA Oscillations in the *Drosophila* Mutant timeless. *Science, New Series* 263:  
7 1603-1606.
- 8 Sehgal, A., A. Rothenfluh-Hilfiker, M. Hunter-Ensor, Y. Chen, M. P. Myers *et al.*, 1995 Rhythmic  
9 expression of timeless: a basis for promoting circadian cycles in period gene  
10 autoregulation., pp. 808-810 in *Science*.
- 11 Sephton, S., and D. Spiegel, 2003 Circadian disruption in cancer: a neuroendocrine-immune  
12 pathway from stress to disease? *Brain Behavior and Immunity* 17: 321-328.
- 13 SEQC/MAQC-III Consortium, 2014 A comprehensive assessment of RNA-seq accuracy,  
14 reproducibility and information content by the Sequencing Quality Control Consortium.  
15 *Nat Biotechnol* 32: 903-914.
- 16 Shabalina, S. A., L. Y. Yampolsky and A. S. Kondrashov, 1997 Rapid decline of fitness in  
17 panmictic populations of *Drosophila melanogaster* maintained under relaxed natural  
18 selection. *Proceedings Of the National Academy Of Sciences Of the United States Of*  
19 *America* 94: 13034-13039.
- 20 Shafer, O. T., M. Rosbash and J. W. Truman, 2002 Sequential nuclear accumulation of the  
21 clock proteins period and timeless in the pacemaker neurons of *Drosophila*  
22 *melanogaster*. *Journal of Neuroscience* 22: 5946-5954.
- 23 Sharkey, F. H., I. M. Banat and R. Marchant, 2004 Detection and quantification of gene  
24 expression in environmental bacteriology. *Applied and Environmental Microbiology* 70:  
25 3795-3806.
- 26 Sharma, A., S. Tiwari and M. Singaravel, 2016 Circadian rhythm disruption: health  
27 consequences. *Biological Rhythm Research* 47: 191-213.
- 28 Sharma, V. K., 2003 Adaptive significance of circadian clocks. *Chronobiology International* 20:  
29 901-919.
- 30 Sharpe, D., 2013 Why the Resistance to Statistical Innovations? Bridging the Communication  
31 Gap. *Psychological Methods* 18: 572-582.
- 32 Shenk, D., 1997 *Data smog : surviving the information glut*. Harper Edge, San Francisco, Calif.
- 33 Shi, L. M., L. H. Reid, W. D. Jones, R. Shippy, J. A. Warrington *et al.*, 2006 The MicroArray  
34 Quality Control (MAQC) project shows inter- and intraplatform reproducibility of gene  
35 expression measurements. *Nature Biotechnology* 24: 1151-1161.
- 36 Shi, M., Z. Yue, A. Kuryatov, J. M. Lindstrom, A. Sehgal *et al.*, 2014 Identification of Redeye, a  
37 new sleep-regulating protein whose expression is modulated by sleep amount. *eLife* 3:  
38 e01473.
- 39 Sidote, D., J. Majercak, V. Parikh and I. Edery, 1998 Differential effects of light and heat on the  
40 *Drosophila* circadian clock proteins PER and TIM. *Molecular and Cellular Biology* 18:  
41 2004-2013.
- 42 Simoni, A., W. Wolfgang, M. P. Topping, R. G. Kavlie, R. Stanewsky *et al.*, 2014 A  
43 mechanosensory pathway to the *Drosophila* circadian clock., pp. 525-528 in *Science*.
- 44 Singhal, A., R. Leaman, N. Catlett, T. Lemberger, J. McEntyre *et al.*, 2016 Pressing needs of  
45 biomedical text mining in biocuration and beyond: opportunities and challenges.  
46 *Database (Oxford)* 2016.
- 47 Smith, N. J. J., 2008 *Vagueness and Degrees of Truth*. Oxford University Press, Oxford, Great  
48 Britain.
- 49 Smolen, P., 2002 A detailed predictive model of the mammalian circadian clock.

- 1 Smolen, P., D. Baxter and J. Byrne, 2002 A Reduced Model Clarifies the Role of Feedback  
2 Loops and Time Delays in the *Drosophila* Circadian Oscillator. *Biophysical Journal* 83:  
3 2349-2359.
- 4 Smolen, P., D. A. Baxter and J. H. Byrne, 2000a Mathematical modeling of gene networks.  
5 *Neuron* 26: 567-580.
- 6 Smolen, P., D. A. Baxter and J. H. Byrne, 2000b Modeling transcriptional control in gene  
7 networks - Methods, recent results, and future directions. *Bulletin of Mathematical*  
8 *Biology* 62: 247-292.
- 9 Smolen, P., D. A. Baxter and J. H. Byrne, 2001 Modeling circadian oscillations with interlocking  
10 positive and negative feedback loops. *Journal of Neuroscience* 21: 6644-6656.
- 11 Smolen, P., P. E. Hardin, B. S. Lo, D. A. Baxter and J. H. Byrne, 2004 Simulation of *Drosophila*  
12 circadian oscillations, mutations, and light responses by a model with VRI, PDP-1, and  
13 CLK. *Biophysical Journal* 86: 2786-2802.
- 14 So, W. V., and M. Rosbash, 1997 Post-transcriptional regulation contributes to *Drosophila* clock  
15 gene mRNA cycling. *EMBO Journal* 16: 7146-7155.
- 16 Sonawani, A., P. Nilawe, R. S. Barai and S. Idicula-Thomas, 2010 ClotBase: a knowledgebase  
17 on proteins involved in blood coagulation. *Blood* 116: 855-856.
- 18 Soranno, P. A., E. G. Bissell, K. S. Cheruvilil, S. T. Christel, S. M. Collins *et al.*, 2015 Building a  
19 multi-scaled geospatial temporal ecology database from disparate data sources:  
20 fostering open science and data reuse. *Gigascience* 4: 28.
- 21 Soubeyrand, S., F. Carpentier, F. Guiton and E. K. Klein, 2013 Approximate Bayesian  
22 computation with functional statistics. *Statistical Applications in Genetics and Molecular*  
23 *Biology* 12.
- 24 St Pierre, S., and P. McQuilton, 2009 Inside FlyBase: biocuration as a career. *Fly (Austin)* 3:  
25 112-114.
- 26 Stainforth, D. A., T. Aina, C. Christensen, M. Collins, N. Faull *et al.*, 2005 Uncertainty in  
27 predictions of the climate response to rising levels of greenhouse gases. *Nature* 433:  
28 403-406.
- 29 Stajich, J. E., D. Block, K. Boulez, S. E. Brenner, S. A. Chervitz *et al.*, 2002 The Bioperl toolkit:  
30 Perl modules for the life sciences. *Genome Res* 12: 1611-1618.
- 31 Stanewsky, R., 2003 Genetic analysis of the circadian system in *Drosophila melanogaster* and  
32 mammals. *Journal of neurobiology* 54: 111-147.
- 33 Stanewsky, R., M. Kaneko, P. Emery, B. Beretta, K. Wager-Smith *et al.*, 1998 The cryb mutation  
34 identifies cryptochrome as a circadian photoreceptor in *Drosophila*., pp. 681-692 in *Cell*.
- 35 Stanewsky, R., K. S. Lynch, C. Brandes and J. C. Hall, 2002 Mapping of elements involved in  
36 regulating normal temporal period and timeless RNA expression patterns in *Drosophila*  
37 *melanogaster*., pp. 293-306 in *J Biol Rhythms*.
- 38 Stanewsky, R. R., C. F. C. Jamison, J. D. J. Plautz, S. A. S. Kay and J. C. J. Hall, 1997 Multiple  
39 circadian-regulated elements contribute to cycling period gene expression in *Drosophila*.  
40 *EMBO Journal* 16: 5006-5018.
- 41 Stanton-Geddes, J., C. G. de Freitas and C. D. Dambros, 2014 In defense of P values:  
42 comment on the statistical methods actually used by ecologists. *Ecology* 95: 637-642.
- 43 Sterne, J., 2003 Commentary: Null points - has interpretation of significance tests improved?  
44 *International Journal of Epidemiology* 32: 693-694.
- 45 Stodden, V., 2015 Reproducing Statistical Results. *Annu. Rev. Stat. Appl.* 2: 1-19.
- 46 Stodden, V., F. Leisch and R. D. Peng (Editors), 2014 *Implementing Reproducible Research*.  
47 CRC Press, Boca Raton, FL.
- 48 Stodden, V., M. McNutt, D. H. Bailey, E. Deelman, Y. Gil *et al.*, 2016 Enhancing reproducibility  
49 for computational methods. *Science* 354: 1240-1241.
- 50 Stoleru, D. D., Y. Y. Peng, J. J. Agosto and M. M. Rosbash, 2004 Coupled oscillators control  
51 morning and evening locomotor behaviour of *Drosophila*. *Nature* 431: 862-868.

- 1 Streit, S., C. W. Michalski, M. Erkan, J. Kleeff and H. Friess, 2009 Northern blot analysis for  
2 detection and quantification of RNA in pancreatic cancer cells and tissues. *Nat Protoc* 4:  
3 37-43.
- 4 Stumpf, M. P., 2014 Approximate Bayesian inference for complex ecosystems. *F1000Prime*  
5 Rep 6: 60.
- 6 Subramanian, P., V. Prasanna, J. J. Jayapalan, P. S. Abdul Rahman and O. H. Hashim, 2014  
7 Role of *Bacopa monnieri* in the temporal regulation of oxidative stress in clock mutant  
8 (*cryb*) of *Drosophila melanogaster*., pp. 37-44 in *J Insect Physiol*.
- 9 Sullivan, D. E., J. L. Gabbard, Jr., M. Shukla and B. Sobral, 2010 Data integration for dynamic  
10 and sustainable systems biology resources: challenges and lessons learned. *Chem*  
11 *Biodivers* 7: 1124-1141.
- 12 Sun, Y. Q., J. Y. Li, J. X. Liu, B. Y. Sun and C. Chow, 2014 An improvement of symbolic  
13 aggregate approximation distance measure for time series. *Neurocomputing* 138: 189-  
14 198.
- 15 Sunnaker, M., A. G. Busetto, E. Numminen, J. Corander, M. Foll *et al.*, 2013 Approximate  
16 Bayesian Computation. *PLOS Computational Biology* 9.
- 17 Supp, S. R., D. N. Koons and S. K. M. Ernest, 2015a Using life history trade-offs to understand  
18 core-transient structuring of a small mammal community. *Ecosphere* 6.
- 19 Supp, S. R., F. A. La Sorte, T. A. Cormier, M. C. W. Lim, D. R. Powers *et al.*, 2015b Citizen-  
20 science data provides new insight into annual and seasonal variation in migration  
21 patterns. *Ecosphere* 6.
- 22 Taniguchi, M., K. Miura, H. Iwao and S. Yamanaka, 2001 Quantitative assessment of DNA  
23 microarrays - Comparison with Northern blot analyses. *Genomics* 71: 34-39.
- 24 Tarantola, A., 2005 *Inverse problem theory and methods for model parameter estimation*.  
25 Society for Industrial and Applied Mathematics, Philadelphia, PA.
- 26 Tarantola, A., 2006 Popper, Bayes and the inverse problem. *Nature Physics* 2: 492-494.
- 27 Tarantola, A., and B. Valette, 1982 Inverse Problems = Quest for Information. *Journal of*  
28 *Geophysics-Zeitschrift Fur Geophysik* 50: 159-170.
- 29 Taroni, F., A. Biedermann and S. Bozza, 2016 Statistical hypothesis testing and common  
30 misinterpretations: Should we abandon p-value in forensic science applications?  
31 *Forensic Science International* 259.
- 32 Temme, C., L. B. Zhang, E. Kremmer, C. Ihling, A. Chartier *et al.*, 2010 Subunits of the  
33 *Drosophila* CCR4-NOT complex and their roles in mRNA deadenylation. *Rna-a*  
34 *Publication of the Rna Society* 16: 1356-1370.
- 35 Thalheim, B., and K. D. Schewe, 2011 NULL 'Value' Algebras and Logics. *Information Modelling*  
36 *and Knowledge Bases Xxii* 225: 354-367.
- 37 Tharyan, P., 1998 The relevance to meta-analysis, systematic reviews and the cochrane  
38 collaboration to clinical psychiatry. *Indian J Psychiatry* 40: 135-148.
- 39 The UniProt Consortium, 2017 UniProt: the universal protein knowledgebase. *Nucleic Acids Res*  
40 45: D158-D169.
- 41 Theurkauf, W. E., H. Baum, J. Y. Bo and P. C. Wensink, 1986 Tissue-Specific and Constitutive  
42 Alpha-Tubulin Genes of *Drosophila-Melanogaster* Code for Structurally Distinct Proteins.  
43 *Proceedings of the National Academy of Sciences of the United States of America* 83:  
44 8477-8481.
- 45 Toni, T., D. Welch, N. Strelkowa, A. Ipsen and M. P. Stumpf, 2009a Approximate Bayesian  
46 computation scheme for parameter inference and model selection in dynamical systems.  
47 *J R Soc Interface* 6: 187-202.
- 48 Toni, T., D. Welch, N. Strelkowa, A. Ipsen and M. P. H. Stumpf, 2009b Approximate Bayesian  
49 computation scheme for parameter inference and model selection in dynamical systems.  
50 *Journal of the Royal Society Interface* 6: 187-202.

- 1 Trafimow, D., and M. Marks, 2015 Editorial: banning null hypothesis significance testing  
2 procedures. *Basic and Applied Social Psychology* 37: 1-2.
- 3 Tressoldi, P. E., D. Giofre, F. Sella and G. Cumming, 2013 High Impact = High Statistical  
4 Standards? Not Necessarily So. *PLOS ONE* 8.
- 5 Turing, A. M., 1936 On computable numbers, with an application to the Entscheidungsproblem.  
6 *Proc. Lond. Math. Soc.* 42: 230-265.
- 7 Tyson, J. J., C. I. Hong, C. D. Thron and B. Novak, 1999 A simple model of circadian rhythms  
8 based on dimerization and proteolysis of PER and TIM., pp. 2411-2417 in *Biophys J.*
- 9 Ueda, H. R., M. Hagiwara and H. Kitano, 2001 Robust oscillations within the interlocked  
10 feedback model of *Drosophila* circadian rhythm. *Journal of theoretical biology* 210: 401-  
11 406.
- 12 Ueda, H. R., A. Matsumoto, M. Kawamura, M. Iino, T. Tanimura *et al.*, 2002 Genome-wide  
13 transcriptional orchestration of circadian rhythms in *Drosophila*. *Journal of biological*  
14 *chemistry* 277: 14048-14052.
- 15 Umezaki, Y., T. Yoshii, T. Kawaguchi, C. Helfrich-Förster and K. Tomioka, 2012 Pigment-  
16 dispersing factor is involved in age-dependent rhythm changes in *Drosophila*  
17 *melanogaster.*, pp. 423-432 in *J Biol Rhythms*.
- 18 Vaidya, A. T., D. Top, C. C. Manahan, J. M. Tokuda, S. Zhang *et al.*, 2013 Flavin reduction  
19 activates *Drosophila* cryptochrome. *Proceedings of the National Academy of Sciences of*  
20 *the United States of America* 110: 20455-20460.
- 21 Van Gelder, R. N., H. Bae, M. J. Palazzolo and M. A. Krasnow, 1995 Extent and character of  
22 circadian gene expression in *Drosophila melanogaster*: identification of twenty oscillating  
23 mRNAs in the fly head., pp. 1424-1436 in *Curr Biol*.
- 24 Van Gelder, R. N., and M. A. Krasnow, 1996 A novel circadianly expressed *Drosophila*  
25 *melanogaster* gene dependent on the period gene for its rhythmic expression., pp. 1625-  
26 1631 in *EMBO J*.
- 27 van Gend, C., and J. L. Snoep, 2008 Systems biology model databases and resources. *Essays*  
28 *Biochem* 45: 223-236.
- 29 van Renssen, A. S. H. P., 2005 *Gellish: A Generic Extensible Ontological Language - Design*  
30 *and Application of a Universal Data Structure*. Delft University Press, Delft, Netherlands.
- 31 Vandenbroucke, I. I., J. Vandesompele, A. De Paepa and L. Messiaen, 2001 Quantification of  
32 splice variants using real-time PCR. *Nucleic Acids Res* 29.
- 33 VanGuilder, H. D., K. E. Vrana and W. M. Freeman, 2008 Twenty-five years of quantitative PCR  
34 for gene expression analysis. *Biotechniques* 44: 619-626.
- 35 Vaux, D. L., 2012 Know when your numbers are significant. *Nature* 492: 180-181.
- 36 Venter, J. C., M. D. Adams, E. W. Myers, P. W. Li, R. J. Mural *et al.*, 2001 The sequence of the  
37 human genome. *Science* 291: 1304-1351.
- 38 Vilar, J. M. G., H. Y. Kueh, N. Barkai and S. Leibler, 2002 Mechanisms of noise-resistance in  
39 genetic oscillators. *Proceedings of the National Academy of Sciences of the United*  
40 *States of America* 99: 5988-5992.
- 41 Wager-Smith, K., and S. A. Kay, 2000 Circadian rhythm genetics: from flies to mice to humans.  
42 *Nature Genetics* 26: 23-27.
- 43 Wang, J., and T. Zhou, 2010 A computational model clarifies the roles of positive and negative  
44 feedback loops in the *Drosophila* circadian clock. *Physics Letters A* 374: 2743-2749.
- 45 Wang, T., and M. J. Brown, 1999 mRNA quantification by real time TaqMan polymerase chain  
46 reaction: Validation and comparison with RNase protection. *Analytical Biochemistry* 269:  
47 198-201.
- 48 Waraporn, N., and K. Porkaew, 2008 Semantics of null values in subqueries. *Imecs 2008:*  
49 *International Multiconference of Engineers and Computer Scientists, Vols I and II:* 400-  
50 405.

- 1 Wasserstein, R. L., and N. A. Lazar, 2016 The ASA's Statement on p-Values: Context, Process,  
2 and Purpose. *American Statistician* 70: 129-131.
- 3 Weber, F. F., D. D. Zorn, C. C. Rademacher and H.-C. H. Hung, 2011 Post-translational timing  
4 mechanisms of the *Drosophila* circadian clock. *Audio, Transactions of the IRE*  
5 *Professional Group on* 585: 1443-1449.
- 6 Weeks, A. R., S. W. McKechnie and A. A. Hoffmann, 2007 Robust clines and robust sampling: a  
7 reply to Kyriacou et al., pp. 1652-1654 in *J Evol Biol*.
- 8 Weiss, R., O. Bartok, S. Mezan, Y. Malka and S. Kadener, 2014 Synergistic interactions  
9 between the molecular and neuronal circadian networks drive robust behavioral  
10 circadian rhythms in *Drosophila melanogaster*. *PLOS Genet* 10: e1004252.
- 11 White, E. P., E. Baldrige, Z. T. Brym, K. J. Locey, D. J. McGlenn *et al.*, 2013 Nine simple ways  
12 to make it easier to (re)use your data. *Ideas in Ecology and Evolution* 6: 1–10.
- 13 Wierling, C., R. Herwig and H. Lehrach, 2007 Resources, standards and tools for systems  
14 biology. *Brief Funct Genomic Proteomic* 6: 240-251.
- 15 Wijnen, H., F. Naef, C. Boothroyd, A. Claridge-Chang and M. W. Young, 2006 Control of daily  
16 transcript oscillations in *Drosophila* by light and the circadian clock. *PLOS Genetics* 2:  
17 e39-e39.
- 18 Wilcox, R. R., 2002 Comparing the variances of two independent groups. *Br J Math Stat*  
19 *Psychol* 55: 169-175.
- 20 Wilcox, R. R., 2012 *Introduction to Robust Estimation & Hypothesis Testing 3rd Edition*.  
21 Academic Press (Elsevier), Amsterdam.
- 22 Wilkinson, D. J., 2012 *Stochastic modelling for systems biology*. CRC Press/Taylor & Francis,  
23 Boca Raton.
- 24 Wilkinson, M. D., M. Dumontier, I. J. Aalbersberg, G. Appleton, M. Axton *et al.*, 2016 The FAIR  
25 Guiding Principles for scientific data management and stewardship. *Sci Data* 3: 160018.
- 26 Wilkinson, R. D., 2013 Approximate Bayesian computation (ABC) gives exact results under the  
27 assumption of model error. *Stat Appl Genet Mol Biol* 12: 129-141.
- 28 Willenbrock, H., J. Salomon, R. Sokilde, K. B. Barken, T. N. Hansen *et al.*, 2009 Quantitative  
29 miRNA expression analysis: comparing microarrays with next-generation sequencing.  
30 *RNA* 15: 2028-2034.
- 31 Wolkenhauer, O., 2001 Systems biology: the reincarnation of systems theory applied in biology?  
32 *Brief Bioinform* 2: 258-270.
- 33 Woodger, J. H., A. Tarski and W. F. Floyd, 1937 *The axiomatic method in biology*. The  
34 University Press, Cambridge Eng.
- 35 Wooley, J. C., and H. S. Lin, 2005 Computational Modeling and Simulation as Enablers for  
36 Biological Discovery in *Catalyzing Inquiry at the Interface of Computing and Biology*,  
37 edited by J. C. Wooley and H. S. Lin, Washington (DC).
- 38 Woolston, C., 2015 Psychology journal bans P values. *Nature* 519: 9-9.
- 39 Wu, Q. Q., K. Smith-Miles and T. H. Tian, 2014 Approximate Bayesian computation schemes  
40 for parameter inference of discrete stochastic models using simulated likelihood density.  
41 *Bmc Bioinformatics* 15.
- 42 Wulbeck, C., E. Grieshaber and C. Helfrich-Forster, 2009 Blocking endocytosis in *Drosophila*'s  
43 circadian pacemaker neurons interferes with the endogenous clock in a PDF-dependent  
44 way. *Chronobiol Int* 26: 1307-1322.
- 45 Xie, Z., and D. Kulasiri, 2007 Modelling of circadian rhythms in *Drosophila* incorporating the  
46 interlocked PER/TIM and VRI/PDP1 feedback loops. *Journal of theoretical biology* 245:  
47 290-304.
- 48 Xie, Z., D. Kulasiri, S. Samarasinghe and J. Qian, 2010 An Unbiased Sensitivity Analysis  
49 Reveals Important Parameters Controlling Periodicity of Circadian Clock. *Biotechnology*  
50 *and Bioengineering* 105: 250-259.



- 1 Xu, K., X. Zheng and A. Sehgal, 2008 Regulation of feeding and metabolism by neuronal and  
2 peripheral clocks in *Drosophila*., pp. 289-300 in *Cell Metab.*
- 3 Yerushalmi, S., and R. M. Green, 2009 Evidence for the adaptive significance of circadian  
4 rhythms. *Ecology Letters* 12: 970-981.
- 5 Yi, M., Y. Jia, Q. Liu, J. Li and C. Zhu, 2006 Enhancement of internal-noise coherence  
6 resonance by modulation of external noise in a circadian oscillator. *Phys Rev E Stat*  
7 *Nonlin Soft Matter Phys* 73: 041923.
- 8 Yin, H. S., H. G. Qi, J. W. Xu, W. N. N. Hung and X. Y. Song, 2014 Generalized Framework for  
9 Similarity Measure of Time Series. *Mathematical Problems in Engineering.*
- 10 Yoshii, T., T. Todo, C. Wülbeck, R. Stanewsky and C. Helfrich-Förster, 2008 Cryptochrome is  
11 present in the compound eyes and a subset of *Drosophila*'s clock neurons. *The*  
12 *Journal of comparative neurology* 508: 952-966.
- 13 Yoshii, T., S. Vanin, R. Costa and C. Helfrich-Förster, 2009 Synergic entrainment of  
14 *Drosophila*'s circadian clock by light and temperature., pp. 452-464 in *J Biol*  
15 *Rhythms.*
- 16 Young, M. W., and S. A. Kay, 2001 Time zones: a comparative genetics of circadian clocks.  
17 *Nature reviews. Genetics* 2: 702-715.
- 18 Yu, W., H. Zheng, J. H. Houl, B. Dauwalder and P. E. Hardin, 2006 PER-dependent rhythms in  
19 CLK phosphorylation and E-box binding regulate circadian transcription. *Genes &*  
20 *development* 20: 723-733.
- 21 Yu, W. W., J. H. J. Houl and P. E. P. Hardin, 2011 NEMO Kinase Contributes to Core Period  
22 Determination by Slowing the Pace of the *Drosophila* Circadian Oscillator. *Current*  
23 *biology : CB* 21: 6-6.
- 24 Zak, D. E., F. J. Doyle, D. G. Vlachos and J. S. Schwaber, 2001 Stochastic kinetic analysis of  
25 transcriptional feedback models for circadian rhythms. *Proceedings of the 40th IEEE*  
26 *Conference on Decision and Control, Vols 1-5: 849-854.*
- 27 Zeeberg, B. R., J. Riss, D. W. Kane, K. J. Bussey, E. Uchio *et al.*, 2004 Mistaken identifiers:  
28 gene name errors can be introduced inadvertently when using Excel in bioinformatics.  
29 *BMC Bioinformatics* 5: 80.
- 30 Zeigler, B. P., 2012 *Guide to modeling and simulation of systems of systems.* Springer, New  
31 York.
- 32 Zeigler, B. P., and P. E. Hammonds, 2007 *Modeling & simulation-based data engineering :*  
33 *introducing pragmatics into ontologies for net-centric information exchange.* Academic,  
34 Burlington, MA.
- 35 Zeigler, B. P., H. Praehofer and T. G. Kim, 2000 *Theory of modeling and simulation : integrating*  
36 *discrete event and continuous complex dynamic systems.* Academic Press, San Diego.
- 37 Zeng, H., P. E. Hardin and M. Rosbash, 1994 Constitutive overexpression of the *Drosophila*  
38 period protein inhibits period mRNA cycling., pp. 3590-3598 in *EMBO J.*
- 39 Zerr, D. M., J. C. Hall, M. Rosbash and K. K. Siwicki, 1990 Circadian fluctuations of period  
40 protein immunoreactivity in the CNS and the visual system of *Drosophila*., pp. 2749-  
41 2762 in *J Neurosci.*
- 42 Zhang, R., N. F. Lahens, H. I. Ballance, M. E. Hughes and J. B. Hogenesch, 2014a A circadian  
43 gene expression atlas in mammals: implications for biology and medicine. *Proc Natl*  
44 *Acad Sci U S A* 111: 16219-16224.
- 45 Zhang, Z., W. Zhu and J. Luo, 2014b Bringing biocuration to China. *Genomics Proteomics*  
46 *Bioinformatics* 12: 153-155.
- 47 Zheng, X., K. Koh, M. Sowcik, C. J. Smith, D. Chen *et al.*, 2009 An isoform-specific mutant  
48 reveals a role of PDP1 epsilon in the circadian oscillator., pp. 10920-10927 in *J*  
49 *Neurosci.*
- 50 Zheng, X., M. Sowcik, D. Chen and A. Sehgal, 2014 Casein kinase 1 promotes synchrony of the  
51 circadian clock network., pp. 2682-2694 in *Mol Cell Biol.*

- 1 Zielinski, T., A. M. Moore, E. Troup, K. J. Halliday and A. J. Millar, 2014 Strengths and
- 2 Limitations of Period Estimation Methods for Circadian Data. PLOS ONE 9.
- 3 Ziemann, M., Y. Eren and A. El-Osta, 2016 Gene name errors are widespread in the scientific
- 4 literature. Genome Biol 17: 177.
- 5 Zinn, K., D. Dimaio and T. Maniatis, 1983 Identification of 2 Distinct Regulatory Regions
- 6 Adjacent to the Human Beta-Interferon Gene. Cell 34: 865-879.
- 7 Zordan, M. A., and F. Sandrelli, 2015 Circadian clock dysfunction and psychiatric disease: could
- 8 fruit flies have a say? Frontiers in Neurology 6.
- 9 Zweig, K. A., 2016 Section 11.8 Data responsibility and Data hygiene, pp. 350-361 in *Network*
- 10 *analysis literacy: a practical approach to the analysis of Networks*, edited by K. A. Zweig.
- 11 Springer Berlin Heidelberg, New York, NY.
- 12 Zwiebel, L. J., P. E. Hardin, J. C. Hall and M. Rosbash, 1991a Circadian oscillations in protein
- 13 and mRNA levels of the period gene of *Drosophila melanogaster*., pp. 533-537 in
- 14 *Biochem Soc Trans*.
- 15 Zwiebel, L. J., P. E. Hardin, X. Liu, J. C. Hall and M. Rosbash, 1991b A Posttranscriptional
- 16 Mechanism Contributes to Circadian Cycling of a Per-Beta-Galactosidase Fusion
- 17 Protein. Proceedings of the National Academy of Sciences of the United States of
- 18 America 88: 3882-3886.
- 19
- 20

## TABLES OVERVIEW – MAIN TEXT

- 1  
2  
3 TABLE 1. **Circadian clock components** referenced in this study as introduced by their  
4 Brief, Explicit, Summarizing and Technical Name equivalents defined by  
5 using the Evolvix BEST Names concept *page 188*  
6  
7 TABLE 2. **FlyClockbase and VBIR concepts and related keywords** as introduced by their Brief, Explicit,  
8 and Summarizing Name equivalents defined by using the Evolvix BEST Names concept **189**  
9  
10 TABLE 3. **Data in FlyClockbase** counting independently observed *D. melanogaster* time series  
11 summaries available for each clock component in the Summary Section of FlyClockbase **195**  
12  
13 TABLE 4. **Time series overview**: average (*Avg*), standard deviation (*SD*), and number of time series  
14 available (*n*) for peak and valley times of some mRNA and proteins in FlyClockbase **196**  
15  
16 TABLE 5. **Human error rates** for four *Mod5 PeakValleyTables* **197**  
17  
18 TABLE 6: **Timing distribution differences** tested between *per* and *tim* to compare averages and  
19 variances of peak and valley times for proteins and mRNAs after removing outliers **198**  
20  
21 TABLE 7: **Impact of outlier removal** approaches on differences  
22 in variance of protein peak times (PER – TIM) **199**  
23  
24 TABLE 8. **Standardization proxies**: overview of potential approximations for quantifying method detail  
25 standardization and method detail similarity for independent observations of *per* mRNA **200**  
26

## FIGURES OVERVIEW – MAIN TEXT

- 27  
28  
29 FIGURE 1. **Systems biology overview** of the circadian clock in *D. melanogaster* **201**  
30  
31 FIGURE 2. **Overview of FlyClockbase** organization and data model **202**  
32  
33 FIGURE 3. **Workflow for refining** the time series traits reported in peak-valley-tables **204**  
34  
35 FIGURE 4. **Where do models get their realism from?** Overview of data sources reported **206**  
36  
37 FIGURE 5. **Data accumulation over time**: overview of experimental studies available in FlyClockbase  
38 and their use for parameter estimation over time **207**  
39  
40 FIGURE 6. **Hypotheses on timing variances in PER and TIM** as tested by FlyClockbase data.  
41 FlyClockbase extends our understanding of circadian clocks in flies by enabling observations of  
42 significant differences in variance between peaks and valleys of different clock components **208**  
43  
44 FIGURE 7. **Histograms for *per* and *tim* mRNA and protein** time series traits like peaks and valleys as  
45 observed in independent experiments show how FlyClockbase helps compare variability **210**  
46  
47 FIGURE 8. **Comparisons of PCR vs non-PCR methods** for measuring amounts of *per* mRNA in time  
48 series as enabled by FlyClockbase **212**  
49  
50 FIGURE 9. **Referenced protocol use similarity matrix** for studies reporting *per* mRNA time series,  
51 grouping protocols by measurement approach **214**  
52  
53 FIGURE 10: **Logic of datasets in statistics**: example for an interaction of statistics and formal logic  
54 where the logic for selecting datasets unnecessarily reduced the power of a statistical test **216**  
55  
56 FIGURE 11: **Biological model curator and compiler architect collaboration model** for improving the  
57 integration of biological data into *VBIRs* while constructing the type system required by a  
58 *VBIR* compiler for handling the ubiquitous uncertainty of biological data more precisely **217**  
59

## RELATED ANALYSES

60  
61  
62 **Hypotheses comparing timing in PER and TIM**: data and analyses in Table 4, Table S1, and Table 6,  
63 Table 7, Figure 6, Figure 7, as well as parts of the Supplemental Statistical Analysis are related.  
64

65 **Comparing PCR vs non-PCR methods for measuring time series in *per* mRNA**: data and analyses in  
66 Table 8, Figure 8, Figure 9, Figure 10, and parts of the Supplemental Statistical Analysis are related.

1 **TABLE 1. Circadian clock components referenced in this study as introduced by their**  
 2 **Brief, Explicit, Summarizing and Technical Name equivalents defined by using**  
 3 **the Evolvix BEST Names concept.**

| <b>Brief Name</b> | <b>Explicit Name</b>      | <b>Summarizing Name (description)</b>                                                     | <b>Technical Name FlyBase ID</b> |
|-------------------|---------------------------|-------------------------------------------------------------------------------------------|----------------------------------|
| <i>clk</i>        | clock                     | Promotes transcription of <i>per</i> , <i>tim</i> , <i>pdp1</i> , <i>vri</i> , <i>cwo</i> | FBgn0023076                      |
| <i>per</i>        | period                    | Binds TIM, inhibits CLK action                                                            | FBgn0003068                      |
| <i>tim</i>        | timeless                  | Binds PER, inhibits CLK action, degraded in response to light                             | FBgn0014396                      |
| <i>cry</i>        | cryptochrome              | Activated by light, promotes TIM degradation                                              | FBgn0025680                      |
| <i>cwo</i>        | clockwork orange          | Stabilizes "jitters" (minor variations) in the clock                                      | FBgn0259938                      |
| <i>pdp1</i>       | PAR-domain protein 1      | Promotes transcription of <i>clk</i>                                                      | FBgn0016694                      |
| <i>vri</i>        | vriille                   | Inhibits action of PDP1                                                                   | FBgn0016076                      |
| <i>pdf</i>        | pigment-dispersing factor | Synchronizes different clock neurons                                                      | FBgn0023178                      |
| <i>sgg</i>        | shaggy                    | Phosphorylates TIM, promotes nuclear localization                                         | FBgn0003371                      |
| <i>jet</i>        | jetlag                    | F-box protein, contributes to TIM degradation                                             | FBgn0031652                      |
| <i>ck2a</i>       | casein kinase 2 alpha     | Phosphorylates PER, promotes nuclear localization                                         | FBgn0264492                      |
| <i>dbt</i>        | doubletime                | Phosphorylates PER, promotes degradation                                                  | FBgn0002413                      |
| <i>nmo</i>        | nemo                      | Phosphorylates PER, promotes further phosphorylation                                      | FBgn0011817                      |
| <i>slmb</i>       | slimb                     | F-box protein, contributes to PER degradation                                             | FBgn0283468                      |
| <i>cyc</i>        | cycle                     | Binds to CLK                                                                              | FBgn0023094                      |
| <i>cu, noc</i>    | curled, nocturnin         | Implicated in light response, metabolism, mRNA degradation                                | FBgn0261808                      |

4 Brief Names and Explicit Names represent abbreviations and full common names, respectively.  
 5 Summarizing Names provide a brief description, and Technical Names correspond to  
 6 hyperlinked FlyBase Identifiers. In the text, we follow the convention of denoting the proteins in  
 7 CAPITAL letters and mRNAs or genes in *italics* (hence the use of italics for the brief names  
 8 here). More about the way synonymous dialects (defined by the Evolvix BEST Names concept)  
 9 can help navigate biological naming complexity can be found elsewhere (LOEWE et al. (2014;  
 10 2016) and LOEWE et al. (2017) for a more in-depth discussion of naming).

**TABLE 2. FlyClockbase and VBIR concepts and related keywords as introduced by their Brief, Explicit, and Summarizing Name equivalents defined by using the Evolvix BEST Names concept.**

Overview of concepts by naming gives the *Brief* and *Explicit* Names used in the main text for important FlyClockbase data structures (always in *italics*, usually capitalizing the beginning of significant words). Their *Summarizing* Name gives a description that could be turned into a rather long very descriptive name. The nature of these names is defined by the Evolvix BEST Names concept, see <http://evolvix.org/naming> and LOEWE *et al.* (2017). Order of entries loosely follows conceptual relations. See main text for more details.

| Brief Name | Explicit Name                                    | Summarizing Name (description)                                                                                                                                                                                                                                                                                                                                                                                                                                                                                                             |
|------------|--------------------------------------------------|--------------------------------------------------------------------------------------------------------------------------------------------------------------------------------------------------------------------------------------------------------------------------------------------------------------------------------------------------------------------------------------------------------------------------------------------------------------------------------------------------------------------------------------------|
|            | <i>Italicized ProperNames</i>                    | <i>Brief</i> and <i>Explicit</i> names of FlyClockbase components are treated both as variables (hence <i>italicized</i> , indicating flexible content) and as proper nouns (hence Capitalized to contrast their special role with the generic role given by their name). In program code <i>ConcatenateAllWords</i> without spaces; our main text may add <i>SomeSpaces BackIn</i> for readability.                                                                                                                                       |
| VBIR       | <i>Versioned Biological Information Resource</i> | Systematic collection of biological information for a specific purpose, irrespective of technology used to implement it. Like FlyClockbase, <i>VBIRs</i> usually need to cope with much uncertainty, contradictions, gaps, and numerous exceptions in biological data. Their versioning indicates that they store biological information using controlled immutable increasing versioning numbers that label each publicly released <i>VBIR</i> variant and help ensure that previously released data remains accessible under that label. |
| POST       | <i>POSTsystem</i>                                | Project Organization Stabilizing Tool system is at the very foundations of organizing files in FlyClockbase, Evolvix, and TabFS and Evolvix. Stable online reference: <a href="http://evolvix.org/post">http://evolvix.org/post</a>                                                                                                                                                                                                                                                                                                        |
| StabZ      | <i>StablizingZone</i>                            | Backbone of a stabilizing versioning number system defined by the POST system of Evolvix; represented by the double capital letters ranging from <i>MM</i> to <i>TT</i> (from <i>MockupModel</i> to <i>TrustedTested</i> ). See Supplemental Material Table P1.                                                                                                                                                                                                                                                                            |
| TabFS      | <i>TabFS</i>                                     | Tab-delimited table text file system for organizing the basic file layout of FlyClockbase and Evolvix                                                                                                                                                                                                                                                                                                                                                                                                                                      |

|                          |                                       |                                                                                                                                                                                                                                                                                                                                                           |
|--------------------------|---------------------------------------|-----------------------------------------------------------------------------------------------------------------------------------------------------------------------------------------------------------------------------------------------------------------------------------------------------------------------------------------------------------|
| <i>Sec</i>               | <i>Section</i>                        | Topical area in a <i>VBIR</i> .                                                                                                                                                                                                                                                                                                                           |
| <i>SumS</i>              | <i>SummarySection</i>                 | Stores summarized statistics of published time series in FlyClockbase                                                                                                                                                                                                                                                                                     |
| <i>DetS</i>              | <i>DetailsSection</i>                 | Stores all details of non-summarized individual raw time series submissions in FlyClockbase to enable independent statistical analyses.                                                                                                                                                                                                                   |
| <i>H<sub>basic</sub></i> | <i>BasicNullHypothesis</i>            | See main text Results for a full definition.                                                                                                                                                                                                                                                                                                              |
| <i>Obs</i>               | <i>Observation</i>                    | <i>Obs</i> in FlyClockbase refers to biological observations that are closer to real-world biology than derived analyses (e.g. estimates, results). <i>Obs</i> stands in direct contrast to <i>Simulations</i> ( <i>Sim</i> , may try to mirror a given <i>Obs</i> ; see <a href="http://evolvix.org/post">http://evolvix.org/post</a> for more details). |
| <i>ObsRaw</i>            | <i>ObservationRaw</i>                 | <i>Obs</i> in the form of <i>Raw</i> data as received (use versioning to correct trivial errors if needed; no additional modifications allowed).                                                                                                                                                                                                          |
| <i>ObsMod</i>            | <i>ObservationModified</i>            | Any raw <i>Obs</i> modified before further processing, including the removal of obvious outliers (or any changes to input data that could be questioned). <i>ObsMods</i> start all with <i>ObsRaw</i> , and distinguish each modification by appropriate versioning, such as <i>ObsMod6</i> , originating from <i>ObsMod5</i> .                           |
| <i>ObsOdd</i>            | <i>ObservationOdd</i>                 | Any <i>Obs</i> classified as unusual, extreme or unexpected. Conceptual opposite of <i>ObsMaj</i> . Where possible store processing status as in <i>ObsRawOdd</i> , or <i>ObsMod1Odd</i> .                                                                                                                                                                |
| <i>ObsMaj</i>            | <i>ObservationMajority</i>            | Any <i>Obs</i> classified as usual, typical or expected. Conceptual opposite of <i>ObsMaj</i> . Where possible, store processing status as in <i>ObsMod6Maj</i> ( <i>Majority of Mod6 of Obs</i> ).                                                                                                                                                       |
| <i>Tbl</i>               | <i>Table</i>                          | A fundamental data structure in FlyClockbase; each <i>Tbl</i> is to be stored as a separate tab-delimited file that defines <i>Rows</i> and <i>Columns</i> and can be edited by spread-sheet software (see FlyClockbase for format details). <i>Tbls</i> for <i>Content</i> , <i>Attributes</i> , and <i>Traits</i> are very different.                   |
| <i>Col</i>               | <i>Column</i>                         | Minimal vertical selection of a <i>Table</i> , including each <i>Row</i> ; first <i>Row</i> is <i>ColumnHeader</i> .                                                                                                                                                                                                                                      |
| <i>Row</i>               | <i>Row</i>                            | Minimal horizontal selection of a <i>Table</i> , including each <i>Col</i> ; first <i>Col</i> may be <i>RowHeader</i> or <i>Time</i> , or an immutable <i>TableIndex</i> for unambiguously identifying each <i>Row</i> .                                                                                                                                  |
| <i>IDX</i>               | <i>IDIndex</i> ,<br><i>TableIndex</i> | Identifier index column in a table of TabFS or FlyClockbase, where the type of index is usually specified by a sequence of additional suffixes.                                                                                                                                                                                                           |

|               |                       |                                                                                                                                                                                                                                                                                                                    |
|---------------|-----------------------|--------------------------------------------------------------------------------------------------------------------------------------------------------------------------------------------------------------------------------------------------------------------------------------------------------------------|
| <i>ID</i>     | <i>Identifier</i>     | An unambiguous label (= name) that can be used in its context to refer to specific content it denotes.                                                                                                                                                                                                             |
| <i>IDL</i>    | <i>IDLocal</i>        | Atomic identifier, local and thereby relative to its local context, as defined elsewhere. This shortest of all IDs is given by a single positive integer.                                                                                                                                                          |
| <i>IDF</i>    | <i>IDFragment</i>     | An <i>ID</i> fragment requires context (for its first=top <i>IDL</i> ), but also specifies contexts for each <i>IDL</i> it contains in its path of local IDs (separated by “.”)                                                                                                                                    |
| <i>IDM</i>    | <i>IDMemory</i>       | Identifier guaranteed to refer to a unique item within a defined memory area, such as FlyClockbase. It can easily be made globally unique by prefixing it with the <i>IDG</i> of its memory area.                                                                                                                  |
| <i>IDG</i>    | <i>IDGlobal</i>       | Identifier as globally unique as possible; see figure 3 in Loewe <i>et al.</i> (2017).                                                                                                                                                                                                                             |
| 1             |                       |                                                                                                                                                                                                                                                                                                                    |
| <i>itm</i>    | <i>Item</i>           | Any entity that provides a <i>Context</i> for its <i>Content</i> , and that can itself be <i>Content</i> in some other <i>Context</i> . This makes <i>Items</i> nestable. <i>Items</i> can also have <i>Attributes</i> and <i>Traits</i> , which complement <i>Content</i> , albeit without being <i>Content</i> . |
| <i>Cxt</i>    | <i>Context</i>        | <i>Context</i> belongs to an <i>Item</i> and contains <i>Content</i> , <i>Attributes</i> , and <i>Traits</i> .                                                                                                                                                                                                     |
| <i>Cnt</i>    | <i>Content</i>        | Any container for directly storing ‘the data itself’, describing data item(s) of primary interest; contains neither <i>Attributes</i> nor <i>Traits</i> . <i>Content</i> is always stored in some <i>Context</i> .                                                                                                 |
| <i>Att</i>    | <i>Attribute</i>      | Any container for storing ‘data about data (meta-data)’, describing the non-computable type and value of a fragment of information inherent to the content of a given item; contains no <i>Traits</i> .                                                                                                            |
| <i>Tra</i>    | <i>Trait</i>          | Any container for storing ‘data derived from data’, describing a defined type and computable value that capture an emergent feature derived from <i>Content</i> and <i>Attributes</i> .                                                                                                                            |
| <i>Ref</i>    | <i>Reference</i>      | <i>Refs</i> in FlyClockbase, <i>TabFS</i> or <i>Evolvix</i> are always bibliographic references ready for citing in a paper.                                                                                                                                                                                       |
| <i>CntTbl</i> | <i>ContentTable</i>   | Frequently used <i>Type</i> of exclusively <i>Content</i> -storing <i>Table</i> (e.g. for <i>TimeSeries</i> ); there exists always a related <i>AttributeTable</i> for storing newly learned <i>Attributes</i> .                                                                                                   |
| <i>AttTbl</i> | <i>AttributeTable</i> | Set of <i>Attributes</i> for a given <i>ContentTable</i> . This <i>Type</i> of <i>Table</i> stores exclusively <i>Attributes</i> and always refers to a <i>ContentTable</i> .                                                                                                                                      |

|   |                                                                |                                                                                                |                                                                                                                                                                                                                                                                                                                                                                                                                                            |
|---|----------------------------------------------------------------|------------------------------------------------------------------------------------------------|--------------------------------------------------------------------------------------------------------------------------------------------------------------------------------------------------------------------------------------------------------------------------------------------------------------------------------------------------------------------------------------------------------------------------------------------|
|   | <i>TraTbl</i>                                                  | <i>TraitTable</i><br><br><i>SearchResult</i>                                                   | <i>Table</i> storing exclusively <i>Traits</i> . Always refers to a <i>ContentTable</i> (and its <i>Attributes</i> and code as source).<br>Set of <i>Tables</i> with <i>Content</i> and <i>Attributes</i> copied and <i>Traits</i> computed from FlyClockbase                                                                                                                                                                              |
| 1 | <i>BBin</i>                                                    | <i>BioBinary</i>                                                                               | A <i>BBin</i> stores 2 bits to distinguish 4 states enumerated by the <i>OKScale</i> ( <i>OK</i> , <i>OKO</i> , <i>KO</i> , <i>MIS</i> ), designed for statements in biology, where <i>FullyTrue</i> ( <i>OK</i> ) or <i>FullyFalse</i> ( <i>KO</i> ) are less appropriate than <i>Intermediate</i> ( <i>OKO</i> ), or assuming applicability is a <i>Mistake</i> ( <i>MIS</i> ).<br>see <i>BBin</i><br>see <i>BBin</i><br>see <i>BBin</i> |
|   | <i>OK</i> , <i>OKO</i><br><i>KO</i> , <i>MIS</i><br><i>OKS</i> | <i>FullyTrue</i> , <i>Intermediate</i><br><i>FullyFalse</i> , <i>Mistake</i><br><i>OKScale</i> |                                                                                                                                                                                                                                                                                                                                                                                                                                            |
|   | <i>TS</i>                                                      | <i>TimeSeries</i>                                                                              | <i>Content</i> data type central to FlyClockbase; stored in a <i>Table</i> with at least one <i>Column</i> for <i>Time</i> and one for an <i>Obs</i> of the amount of molecules specified in the <i>ColumnHeader</i>                                                                                                                                                                                                                       |
|   | <i>ZT</i>                                                      | <i>ZeitgeberTime</i>                                                                           | A time measure used in circadian clock research to denote the time that passed since the last dawn (i.e. Lights went “on”). Any event during the day is then measured in terms of decimalized hours after <i>ZT = 0h</i> .<br>Range: $0h < ZT \leq 24h$ .                                                                                                                                                                                  |
|   | <i>DZT</i>                                                     | <i>DailyZeitgeberTime</i>                                                                      | Identical to <i>ZT</i> . <i>DZT</i> replaces <i>ZT</i> in FlyClockbase and in this study. Its shows a decimalized <i>hour</i> of the day but hides its counter of days. <i>DZT</i> was defined to unmistakably refer to the circular nature of <i>hours / day</i> .<br>Range: $0h < DZT \leq 24h$ .                                                                                                                                        |
|   | <i>CZT</i>                                                     | <i>ContinuousZeitgeberTime</i>                                                                 | Almost identical to <i>DZT</i> , but not quite. Both appear the same for the first <i>24h</i> . They start diverging at the beginning of day 2 = end of day 1, when <i>DZT</i> time is “reset” to <i>0h</i> , while <i>CZT</i> progresses steadily: ..., <i>23h</i> , <i>24h</i> , <i>25h</i> , ... as measured in decimalized <i>hours</i> . Range: $0h < CZT < \text{unlimited } h$ .                                                    |
|   |                                                                | <i>Peak</i><br><i>Valley</i><br><i>PeakValleyTables</i>                                        | Daily time of highest amount of a component.<br>Daily time of lowest amount of a component.<br>The specific <i>SearchResultTable</i> compiled manually from FlyClockbase for testing hypotheses explored in this study.                                                                                                                                                                                                                    |
|   | <i>h</i>                                                       | <i>hours</i>                                                                                   | Default unit for measuring time in this study. Applies to <i>Peak</i> , <i>Valley</i> , <i>CZT</i> , <i>DZT</i> , and <i>ZT</i> . Here a day is defined by <i>24h</i> . Fractions of hours are decimal; FlyClockbase does not recognize minutes (e.g.: $0.9h = 54\text{min}$ ; $1.5h = 90\text{min}$ ; etc).                                                                                                                               |



|             |                         |                                                       |                                                                                                                                                                                                                                                                                                                                                                                                                                                                                                                                                                                                                                                                                                                                                                                      |
|-------------|-------------------------|-------------------------------------------------------|--------------------------------------------------------------------------------------------------------------------------------------------------------------------------------------------------------------------------------------------------------------------------------------------------------------------------------------------------------------------------------------------------------------------------------------------------------------------------------------------------------------------------------------------------------------------------------------------------------------------------------------------------------------------------------------------------------------------------------------------------------------------------------------|
| 1<br>2<br>3 | -                       | <i>comvar2</i>                                        | Robust statistical test for measuring the significance of differences in variance using bootstrap methods (albeit only for a <i>P</i> -value of 5%; see Statistical Methods for details).                                                                                                                                                                                                                                                                                                                                                                                                                                                                                                                                                                                            |
| 1<br>2<br>3 | <i>Avg</i><br><i>SD</i> | <i>Average</i><br><i>StandardDeviation, StDev</i>     | Averages default to the arithmetic mean<br>Typically shown in plots of this study: the standard deviation inferred from <i>n</i> data points which are assumed to follow a Normal distribution; $Var = SD^2$                                                                                                                                                                                                                                                                                                                                                                                                                                                                                                                                                                         |
| 1<br>2<br>3 | <i>Var</i>              | <i>Variance</i>                                       | Tested for significant differences by <i>comvar2</i> : the variance inferred using the same assumptions as for SD. $Var = SD^2$                                                                                                                                                                                                                                                                                                                                                                                                                                                                                                                                                                                                                                                      |
| 1<br>2<br>3 | <i>n</i><br><i>SEM</i>  | <i>NumberObserved</i><br><i>StandardError_of_Mean</i> | Number of observations in a given set.<br>Sometimes used in confusing ways to obscure variability. Ideally, all individual replicates are reported to enable reanalyzes; else quantiles or other summary statistics may aggregate values of the actual distribution of interest. SEM is not a measure of the data, but estimates errors of a summary statistic of the data; giving it a '3 <sup>rd</sup> hand quality'. Some authors further degrade meta-analysis power by confusing SD and SEM (SALSBURG 1985; VAUX 2012).                                                                                                                                                                                                                                                         |
| 1<br>2<br>3 | <i>CI</i>               | <i>ConfidenceInterval</i>                             | Denotes a credible range of values for a point estimate. A <i>CI</i> is defined by repeating a point estimate procedure (infinitely) many times and creating a histogram of the results. In that histogram, the range of values of the given point estimates that a given percentage of values is expected to take, is defined as a <i>CI</i> . A <i>CI</i> is defined incompletely without <ul style="list-style-type: none"> <li>- the percentage of all estimates it is to contain (e.g. 95% or 0.95 when rejecting 2.5% of correct values on both sides),</li> <li>- type information about the point estimate (e.g. <i>Avg</i>, or <i>Var</i>),</li> <li>- specifying what is being replicated while measuring the <i>CI</i> (experiments, bootstrap samples, etc.).</li> </ul> |
| 1<br>2<br>3 | <i>Mi</i>               | <i>ValueCredibleMiddle</i>                            | Denotes the most credible <i>Middle</i> point value. The type of this value defines how to compute credible values for <i>Lo</i> , <i>Mi</i> or <i>Hi</i> . Hence, this trio can generally be reused for quantifying distributions of any type, including those implicitly defined by the output of a computational procedure or human intuition.                                                                                                                                                                                                                                                                                                                                                                                                                                    |

|            |                            |                                                                                                                                                                                                                                                                                                                                                                                                                                                                                                                                                                                                                                                                                                                                                                                                                                                                                                                                                                                                 |
|------------|----------------------------|-------------------------------------------------------------------------------------------------------------------------------------------------------------------------------------------------------------------------------------------------------------------------------------------------------------------------------------------------------------------------------------------------------------------------------------------------------------------------------------------------------------------------------------------------------------------------------------------------------------------------------------------------------------------------------------------------------------------------------------------------------------------------------------------------------------------------------------------------------------------------------------------------------------------------------------------------------------------------------------------------|
| <i>Min</i> | <i>ValueMinimum</i>        | Guaranteed minimum of all values of a type.                                                                                                                                                                                                                                                                                                                                                                                                                                                                                                                                                                                                                                                                                                                                                                                                                                                                                                                                                     |
| <i>Lo</i>  | <i>ValueCredibleLow</i>    | Lower limit for a value that is still credible.                                                                                                                                                                                                                                                                                                                                                                                                                                                                                                                                                                                                                                                                                                                                                                                                                                                                                                                                                 |
| <i>Hi</i>  | <i>ValueCredibleHigh</i>   | Higher limit for a value that is still credible.                                                                                                                                                                                                                                                                                                                                                                                                                                                                                                                                                                                                                                                                                                                                                                                                                                                                                                                                                |
| <i>Max</i> | <i>ValueMaximum</i>        | Guaranteed maximum of all values of a type. The type defines whether observations or possibilities are to be considered.                                                                                                                                                                                                                                                                                                                                                                                                                                                                                                                                                                                                                                                                                                                                                                                                                                                                        |
| <i>EMU</i> | <i>ErrorMeasureUnknown</i> | An abstract error statement type for cases where nothing is known that could possibly limit potential errors. Used as default for unique <i>Obs</i> without error estimates. <i>EMU</i> is the equivalent to <i>Nothing</i> when it comes to making a statement about the <i>limits</i> of errors. <i>EMU</i> states that no information is available that might reduce the range of credible errors, not circumstantially, statistically, contextually, conceptually, numerically, or in any other way. <i>EMU</i> errors may be infinite (since unknown!), but they instantly collapse when estimating or observing actual errors in the real world. Under this logic, values with <i>no</i> attempt to quantify uncertainty are infinitely uncertain (not infinitely certain as often assumed). <i>EMUs</i> reward attempts to engage with uncertainty by estimating errors indirectly or by observing them directly when recording as many independent <i>Obs</i> replications as feasible. |
| -          | <i>Nothing</i>             | Abstract type that is foundational to all other types that indicate the absence of a particular thing, idea or activity.                                                                                                                                                                                                                                                                                                                                                                                                                                                                                                                                                                                                                                                                                                                                                                                                                                                                        |
| -          | <i>NotGiven</i>            | A special type of <i>Nothing</i> dedicated to representing that (i) a certain observation must have existed and (ii) could in principle have been recorded, but (iii) for whatever reason, the information was <i>NotGiven</i> . To reduce ambiguity in FlyClockbase, we redefined symbols that are commonly used in ambiguous ways to represent the resulting contradiction in type. Banning such errors simplifies recognizing such problems when importing data. For example, does 'NA' stand for 'NotAvailable' or 'NotApplicable'? Does '0' indicate absence or is it a measure of time using cyclical or linear numbers? What type is implied in 'NULL'?                                                                                                                                                                                                                                                                                                                                  |
| -          | <i>MethodRealm</i>         | Specifies in which of the broad biological realms of observation a given time series was measured ( <i>in vitro</i> , <i>in vivo</i> , <i>ex vivo</i> , <i>post mortem</i> )                                                                                                                                                                                                                                                                                                                                                                                                                                                                                                                                                                                                                                                                                                                                                                                                                    |

1  
2

TABLE 2 END

1 **TABLE 3. Data in FlyClockbase counting independently observed**  
2 ***D. melanogaster* time series summaries available for each clock**  
3 **component in the Summary Section of FlyClockbase.**  
4

| <b>Clock Component</b> | <b>Time Series [n]</b> | <b>Studies [n]</b> |
|------------------------|------------------------|--------------------|
| <i>per</i> mRNA        | 89                     | 42                 |
| PER protein            | 77                     | 26                 |
| <i>tim</i> mRNA        | 51                     | 27                 |
| TIM protein            | 42                     | 16                 |
| <i>clk</i> mRNA        | 33                     | 18                 |
| <i>vri</i> mRNA        | 31                     | 14                 |
| <i>cry</i> mRNA        | 18                     | 10                 |
| CRY protein            | 16                     | 6                  |
| <i>pdp1</i> mRNA       | 15                     | 10                 |
| CLK protein            | 10                     | 5                  |
| <i>cwo</i> mRNA        | 5                      | 3                  |
| PDF protein            | 4                      | 2                  |
| VRI protein            | 2                      | 2                  |
| <i>jet</i> mRNA        | 2                      | 1                  |
| <i>dbt</i> mRNA        | 2                      | 2                  |
| CYC protein            | 2                      | 1                  |
| <i>cyc</i> mRNA        | 1                      | 1                  |
| <i>sgg</i> mRNA        | 1                      | 1                  |
| <i>ck2</i> mRNA        | 1                      | 1                  |
| PDP1 protein           | 1                      | 1                  |
| <b>Total</b>           | <b>403</b>             | <b>86</b>          |

5  
6  
7  
8

TABLE 3 END

1  
2 **TABLE 4. Time series overview:**  
3 **average (Avg), standard deviation (SD), and number of time series available (n)**  
4 **for daily peak and valley times of some mRNA and proteins in FlyClockbase.**  
5

| Component<br>of the Clock | Peak             |    | Valley           |    |
|---------------------------|------------------|----|------------------|----|
|                           | Avg $\pm$ SD [h] | n  | Avg $\pm$ SD [h] | n  |
| <i>per</i> mRNA           | 14.64 $\pm$ 1.65 | 88 | 3.61 $\pm$ 2.60  | 24 |
| <i>tim</i> mRNA           | 14.54 $\pm$ 1.92 | 48 | 4.86 $\pm$ 1.52  | 21 |
| TIM protein               | 18.41 $\pm$ 2.54 | 37 | 6.33 $\pm$ 3.18  | 35 |
| PER protein               | 19.50 $\pm$ 3.40 | 33 | 9.27 $\pm$ 2.10  | 40 |
| <i>clk</i> mRNA           | 2.79 $\pm$ 3.16  | 12 | 14.33 $\pm$ 1.67 | 30 |
| CLK protein               | 11.57 $\pm$ 3.18 | 5  | 12.51 $\pm$ 4.30 | 9  |
| CRY protein               | 23.02 $\pm$ 1.59 | 15 | 9.96 $\pm$ 3.73  | 16 |
| <i>cry</i> mRNA           | 6.77 $\pm$ 2.96  | 11 | 16.23 $\pm$ 2.54 | 17 |
| <i>pdp1</i> mRNA          | 14.70 $\pm$ 1.81 | 15 | 4.68 $\pm$ 1.88  | 5  |

6  
7 A clock component is listed if at least four different time series values exist for both peak and  
8 valley. Statistics were computed for *Mod6* modified *PeakValleyTables* (see Figure 3) without  
9 removing outliers. All times in decimal fractions of hours have been linearized such that *CZT*  
10 (given) is effectively equivalent to a corresponding *DZT = ZT*. For related analyses see also  
11 Table S1, Table 6, Table 7, Figure 6, Figure 7, and parts of the Supplemental Statistical  
12 Analysis.  
13

14 TABLE 4 END  
15

**TABLE 5. Human error rates for four *Mod5 PeakValleyTables*.**

| <b>Clock Component</b><br>TimeSeries counted | <b>Errors</b><br>counted in<br>FlyClock-<br>base | <b><i>Peak TraitTable</i></b> |                          | <b><i>Valley TraitTable</i></b> |                          |
|----------------------------------------------|--------------------------------------------------|-------------------------------|--------------------------|---------------------------------|--------------------------|
|                                              |                                                  | <b>All Peaks</b><br>counted   | <b>Errors</b><br>counted | <b>All Valleys</b><br>counted   | <b>Errors</b><br>counted |
| <i>per</i> mRNA (88)                         | 2                                                | 87                            | 7                        | 24                              | 6                        |
| <i>tim</i> mRNA (49)                         | 1                                                | 48                            | 2                        | 20                              | 0                        |
| TIM protein (43)                             | 1                                                | 29                            | 4                        | 34                              | 6                        |
| PER protein (57)                             | 1                                                | 30                            | 12                       | 39                              | 8                        |

To approximate an error rate for *PeakValleyTables*, we chose the four *Mod5* tables of the most abundant clock components and re-examined the timing of each peak and valley in-depth. All errors were corrected in the *Mod6 PeakValleyTables*. Not all time series in FlyClockbase were long enough to include both a peak and a valley for day 1 (474 expected vs 311 observed peaks as shown in Figure 6). While the error rate for FlyClockbase is reasonably low for the columns tested (5 errors in at least about 5 effective columns in the big *TimeSeries AttributeTable* suggest an overall rate of at most about  $5 / (5 * (88+49+57+43)) = 0.42\%$  per cell; rule of thumb: ca 1% for trivial errors), manually exporting and computing *TraitTables* resulted in much higher error rates. Most of these are caused by the inconsistent manual application of technical procedures that had been agreed upon when analyzing the traits of highly heterogeneous time-series in their broader context (the 25 peak errors and the 20 valley errors resulted in about  $45 / 311 = 14\%$  errors; rule of thumb: > 10% for errors from forgetting one of a few rules). Ultimately, it is desirable to construct *PeakValleyTables* automatically via script. However, it is not clear whether this necessarily reduces the number of errors or the amount of time to achieve a given accuracy goal, unless data structures are rather uniform and/or the same errors reoccur often with only minor variations. A large number of procedural errors and their extreme heterogeneity can greatly complicate the (manual) implementation of code that needs to recognize each type of error in order to address it.

TABLE 5 END

1 **TABLE 6. Timing distribution differences tested between *per* and *tim***  
 2 **to compare averages and variances of peak and valley times**  
 3 **for proteins and mRNAs after removing outliers.**  
 4

|                       | Point distribution<br>CZT Observed [h] |             | Differences Distribution<br>of CZT point distributions [h] |                          |                          | Test                         |
|-----------------------|----------------------------------------|-------------|------------------------------------------------------------|--------------------------|--------------------------|------------------------------|
|                       | <i>per</i>                             | <i>tim</i>  | Lo 2.5%                                                    | Middle 50%               | Hi 97.5%                 | P-Value                      |
| <b>Protein peak</b>   |                                        |             |                                                            |                          |                          |                              |
| <i>Var</i>            | 4.1377                                 | 0.89211     | 0.97136                                                    | 3.2456                   | 5.6033                   | <b>* (P &lt; 5%)</b>         |
| <i>Avg</i>            | 18.644                                 | 18.915      | -0.99996                                                   | -1.2345x10 <sup>-5</sup> | 0.99994                  | 0.98753                      |
| <i>n</i>              | 91% =30/33                             | 78% =29/37  |                                                            |                          |                          |                              |
| <b>mRNA peak</b>      |                                        |             |                                                            |                          |                          |                              |
| <i>Var</i>            | 2.4877                                 | 4.4906      | -4.1225                                                    | -2.0029                  | -0.0035509               | <b>* (P &lt; 5%)</b>         |
| <i>Avg</i>            | 14.606                                 | 14.587      | -0.83733                                                   | 4.3138x10 <sup>-6</sup>  | 0.99996                  | 0.66505                      |
| <i>n</i>              | 99% =87/88                             | 100% =48/48 |                                                            |                          |                          |                              |
| <b>Protein valley</b> |                                        |             |                                                            |                          |                          |                              |
| <i>Var</i>            | 3.7568                                 | 6.3773      | -6.8437                                                    | -2.6205                  | 1.3534                   | (P > 5%)                     |
| <i>Avg</i>            | 9.4058                                 | 5.8421      | 3.00                                                       | 4.00                     | 5.00                     | <b>1.489x10<sup>-7</sup></b> |
| <i>n</i>              | 100% =39/39                            | 94% =34/36  |                                                            |                          |                          |                              |
| <b>mRNA valley</b>    |                                        |             |                                                            |                          |                          |                              |
| <i>Var</i>            | 5.3608                                 | 1.3215      | 0.17418                                                    | 4.0393                   | 8.3148                   | <b>* (P &lt; 5%)</b>         |
| <i>Avg</i>            | 3.606                                  | 5.0894      | -2.0611                                                    | -1.00                    | -1.8909x10 <sup>-5</sup> | <b>0.012835</b>              |
| <i>n</i>              | 100% =24/24                            | 100% =20/20 |                                                            |                          |                          |                              |

5  
 6 Removal procedures have been described elsewhere (CARLING 2000; WILCOX 2012), see our  
 7 approach (iii) in Statistical Methods, and *Mod6* in Figure 3 (this table and Figure 6 are based on  
 8 the same data). Abbreviations: *Var* = Variance calculated for data sampled from a given  
 9 distribution to quantify spread; *Avg* = Average = arithmetic mean calculated for a sample to  
 10 quantify the location of a distribution; *n* = numbers of observations without/with outliers; *P* =  
 11 probability of rejecting the null-hypothesis that the point distributions observed for *tim* and *per*  
 12 are drawn from the same underlying distribution according to an unpaired, two-sided Mann-  
 13 Whitney-U test for *Avg*, and the “*comvar2*” method with 10<sup>5</sup> bootstraps from Wilcox (2012) for  
 14 *Var*, as described in Materials and Methods (significant differences are highlighted in bold). The  
 15 additional digits in this table do not necessarily reflect accuracy. They were kept to simplify  
 16 searching for their context in the Supplemental Statistical Analysis (searches are fast, even  
 17 though not all mappings are unique; trailing zeroes were omitted by R and thus added back to  
 18 four of the numbers; some digits are greyed out to reduce visual clutter). See main text for  
 19 discussion and consequences of adding outliers back into this table. For related analyses see  
 20 also Table 7, Figure 6, Figure 7, Table 4, Table S1 and parts of the Supplemental Statistical  
 21 Analysis.

22 TABLE 6 END  
 23

1 **TABLE 7. Impact of outlier removal approaches on**  
 2 **differences in variance of protein peak times (PER – TIM).**  
 3

| <b>Outlier removal approach</b>       | <b>Outliers counted / All data</b> | <b>PER-TIM Variance Lo 2.5% CI</b> | <b>PER-TIM Variance Mi 50%</b> | <b>PER-TIM Variance Hi 97.5% CI</b> | <b>Significant at <math>P = 0.05</math></b> |
|---------------------------------------|------------------------------------|------------------------------------|--------------------------------|-------------------------------------|---------------------------------------------|
| No outliers removed                   | 0/33 (PER)<br>0/37 (TIM)           | <b>-8.308</b>                      | 4.7564                         | 15.755                              | <i>no</i>                                   |
| Removal type (ii):<br>Manual extremes | 3/30 (PER)<br>1/36 (TIM)           | <b>-1.7526</b>                     | 1.3432                         | 4.2201                              | <i>no</i>                                   |
| Removal type (iii):<br>Carling (2000) | 3/30 (PER)<br>8/29 (TIM)           | 0.97136                            | 3.2456                         | 5.6033                              | <i>yes</i>                                  |

4  
 5 Manual removal of four extremely different time series (row (ii)) substantially narrows the  
 6 distribution of differences in variance seen prior to removal. However, this does not yet achieve  
 7 the statistical significance seen when applying the Carling (2000) outlier removal approach (iii)  
 8 as used in Table 6. Each row reports one comparison that calculates  $Var(PER) - Var(TIM)$  using  
 9 “comvar2”,  $10^5$  bootstraps; see Statistical Methods Section. As seen in rows 1-2, if the *CI*  
 10 includes 0, the test indicates that the variances of both distributions are drawn from a common  
 11 distribution with a probability of 5% or more. For related analyses see also Table 6, Figure 6,  
 12 Figure 7, Table 4, Table S1 and parts of the Supplemental Statistical Analysis.

13  
 14 **TABLE 7 END**  
 15  
 16

**TABLE 8. Standardization proxies: overview of potential approximations for quantifying method detail standardization and method detail similarity for independent observations of *per* mRNA.**

| <b>Measurement method</b> | <b>Count of time series / studies</b> | <b>Any method refs <math>\geq 1</math> given for time series / given for studies</b> | <b>Shared method refs <math>\geq 1</math> given for time series / given for studies</b> |
|---------------------------|---------------------------------------|--------------------------------------------------------------------------------------|-----------------------------------------------------------------------------------------|
| <b>PCR</b>                | <b>25 / 13</b>                        | <b>72% (18 / 25) / 54% (7 / 13)</b>                                                  | <b>17% (3 / 18) / 29% (2 / 7)</b>                                                       |
| <b>RPA</b>                | <b>45 / 24</b>                        | <b>100% (45 / 45) / 100% (24 / 24)</b>                                               | <b>93% (42 / 45) / 88% (21 / 24)</b>                                                    |
| <b>Northern Blot</b>      | <b>9 / 5</b>                          | <b>56% (5 / 9) / 60% (3 / 5)</b>                                                     | <b>40% (2 / 5) / 67% (2 / 3)</b>                                                        |
| <b>Microarray</b>         | <b>4 / 3</b>                          | <b>0% (0 / 4) / 0% (0 / 3)</b>                                                       | <i>not applicable</i><br><i>not applicable</i>                                          |
| <b>RNA-Seq</b>            | <b>4 / 1</b>                          | <b>100% (4 / 4) / 100% (1 / 1)</b>                                                   | <i>not applicable</i><br><i>not applicable</i>                                          |

The count column specifies the number of time series or studies that used the general method type specified for the row. We approximated method standardization with a binary variable indicating whether or not any method references were cited in the paper. Here we assumed that papers who did not cite any method paper either adapted an existing method or did not closely follow a given set of instructions for other reasons (see text for implications). To approximate the similarity of methods that produced time series, we used another binary variable to indicate whether or not a given study shared at least one method reference with any of the other studies that cited at least one method reference. We assumed that shared references might indicate the use of more similar methods, which would result in more similar observations compared to ‘time series from papers that had only non-shared method references’ (but still required at least one method reference to be included). Note the subtle difference in logic when considering a comparison to ‘time series from papers that did not give shared method references’ (which includes those with no method references at all). See Figure 10 for a visualization of the corresponding sets and Figure 9 for the raw data on protocol use, which underpins this analysis.

TABLE 8 END



1  
2  
3

FIGURE 1

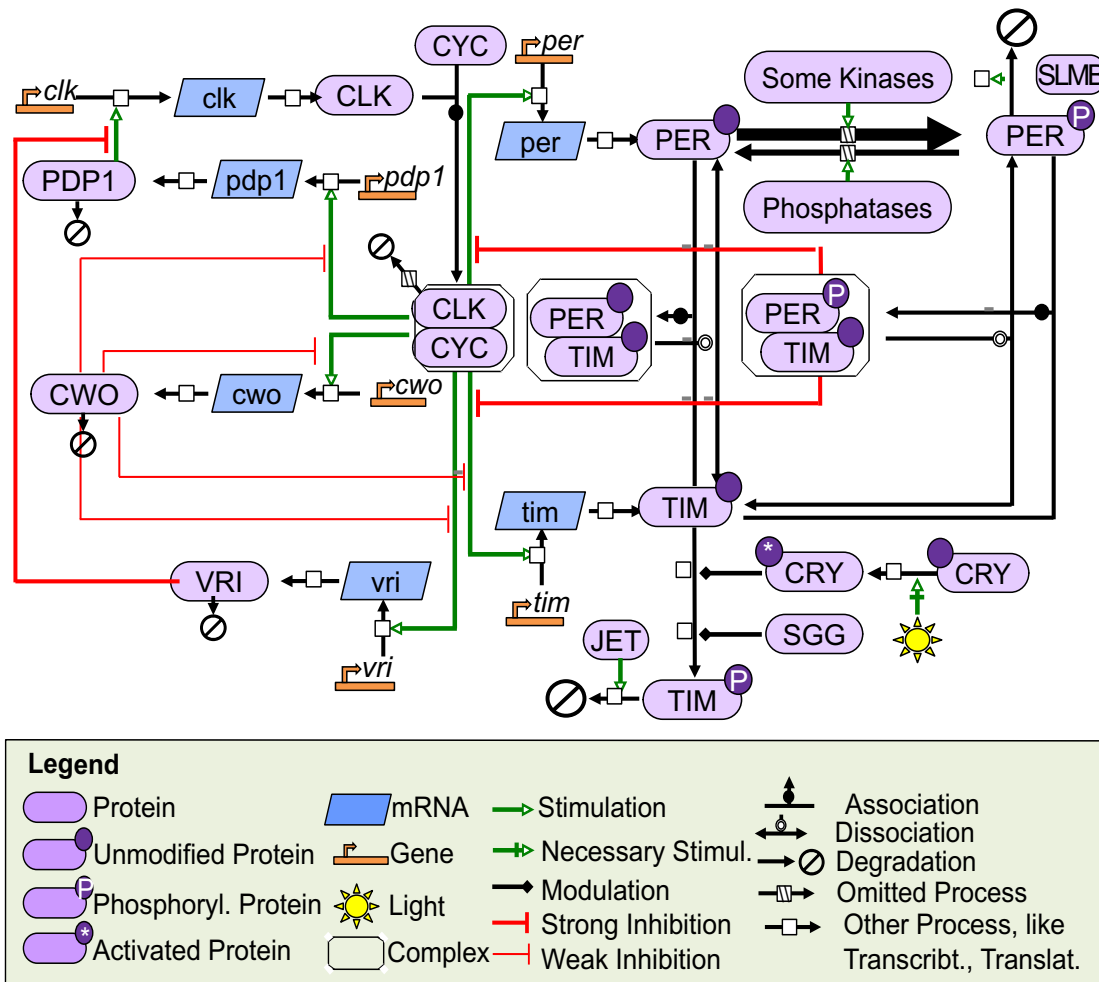

4  
5  
6  
7  
8  
9  
10  
11  
12  
13  
14  
15  
16

**FIGURE 1. Systems biology overview of the circadian clock in *D. melanogaster*.** This simplified diagram shows the basic components of the *D. melanogaster* circadian clock. In one feedback loop, CLK binds CYC and promotes the transcription of *per* and *tim*. The proteins PER and TIM then form a complex and repress this effect of CLK. Light activates CRY by inducing a conformational change (denoted by \*), and CRY and SGG work with JET to promote the degradation of TIM. Without TIM, PER is phosphorylated, interacts with SLMB, and is degraded. In a second feedback loop, the CLK/CYC complex promotes transcription of *pdp1*, *vri*, and *cwo*. PDP1 promotes transcription of *clk*, and VRI inhibits the action of PDP1. CWO weakly inhibits CLK-promoted transcription of *per*, *tim*, *vri*, *pdp1*, and itself. The notation in this diagram uses Systems Biology Graphical Notation Process Description level 1 version 1.3 (MOODIE *et al.* 2011), with minor modifications.

1 **FIGURE 2**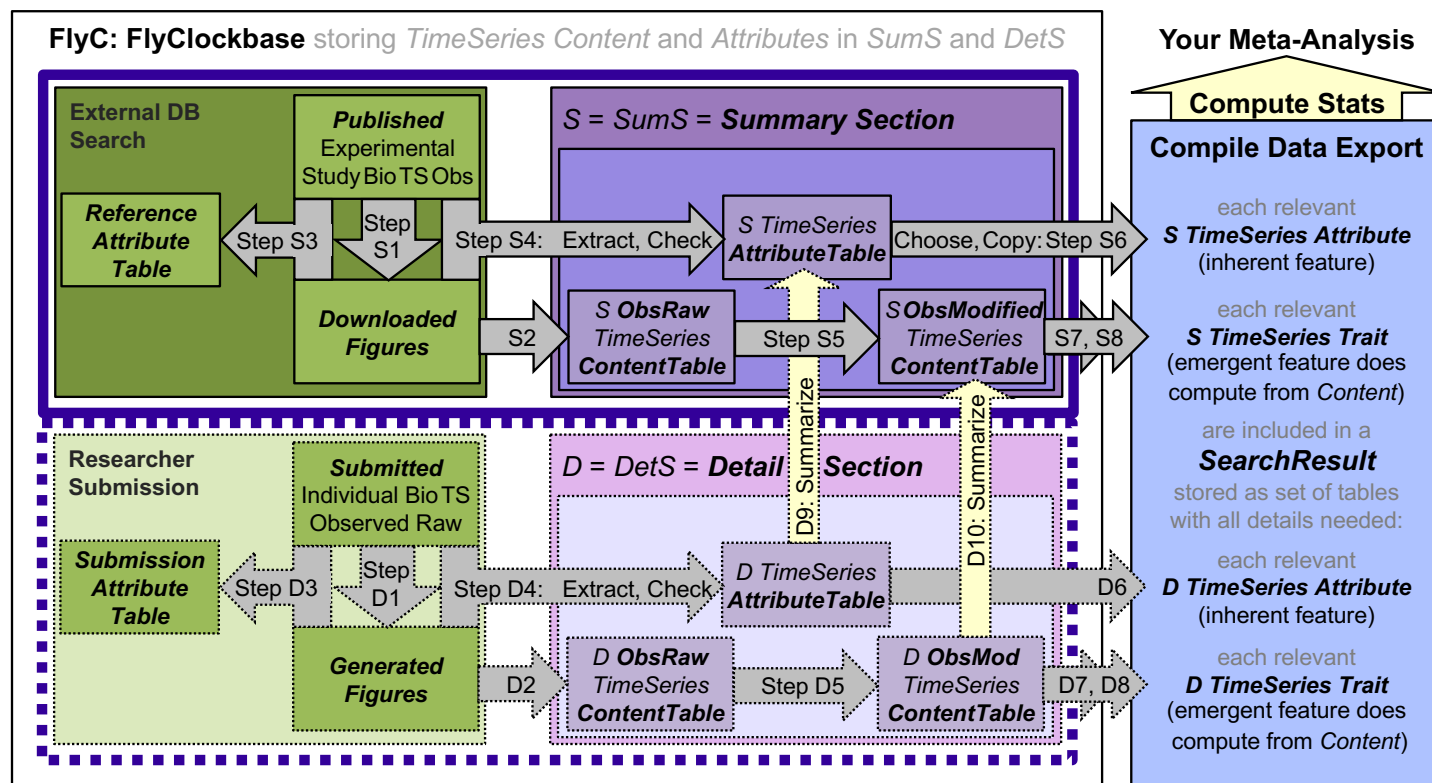

2

3

4 **FIGURE 2. Overview of FlyClockbase organization and data model.** We extracted as much  
 5 raw data and as many reported experimental details as possible from plotted time series  
 6 summary figures and their publications. We stored bibliographic information in the *References*  
 7 *AttributeTable* (Step S3) and stored figures as files ready for plot digitizing (Step S1). For  
 8 convenient reanalysis, we included all files of open access studies in FlyClockbase. From each  
 9 figure with appropriate Attributes we extracted the FlyClockbase *TimeSeries Content* (*TS*) itself  
 10 as *RawObservations* (*ObsRaw*, Step S2). *TS* report some measure of the number of molecules  
 11 of a given clock component as observed at a given time and in a given volume. The volume and  
 12 other scaling factors are usually unknown and may be non-linear on occasion. Here we assume  
 13 that amounts of *Obs TS* indicate a measure of relative abundance among neighboring amounts  
 14 of the same given *TS*. To place each *TS* in its appropriate context, we collected as many *TS*  
 15 *Attributes* as we could reasonably extract from the experimental details given in the original  
 16 study (Step S4). These *Attributes* are stored in the *SumS TS AttributeTables*.

17 To obtain the more refined *TS ContentTables ObsModified* (*ObsMod*), we rechecked the  
 18 data based on information in its associated publication (such as exact times of data collection,  
 19 Step S5). Time series in *SumS ObsRaw* were not refined into *ObsMod* if they were shorter than  
 20 six hours or if more than half of their values were missing or unreadable. All other *TS* were  
 21 copied and modified into *ObsMod* and used with their respective *Attributes* for further analyses,  
 22 ultimately aiming to produce a retrospective meta-analysis. To export the relevant data from

1 FlyClockbase requires a *SearchResult*, which includes the specified *Content*, *Attributes*, and  
2 computed *Traits* (stored in *TS TraitTables*). Such *SearchResults* could be compiled manually or  
3 automatically and are stored in a *TableSet*, which can include *TS TraitTables*. For the  
4 retrospective meta-analysis presented here we manually compiled *TS TraitTables* reporting one  
5 peak and one valley from each *ObsMod TS* measured in *CZT* (Steps S6, S7, S8). These peak-  
6 valley *TS TraitTables* are further processed in Figure 3. *Content* and *Attributes* for >400 *TS*  
7 derived from published studies are stored in the *Summary Section (SumS)*, which does not  
8 include raw experimental data of separately observed *TS*. These will be stored in *DetS*, the  
9 *Detail Section*, which is planned as an extension that will enable the submission and processing  
10 of more detailed and less summarized *ObsRaw TS Content* in order to enable researchers to  
11 compute their own independent summary statistics.  
12

1  
2 **FIGURE 3**  
3

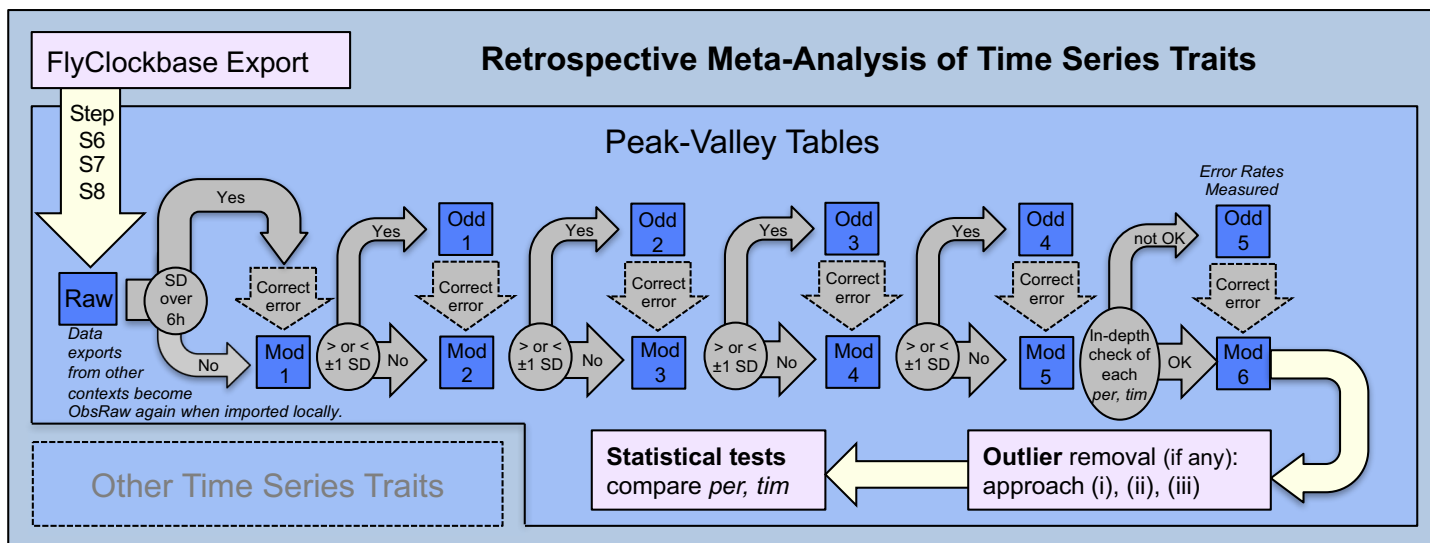

4  
5  
6 **FIGURE 3. Workflow for refining the time series traits reported in peak-valley-tables.**  
7 These tables represent a *SearchResult* (as in Figure 2) and contain a special set of *Traits* and  
8 *Attributes* extracted from FlyClockbase. In this study we extracted the times associated with the  
9 maximum ("Peak") and minimum ("Valley") amounts of the first each day of each time series.  
10 Each row of a peak-valley table contains a peak observation and a valley observation for one  
11 day of one time series, along with *Attributes* of interest. One peak-valley table was produced for  
12 each clock component of interest.

13 *Refinement of outliers (Mod1-Mod5).* The tables for each component formed a set that  
14 was refined together (from *Raw* → *Mod1* → ...etc.). *Raw PeakValleyTables* show data for every  
15 day of the time series, while all *Modified ("Mod") PeakValleyTables* only show data for the first  
16 day of the time series. To start identifying outliers and potential errors in these tables, we  
17 searched for clock components in which the *SD* for peak, valley, or both exceeded 6 hours. We  
18 examined these clock components more closely and corrected errors to create the first  
19 collection of modified *PeakValleyTables* ("*Mod1*"). We chose  $SD = 6$  as initial cutoff value, since  
20 it approximates a uniform random distribution over all 24 hours (to us a sign of problems in  
21 correctly identifying the right values. For each modified peak-valley table in *Mod1*, we then  
22 calculated the *SD* and mean for peaks and valleys. Individual time series observations outside  
23 of the mean  $\pm 1 SD$  were noted for further investigation and recorded in a peak-valley table  
24 reserved for these "Odd" values ("*Odd1*"). We examined *Odd* values for potential errors that we  
25 knew could be caused by data handling in FlyClockbase and corrected them appropriately to  
26 create the next set of modified *PeakValleyTables* ("*Mod2*"). We repeated this process until we  
27 created *Odd5* and *Mod5*. Refinement up to this point was geared towards checking statistical  
28 outliers for errors in handling data or determining traits (in contrast to our error analysis below).

1            *Human Error Analysis Context.* When the refinement process was first mapped out, the  
2 plan was to stop at *Mod5* and use this repeatedly refined dataset for calculating the final  
3 analyses of PER and TIM. Since the curators were diligent motivated researchers aware of  
4 potential errors and carefully working to avoid them, there was no expectation that substantial  
5 numbers of errors could still lurk beneath the surface. Due to the importance of our conclusions  
6 for modeling the differences in stochasticity of PER and TIM we decided to still review all  
7 FlyClockbase data before finalizing the statistical analysis of the main result of this paper. We  
8 started our review with several random tests, manually conducted on the spot. These detected  
9 enough errors to justify a more systematic approach. We decided to avoid shortcuts and focus  
10 on an exclusive complete in-depth re-review of all those time series in FlyClockbase where  
11 errors in our data handling or trait computation could have affected our conclusions about the  
12 peak or valley timing of *per* mRNA, *tim* mRNA, *PER* protein, and *TIM* protein.

13            *Errors tested* included the following notable cases. (i) Peaks and valleys from maxima  
14 and minima at the margins of brief time series were probably not genuine, as they would have  
15 been unlikely to coincide with the start or stop of time series observations. Excluding these  
16 substantially reduced the variance we observed. (ii) The first day was non-representative in  
17 some important respect. If peak or valley times during day 1, our usually monitored interval,  
18 were noticeably different from subsequent days, we concluded that measurements probably  
19 started too early and used the peak and valley from a day that followed closely. (iii) On rare  
20 occasions fields in FlyClockbase had been swapped or misprocessed in some way.

21            *Benefits.* While laborious, this effort payed off in multiple ways (see Results and  
22 Discussion): (i) It greatly increased confidence in our PER-TIM peak time variance analyses;  
23 see Results. (ii) We manually identified particularly extreme outliers not caused by errors on our  
24 side. This motivated us to analyze their impact by defining ‘outlier removal approach (ii)’ and  
25 choose more systematic outlier removal approaches; see Statistical Methods; see Discussion  
26 for potential implications. (iii) FlyClockbase now has an internal human error analysis, see  
27 Results. Error rates might be extrapolated to non-*per/tim* components or other *VBIRs* of  
28 comparable complexity. Currently not many opportunities exist for measuring real-world human  
29 error rates in advanced data organization scenarios. (iv) Valuable lessons in automation and  
30 *VBIR* compiler construction were learned as a compiler architect worked closely with expert  
31 curators during manual error identification. Such manual work is necessarily the first step  
32 towards automation of such checks in a corresponding *VBIR* compiler infrastructure as  
33 envisioned in the Discussion.

34            *Datasets of interest.* *Mod6* is the most refined set of observations with the highest quality  
35 produced by this study and was used as the basis for all biological analyses presented here. It  
36 was produced by correcting in *Mod5* all errors in the data handling or trait calculation of *per*, *tim*,  
37 PER or TIM, while copying all data for other clock components unchanged from *Mod5*. The  
38 dataset *ObsMod7* is essentially identical to *ObsMod6*, except for replacing a few cells in the  
39 table that were not analyzed here, but caused problems when R parsed the file. *ObsMod8* is  
40 identical to *ObsMod7*, except for manual removal of the manually identified outliers (see outlier  
41 removal approach (ii) in Statistical Methods). *ObsMod7* and *ObsMod8* are provided with the R-  
42 source-code archive in the Supplemental Material.

1 **FIGURE 4**

2

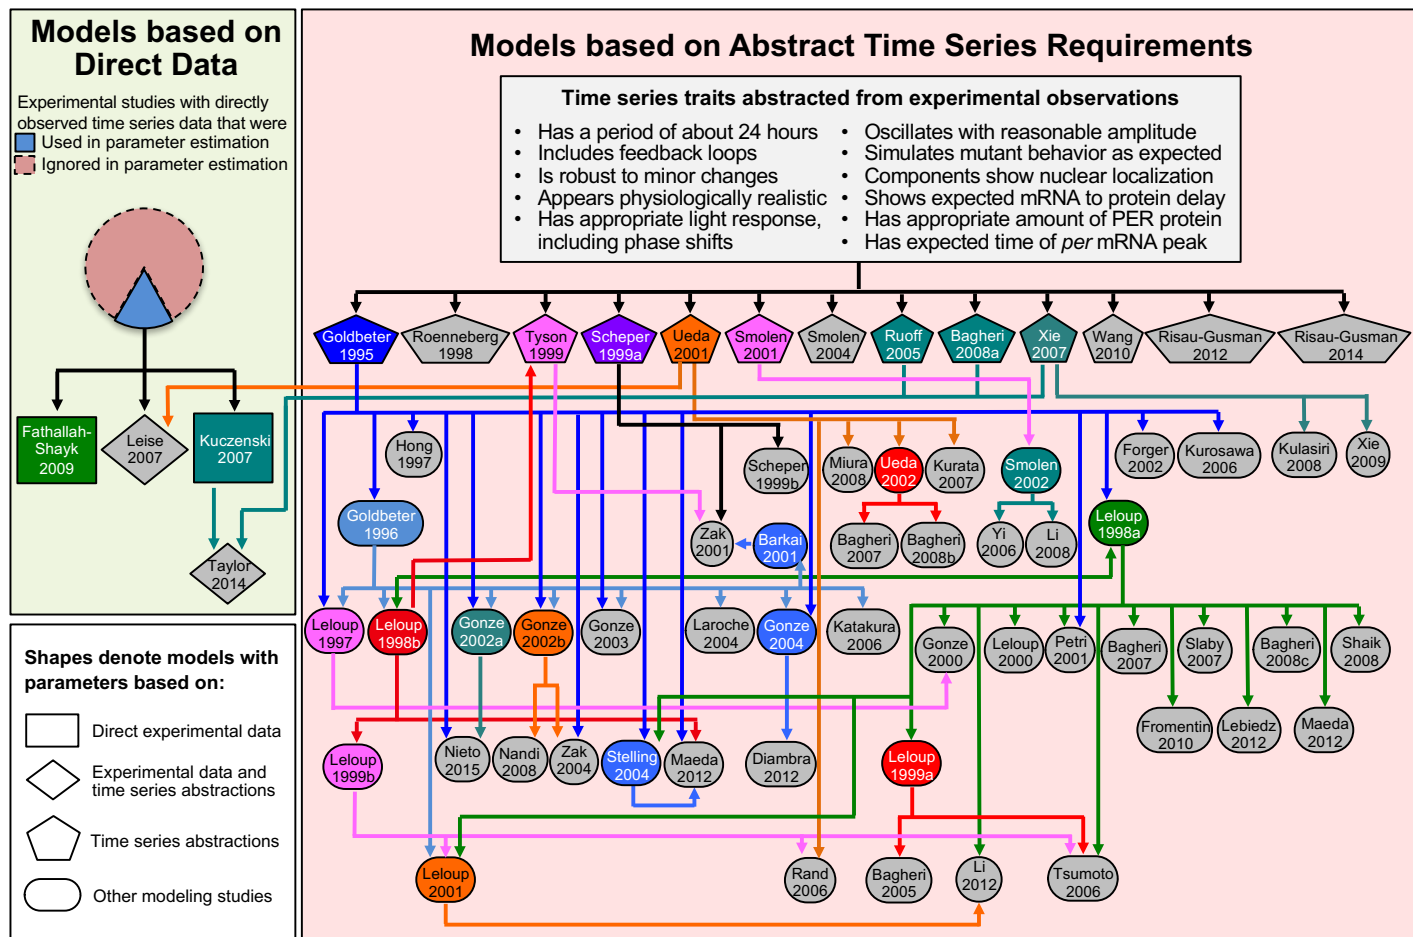

3

4 **FIGURE 4. Where do models get their realism from? Overview of data sources reported.**

5 Surprisingly few experimentally observed time series are used for estimating parameters in *D.*  
6 *melanogaster* circadian clock simulation studies. We reviewed 66 modeling studies identified  
7 here by AuthorYear. Only three of these did estimate parameters directly from full time series  
8 observed in experiments (using only 14 of the 86 experimental studies included in  
9 FlyClockbase). These three studies (and one that used their results) are denoted on the left by  
10 rectangles and rhombuses. The pie chart above them illustrates how many experimental studies  
11 were used (blue, solid line, 14) or ignored (pink, dashed line, 72) by modelers. The 13 studies  
12 represented by pentagons chose the simpler (but not simple) approach of searching for clock  
13 parameter combinations that satisfied some of the abstract time series requirements such as  
14 period length, see gray inset box. The 49 ovals represent models with parameters mostly or  
15 entirely based on the work of other models. Colored shapes represent models that informed the  
16 parameters of other models, where arrows of the same color connect the original and the  
17 subsequent models it informs (gray indicates that a model was not yet used for parameterizing  
18 other models).

19

FIGURE 5

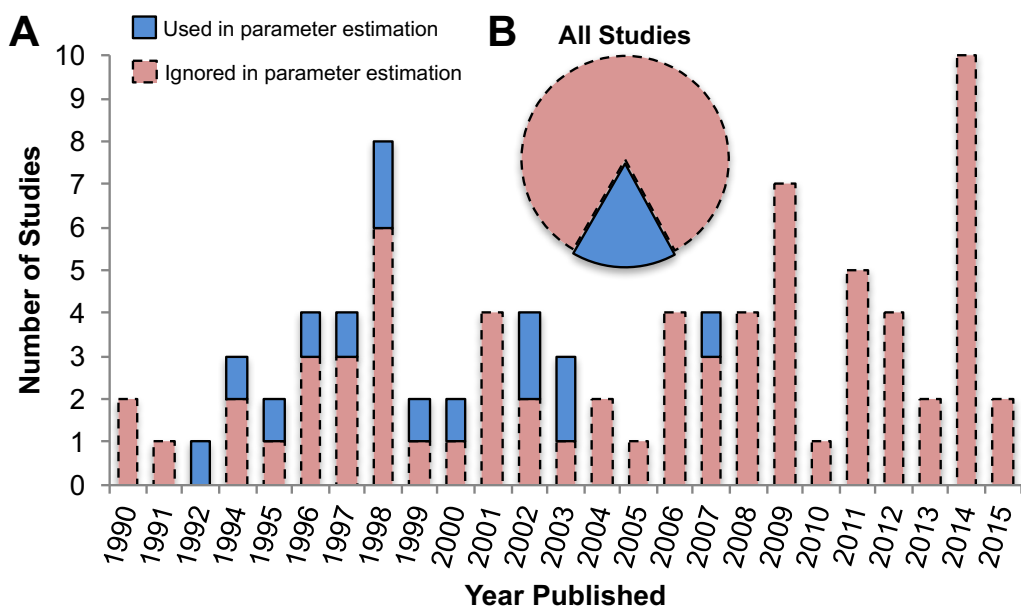

**FIGURE 5. Data accumulation over time: overview of experimental studies available in FlyClockbase and their use for parameter estimation over time. (A)** All studies in

FlyClockbase are displayed based on the year they were published. Most studies have not yet been used to inform model parameters (pink dashed line bars). **(B)** Summary of studies that were later used for parameter estimation are shown as blue solid line bars. These 14 studies are given (HARDIN *et al.* 1992; ZENG *et al.* 1994; SEHGAL *et al.* 1995; MARRUS *et al.* 1996; SO AND ROSBASH 1997; BAE *et al.* 1998; LEE *et al.* 1998; BLAU 1999; BAE *et al.* 2000; KIM *et al.* 2002; SHAFER *et al.* 2002; CYRAN *et al.* 2003; GLOSSOP *et al.* 2003; KADENER *et al.* 2007) and come from the richer collection of 86 studies reported in version variant QQv1 of FlyClockbase: (HARDIN *et al.* 1990; ZERR *et al.* 1990; ZWIEBEL *et al.* 1991b; HARDIN *et al.* 1992; HARDIN 1994; SEHGAL *et al.* 1994; ZENG *et al.* 1994; SEHGAL *et al.* 1995; VAN GELDER *et al.* 1995; BRANDES *et al.* 1996; MARRUS *et al.* 1996; QIU AND HARDIN 1996; VAN GELDER AND KRASNOW 1996; MAJERCAK *et al.* 1997; ROUYER *et al.* 1997; SO AND ROSBASH 1997; STANEWSKY *et al.* 1997; BAE *et al.* 1998; CHENG *et al.* 1998; DARLINGTON *et al.* 1998; EMERY *et al.* 1998; HAMBLEN *et al.* 1998; KLOSS *et al.* 1998; LEE *et al.* 1998; STANEWSKY *et al.* 1998; BLAU 1999; ISHIKAWA *et al.* 1999; BAE *et al.* 2000; ROTHENFLUH *et al.* 2000b; BAO *et al.* 2001; CLARIDGE-CHANG *et al.* 2001; McDONALD *et al.* 2001; OKADA *et al.* 2001; KIM *et al.* 2002; SHAFER *et al.* 2002; STANEWSKY *et al.* 2002; UEDA *et al.* 2002; AKTEN *et al.* 2003; CYRAN *et al.* 2003; GLOSSOP *et al.* 2003; DISSEL *et al.* 2004; MAJERCAK *et al.* 2004; GLASER AND STANEWSKY 2005; CHEN *et al.* 2006; KOH *et al.* 2006; WIJNEN *et al.* 2006; YU *et al.* 2006; FANG *et al.* 2007; KADENER *et al.* 2007; MATSUMOTO *et al.* 2007; MUSKUS *et al.* 2007; KIVIMÄE *et al.* 2008; MEISSNER *et al.* 2008; PESCHEL 2008; YOSHII *et al.* 2008; DUBRUILLE *et al.* 2009; KADENER *et al.* 2009; LEAR *et al.* 2009; PESCHEL *et al.* 2009; WULBECK *et al.* 2009; YOSHII *et al.* 2009; ZHENG *et al.* 2009; KULA-EVERSOLE *et al.* 2010; CHEN *et al.* 2011; CHIU *et al.* 2011; ITOH *et al.* 2011; LAMAZE *et al.* 2011; LIM *et al.* 2011; GRIMA *et al.* 2012; HUGHES *et al.* 2012; KUMAR *et al.* 2012; LI AND ROSBASH 2013; RODRIGUEZ *et al.* 2013; HERMANN-LUIBL *et al.* 2014; LAMBA *et al.* 2014; LEE *et al.* 2014a; OH *et al.* 2014; PEGORARO *et al.* 2014; SHI *et al.* 2014; SIMONI *et al.* 2014; SUBRAMANIAN *et al.* 2014; WEISS *et al.* 2014; ZHENG *et al.* 2014; ABRUZZI *et al.* 2015; MA *et al.* 2015).

1 **FIGURE 6**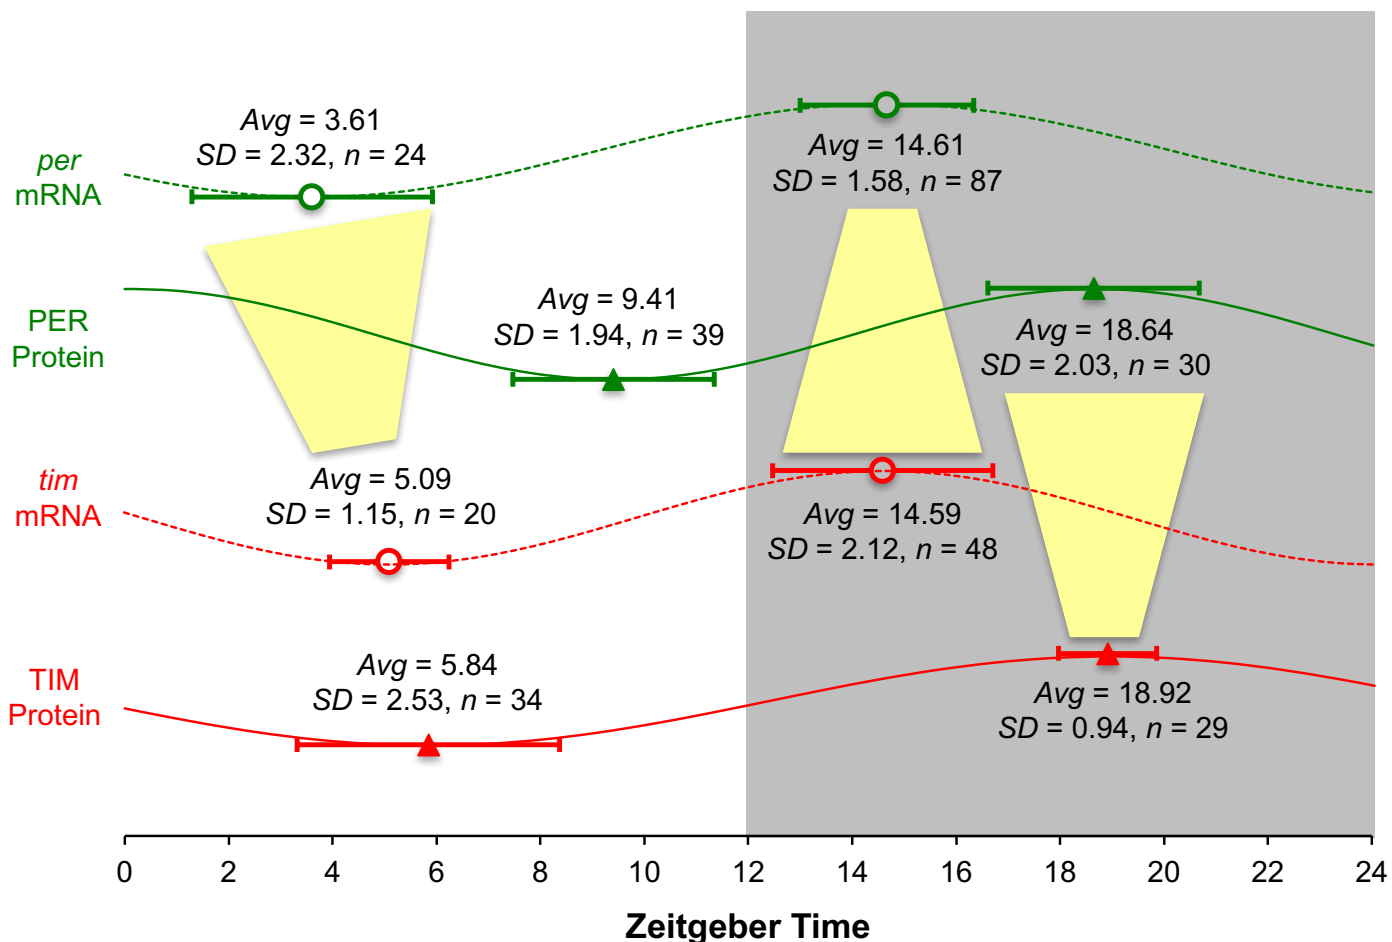

2  
3  
4 **FIGURE 6. Hypotheses on timing variances in PER and TIM as tested by**  
5 **FlyClockbase data, which extends our understanding of circadian clocks in flies**  
6 **by enabling observations of significant differences in variance between peaks**  
7 **and valleys of different clock components.**

8  
9 Here we summarize results from comparing mRNAs and proteins of *per* and *tim*. Yellow  
10 funnels highlight changes in respective variances between timing traits of *per* and *tim*  
11 that are not negligible (over 5% of  $10^5$  bootstraps of available data reject the  
12 correspondingly customized null-hypothesis  $H_{basic}$  that variances are equal). For related  
13 analyses see also Table 6, Table 7, Figure 7, Table 4, Table S1 and parts of the  
14 Supplemental Statistical Analysis. Overall, the summary statistics for the timing of peaks  
15 and valleys of the mRNAs and proteins of *per* and *tim* are consistent with our current  
16 understanding of the *D. melanogaster* circadian clock.



1           Open circles with dashed curves indicate mRNAs, and filled triangles with solid  
2 curves represent proteins; *per* (green) is shown in the top two, and *tim* (red) in the  
3 bottom two curves, all adjusted to fit locations of peaks and valleys within one cycle.  
4 Averages and *SDs* were calculated for *CZT* times, linearized as described in Materials  
5 and Methods, and then back-transformed to *DZT* (if differences existed as in the rare  
6 cases where day 1 of a time series was unusable).

7           The statistics shown report summaries for the *n* remaining time series after  
8 removing outliers by applying the method of Carling (2000) to the data in the *TraitTables*  
9 compiled from the time series observations in FlyClockbase and refined as described  
10 for '*Mod6*' in Figure 3. Histograms of the data summarized here are shown in Figure 7  
11 as '*CoreData*' and statistical results testing the significance of differences are reported  
12 in Table 6, the text of the Results Section, and in the Supplemental Statistical Analysis  
13 (automatically produced by the R script provided as Supplemental Material). Table 4  
14 and Table S1 present related results from an independent statistical analysis of the  
15 same data that was completely implemented using only spread-sheet software. While  
16 the results shown in this figure and the underlying outlier analysis were performed in R,  
17 the input dataset *Mod6* analyzed by the R script was produced using spread-sheets.  
18

1 **FIGURE 7:**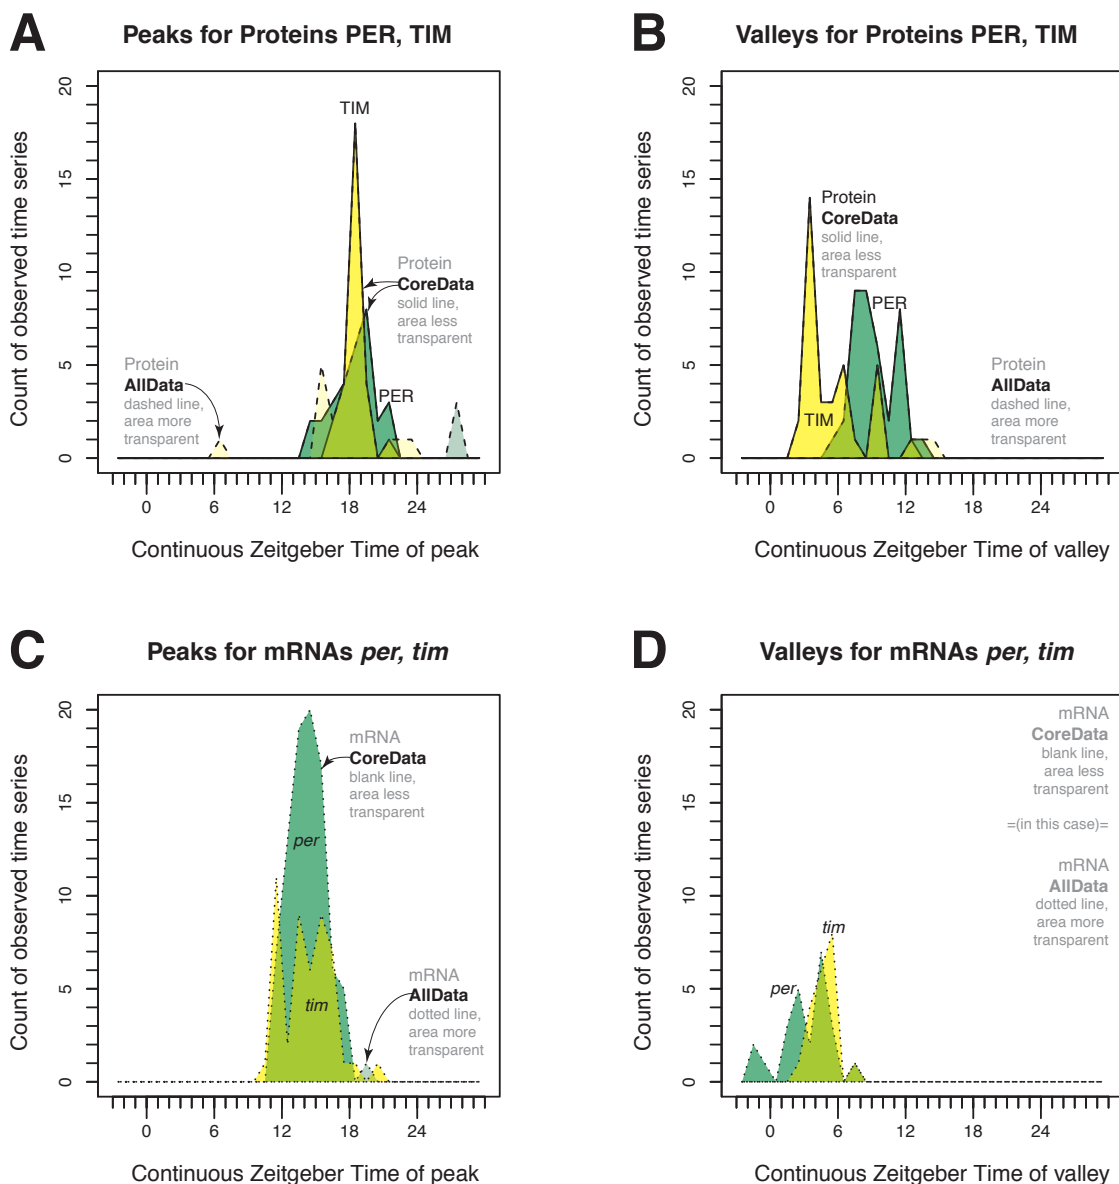

2  
3  
4 **FIGURE 7. Histograms for *per* and *tim* mRNA and protein time series traits like**  
5 **peaks and valleys as observed in independent experiments show how**  
6 **FlyClockbase enables comparing variability.** Here we compare the variability of  
7 timing for peaks (A, C) and valleys (B, D) of the proteins (A, B) and mRNAs (C, D) for  
8 the genes *per* (green) and *tim* (yellow). For all panels (A-D), we provide overlapping  
9 transparent histograms of all data (more transparent, dashed or dotted line) and of the  
10 core dataset from which outliers were removed by a boxplot method with Carling's  
11 modification (less transparent, solid or no line). Descriptive summary statistics of the  
12 'CoreData' distributions (excluding outliers) are given in Figure 6 and measures of

1 statistical significance of differences are reported in Table 6 of the Results Section, and  
2 in the Supplemental Statistical Analysis (the annotated PDF of plots that were auto-  
3 generated by the script that also produced the plots in this figure; for an overview of  
4 calculations in the script, see Statistical Methods; for details, see R code in  
5 Supplemental Material). We assessed the impact of manually identified rare extreme  
6 outliers by excluding them from a copy of the dataset (termed “NoXtremes”) for which  
7 we repeated all analyses, including R’s automated outlier detection using Carling’s  
8 modification; the results are not substantially different and are reported in the  
9 Supplemental Statistical Analysis. For other related analyses see also Table 6, Table 7,  
10 Figure 6, Table 4, and Table S1.

11

12

13

1 **FIGURE 8:**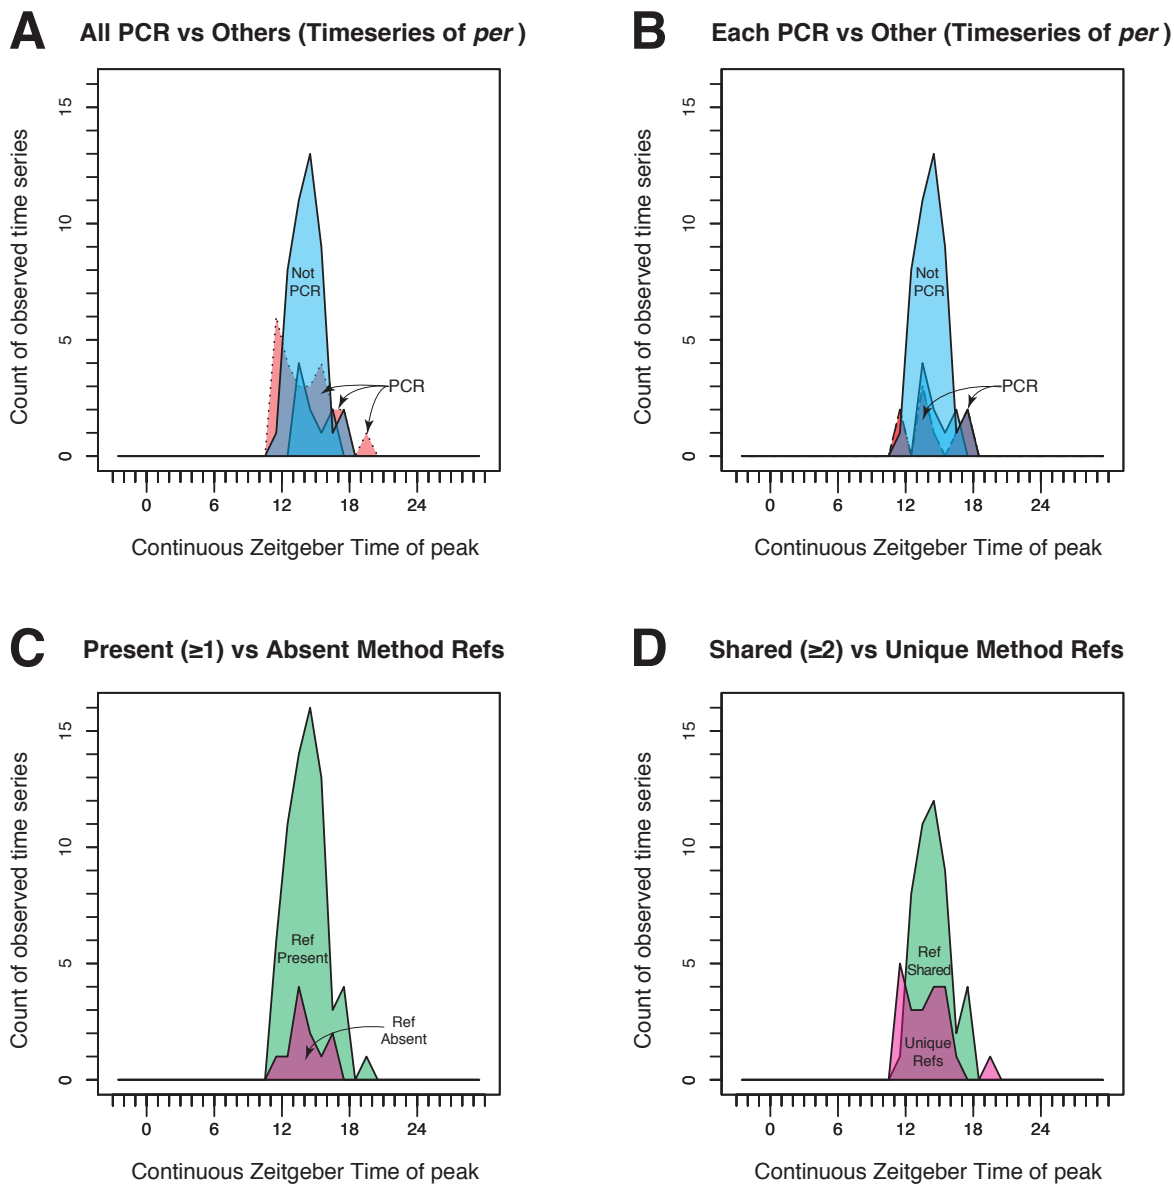

2  
3  
4  
5 **FIGURE 8. Comparisons of PCR vs non-PCR methods for measuring amounts of**  
6 ***per* mRNA in time series as enabled by FlyClockbase.** Here we compare the  
7 variability of peak timing in all available time series of *per* mRNA without grouping by  
8 study, in order to contrast distributions of peak times obtained from time series (A)  
9 observed by all PCR methods combined (red) vs (blue) all non-PCR methods combined  
10 (blue); (B) observed by different PCR methods like qPCR or RT-PCR individually (red)  
11 vs (blue) all non-PCR methods combined (blue); (C) observed in studies citing at least  
12 one method reference (green) vs (purple) studies with no method reference (purple);

1 and (D) observed in studies sharing two or more method references (green) vs (purple)  
2 studies with method references unique among studies contributing to *per* mRNA  
3 observations in FlyClockbase (*and* citing at least one method reference, purple). For all  
4 panels (A-D), we provide overlapping transparent histograms. Measures of statistical  
5 significance of differences are reported in the Results Section and parts of the  
6 Supplemental Statistical Analysis. For related data and analyses see also Table 8,  
7 Figure 9, and Figure 10.

8  
9



1 **FIGURE 9. Referenced protocol use similarity matrix for studies reporting *per***  
2 **mRNA time series, grouping protocols by measurement approach.** The vertical  
3 axis shows time series IDs of *per* mRNA time series grouped by broader measurement  
4 method, and the horizontal axis indicates the experimental protocols references cited.  
5 The numbers given in the table for each time series and reference refer to a  
6 classification key indicating which of several broader types of methods had been used  
7 (1 – RNA extraction; 2 – Expression analysis; 3 – SYBR green detection protocol; 4 –  
8 RNA quantification; 5 – RNA purification; 6 – serial dilutions; 7 – controls; 8 – general  
9 protocol; 9 – probes; 10 – hybridization, RNase digestion, electrophoretic product  
10 separation; 11 – dissection; 12 – transfer to gel, labeling probes, hybridization, washing;  
11 13 – PCR for cDNA library). Boxes shaded in gray represent the references cited by  
12 each time series, and the numbers in the gray boxes correspond to the broader types of  
13 methods to which this specific part of a protocol reference belongs. Gray boxes shaded  
14 in the “no reference” column indicate time series from studies without method  
15 references. All time series from the same study measured with a given method are  
16 outlined in dark grey. For related data and analyses see also Table 8, Figure 8, Figure  
17 10, and parts of the Supplemental Statistical Analysis. Table 8 provides summaries of  
18 counts of time series and studies based on information in this table. The details of  
19 experimental protocols are described in their respective references (OLIVER AND PHILLIPS  
20 1970; KONOPKA AND BENZER 1971; CATHALA *et al.* 1983; ZINN *et al.* 1983; OCONNELL AND  
21 ROSBASH 1984; THEURKAUF *et al.* 1986; CHOMCZYNSKI AND SACCHI 1987; CITRI *et al.*  
22 1987; LORENZ *et al.* 1989; SAMBROOK *et al.* 1989; HARDIN *et al.* 1990; ZWIEBEL *et al.*  
23 1991a; HARDIN AND HALL 1992; HARDIN 1994; SEHGAL *et al.* 1994; ZENG *et al.* 1994;  
24 SEHGAL *et al.* 1995; VAN GELDER *et al.* 1995; MARRUS *et al.* 1996; MYERS *et al.* 1996;  
25 MAJERCAK *et al.* 1997; STANEWSKY *et al.* 1997; ALLADA *et al.* 1998; BAE *et al.* 1998;  
26 CHENG *et al.* 1998; EMERY *et al.* 1998; PRICE *et al.* 1998; SIDOTE *et al.* 1998; STANEWSKY  
27 *et al.* 1998; MAJERCAK *et al.* 1999; CERIANI *et al.* 2002; GRIMA *et al.* 2002; UEDA *et al.*  
28 2002; MENET *et al.* 2010; NAGOSHI *et al.* 2010; ABRUZZI *et al.* 2011; KHODOR *et al.* 2011;  
29 RODRIGUEZ *et al.* 2013).

1 **Figure 10**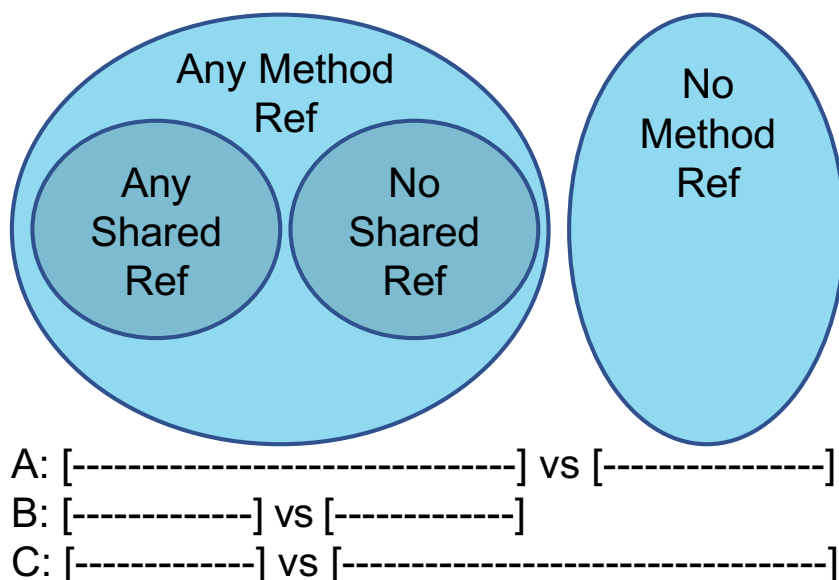

**FIGURE 10: Logic of datasets in statistics: example for an interaction of statistics and formal logic where the logic for selecting datasets unnecessarily reduced the power of a statistical test.**

Here we illustrate the logic we used for constructing the datasets that group observed time series into the sets used for approximating the degree of method standardization and method similarities that produced the per mRNA time series observations in FlyClockbase. We denote as ‘any’ an individual time series from an individual study with a count of references to experimental protocols, where the count is  $\geq 1$ ; ‘no’ stands for a count of 0. Grouping **A** and **B** indicate test groupings performed by the R script in the Supplemental Material. Grouping **C** indicates the grouping suggested by a more thorough logical analysis performed after completing the statistical tests presented in the Results Section. For related data and analyses see also Table 8, Figure 8, Figure 9, and parts of the Supplemental Statistical Analysis.



1 **FIGURE 11**

2

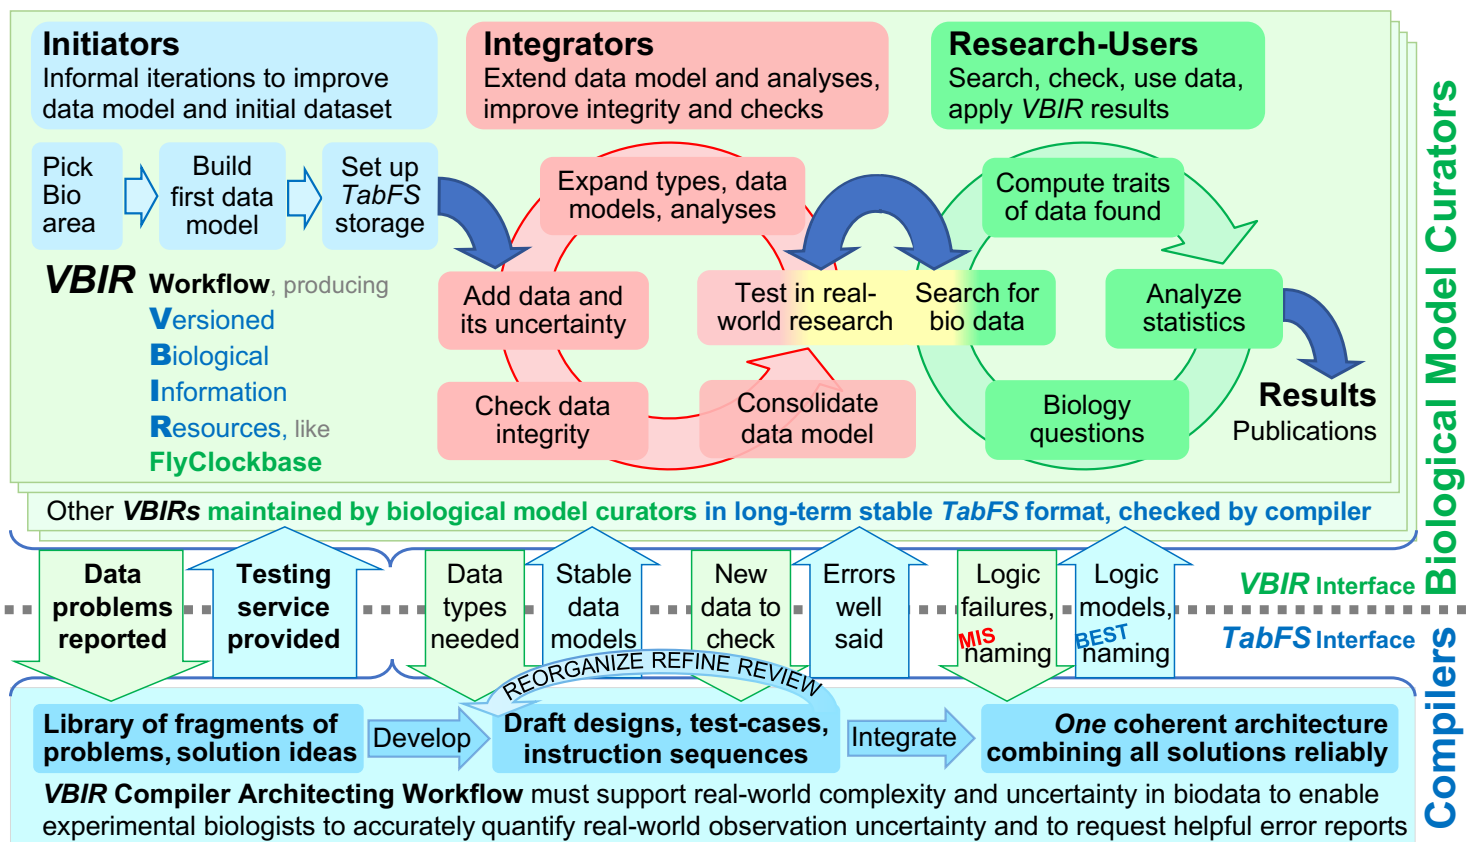

3

4 **FIGURE 11: Biological model curator and compiler architect collaboration model**  
 5 **for improving the integration of biological data into VBIRs while constructing the**  
 6 **type system required by a VBIR compiler for handling the ubiquitous uncertainty**  
 7 **of biological data more precisely.**

8 Here we show how biological model curators and compiler builders can  
 9 collaborate by depicting important aspects of the trans-disciplinary interactions that led  
 10 to the construction of FlyClockbase, a versioned biological information resource (VBIR).  
 11 We have been using our compiler expertise to inform fundamental decisions about  
 12 conceptual data structures and file formats in FlyClockbase and TabFS (designed  
 13 simultaneously, all formal definitions are beyond the scope of this paper).

14 **Division of work.** We divided work among domains as indicated by the dotted  
 15 line. Above, biological model curators worked with a focus on constructing and using  
 16 FlyClockbase in order to understand the circadian clock of *Drosophila*. On the other side  
 17 was the compiler architect focusing on TabFS data structures and the logic necessary  
 18 for representing the biological data collected by the curators for FlyClockbase.

19 **Mutual benefits.** Designs were chosen such that implementing the TabFS  
 20 compiler logic remained as simple as possible, while enabling formal tests of the

1 integrity of *VBIR* data. In the present study, we developed many of the designs  
2 necessary for automation by manually pioneering important tasks. Doing so in a real-life  
3 research system of non-trivial complexity was important; this allowed us to explore  
4 many real-world details with substantial anticipated impacts on future use. The  
5 biological model curators focused on integrating and analyzing time series; this often  
6 enabled them to readily provide the compiler architect with detailed advance information  
7 about important use-cases and likely problems. The compiler architect could then  
8 evaluate potential design options long before implementation could start. This allowed  
9 for iterative reviews from several perspectives and with substantial time for analysis. It  
10 also resulted in a *VBIR* design and compiler logic that substantially complement each  
11 other and are thus prepared for automated testing of *VBIR* data integrity by following a  
12 number of simple rules.

13 **Collaborative exchanges** of insights at the dotted *VBIR-TabFS* compiler  
14 interface are exemplified as broad arrows, indicating some important discussion topics  
15 (in terms closer to computer science for brevity; our actual discussions were informal  
16 and used vocabulary closer to biology). Our trans-disciplinary communication interface  
17 required both the high-level aspects of human collaboration and the low-level aspects of  
18 technical information exchange. The information flows shown here critically depend on  
19 biological model curators with a deep understanding of, and passion for, the details of  
20 state-of-the-art biology. Their expertise is essential for defining the boundaries of the  
21 system that is being modeled. While working to quantify its uncertainties properly in the  
22 *VBIR*, the biologists must be committed to bringing all potential problems of  
23 interpretation to the attention of the architect of a compiler, which is being designed to  
24 meet the formal needs of the *VBIR*. The architect must be able to select an appropriate  
25 mathematical logic formalism for representing the relevant biological problems in  
26 meaningful ways. The team needs excellent trans-disciplinary communication skills for  
27 efficiently describing, checking, and negotiating the uncounted decisions that  
28 collectively generate the systematic organization of an efficient *VBIR*. This requires a  
29 high sensitivity for the diffuse difficulties of accurately capturing computationally the  
30 uncertainties and contradictions in biological observations encountered while  
31 constructing a *VBIR*. Such biological problems require an appropriate logic formalism  
32 and thus need to be seen by the compiler architect, irrespective of perceived severity.

33 **Traps.** Avoiding do-it-yourself analyses of ‘simple problems’ by non-  
34 computational biologists is important for protecting against deceptive simplicity. It may  
35 not be possible to solve such problems on desirable timelines; still, compiler developers  
36 have better chances of spotting the dangerous costly bugs they can cause, which helps  
37 to identify solutions (that may already exist for other reasons). For example, quantifying  
38 uncertainty with the cutting-edge logic formalism known as ‘fuzzy plurivaluationism’  
39 enables the representation of both semantic indeterminacy *and* various degrees of truth  
40 (SMITH 2008); ‘BioBinaries’ extend Boolean logic in similar ways (see Supplemental

1 Material). It often takes a trained eye to spot the need for a richer logic and it can be  
2 particularly hard to hunt logic errors that omit the possibility of some options (PANKO  
3 2016). Finding an appropriate logic formalism is pivotal, because it is impossible to  
4 compute without assumptions about logic. Computers always produce logical answers,  
5 no matter how flawed their logic might be when interpreted by humans in a real-world  
6 context. Such problems are most efficiently addressed at the compiler level by enforcing  
7 an ‘appropriate’ type system. Naturally, related discussions revolve around how to  
8 define ‘appropriate common sense’.

9 **Progress in defining type systems** used for representing a biological system  
10 must be driven by those biologists who study the respective biology; to help them  
11 capture type defining ideas, we use the TabFS storage system of nested folders and  
12 tables which biologists can easily navigate using common operating systems and  
13 spreadsheet tools (see main text).

14 **Cost of constructing VBIRs without an appropriate compiler.** In contrast,  
15 without the appropriate logic and the equivalent of TabFS built into a corresponding  
16 VBIR compiler, it will still be necessary for each VBIR to construct, find or develop  
17 corresponding tools if quality is important. Unfortunately, economies of scale will be  
18 missing in this case, resulting in greatly reduced quality at greatly increased cost. Thus,  
19 developing VBIRs on a shoe-string budget will either limit VBIRs to comparatively  
20 simple datasets (thereby excluding much of biology) or is likely to trigger many rushed  
21 decisions about underpinning logic. We found that correspondingly simplistic type  
22 systems easily frustrate non-computing biologists by expecting them to coerce observed  
23 data and its uncertainties into an inappropriate logic (demanding a precision not  
24 provided by the data). This results in biases that are often near-impossible to detect,  
25 quantify, or exclude (e.g. by testing whether coercion indeed occurred). Thus,  
26 representing biological data in programming languages that do not readily support an  
27 appropriate logic can easily generate misleading code. It is possible in theory to work  
28 around such deficiencies. However, in practice, such logic mismatches often trigger  
29 huge costs to be paid after indeterminate times. This is particularly true if such logic has  
30 to be developed without the necessary time, logic expertise and compiler tools. As many  
31 professional programmers know from their own experience, “premature optimization is  
32 the root of all evil” (KNUTH 1974). This principle readily translates to premature choices  
33 of a logic formalism for representing a biological system, prematurely chosen type  
34 systems, the premature optimization of implementation speed and others that create  
35 numerous problems in computational biology. It is thus conceivable that a substantial  
36 contribution towards the notoriously difficult task of funding VBIR development might  
37 come from the construction of a compiler that simplifies these complex decisions by  
38 offering solutions that can represent biological information and uncertainty more easily.

39 **Conclusions for FlyClockbase.** Accordingly, we have been designing the  
40 FlyClockbase type system for maximizing simplicity and radical openness, allowing all

1 users to easily suggest necessary expansions (simply by changing cells in table text  
2 files of TabFS). Such suggestions still require review by a *VBIR* architect with expertise  
3 in formal type systems. However, more eyes are likely to identify more type-system  
4 challenges and might thus inspire better solutions. As indicated in the figure, many  
5 solutions are fragmented at first, and larger designs emerge later. Still, the ultimate  
6 integration goal for each *VBIR* is to find a single coherent architecture that is “as simple  
7 as possible, but not simpler” (EINSTEIN AND CALAPRICE 2011).

8  
9  
10  
11

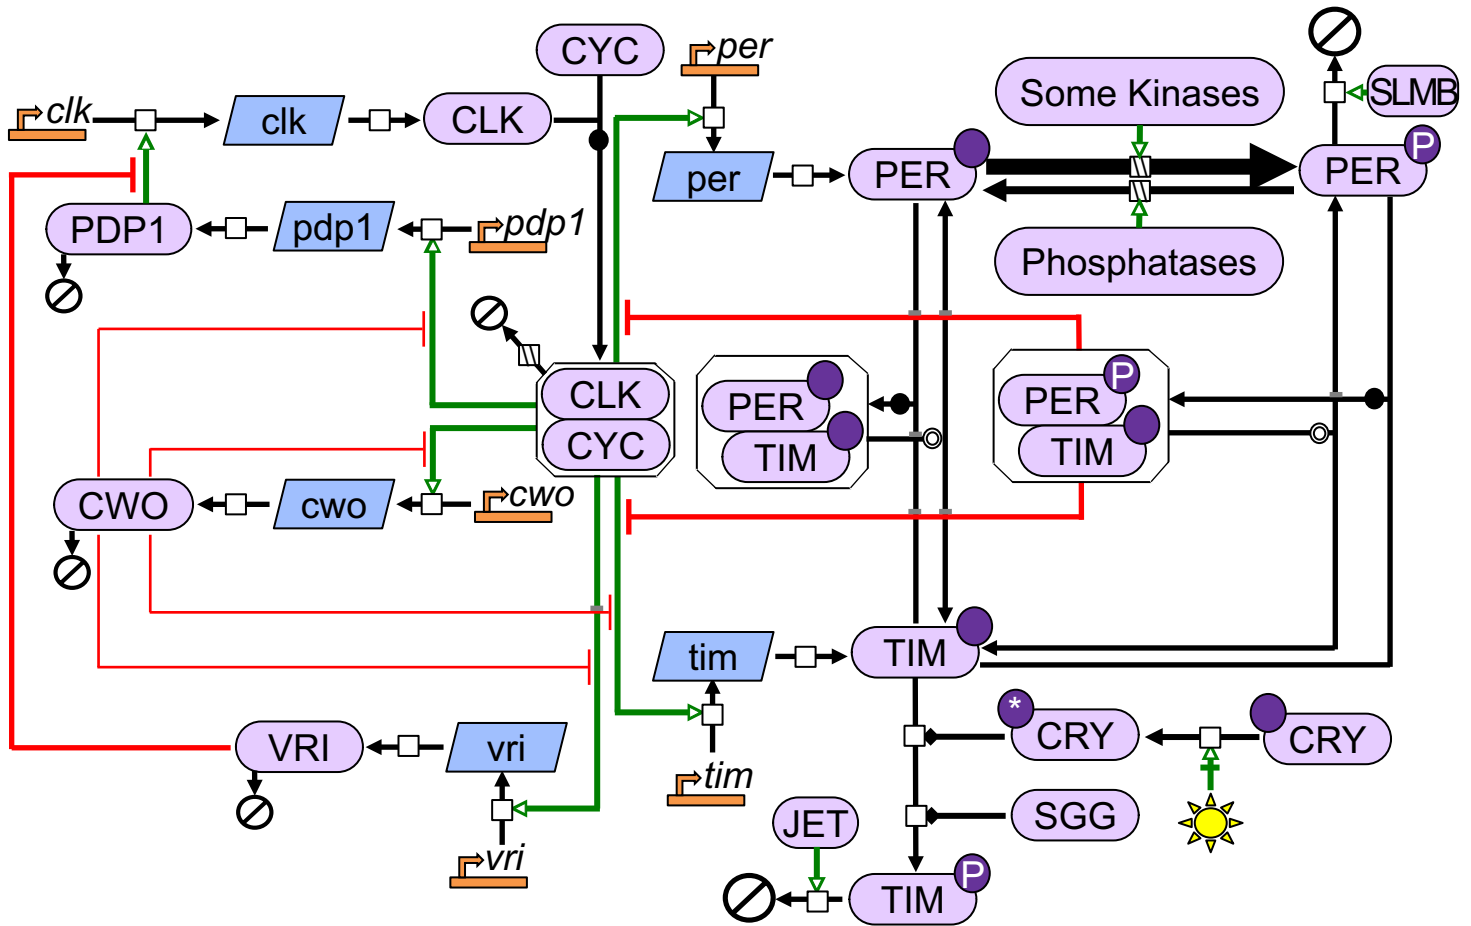

### Legend

Protein

mRNA

Stimulation

Association

Association

Unmodified Protein

Gene

Necessary Stimul.

Dissociation

Dissociation

Phosphoryl. Protein

Light

Modulation

Degradation

Degradation

Activated Protein

Complex

Strong Inhibition

Omitted Process

Omitted Process

Other Process, like Transcrip., Translat.

Weak Inhibition

Other Process, like Transcrip., Translat.

Other Process, like Transcrip., Translat.

# FlyC: FlyClockbase storing *TimeSeries Content* and *Attributes* in *SumS* and *DetS*

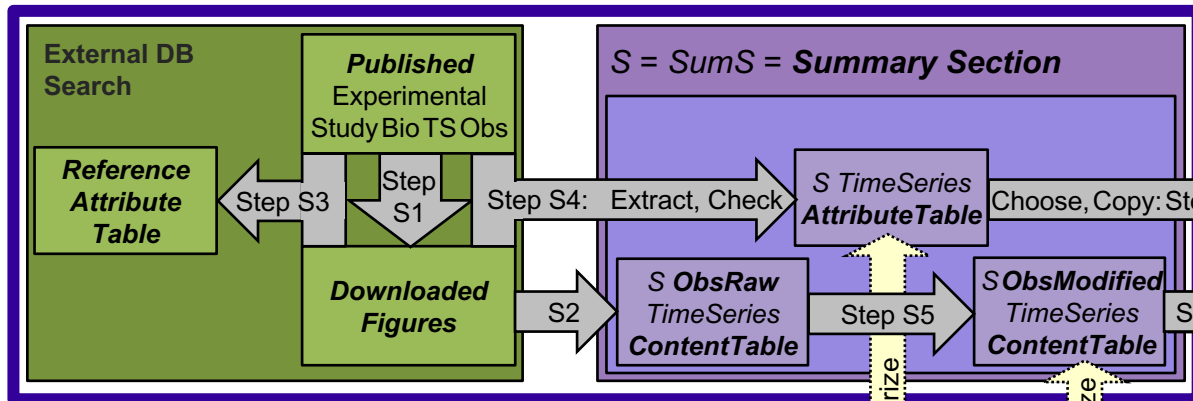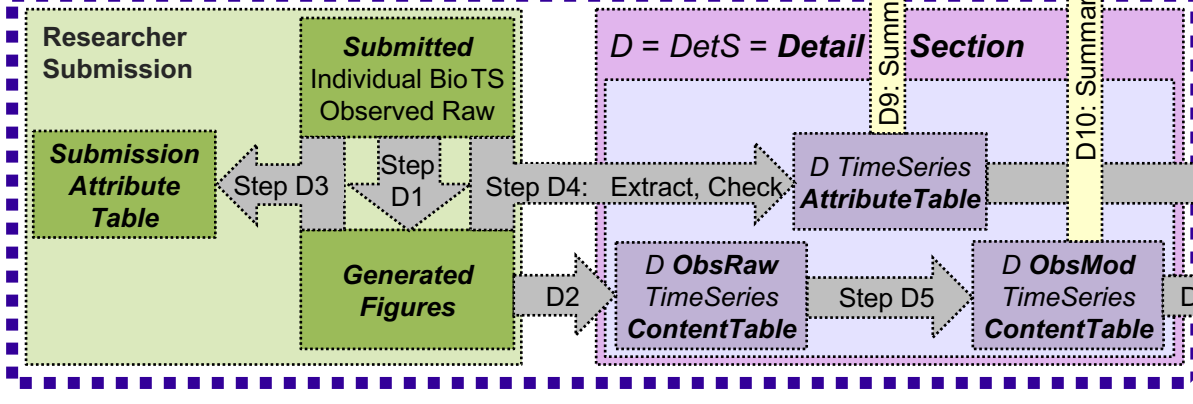

## Your Meta-Analysis

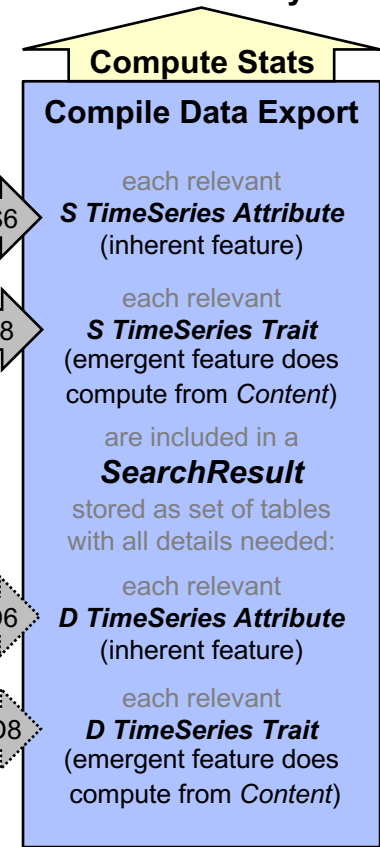

FlyClockbase Export

# Retrospective Meta-Analysis of Time Series Traits

## Peak-Valley Tables

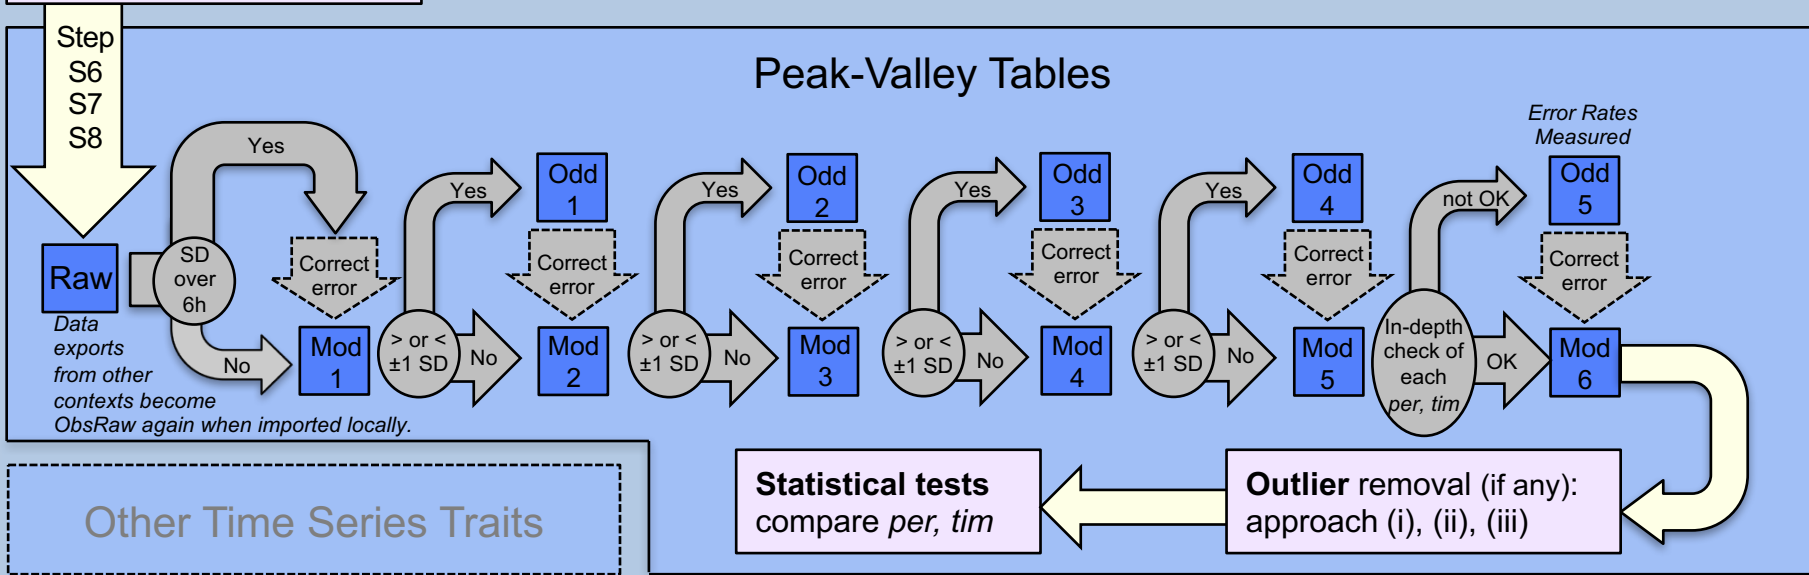

## Models based on Direct Data

Experimental studies with directly observed time series data that were

- Used in parameter estimation
- Ignored in parameter estimation

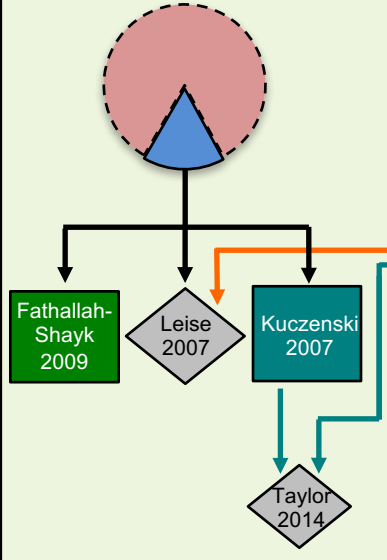

Shapes denote models with parameters based on:

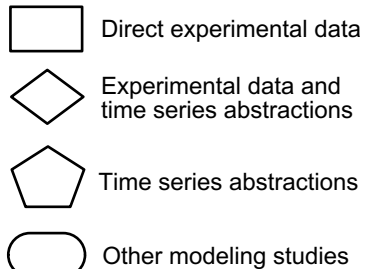

## Models based on Abstract Time Series Requirements

Time series traits abstracted from experimental observations

- Has a period of about 24 hours
- Includes feedback loops
- Is robust to minor changes
- Appears physiologically realistic
- Has appropriate light response, including phase shifts
- Oscillates with reasonable amplitude
- Simulates mutant behavior as expected
- Components show nuclear localization
- Shows expected mRNA to protein delay
- Has appropriate amount of PER protein
- Has expected time of *per* mRNA peak

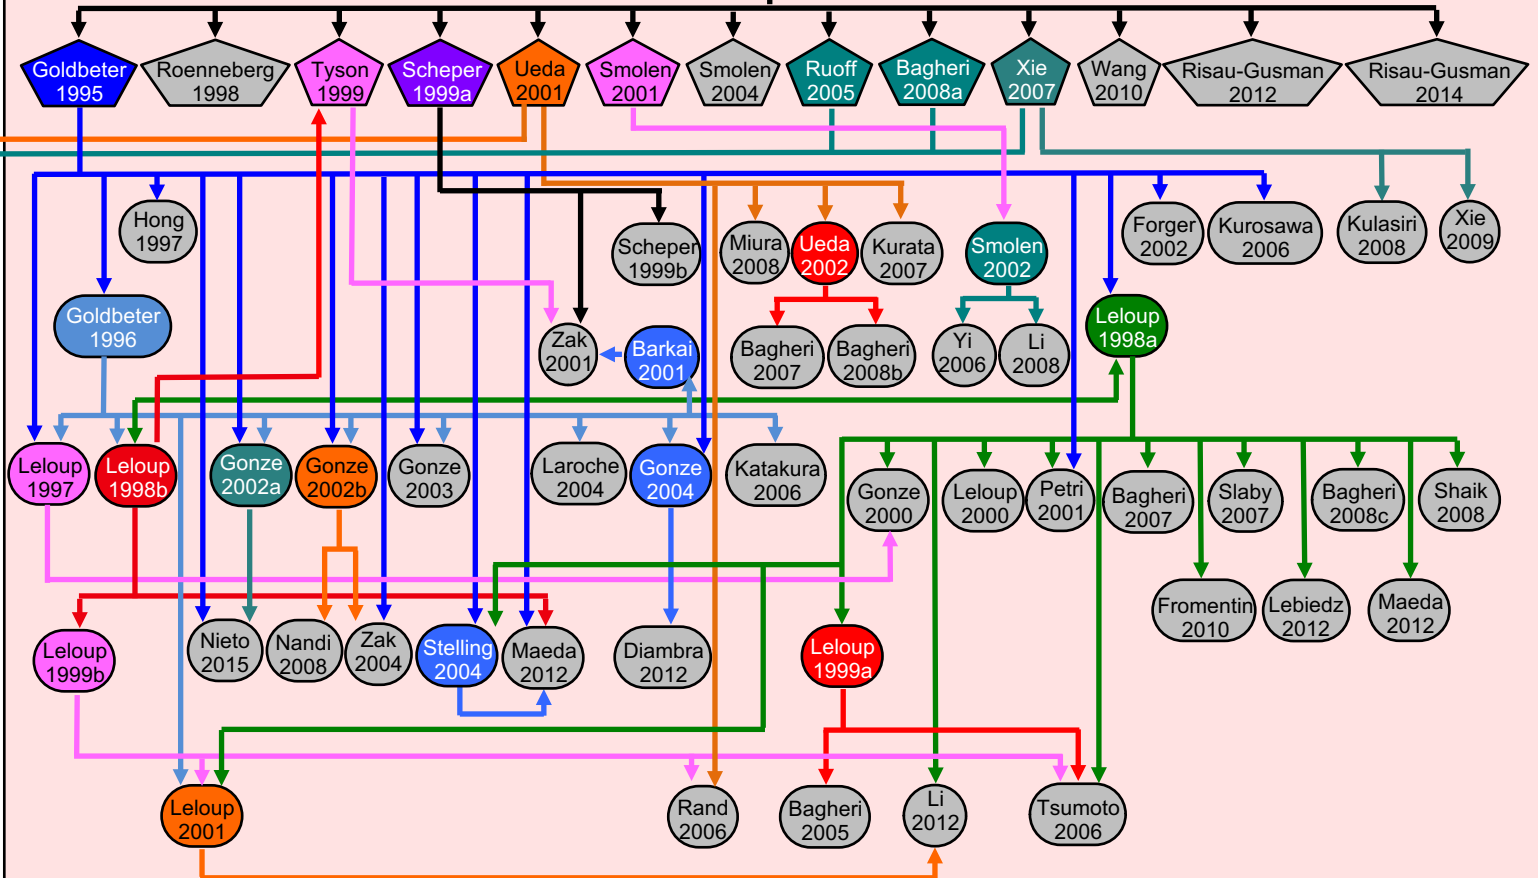



**A****Number of Studies**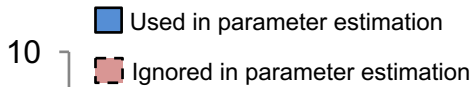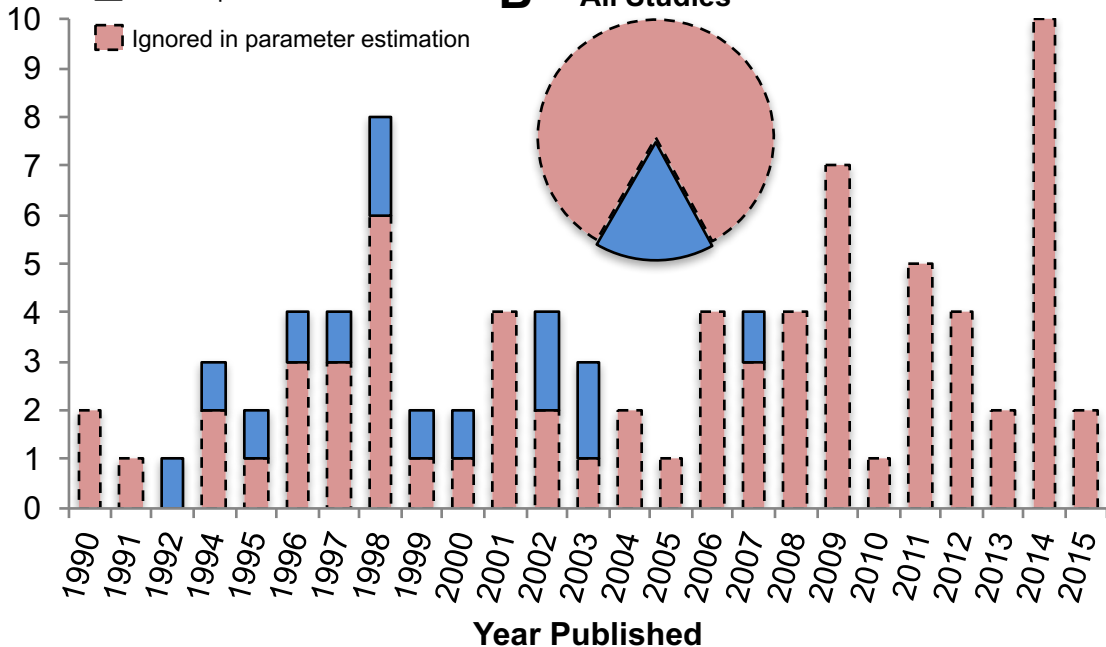**B****All Studies**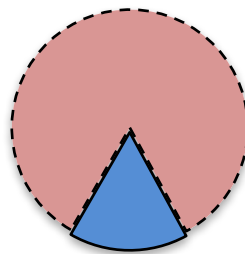

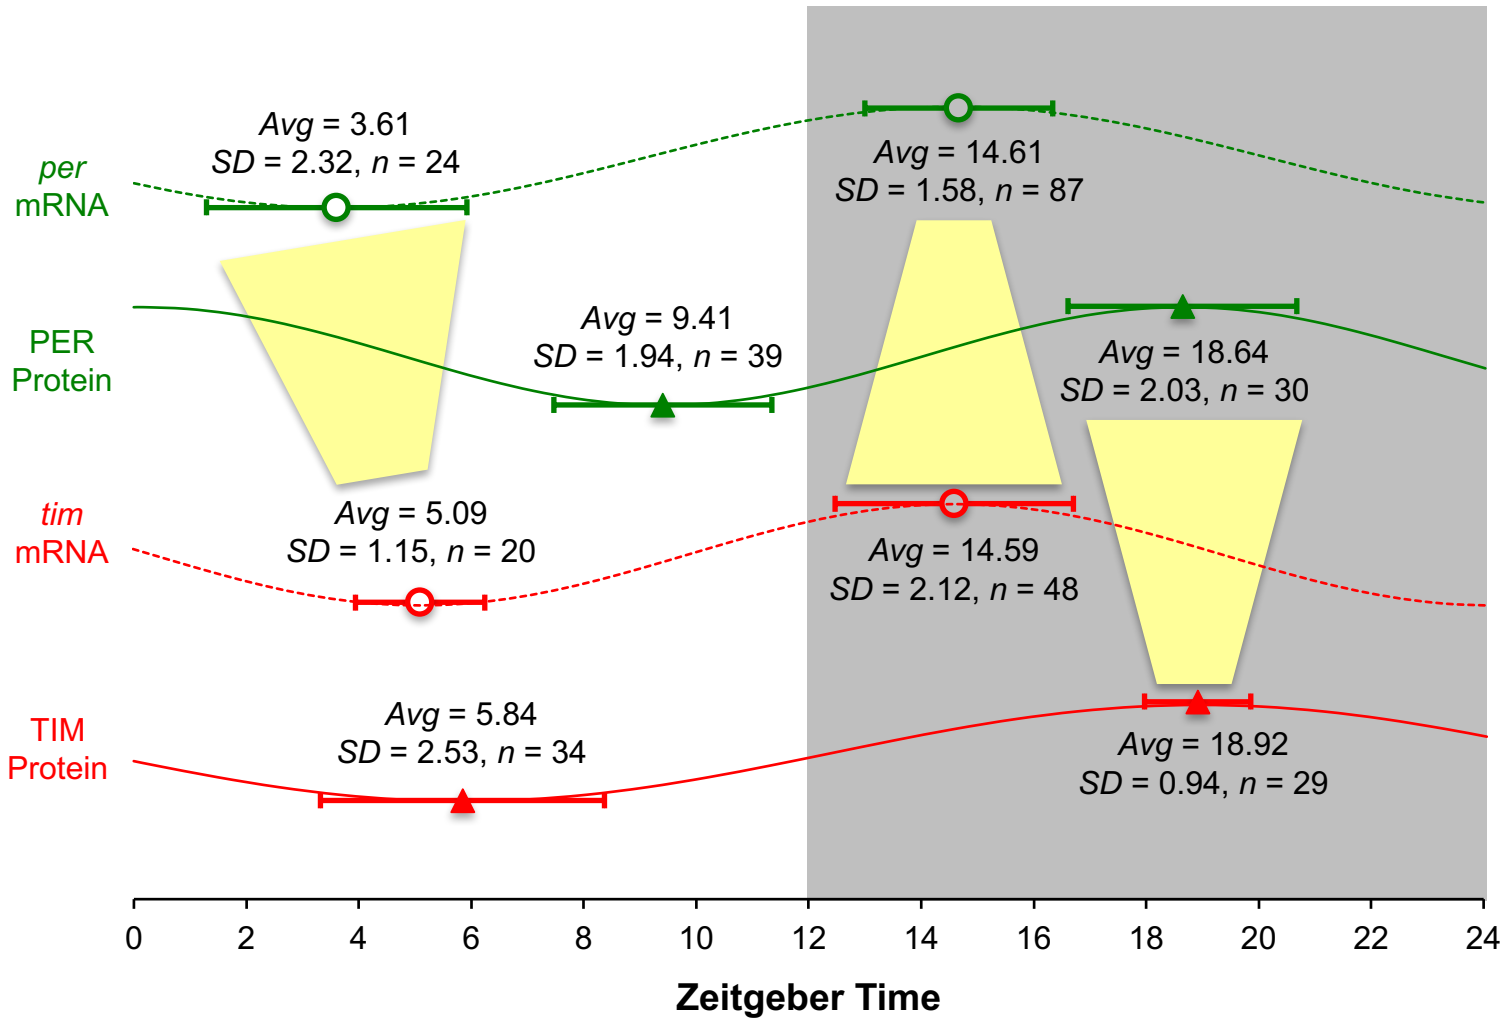

### A Peaks for Proteins PER, TIM

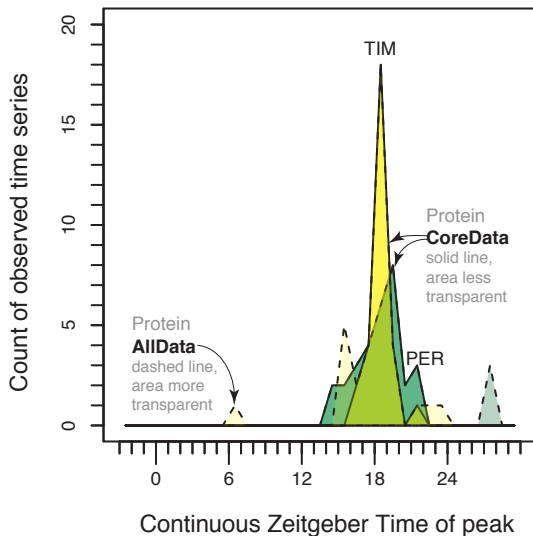

### B Valleys for Proteins PER, TIM

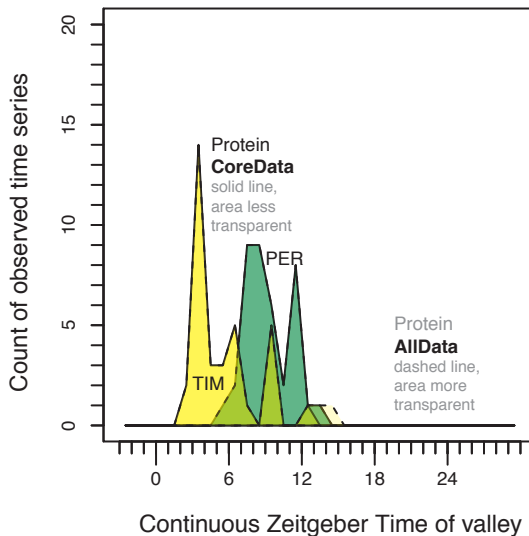

### C Peaks for mRNAs *per*, *tim*

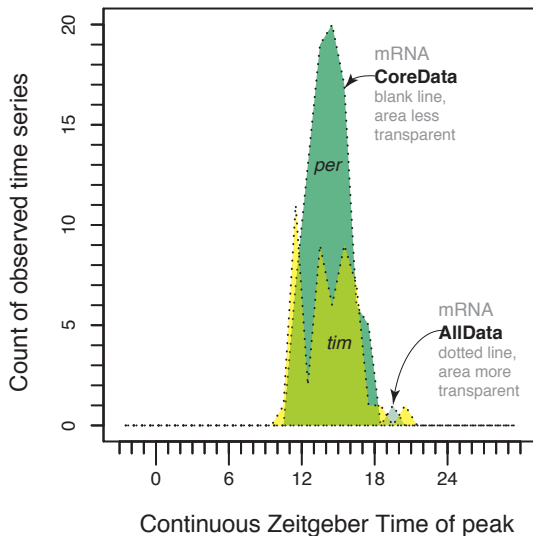

### D Valleys for mRNAs *per*, *tim*

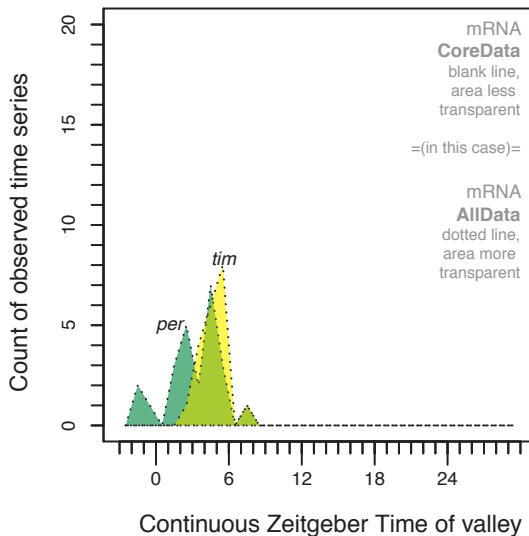

**A** All PCR vs Others (Timeseries of *per*)

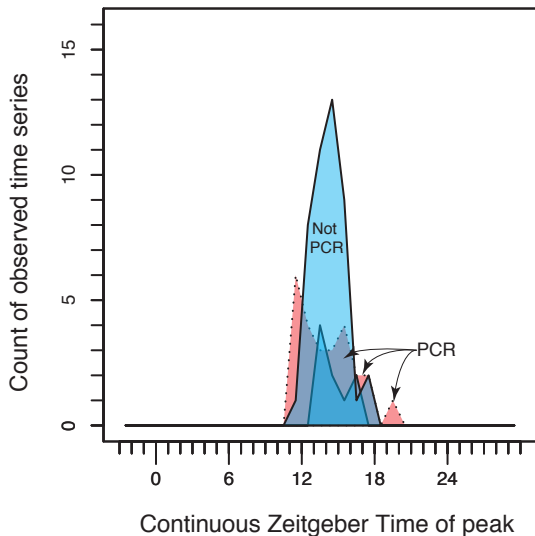

**B** Each PCR vs Other (Timeseries of *per*)

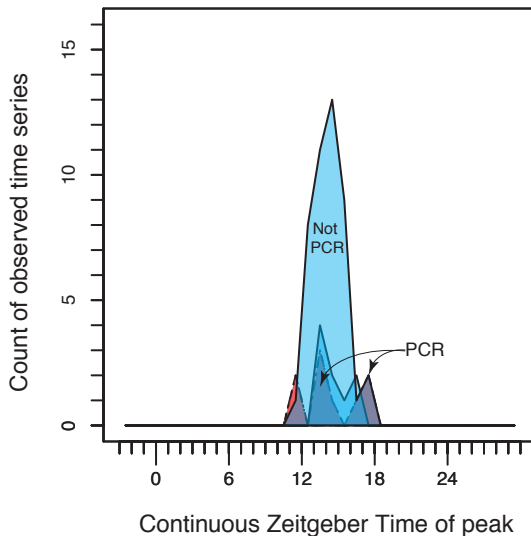

**C** Present ( $\geq 1$ ) vs Absent Method Refs

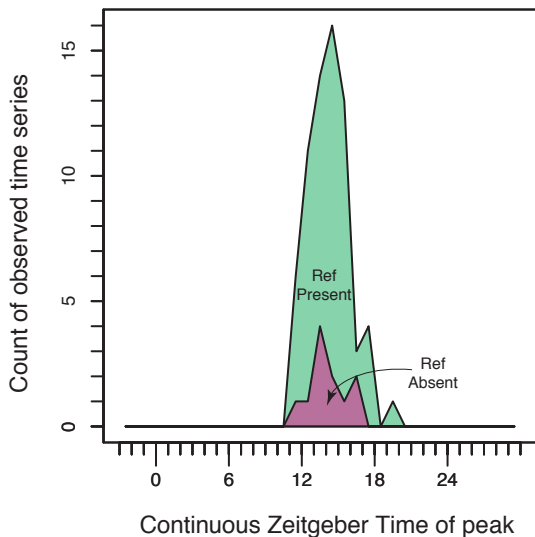

**D** Shared ( $\geq 2$ ) vs Unique Method Refs

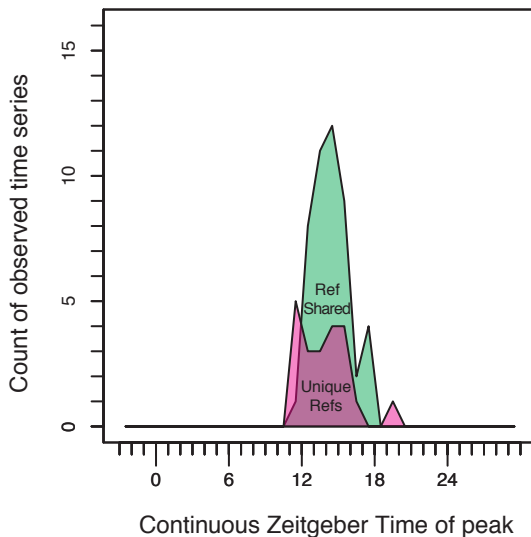



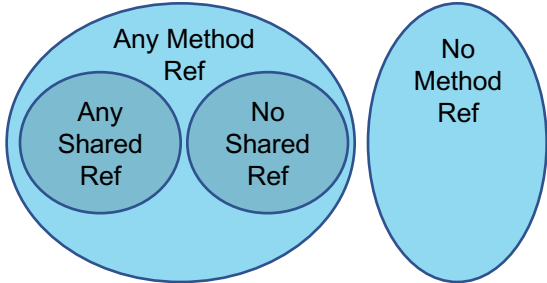

A: [-----] vs [-----]

B: [-----] vs [-----]

C: [-----] vs [-----]

## Initiators

Informal iterations to improve data model and initial dataset

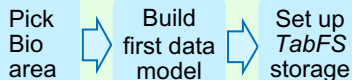

**VBIR Workflow**, producing  
**V**ersioned  
**B**iological  
**I**nformation  
**R**esources, like  
**FlyClockbase**

## Integrators

Extend data model and analyses, improve integrity and checks

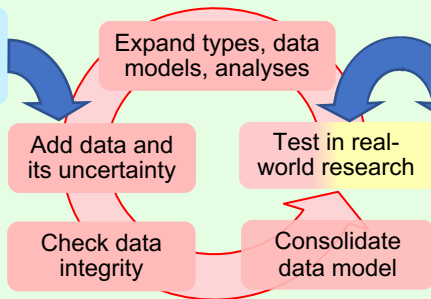

## Research-Users

Search, check, use data, apply *VBIR* results

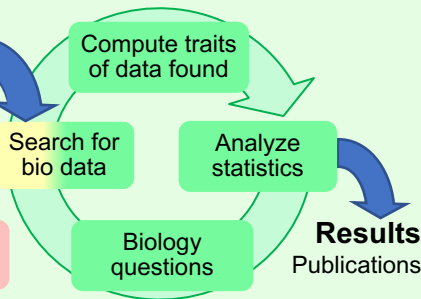

**Results**  
Publications

Other **VBIRs** maintained by biological model curators in long-term stable *TabFS* format, checked by compiler

Data problems reported

Testing service provided

Data types needed

Stable data models

New data to check

Errors well said

Logic failures, **MIS** naming

Logic models, **BEST** naming

**VBIR** Interface  
**TabFS** Interface

Library of fragments of problems, solution ideas

Develop

Draft designs, test-cases, instruction sequences

Integrate

One coherent architecture combining all solutions reliably

**VBIR Compiler Architecting Workflow** must support real-world complexity and uncertainty in biodata to enable experimental biologists to accurately quantify real-world observation uncertainty and to request helpful error reports

1 **TABLE P1. The *StablizingZone* of the *Project Organization Stabilizing Tool* (POST)**  
 2 **system is defined by the *StabilityCodes* *MM* to *TT*, presented by their *BEST* Names.**

| Brief     | Explicit                | Summarizing Name                                                                                                             |
|-----------|-------------------------|------------------------------------------------------------------------------------------------------------------------------|
| <b>MM</b> | <i>MockupModel</i>      | MockupModel_UsedFor_RapidPrototyping_InformalLearning____<br>__ExpertimentsToBeThrownAway_StabilizingDesignNotCode           |
| <b>NN</b> | <i>NewNonfunctional</i> | NewNonfunctional_UsedFor_NotYetFunctioning_DeepFoundations____<br>__ForLargerStableDesigns_ThatDoNotYetWorkForUsers          |
| <b>OO</b> | <i>OperatesOften</i>    | OperatesOften_UsedFor_Systems_PartiallyWorkingForEndUsers____<br>__while_StillMissing_ImportantFeatures_ToBeImplemented      |
| <b>PP</b> | <i>PreProbing</i>       | PreProbing_UsedFor_Preparing_PeerReviewAndPublicProbing____<br>__by_PolishingExistingFeatures_UntilSubmissionFor_Questioning |
| <b>QQ</b> | <i>QualityQuest</i>     | QualityQuest_UsedFor_Questioning_AxiomsDataScienceAccuracy____<br>__RigorClarityUsability_InMany_ExpertBeginnerReviewRounds  |
| <b>RR</b> | <i>ReviewedRelease</i>  | ReviewedRelease_UsedFor_NewReleasesRecommended_by____<br>__QualityQuestEditors_after_AnsweringAllReviewerQuestions           |
| <b>SS</b> | <i>StableSource</i>     | StableSource_UsedFor_StunningSoftware_RunningInProduction____<br>__with_LongTermSuccess_and_VeryRareRevisionRequests         |
| <b>TT</b> | <i>TrustedTested</i>    | TrustedTested_UsedFor_Marking_VeryLongTermStableDesigns_in____<br>__WellUnderstoodDomains_AllowingBackwardsCompatibleGrowth  |

3 *Both have been developed for the general-purpose programming features of Evolvix with the*  
 4 *goal of facilitating the development of long-term backwards compatibility. For more details see*  
 5 *this study of the Evolvix BEST Names concept (LOEWE et al. 2017).*  
 6

7 **TABLE P2. The *BioBinary* data type for cases in biology that are less than clear-cut.**

|            |                                                                                                                                                                                                                                                                                                                     |
|------------|---------------------------------------------------------------------------------------------------------------------------------------------------------------------------------------------------------------------------------------------------------------------------------------------------------------------|
| <b>OK</b>  | Indicates the full agreement with a specified test that has been completely executed (equivalent to Boolean “true”);                                                                                                                                                                                                |
| <b>KO</b>  | Indicates the full disagreement in all points with the specified test that has been completely executed (equivalent to Boolean “false”);                                                                                                                                                                            |
| <b>OKO</b> | Indicates any intermediate between OK and KO for cases that are well known not to be clear cut, albeit without storing any other information, such as a probability that could specify the distance from OK or KO (it is up to users to determine what they do want to store); No Boolean equivalent exist for OKO; |
| <b>MIS</b> | Indicates any mistake or problem that made it impossible to reach any of the other three conclusions, irrespective of the nature of this problem (it is up to users to decide how much about the potentially infinite complexities of such problems they wish to store; no Boolean equivalent exists for MIS).      |

22 *This new data type has been designed for efficiently reasoning about biological observations*  
 23 *with a certainty that is neither perfectly true nor false. More details elsewhere (LOEWE et al.*  
 24 *2017). It is equivalent to parliamentary voting systems that have long distinguished the*  
 25 *‘Yes’ (OK) and ‘No’ (KO) votes from ‘Abstain’ (OKO) and ‘NotPresent’ (MIS).*



**TABLE D1:** The **DISCOVARCY Documentation Style** raises awareness for causes that make source code **hard to read** and offers efficient strategies for **improving it**.

| Brief Names | <b>Coder centric view</b><br>Quicker to produce,<br>Costlier to consume<br><b>Reader Challenges</b> | <i>discovarcy</i> vs <b>DISCOVARCY</b><br><br><b>Questions for Coders &amp; Comments</b>                                                                                                                                                | <b>Reader centric view</b><br>Costlier to produce,<br>Quicker to consume<br><b>Coder Challenges</b> | Brief Names |
|-------------|-----------------------------------------------------------------------------------------------------|-----------------------------------------------------------------------------------------------------------------------------------------------------------------------------------------------------------------------------------------|-----------------------------------------------------------------------------------------------------|-------------|
|             | <b>d</b> <i>documentation derivable by deduction and decoding</i>                                   | Does documentation help coders, readers, or neither? Ideal reader support is often too costly; but brief notes on higher design decisions in broken English (lacking time or writing skills) are usually extremely helpful.             | <b>Documentation Describing Design Decisions</b>                                                    | <b>D</b>    |
|             | <b>i</b> <i>inference</i>                                                                           | If <i>source code is the documentation</i> , it should have relevant info included, not force reader inference of the coder's state of mind.                                                                                            | <b>Info Included</b>                                                                                | <b>I</b>    |
|             | <b>s</b> <i>secrecy</i>                                                                             | How much rare expertise is assumed? Are advanced coding tricks explained & marked?                                                                                                                                                      | <b>Source Simplicity</b>                                                                            | <b>S</b>    |
|             | <b>c</b> <i>complexity</i>                                                                          | Complexity is easy to write, hard to read. Clarity, simplicity is hard to write, easy to read. Hard work: removing inessential complexity, without removing essential functionality.                                                    | <b>Code Clarity</b>                                                                                 | <b>C</b>    |
|             | <b>o</b> <i>online odysseys overwhelming outsiders</i>                                              | Does code offer offline 'code-catchups' and online links to key background overviews, reducing reader overwhelm? Or are endless online odysseys mandatory for outsiders?                                                                | <b>Offline-Online Overview Offers</b>                                                               | <b>O</b>    |
|             | <b>v</b> <i>vagueness</i>                                                                           | Is the meaning of variables and functions tested & obvious from explicit or summarizing names? Using copy & paste, are names long enough to exclude random reuse of "x" etc?                                                            | <b>Vetted Variables</b>                                                                             | <b>V</b>    |
|             | <b>a</b> <i>arbitrary assumptions</i>                                                               | Different solutions build on different assumed axioms. Are they explicitly argued for?                                                                                                                                                  | <b>Argued Axioms</b>                                                                                | <b>A</b>    |
|             | <b>r</b> <i>random restrictions, reasons removed, rarely refactored</i>                             | Are restraints relevant or restrictions random and in need of refactoring? Are reasons recorded or relevant results removed?                                                                                                            | <b>Relevant Restraint Recording Rare and Regular Reasons</b>                                        | <b>R</b>    |
|             | <b>c</b> <i>cancelled comments</i>                                                                  | We like complete, clear comments over chaos & contradictions, but few can write a book. Do not cancel comments, but time-stamp collect them to help others follow. Mark older 'mixed quality' texts as 'retired' until the next update. | <b>Collected Comments</b>                                                                           | <b>C</b>    |
|             | <b>y</b> <i>years go quickly learning many poorly written codes bases</i>                           | Understanding confusing code can quickly become prohibitive. Reading clear code is learning from a teacher. What will you write? What will you see if you re-read in 10 years?                                                          | <b>Your Yield</b>                                                                                   | <b>Y</b>    |

Properties of code range from **poor** (*'discovarcy'*) to **great code** (*'DISCOVARCY'*) on a continuum. Questions can help coders to save the day for their readers by adding fast imperfect comments.

## Long-term stability in VBIRs data structures will enable new biology.

We suggest that a compiler could help curators to efficiently maintain long-term stable VBIRs in consistent formal states so that these VBIRs can be used as foundations, which are solid enough to build on them for the long term. This will eventually make it feasible to construct more advanced VBIRs on top of more basic ones. If foundational VBIRs describe causal genotypic or environmental information and more advanced VBIRs describe more consequential molecular, cellular, physiological, or other phenotypic information, then VBIRs enable the implementation of a full fitness-causality network that maps the genotypes and environments of an organism to its phenotypes in a transparent mechanistic way that connects well to the latest updates of all data that is available – if all relevant data and data structures are well curated and appropriately versioned for stability.

### Tombstone example

Database technology that is not long-term backwards compatible poses a very real long-term danger to biological research. For example, the TIGR Gene Indices were first published at <http://www.tigr.org/tdb/tgi> (QUACKENBUSH *et al.* 2000). After their introduction, the TIGR Gene Index databases quickly became a well-known tool for biological discovery (LEE AND QUACKENBUSH 2003; PERTEA *et al.* 2003; LEE *et al.* 2005). They are now no longer available online as documented on their tombstone:

<http://compbio.dfci.harvard.edu/tgi/>

In case it eventually disappears, here some vital statistics about TGI, paraphrased from its tombstone:

**Supported by NIH, DOE and NSF 1998-2010, the relevant TGI papers were cited >2000 times. When the tombstone was written the TGI website still received >7 million hits per year (assuming the actual number on the tombstone was a typo). When funding ended in 2010, the team continued to maintain the website, but the hardware and software required behind the scenes began to fail. Effective July 15, 2014 operations had to be suspended, because there were not sufficient funds to maintain it properly. The software powering TGI (DFCI Gene Indices Software Tools) and the data sets it used was ‘fossilized’ to**  
**<ftp://occams.dfci.harvard.edu/pub/bio/tgi/software/>**  
**<ftp://occams.dfci.harvard.edu/pub/bio/tgi/data/>**

It is not up to us to comment on TGI’s science or its funding history. Neither is relevant to our main point: extinction is a real risk for VBIRs and fossilization into some archive is not a real life-saver. The haphazard nature of funding for biological information repositories is well known and a significant source of concern (EMBER *et al.* 2013). Less obvious is the impact of a stable VBIRs compiler for TGI. Thus:

**Imagine** the software behind TGI would use appropriate abstractions and thus not fail. Imagine it could continue to operate reliably on different hardware, including that of users. Imagine the software would be long-term backwards compatible. Imagine it could help many biologists to contribute to curation of TGI. Imagine a whole community would annotate, improve, deprecate, or otherwise edit various aspects of TGI in order to preserve its benefits or point to improved successor tools. Imagine other biological research codes had built on long-term stable parts of TGI and could all continue to operate simply by copying TGI to a local hard drive. Then compare the simulation results from this imagination exercise to the observed tombstone above and ponder this question:

**How important are abstractions that can deliver long-term backwards compatibility?**

## TABLES OVERVIEW – MAIN TEXT

- 1  
2  
3  
4  
5  
6  
7  
8  
9  
10  
11  
12  
13  
14  
15  
16  
17  
18  
19  
20  
21  
22  
23  
24  
25  
26
- TABLE 1. **Circadian clock components** referenced in this study as introduced by their Brief, Explicit, Summarizing and Technical Name equivalents defined by using the Evolvix BEST Names concept *page 188*
- TABLE 2. **FlyClockbase and VBIR concepts and related keywords** as introduced by their Brief, Explicit, and Summarizing Name equivalents defined by using the Evolvix BEST Names concept **189**
- TABLE 3. **Data in FlyClockbase** counting independently observed *D. melanogaster* time series summaries available for each clock component in the Summary Section of FlyClockbase **195**
- TABLE 4. **Time series overview**: average (*Avg*), standard deviation (*SD*), and number of time series available (*n*) for peak and valley times of some mRNA and proteins in FlyClockbase **196**
- TABLE 5. **Human error rates** for four *Mod5 PeakValleyTables* **197**
- TABLE 6: **Timing distribution differences** tested between *per* and *tim* to compare averages and variances of peak and valley times for proteins and mRNAs after removing outliers **198**
- TABLE 7: **Impact of outlier removal** approaches on differences in variance of protein peak times (PER – TIM) **199**
- TABLE 8. **Standardization proxies**: overview of potential approximations for quantifying method detail standardization and method detail similarity for independent observations of *per* mRNA **200**

## FIGURES OVERVIEW – MAIN TEXT

- 27  
28  
29  
30  
31  
32  
33  
34  
35  
36  
37  
38  
39  
40  
41  
42  
43  
44  
45  
46  
47  
48  
49  
50  
51  
52  
53  
54  
55  
56  
57  
58  
59
- FIGURE 1. **Systems biology overview** of the circadian clock in *D. melanogaster* **201**
- FIGURE 2. **Overview of FlyClockbase** organization and data model **202**
- FIGURE 3. **Workflow for refining** the time series traits reported in peak-valley-tables **204**
- FIGURE 4. **Where do models get their realism from?** Overview of data sources reported **206**
- FIGURE 5. **Data accumulation over time**: overview of experimental studies available in FlyClockbase and their use for parameter estimation over time **207**
- FIGURE 6. **Hypotheses on timing variances in PER and TIM** as tested by FlyClockbase data. FlyClockbase extends our understanding of circadian clocks in flies by enabling observations of significant differences in variance between peaks and valleys of different clock components **208**
- FIGURE 7. **Histograms for *per* and *tim* mRNA and protein** time series traits like peaks and valleys as observed in independent experiments show how FlyClockbase helps compare variability **210**
- FIGURE 8. **Comparisons of PCR vs non-PCR methods** for measuring amounts of *per* mRNA in time series as enabled by FlyClockbase **212**
- FIGURE 9. **Referenced protocol use similarity matrix** for studies reporting *per* mRNA time series, grouping protocols by measurement approach **214**
- FIGURE 10: **Logic of datasets in statistics**: example for an interaction of statistics and formal logic where the logic for selecting datasets unnecessarily reduced the power of a statistical test **216**
- FIGURE 11: **Biological model curator and compiler architect collaboration model** for improving the integration of biological data into *VBIRs* while constructing the type system required by a *VBIR* compiler for handling the ubiquitous uncertainty of biological data more precisely **217**

## RELATED ANALYSES

60  
61  
62  
63  
64

**Hypotheses comparing timing in PER and TIM**: data and analyses in Table 4, Table S1, and Table 6, Table 7, Figure 6, Figure 7, as well as parts of the Supplemental Statistical Analysis are related.

65  
66

**Comparing PCR vs non-PCR methods for measuring time series in *per* mRNA**: data and analyses in Table 8, Figure 8, Figure 9, Figure 10, and parts of the Supplemental Statistical Analysis are related.

# FlyClockbase: Importance of Biological Model Curation for Analyzing Variability in the Circadian Clock of *Drosophila melanogaster* by Integrating Time Series from 25 Years of Research

Katherine S. Scheuer<sup>\*†</sup>, Bret Hanlon<sup>‡</sup>, Jerdon W. Dresel<sup>\*†</sup>,  
Erik D. Nolan<sup>\*†</sup>, John C. Davis<sup>‡</sup>, Laurence Loewe<sup>\*†</sup>

<sup>\*</sup>Systems Biology Theme, Wisconsin Institute for Discovery, <sup>†</sup>Laboratory of Genetics,  
<sup>‡</sup>Department of Statistics, University of Wisconsin-Madison

## Appendix: Supplemental Text

### Table of Contents

|                                                                                                                                                                                                     |            |
|-----------------------------------------------------------------------------------------------------------------------------------------------------------------------------------------------------|------------|
| <b>1. FlyClockbase design processes in more detail</b>                                                                                                                                              | <b>126</b> |
| FlyClockbase development is intertwined with Evolvix                                                                                                                                                | 126        |
| --- FlyClockbase and its challenges to programming languages                                                                                                                                        | 127        |
| --- Evolvix development follows a unique approach                                                                                                                                                   | 127        |
| --- Long-term goals of Evolvix                                                                                                                                                                      | 128        |
| --- How FlyClockbase helped Evolvix                                                                                                                                                                 | 128        |
| --- How Evolvix helped FlyClockbase                                                                                                                                                                 | 129        |
| --- Stabilizing Versioning                                                                                                                                                                          |            |
| --- Examples: QQv1, RRv1                                                                                                                                                                            |            |
| --- Why stabilizing versioning?                                                                                                                                                                     | 129        |
| --- Table P1                                                                                                                                                                                        | 130        |
| --- The role of TabFS in the stability of FlyClockbase                                                                                                                                              |            |
| --- How does stabilizing versioning benefit FlyClockbase?                                                                                                                                           |            |
| --- Types in FlyClockbase                                                                                                                                                                           |            |
| --- Test case for Evolvix                                                                                                                                                                           |            |
| --- Why not a conventional database?                                                                                                                                                                | 131        |
| --- Logic challenges posed by missing data                                                                                                                                                          | 132        |
| --- Table P2                                                                                                                                                                                        | 133        |
| --- Permissions, backups, and the reliability of data storage                                                                                                                                       | 134        |
| --- Challenges in logic                                                                                                                                                                             |            |
| --- Trade-offs: paper vs databases vs filesystems                                                                                                                                                   |            |
| --- Long-term stability in VBIRs data structures will enable new biology                                                                                                                            | 136        |
| --- Tombstone example                                                                                                                                                                               | 137        |
| <b>2. Human error analyses: approaches, challenges, efficiencies</b>                                                                                                                                | <b>138</b> |
| Finding capable curators                                                                                                                                                                            | 138        |
| --- Errors are inevitable                                                                                                                                                                           | 138        |
| --- Errors are hard to detect for humans                                                                                                                                                            | 139        |
| --- Human error analysis and prevention methods are difficult to develop                                                                                                                            | 139        |
| --- Error analysis could be amortized across resources by compilers                                                                                                                                 | 142        |
| --- Efficiencies of scale                                                                                                                                                                           | 142        |
| --- Tool development and funding strategy development are connected tasks                                                                                                                           | 143        |
| <b>3. DISCOVARCHY Documentation Style Questions for Coders</b>                                                                                                                                      | <b>144</b> |
| Source code as documentation                                                                                                                                                                        | 144        |
| --- Source code as electronic lab note book for <i>in silico</i> research                                                                                                                           | 144        |
| --- Trade-offs in code writing                                                                                                                                                                      | 144        |
| --- DISCOVARCHY in brief                                                                                                                                                                            | 145        |
| --- Table D1                                                                                                                                                                                        | 146        |
| <b>4. Example of an error a compiler could have caught by type checking: Effect of linearizing clock times on distributions of Peaks and Valleys</b>                                                | <b>147</b> |
| Recall Example Context                                                                                                                                                                              | 147        |
| --- Problem in principle                                                                                                                                                                            | 147        |
| --- Problem in practice                                                                                                                                                                             | 148        |
| --- Uninformative DZTs                                                                                                                                                                              | 148        |
| --- Detecting excessive noise                                                                                                                                                                       | 148        |
| --- Table S1                                                                                                                                                                                        | 149        |
| --- Solution by linearization                                                                                                                                                                       | 150        |
| --- How a simple VBIR compiler can help                                                                                                                                                             | 150        |
| --- How a more advanced VBIR compiler can help                                                                                                                                                      | 150        |
| --- Other examples                                                                                                                                                                                  | 150        |
| --- Compilers that directly assist in biological research                                                                                                                                           | 151        |
| --- Expected cost reductions                                                                                                                                                                        | 151        |
| <b>5. Literature cited in supplemental material</b>                                                                                                                                                 | <b>152</b> |
| <b>TABLE P1</b> The <i>StablizingZone</i> of the <i>Project Organization Stabilizing Tool</i> (POST) system is defined by the <i>StabilityCodes MM</i> to <i>TT</i> , presented by their BEST Names | <b>130</b> |
| <b>TABLE P2</b> The <i>BioBinary</i> data type for cases in biology that are less than clear-cut                                                                                                    | <b>133</b> |
| <b>TABLE D1</b> The DISCOVARCHY questions on documentation style help highlight source code that is hard to read and might offer ideas for improving it efficiently                                 | <b>146</b> |
| <b>TABLE S1</b> The impact of linearizing circadian time on summary statistics like the <i>Peak</i> (A) and <i>Valley</i> (B) traits of time series                                                 | <b>149</b> |

# FlyClockbase: Importance of Biological Model Curation for Analyzing Variability in the Circadian Clock of *D. melanogaster* by Integrating Time Series from 25 Years of Research

## Table of Contents

|    |                                                                                                                |    |
|----|----------------------------------------------------------------------------------------------------------------|----|
| 1  |                                                                                                                | 1  |
| 2  |                                                                                                                |    |
| 3  |                                                                                                                |    |
| 4  |                                                                                                                |    |
| 5  |                                                                                                                |    |
| 6  | <b>FRONT-MATTER: Abstracts &amp; Tables of Content</b>                                                         | 1  |
| 7  |                                                                                                                |    |
| 8  | <b>INTRODUCTION</b>                                                                                            | 1  |
| 9  | Challenges 1 --- Circadian clocks 2 --- Model organisms 3 --- Math models 3 --- Estimating                     |    |
| 10 | unknown rates from observed time series 4 --- Biological example --- Models and reality                        |    |
| 11 | Reproducibility of research 5 --- Firm foundations --- Problems with label reproducibility ---                 |    |
| 12 | Statistical reproducibility --- Statistical error iceberg --- Reproducibility in genetics 9 ---                |    |
| 13 | Versioned Biological Information Resources (VBIRs) 9 --- Importance of versioned data integrators              |    |
| 14 | Flexibility of VBIRs --- Database integration --- Cochrane review --- Genome projects as a model               |    |
| 15 | for VBIRs development on a broader scale 12 --- Genome projects have revolutionized biology ---                |    |
| 16 | Importance of biological model curation 13 --- How a compiler could help in biological model                   |    |
| 17 | curation 13 --- Enforce best practices --- Efficiencies of scale --- Opportunity 15 --- Purpose of             |    |
| 18 | this study 15 --- Formal organization of Versioned Biological Information Resources (VBIRs) ---                |    |
| 19 | Data integrated by curation --- Hypothesis tested: biological variability --- Hypothesis tested:               |    |
| 20 | observation method --- Human error analysis --- Compiler logic design --- Importance of efficient              |    |
| 21 | biological model curation --- Overview of Sections                                                             |    |
| 22 |                                                                                                                |    |
| 23 | <b>MODELS</b>                                                                                                  | 20 |
| 24 | <b>Biological model of fly circadian clocks</b> 20 --- Main loop 20 --- Other loops 21                         |    |
| 25 | <b>In silico models integrating fly clock observations</b> 21 --- Biological results overview 21 --- Role      |    |
| 26 | of stochasticity 22 --- Shared problems 22 --- Parameter estimation in complex models 23 ---                   |    |
| 27 | Using abstract time series traits 24 --- Using complete observed time series 25 --- Using both                 |    |
| 28 | complete observed time series and abstract traits 27 --- Complete experimentally observed time                 |    |
| 29 | series --- Working with abstract time series traits --- Distances --- Both sides offer advantages              |    |
| 30 | Studies integrating time series data 29                                                                        |    |
| 31 | <b>FlyClockbase data model overview</b> 30 --- Overview 30 --- SumS, DetS --- Logic in biology 31 ---          |    |
| 32 | Other design decisions 32 --- Simple file system storage 32 --- Flexibility 33 --- Data types for              |    |
| 33 | organizing content 34 --- Content, Attributes, Traits --- Identification of <i>TimeSeries</i> 36 --- IDL, IDF, |    |
| 34 | IDM, Ref.Fig.TS -- <i>Raw, Mod, and Odd Observations</i> 37 --- Data types of time measurements 38 ---         |    |
| 35 | <i>ZT, DZT, CZT</i> -- Data types of amounts 39 --- Current definition of scope 39 --- Collection of data 40   |    |
| 36 |                                                                                                                |    |
| 37 | <b>MATERIALS AND METHODS</b>                                                                                   | 41 |
| 38 | <b>Literature search</b> 41 --- Initial eligibility assessment 41 --- Biological eligibility assessment 42     |    |
| 39 | <b>TimeSeries data extraction</b> 43 --- Accuracy estimates of digitized <i>TimeSeries</i> data 43 ---         |    |
| 40 | Extracting <i>TimeSeries Attributes</i> 44                                                                     |    |
| 41 | <b>TimeSeries Traits analysis of Peaks and Valleys refined by ObsOdd checks</b> 46 ---                         |    |
| 42 | Measuring a limit for maximal peak time variance 46 --- Factors contributing to                                |    |
| 43 | increased trait variance 47 --- Linearizing Time Series Data 48                                                |    |
| 44 | <b>Statistical Analyses</b> 49 --- Automated analysis with R script 50 --- Outlier analysis 50 ---             |    |
| 45 | Testing differences in variance 51 --- Testing differences in mean 51 ---                                      |    |
| 46 | Supplemental Statistical Analysis 51                                                                           |    |
| 47 |                                                                                                                |    |
| 48 | <b>RESULTS</b>                                                                                                 | 52 |
| 49 | <b>Experimental observations used in modeling</b> 52 --- see Figure 4 and 5                                    |    |
| 50 | <b>FlyClockbase is a new resource enabling studies of circadian clock TimeSeries</b> 53 --- Hypothesis         |    |
| 51 | testing --- Error analysis 54 --- Overview of <i>TimeSeries Traits</i> 54 --- Why estimate errors? 54 ---      |    |
| 52 | Quality control in FlyClockbase and <i>TraitTables</i> 55 --- Basic Null-Hypothesis $H_{basic}$ 56             |    |
| 53 | <b>Hypothesis on Peak time variances: PER exceeds TIM</b> 57 --- Data quality 58 ---                           |    |
| 54 | Main analysis with outlier robustness --- Alternative handling of outliers 60 ---                              |    |
| 55 | Other peak comparisons 60 --- Valley comparisons 61                                                            |    |
| 56 | <b>Comparing methods for measuring TimeSeries of per mRNA</b> 61 ---                                           |    |
| 57 | Measurement methods 61 --- Comparing means ... and variances --- Method references 62 ---                      |    |
| 58 | Presence or absence of method references --- Presence or absence of shared method references ---               |    |
| 59 | Reduction of statistical power by application of inappropriate logic? 63 --- Result ---                        |    |
| 60 | Comparing Methods by Study to Reduce Multiple Comparisons 65                                                   |    |

|    |                                                                                                                                       |                    |
|----|---------------------------------------------------------------------------------------------------------------------------------------|--------------------|
| 1  | <b>DISCUSSION</b> .....                                                                                                               | <b>67</b>          |
| 2  | Why learn lessons on data? <b>67</b> --- Why do we need many <i>VBIRs</i> ? <b>67</b>                                                 |                    |
| 3  | <b>FlyClockbase is consistent with current hypotheses</b> <b>68</b> --- CLK and other proteins <b>68</b> ---                          |                    |
| 4  | PER and TIM dynamics <b>69</b>                                                                                                        |                    |
| 5  | <b>FlyClockbase facilitates hypothesis-driven research</b> <b>69</b> --- Starting with a blank slate <b>70</b> ---                    |                    |
| 6  | Using <i>Attributes</i> to compare timing variability <b>70</b> --- Existing hypotheses on timing <b>70</b> ---                       |                    |
| 7  | The strength of FlyClockbase <b>70</b>                                                                                                |                    |
| 8  | <b>Peak timing hypotheses and more: PER variance exceeds TIM variance</b> <b>71</b> ---                                               |                    |
| 9  | Comparing averages <b>71</b> --- Explaining averages <b>72</b> --- Comparing variances <b>72</b> --- Outliers <b>73</b> ---           |                    |
| 10 | Genetic background differences --- Environmental or developmental differences --- Environmental or                                    |                    |
| 11 | developmental differences for measured files --- Evolution in different lab environments --- Human                                    |                    |
| 12 | errors --- Conclusion on outliers --- Hypotheses on causes for differences in variance <b>76</b> ---                                  |                    |
| 13 | Phosphorylation network size --- Mechanistic phosphorylation network stochasticity hypotheses ---                                     |                    |
| 14 | Previous simulations --- Future simulations --- Expanding Hypotheses on CURLED <b>77</b>                                              |                    |
| 15 | <b>Hypothesis: peaks from PCR methods are more variable</b> <b>78</b> --- Methods background <b>78</b> ---                            |                    |
| 16 | Sensitivity vs Reproducibility <b>78</b> --- Poor reproducibility may be masked by biological variability <b>79</b> ---               |                    |
| 17 | Experimental causes for PCR variability <b>79</b> --- PCR and Northern Blot accuracy <b>80</b> ---                                    |                    |
| 18 | Differences between qPCR and RT-PCT? <b>80</b> --- Analysis of measurement protocol references                                        |                    |
| 19 | using FlyClockbase <b>80</b> --- Shared references are less frequent for PCR studies <b>81</b>                                        |                    |
| 20 | <b>Explanation: large fluctuations from PCR stochasticity</b> <b>81</b> --- Exponential growth causes                                 |                    |
| 21 | for PCR variability <b>81</b> --- Great sensitivity and poor reproducibility are linked <b>82</b> --- Observations                    |                    |
| 22 | of the theory <b>83</b> --- How this applies to amount peak timing observed by PCR --- Summary <b>83</b>                              |                    |
| 23 | <b>Model curation for integrating molecular systems biology data</b> <b>84</b> --- Related concrete                                   |                    |
| 24 | solutions <b>84</b> --- Related abstract frameworks <b>84</b> --- Baseline: Conceptual unity despite diversity of                     |                    |
| 25 | methods <b>85</b> --- Contradictory biological information <b>86</b> --- Debugging time limits --- Communicating                      |                    |
| 26 | errors --- Types of problems with data --- Using imperfect data Imperfection spelled out --- Problem                                  |                    |
| 27 | type repository --- The role of logic <b>88</b> --- Simple question: How many molecules of a given type exist                         |                    |
| 28 | at a given time in a given cell? <b>88</b> --- Curation efforts for circadian clock research <b>90</b> --- Perspectives               |                    |
| 29 | on biological model curation <b>93</b> --- Will tool development overwhelm biological goals? --- Will biology                         |                    |
| 30 | try to advance too fast for its own good? --- Balance                                                                                 |                    |
| 31 | <b>Towards a Compiler for Advancing FlyClockbase and Biology</b> <b>96</b> --- History <b>96</b> --- Unusual                          |                    |
| 32 | approaches to constructing an unusual compiler <b>96</b> --- Cost of <i>not</i> constructing a <i>VBIR</i> compiler <b>97</b>         |                    |
| 33 | Counter intuitive challenges and other work <b>98</b> --- More biological precision requires handling more                            |                    |
| 34 | imprecision more precisely --- Logic in gene regulatory networks --- Formal systems of logic are                                      |                    |
| 35 | usually not logical enough for biology <b>100</b> --- Data quality, plot quality, and task completion. --- Cost                       |                    |
| 36 | --- Implications for Logic --- How to detect logic errors in FlyClockbase <b>101</b> --- Error handling in the                        |                    |
| 37 | face of uncertainty <b>103</b> --- Opportunities --- Challenges --- Trans-disciplinary solutions --- Error                            |                    |
| 38 | analyses could be amortized across <i>VBIRs</i> by compilers <b>104</b> --- Efficiency --- Examples                                   |                    |
| 39 | <b>PopGen predictions on FlyClockbase survival and success</b> <b>105</b> --- The stage <b>106</b> --- Aging and                      |                    |
| 40 | death <b>106</b> --- Growth and reproduction <b>106</b> --- Speciation and merging <b>107</b> --- Extinction <b>107</b>               |                    |
| 41 | --- Horizontal gene transfer <b>107</b> --- Practically --- Potential predictions <b>109</b> --- Loss is likely <b>109</b>            |                    |
| 42 | --- Loss is fast and 'child mortality' matters <b>109</b> --- Fossilization is usually deadly <b>110</b>                              |                    |
| 43 | <b>Next practical steps for FlyClockbase</b> <b>110</b> --- Reorganize files, define versioning policy and simplify                   |                    |
| 44 | folder structure <b>110</b> --- Use a public distributed version control system to be efficient <b>111</b> ---                        |                    |
| 45 | Develop TabFS <b>112</b> --- Tables in their simplest form --- TabFS specification --- Define a type system                           |                    |
| 46 | for TabFS <b>114</b> --- Automate TabFS checks to help expand the biology of FlyClockbase <b>115</b>                                  |                    |
| 47 | <b>Conclusion</b> <b>116</b> --- FlyClockbase as a <i>VBIR</i> <b>116</b> --- Designing a compiler for biological data <b>116</b> --- |                    |
| 48 | Trans-disciplinary aspects <b>117</b> --- View on gene expression variability <b>118</b> --- View on simplifying                      |                    |
| 49 | <i>VBIRs</i> work <b>118</b> --- View on Evolutionary System Biology <b>119</b> --- Biological model curation <b>119</b> ---          |                    |
| 50 | A growing avenue to biological research --- What it takes to get onto the shoulders of giants <b>121</b>                              |                    |
| 51 |                                                                                                                                       |                    |
| 52 | <b>ACKNOWLEDGEMENTS &amp; AUTHOR CONTRIBUTIONS</b> .....                                                                              | <b>122</b>         |
| 53 | <b>APPENDIX: SUPPLEMENTAL TEXT and TABLES</b> .....                                                                                   | <b>125</b>         |
| 54 | <b>LITERATURE CITED in Appendix and Main Text</b> .....                                                                               | <b>152 and 157</b> |
| 55 | <b>TABLES and FIGURES Overview</b> .....                                                                                              | <b>187</b>         |
| 56 | <b>TABLES</b> <b>1 to 8</b> .....                                                                                                     | <b>188</b>         |
| 57 | <b>FIGURES</b> <b>1 to 11</b> .....                                                                                                   | <b>200</b>         |

## Conclusion

This study contributes important foundations to our overall goal of improving the reproducibility, reliability, and relevance of biological data analyses, starting with observations of the *D. melanogaster* circadian clock. To this end, we aim to automate as many repetitive tasks as possible by providing computational tools that can be efficiently used by experimental biologists. Ideally, this will inspire increased adoption of computational tools and empower biologists to expand their thinking capabilities to investigate new questions. This will be required to meet current grand challenges from personalizing medicine to predicting mechanistic fitness landscapes in evolutionary systems biology (LOEWE 2016). Such types of problems often require the analysis of innumerable smaller computational models, which is impossible without highly automated information processing to cut through the associated cognitive complexity.

**FlyClockbase as a VBIR.** The resource we compiled might be able to serve as an example for a versioned biological information resource that is organized in a radically simple way by being completely accessible as tables of text. It also exemplifies what a ‘small model’ in a grand challenge context might look if comparable in size to our clock model (see Figure 1) with similar amounts of time series or other experimental data. We expect such data to be as scattered as it was for FlyClockbase. Experience with time series in FlyClockbase suggests that many other datasets are probably also likely to contain a mix of broad general trends and numerous statements that remain incomplete, imprecise and contradictory. To successfully handle this avalanche of challenges in biology, we have been analyzing observations and models of the fly circadian clock. Simultaneously we have been collecting instances, where automation by a compiler could greatly increase the efficiency of integrating biological knowledge-fragments and maintaining the integrity of a VBIR in face of common uncertainties in biological data.

**Designing a compiler for biological data.** The design of such a compiler is greatly improved in our experience, when developed simultaneously and in close collaboration with biological model curators who regularly expose compiler designers to the many imperfections of biological data. The seemingly perfect abstractions of compiler type systems need to meet the messy observations made in biology, and conversely, biological observations need to become more organized by learning from the abstraction techniques developed in computer science. Such trans-disciplinary communication is possible in our experience (see Figure 11 for an overview of the process). Consequently, our work in this study drills deep in distant areas from different disciplines, both basic and applied. The volume of relevant material forced us repeatedly to refer to Supplemental Material, the Evolvix BEST Names study (LOEWE

1 2016), or simply limit scope (usually indicated). A brief overview of the relevant research  
2 areas might illustrate these challenges for compiler construction.

3 **Trans-disciplinary aspects.** The seemingly disparate areas of enquiry in this  
4 study are deeply connected by our desire to improve the reproducibility and reliability of  
5 models in computational molecular systems biology. We study:

- 6 (i) *the molecular genetics* of gene regulatory networks in *Drosophila* circadian  
7 clocks (reviewed in Figure 1),
- 8 (ii) *the statistics of robust differences* in variance among observed time series traits  
9 (Figure 5),
- 10 (iii) *the applied mathematics of simulating* time series from Continuous Time Markov  
11 Chain models (Figure 4 lists models, leaving simulation for later),
- 12 (iv) *the behavior of modelers*, namely how they prefer to parameterize their models  
13 (Figure 4),
- 14 (v) *the human-computer interactions* that help to reduce data smog and information  
15 overload by improving visualization and organization in plots, in models, in and  
16 data structures (Figure 1,2,6,7,9),
- 17 (vi) *the statistics of detecting human errors* in spreadsheets, data analysis, logic, and  
18 source code (Figure 3, Table 5, Discussion, Supplementary Material),
- 19 (vii) *the data science of reproducibility* for improving reliability, semantic, statistic, and  
20 other reproducibility of publishable research results from the early investigative  
21 stages (see Supplemental Material, Table P1 and the ‘DISCOVARC’  
22 Documentation Style), and
- 23 (viii) *the computer science of compilers and programming languages* as needed for  
24 supporting the development of other biological information resources like  
25 FlyClockbase. This requires addressing a broad range of topics, including  
26 mathematical logic, type theory, arithmetic, syntax, semantics, memory  
27 organization, naming, and others. Figure 11 provides an overview of the types of  
28 interactions we have observed between biological model curators and a compiler  
29 architect while developing FlyClockbase.

30 Thus, we touched the tips of many icebergs and often needed to limit our scope. Much  
31 of this tension was caused by our desire to build a compiler that understands the  
32 imprecisions and complexities of biology and supports the efficient construction of high-  
33 quality *VBIRs*. We have pursued this goal by constructing such a *VBIR* and performing  
34 manually all tasks that we would like to delegate; this gave us the opportunity to reflect  
35 on the nature of the tasks and the quality of the outcome. This reduces the speed of  
36 both: compiler construction and *VBIR* construction, but simultaneously greatly increases  
37 quality. As argued by our analogy to aspects of population genetics theory, such  
38 increases in quality can be pivotal for the survival of a *VBIR* like FlyClockbase, which  
39 can easily be killed by small increases of inessential complexity. In this study, we  
40 provided a broad overview of this tandem work. We have removed from this paper all



1 aspects that can also stand on their own. For example, readers of this journal might be  
2 less interested in a formally complete description of the data structures that comprise  
3 Evolvix and the nuances of data models that contribute towards long-term stability. We  
4 endeavored to keep in the main text only those computational aspects that are most  
5 important for navigating the broader concepts used in FlyClockbase or that convey a  
6 general overview of our approach to reducing the cost of maintaining digital resources  
7 with the help of a compiler designed for this purpose. There is no reason why such a  
8 compiler could not be used by individual researchers collecting their own data, some of  
9 which they might want to share later. Therefore, our work presented here could also be  
10 seen from the following points of view.

11  
12 **View on gene expression variability.** The most direct purpose of our study is to  
13 use FlyClockbase to generate and analyze hypotheses about circadian clocks in *D.*  
14 *melanogaster*. We analyzed patterns of circadian variability across diverse independent  
15 studies of fruit flies, accumulating the largest number of time series for this purpose to  
16 date (to our knowledge). We have used the statistical power of FlyClockbase to detect  
17 consistent differences in the variance of peak times for the important clock proteins PER  
18 and TIM. This led us to hypothesize that these differences have mechanistic causes that  
19 are worth investigating with the methods of computational molecular systems biology  
20 (out of scope here). Our detailed analysis of variances in the peaks of PER and TIM  
21 and the potential causes for outliers (see above) suggests the removal of outliers by  
22 default using the method of Carling (2000) to focus more efficiently on estimating what  
23 typical clocks usually do (without suppressing natural variability in time series). Similarly,  
24 FlyClockbase can be used to compare the accuracy of different observation methods  
25 (Figure 8) and many other *Attributes*. An important contribution of FlyClockbase towards  
26 simulations of fly clock models of gene expression variability is its rich set of over 400  
27 wildtype time series that can be used - in principle - to improve estimates for circadian  
28 clock parameters. Such estimates might change the rather sobering observation that  
29 most clock modelers do not use most experimental observations when deciding on the  
30 parameter values for their simulations (see Figure 4). A study using state-of-the-art  
31 inference methods for obtaining the best possible clock model has been moved beyond  
32 the scope of this paper but could start immediately.

33  
34 **View on simplifying VBIRs development.** The broader purpose of our study is  
35 to develop, describe, and use FlyClockbase as a real-world testing ground for designing  
36 an extraordinarily reliable yet simple system for long-term backwards-compatible data  
37 integration. We also explored how to annotate, name, reference, identify, store, query,  
38 retrieve, and analyze the imperfect and complex biological data and its translation into  
39 well-defined computational concepts. Developing these capabilities is essential for the  
40 long-term mission of programming languages like Evolvix that aim to provide built-in  
41 support for biological research. This goal requires unusual amounts of direct user

1 feedback from experimental biologists to the language designers, as described  
2 elsewhere (LOEWE 2016). Since computers and their computations are ultimately  
3 abstract, software engineers have come to value the input of so called ‘domain experts’  
4 without whom it would be impossible to develop efficient and reliable non-trivial  
5 systems. Such feedback is easier to provide in engineering and other technical  
6 scenarios where domain experts and software engineers tend to speak a similar  
7 language. However, such a shared language does not usually exist in biology where the  
8 ‘domain experts’ are experimental biologists who often are not used to expressing their  
9 expertise in a form easily understood by software engineers. It is an important goal of  
10 Evolvix to fill that gap and enable the best experimental biologists to express their  
11 expertise in a form that is readily translatable into computable models. Simplifying the  
12 construction of VBIRs is an essential component of this larger goal and critically  
13 important for evolutionary systems biology (LOEWE 2016).  
14

15 **View on Evolutionary System Biology.** The ultimate long-term purpose of  
16 FlyClockbase is to substantially contribute towards implementing the vision of  
17 mechanistic simulations in evolutionary systems biology as detailed elsewhere (LOEWE  
18 2009; LOEWE 2012; LOEWE 2016). Evolutionary systems biology aims to quantify fitness  
19 landscapes by mapping genotypes (via realistic fitness causality networks) to  
20 phenotypes and ultimately fitness. Since circadian clocks have a large impact on  
21 fitness, their behavior is of direct evolutionary importance (BEAVER *et al.* 2002; BEAVER  
22 *et al.* 2003; DODD *et al.* 2005; LOEWE AND HILLSTON 2008; AKMAN *et al.* 2010; BEAVER *et al.*  
23 *et al.* 2010). Constructing a high-quality model of a circadian clock in *D. melanogaster*  
24 could thus provide the opportunity to explore many mutant options *in silico* (LOEWE AND  
25 HILLSTON 2008) and thus bring us closer to the goal of quantifying fitness landscapes of  
26 interest (LOEWE 2009; LOEWE 2012; LOEWE 2016). To enable this vision, myriads of  
27 models on the scale of FlyClockbase will need to be constructed, connected and  
28 analyzed both individually and in various combinations. Most of today’s tools do not  
29 manage imprecision with the high degree of precision that is needed for integrating  
30 models at such a scale. To address these problems, we need the VBIRs automation  
31 discussed above and other new approaches to biological model curation.  
32

33 **Biological model curation.** The substantial needs for biological model curation  
34 illustrated in this study highlight a challenge faced by biology as a discipline.  
35 Researchers have accumulated very large amounts of biological data that is currently  
36 scattered across the scientific literature in forms that are difficult to access efficiently (or  
37 become completely inaccessible as lab notebooks are being thrown out or primary data  
38 is lost from hard drives). In FlyClockbase we integrated scattered data from across the  
39 literature. The substantial amount of work involved forced us to acknowledge, that it is  
40 not possible to engage in the integration of biological information at this scale without a  
41 substantial investment of time. Even if VBIRs construction is eventually simplified to the

1 highest possible degree by the most user-friendly compiler and VBIRs construction  
2 environment imaginable, the need for model curation in biology will not become trivial.  
3 On the contrast, such a compiler could motivate a new generation of biologists to  
4 actually revisit and integrate data that has long been ignored, because using it without  
5 compiler support would have been too tedious. This possibility will likely boost interest in  
6 a currently unusual avenue to biological research that is not well represented in the  
7 biological job market of today.

8 *Status quo.* For a long time, most biology undergraduates have been aiming to  
9 work at the bench in a wet-lab. Biologists overly focused on wet-lab work might  
10 undervalue the importance of biological model curation by underestimating the  
11 intellectual efforts it requires. However, what use is experimental data if it remains  
12 inaccessible? While biological model curation does not generate new data *per se*, it  
13 makes existing experimental observations accessible in integrated forms. The resulting  
14 information repositories, such as GeneBank, are prime sources of data used by  
15 computational biologists. The rising importance of computational modeling and  
16 bioinformatics in biology is now recognized well enough so that students in these areas  
17 can readily self-identify and point to labs, role models and career paths. Such  
18 computational professions require substantial training in formal methods, quantitative  
19 approaches and computational tools – usually not easily understood by experimental  
20 biologists who dedicate their career to investigating a particular system in great detail.  
21 Conversely, many computational, mathematical, and other programming biologists  
22 struggle to develop enough dedication for a career committed to studying a single  
23 biological system. The time they take to develop their computational expertise takes  
24 away from the time they have to develop their biological intuitions to the level required  
25 for high-quality biological model curation.

26 *A growing avenue to biological research.* Work on biological model curation  
27 which was integral to obtaining the results we presented alerted us to a rising need for  
28 the integration of biological data. As shown by the new biological insights presented in  
29 this study, biological model curation is as essential to biological research as  
30 bioinformatics algorithm development, original lab observations, and field data  
31 collecting. It does not stand behind lab experiments or computational work in its  
32 potential for contributing new biological insights. The low entry bar to model curation  
33 should not be mistaken for a lacking ability to advance the cutting edge of science. Each  
34 major avenue of biological research has trivial activities that do not speak to its potential  
35 for biological innovation. Pipetting samples into tubes does not reflect the complexities  
36 of experimental biology. Defining the initial values for a few variables in a program does  
37 not reflect the potential for innovations from computational biology. Similarly, the simple  
38 activity of comparing a few numbers from a few studies in a spreadsheet does not  
39 reflect the importance of biological model curation for progress towards addressing  
40 grand scientific challenges. In our experience, in depth biological model curation for

1 non-trivial questions requires a substantial amount of attention that will not realistically  
2 leave much room for additional work on the side, whether in wet-lab or in computation.  
3 The FlyClockbase work present here demanded the undivided attention of several  
4 researchers and integrators. Model curation work is easy to scale up or down, but  
5 significant new findings still require dedicated resources – as everywhere in research.

6 *What it takes to do biological model curation.* While biological model curators are  
7 still rare, their work has more history than commonly known (see Introduction on  
8 biocurators). Biological model curators must have sufficient interests in the wet-lab work  
9 necessary for generating the observations they curate to know about typical pitfalls, but  
10 they typically do not work at the bench. They must be sufficiently aware of the strengths  
11 and weaknesses of relevant modeling approaches and extract the most relevant  
12 information from the scientific literature, but they do not need to be expert programmers.  
13 Most importantly, they need a passion for ‘their’ system to the point where they want to  
14 know everything about it, irrespective of the method used to observe it. This will enable  
15 them to accumulate enough expertise for learning about the strengths and weaknesses  
16 of different methods of observation and for developing an intuition about the quality of a  
17 given data set. Such expertise is essential for helping to improve the overall  
18 reproducibility of statistical processing pipelines by improving quality of relevant input  
19 data, as recently called for (LEEK AND PENG 2015).

20 *On the shoulders of giants.* We aimed to stand on the shoulders of giants in fly  
21 clock research. This would have been impossible without the biological contributions  
22 from the high-quality model curation work that resulted in FlyClockbase. To enable more  
23 biologists to stand on the shoulders of their giants we have been working towards  
24 capturing our experiences with FlyClockbase in the definitions of *VBIRs*. We expect that  
25 constructing a corresponding *VBIRs* compiler will greatly accelerate the integration of  
26 the biological expertise required to meet the grand challenges of our time. One of these  
27 is to understand the long causality chain that starts with the daily rhythms of core clocks  
28 and ends with detailed mechanisms for the changes in health and fitness caused by the  
29 daily rhythms of the thousands of genes under circadian control.  
30  
31

# Are VBIRs like FlyClockbase The New Genome Projects?

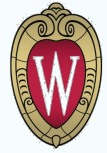

Laurence Loewe and Kate Scheuer

Wisconsin Institute for Discovery and Laboratory of Genetics, University of Wisconsin-Madison

**Overview:** Most humans are quick to spot differences, but it takes statistics to see if they matter on average. Many statistical tests detect differences between means. Robust tests for differences in variance are more difficult to find. Yet their use does not guarantee meaningful results, because data errors can easily bias observed variances beyond recognition. We demonstrated how to resolve these challenges for documenting statistically significant differences between the peak time variances of the circadian clock proteins PERIOD and TIMELESS from observations of wildtype control *Drosophila melanogaster* over 25 years of clock research. For our analyses we used **FlyClockbase**, a new **Versioned Biological Information Resource (VBIR)** with 400+ time series relevant to fly clocks. We have been designing a VBIR format for maximizing ease of use and reliable access to data in order to simplify directly integrating observed time series into parameter estimates for mechanistic fly clock models. The challenges we faced inspired us to improve the efficiency of biological model curation, an activity that will become increasingly important as we strive to make better use of all available expertise. We continue to improve the definition of VBIRs and explore ways in which they can be used more efficiently to address the grand challenge of mechanistically mapping genotypes to phenotypes.

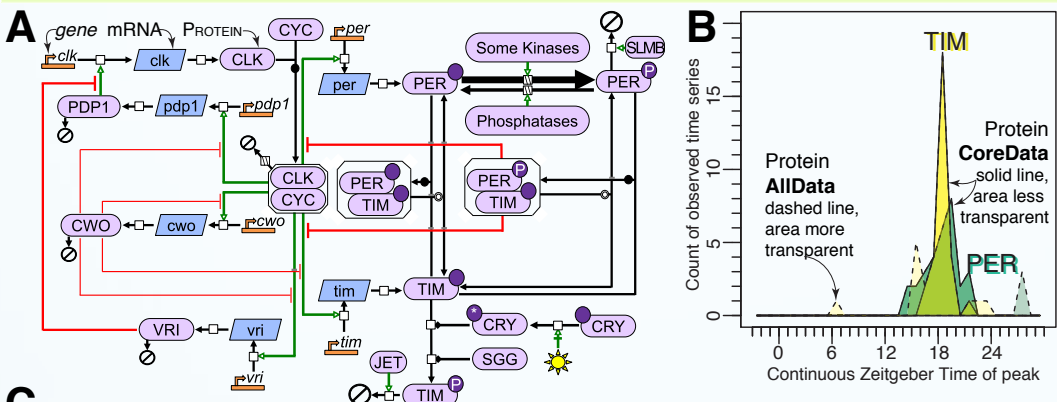

## Why VBIRs?

Genome projects convincingly show that batch processing of similar tasks boosts biological research efficiency. Costly reads of single genes shrank to simple queries in the post-genomics era, changing biology profoundly.

## Why is batch-processing efficient?

**It** inspires tools and workflows that speed-up tasks and reuse setup overheads. **It** improves quality by standardization. **It** inspires useful division of labor: a few can improve genome quality (via updates), used by many for testing hypotheses. Bundling updates into versions helps to improve quality by archiving and citing well-defined genome states reproducibly.

**We extend these ideas to other bio data types by introducing the VBIR concept for supporting FAIR data,**

- Versioned ↔ Findable
- Biological ↔ Accessible
- Information ↔ Interoperable
- Resource ↔ Reusable,

highlighting rich interactions. Serving its well-defined scope, a VBIR stores all integrated data and updates in reproducibly versioned states of a well-structured biological info resource.

**VBIRs** vary widely in scope, size, implementation approach, etc. Yet, as indicated by the 'V', they provide past *versioned variants* via long-term, stable, reproducible URLs. Stable causal VBIRs inspire construction of consequential VBIRs, and help capture complex biological expertise in causality networks. Reproducibility of overall conclusions depends on the stability of VBIR data formats and the reliability of recalculations after auto-importing changed causal VBIRs. Such active networks of VBIRs can infer values, test hypotheses, or simulate complex biological systems. **VBIR stability is key for efficient computing** in evolutionary systems biology and personalizing medicine. They are also critical for meeting the grand challenge of reducing the ~\$7bn/yr invested in studies with irreproducible data analyses.

**More details? See BioRxiv.org: <https://doi.org/10.1101/099192>**

We acknowledge NSF Career Award 1149123 to L.L. for support, and many others as listed in our full report.

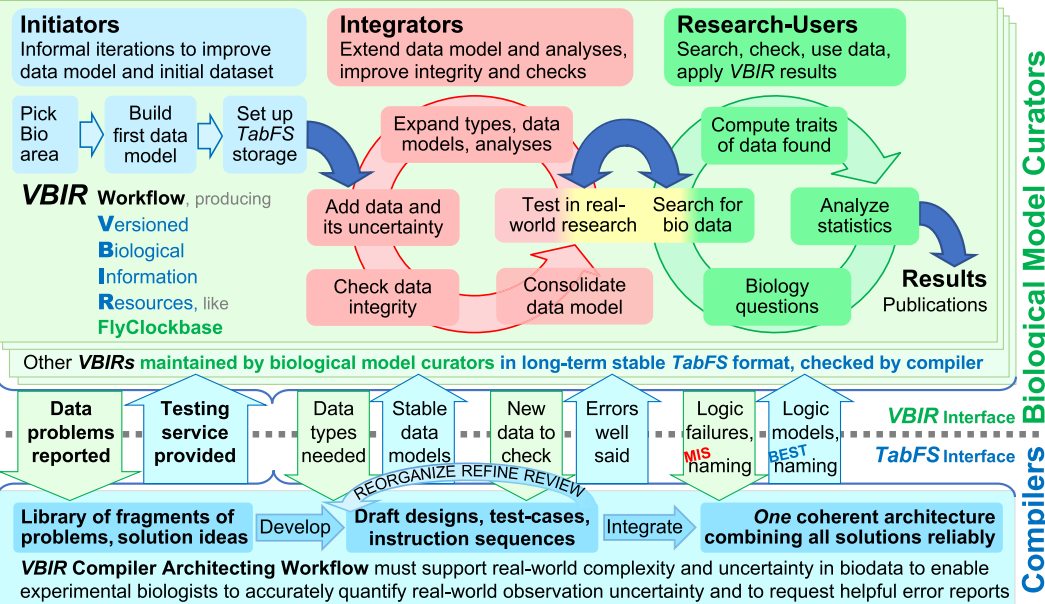

**Figure 1: Transdisciplinary workflow improving reproducibility of data analyses.** Well-curated VBIRs, like FlyClockbase, boost reproducibility and hypothesis testing speed, like genome projects. We show this by integrating into FlyClockbase 86 studies observing time series of (A) wildtype fly circadian clock molecular components, inferring (B) the peak hours of proteins PER and TIM, revealing differences in variances. (C) Our need for reducing data errors inspired compiler designs for simplifying biological model curation. We found this requires cross-disciplinary effort: real-world bioresearch must meet compiler design for inspiring the complex error checks required by (usually) imperfect biodata. We have been developing a VBIR data-format that helps biologists to capture relevant (bio) domain expertise in ways that are more accessible to experts and compilers.

# FlyClockbase:

## Importance of **Biological Model Curation** for Analyzing Variability in the Circadian Clock of *Drosophila melanogaster* by Integrating Time Series from 25 Years of Research

Katherine S. **Scheuer**<sup>\*,†</sup>, Bret **Hanlon**<sup>‡</sup>, Jerdon W. **Dresel**<sup>\*,†</sup>, Erik D. **Nolan**<sup>\*,†</sup>,  
John C. **Davis**<sup>‡</sup>, Laurence **Loewe**<sup>\*,†</sup>

<sup>\*</sup>Systems Biology Theme, Wisconsin Institute for Discovery,  
University of Wisconsin-Madison, Madison, WI, 53715

<sup>†</sup>Laboratory of Genetics, University of Wisconsin-Madison, Madison, WI 53706

<sup>‡</sup>Department of Statistics, University of Wisconsin-Madison, Madison, WI, 53706

### General Article Summary

Circadian clocks impact health and fitness by controlling daily rhythms of gene-expression through complex gene-regulatory networks. Deciphering how they work requires experimentally tracking changes in amounts of clock components. We designed FlyClockbase to simplify data-access for biologists and modelers, curating over 400 time series observed in wildtype fruit flies from 25 years of clock research. Substantial biological model curation was essential for identifying differences in peak time variance of the clock-proteins ‘PERIOD’ and ‘TIMELESS’, which probably stem from differences in phosphorylation-network complexity.

We repeatedly encountered systemic limitations of contemporary data analysis strategies in our work on circadian clocks. Thus, we used it as an opportunity for composing a panoramic view of the broader challenges in biological model curation, which are likely to increase as biologists aim to integrate all existing expertise in order to address diverse grand challenges. We developed and tested a trans-disciplinary research workflow, which enables biologists and compiler-architects to define biology-friendly compilers for efficiently constructing and maintaining Versioned Biological Information Resources (VBIRs). We report insights gleaned from our practical clock research that are essential for defining a VBIRs infrastructure, which improves the efficiency of biological model curation to the point where it can be democratized.

Latest version at **BioRxiv.org** : <https://doi.org/10.1101/099192>
